# Supplementary material for: Helicobacter pylori Infection–Related Long Non-Coding RNA Signatures Predict the Prognostic Status for Gastric Cancer Patients
Source: Front Oncol. 2021 Jul 27;11:709796. doi: 10.3389/fonc.2021.709796 (PMC8353258; doi:10.3389/fonc.2021.709796)
Supplement: Supplementary file 3 [file Table_1.xlsx]

## Sheet: Table S1
Table S1. H.pylori infection related genes
> Genes down-regulated in AGS cells (gastric adenocarcinoma): control versus H. pylori LPS.	> Genes up-regulated in AGS cells (gastric adenocarcinoma): control versus H. pylori LPS.	> Helicobacter pylori infection	> Epithelial cell signaling in Helicobacter pylori infection
AFF4	ACAP1	CARMIL2	ADAM10
ARHGAP9	ACIN1	CORIN	ADAM17
ARID4B	ADAMTS10	FLT1	ATP6AP1
ASH1L	AGTPBP1	IFNGR1	ATP6V0A1
ATXN7	AIFM1	STOX1	ATP6V0A2
BCLAF1	ANKRD16		ATP6V0A4
BDP1	ANLN		ATP6V0B
BOD1L1	ARHGAP19		ATP6V0C
CASD1	ARHGAP30		ATP6V0D1
CCL3	ARHGAP45		ATP6V0D2
CCNL1	ATAD2		ATP6V0E1
CCNL2	ATAD5		ATP6V0E2
CCNT1	BAIAP3		ATP6V1A
CCNT2	BAZ1A		ATP6V1B1
CD69	BCLAF1		ATP6V1B2
CDK11B	BMPR1A		ATP6V1C1
CDR2	BRCA1		ATP6V1C2
CEBPZ	BTK		ATP6V1D
CEP95	CASP4		ATP6V1E1
CLCN7	CD99L2		ATP6V1E2
CLK4	CDC16		ATP6V1F
CMAHP	CDK16		ATP6V1G1
CNTRL	CDKN2C		ATP6V1G2
COG3	CENPH		ATP6V1G3
CSNK1A1	CENPI		ATP6V1H
CTLA4	CENPL		CASP3
CTSE	CEP95		CCL5
CXCR5	CHTF18		CDC42
DDX17	CIT		CHUK
DDX3X	CKAP2L		CSK
DDX5	CKAP5		CXCL1
DENND1C	CLCN7		CXCL8
DHX36	CMPK2		CXCR1
DICER1	CNIH4		CXCR2
DOCK10	CPSF1		EGFR
DOCK9	CXCL13		F11R
DUSP6	CYP17A1		GIT1
EEA1	CYP20A1		HBEGF
EML4	DDX46		IGSF5
ENTPD1	DEPDC1		IKBKB
ENTPD4	DGCR8		IKBKG
EPS8L1	DHX30		JAM2
ERBIN	DNA2		JAM3
EXOC1	DNM1L		JUN
EXOSC2	DYNC1LI2		LYN
FAM120A	DYNLL2		MAP2K4
FBXL20	DZIP1		MAP3K14
FOSB	E2F8		MAPK10
FRG1	ELMOD2		MAPK11
GBP4	EME1		MAPK12
GBP5	ENTPD1		MAPK13
GBP6	ENTR1		MAPK14
GEMIN5	ESCO2		MAPK8
GNL2	ESPL1		MAPK9
GPR132	FAM193B		MET
GRAP2	FAM76B		NFKB1
HNRNPH1	FBXO48		NFKBIA
HNRNPR	FYCO1		NOD1
IDE	G2E3		PAK1
ING4	G3BP1		PLCG1
ITGB2	GALNT7		PLCG2
ITSN2	GANAB		PTPN11
IVNS1ABP	GBP5		PTPRZ1
JAK1	GDI1		RAC1
JCHAIN	GMEB2		RELA
KCNN4	GNPTAB		SRC
KTN1	GPSM2		TCIRG1
L3MBTL3	GRAMD1A		TJP1
LAX1	GRK5
LGALS8	GTF3C4
LILRB4	GZF1
MALT1	H1-1
MAP11	HELLS
MAPK8IP3	HNRNPH1
MARCHF7	HNRNPU
MBNL1	IFITM2
MED8	IKBKE
MOB3A	IL12RB2
MPHOSPH10	ING1
MRPS21	IRAG2
MTA3	IVNS1ABP
MX1	KIF15
MYB	KIF4A
MYC	MAGI3
MYCBP2	MAN1B1
NAMPT	MAP3K7
NCLN	MAPK8IP3
NEMP2	MCM4
NFKB2	MDM2
NIPBL	MIS18BP1
NKTR	MLEC
NLRC5	MLH1
NR4A1	MPHOSPH9
OGT	MTMR4
PDE2A	MTO1
PDE4D	NAA35
PDK1	NCAPD2
PHF21A	NCAPD3
PIK3C2A	NCAPH
PIN4	NCLN
PKNOX1	NDC1
PLCB2	NELFCD
PNISR	NOP58
PPCDC	PANK3
PPIL4	PAPOLA
PPP3R1	PCGF6
PPP4R3A	PDE4D
PRMT7	PHF11
PRPF38B	PIF1
PRPF4B	PIH1D1
PRRC2C	PIK3C2A
RANBP6	PLK1
RASA1	PLOD2
RBM39	PLXNC1
RELB	POLA2
RGS1	PPM1J
RPS6KB1	PPOX
RUNDC3B	PREB
SAMD3	PRKAR2B
SEMA7A	PRPF3
SENP5	PTPN12
SESN3	PTPN7
SETBP1	PTPN9
SFT2D1	RACGAP1
SHOC2	RAD51
SIRT7	RAF1
SLC16A5	RASGRP1
SLC1A5	RASGRP2
SLC20A1	RASGRP3
SNAPC4	RBM15
SRSF10	REXO4
SRSF2	RFK
SRSF6	RNF170
SRSF7	RNF4
STAT1	RPRD1A
STK39	RRM2
STX4	RTEL1
TAF4	RTF1
TBC1D2B	SAMD3
TENT5C	SBF1
THAP12	SC5D
TIA1	SEC24C
TMEM62	SEMA4A
TMEM87B	SGO1
TNRC6A	SGO2
TOMM70	SLC4A2
TPR	SMPDL3B
TRAF1	SNRNP70
TRIM68	SOAT2
TTC14	SRSF6
TUG1	SRSF7
USP33	SSR3
VPS36	SUPT20H
VWA5A	SUV39H1
XAF1	TAF1
XRN2	TAF1D
ZBTB41	TEP1
ZC3H14	TGDS
ZC3H7A	THAP3
ZC3HAV1	THY1
ZFAND2A	TMPRSS13
ZFC3H1	TNPO2
ZKSCAN3	TOE1
ZNRF1	TPR
ZRSR2	TRAP1
	TRPV2
	TUBGCP4
	TXLNA
	UHRF1
	USP15
	USP37
	USP5
	UTP20
	WDHD1
	WDR62
	WDR82
	ZBTB41
	ZCRB1
	ZMYM5
	ZMYND11

## Sheet: Table S2
Table S2. Differentially expressed h.pylori infection related genes.
name	id	baseMean	log2FoldChange	lfcSE	stat	pvalue	padj
CXCL13	ENSG00000156234.7	2022.4	6.14821	0.999063	6.15397	7.56e-10	2.77e-08
CXCL1	ENSG00000163739.4	5953.31	4.98469	0.80226	6.21331	5.19e-10	2.39e-08
GBP5	ENSG00000154451.13	2758.4	4.91194	0.849791	5.78018	7.46e-09	1.95e-07
KCNN4	ENSG00000104783.10	2764.24	4.07508	0.65795	6.1936	5.88e-10	2.39e-08
CTLA4	ENSG00000163599.13	291.256	3.55554	0.719446	4.94206	7.73e-07	8.92e-06
ATP6V0D2	ENSG00000147614.3	113.436	3.16974	0.775904	4.08522	4.4e-05	0.00027159
CORIN	ENSG00000145244.10	229.752	2.95296	0.793325	3.72226	0.000197449	0.000950872
MYB	ENSG00000118513.17	2151.86	2.92447	0.63267	4.62242	3.79e-06	3.56e-05
UHRF1	ENSG00000276043.3	1864.44	2.87674	0.406788	7.07185	1.53e-12	2.8e-10
PTPN7	ENSG00000143851.14	957.225	2.85934	0.578767	4.9404	7.8e-07	8.92e-06
CXCR5	ENSG00000160683.4	54.3654	2.84683	1.24055	2.2948	0.0217443	0.0491261
CXCL8	ENSG00000169429.9	8051.94	2.81509	0.960677	2.93032	0.00338618	0.0105029
CCL3	ENSG00000277632.1	321.564	2.79388	0.767959	3.63806	0.000274695	0.00127264
SAMD3	ENSG00000164483.15	101.733	2.78506	0.67307	4.13785	3.51e-05	0.000240813
LAX1	ENSG00000122188.11	339.904	2.76337	0.739073	3.73897	0.000184773	0.000913876
RRM2	ENSG00000171848.12	6267.94	2.74318	0.447796	6.12596	9.01e-10	3e-08
KIF4A	ENSG00000090889.11	1867.02	2.72929	0.413381	6.60235	4.05e-11	4.94e-09
HELLS	ENSG00000119969.13	2539.44	2.70668	0.355862	7.60597	2.83e-14	1.03e-11
LILRB4	ENSG00000186818.11	1029.02	2.60903	0.641901	4.06454	4.81e-05	0.000288763
DEPDC1	ENSG00000024526.15	1420.94	2.57918	0.454569	5.67389	1.4e-08	3.01e-07
ESCO2	ENSG00000171320.13	1199.18	2.57804	0.44179	5.83545	5.36e-09	1.64e-07
SMPDL3B	ENSG00000130768.13	1610.03	2.56372	0.566863	4.52265	6.11e-06	5.32e-05
E2F8	ENSG00000129173.11	1511.67	2.5388	0.447297	5.67588	1.38e-08	3.01e-07
MET	ENSG00000105976.13	9420.81	2.50769	0.559643	4.48087	7.43e-06	6.05e-05
CCL5	ENSG00000271503.4	3078.38	2.47025	0.657344	3.75793	0.000171327	0.000858983
EME1	ENSG00000154920.13	315.717	2.4676	0.445306	5.54136	3e-08	5.78e-07
NCAPH	ENSG00000121152.8	1479.77	2.46265	0.425611	5.78617	7.2e-09	1.95e-07
KIF15	ENSG00000163808.15	1126.88	2.45727	0.395627	6.21109	5.26e-10	2.39e-08
GBP4	ENSG00000162654.8	8014.83	2.4524	0.773717	3.16963	0.00152633	0.00558637
PLK1	ENSG00000166851.13	4481.56	2.44852	0.426504	5.7409	9.42e-09	2.3e-07
DNA2	ENSG00000138346.13	809.849	2.41099	0.378142	6.37589	1.82e-10	1.18e-08
RGS1	ENSG00000090104.10	4150.32	2.40292	0.615179	3.90605	9.38e-05	0.000512501
RAD51	ENSG00000051180.15	795.635	2.33181	0.363995	6.40615	1.49e-10	1.18e-08
NLRC5	ENSG00000140853.14	5745.57	2.32738	0.429147	5.42327	5.85e-08	1.02e-06
ARHGAP9	ENSG00000123329.16	842.591	2.06391	0.578059	3.57042	0.000356412	0.00157165
WDR62	ENSG00000075702.15	1443.59	2.05304	0.407214	5.04169	4.61e-07	5.82e-06
ANLN	ENSG00000011426.9	4968.73	2.03859	0.395614	5.15297	2.56e-07	3.48e-06
ITGB2	ENSG00000160255.15	4150.1	1.98714	0.612434	3.24467	0.00117588	0.00443684
LYN	ENSG00000254087.6	6752.74	1.97075	0.348709	5.65157	1.59e-08	3.23e-07
CHTF18	ENSG00000127586.15	1429.48	1.89461	0.363071	5.21828	1.81e-07	2.64e-06
ATAD2	ENSG00000156802.11	4700.28	1.89129	0.358176	5.28032	1.29e-07	1.97e-06
GRAP2	ENSG00000100351.15	294.892	1.86696	0.600615	3.10842	0.00188093	0.00666238
GPR132	ENSG00000183484.10	406.948	1.83132	0.542197	3.3776	0.000731209	0.00294091
CENPI	ENSG00000102384.12	492.437	1.81251	0.350866	5.16582	2.39e-07	3.37e-06
MCM4	ENSG00000104738.15	8225.08	1.73264	0.384411	4.50727	6.57e-06	5.46e-05
BTK	ENSG00000010671.14	421.535	1.7221	0.670557	2.56816	0.010224	0.0261363
STAT1	ENSG00000115415.17	24265.8	1.63738	0.438526	3.73381	0.000188601	0.000920373
MLEC	ENSG00000110917.6	23753.3	1.61391	0.343674	4.69604	2.65e-06	2.62e-05
WDHD1	ENSG00000198554.10	1108.39	1.60449	0.335721	4.77922	1.76e-06	1.84e-05
DOCK10	ENSG00000135905.17	1169.18	1.59965	0.565269	2.82989	0.00465638	0.0134917
SLC16A5	ENSG00000170190.14	2273.59	1.59654	0.491416	3.24886	0.00115867	0.00441744
NDC1	ENSG00000058804.11	4142.56	1.54923	0.291331	5.31776	1.05e-07	1.67e-06
EML4	ENSG00000143924.17	9391.6	1.5442	0.242572	6.36594	1.94e-10	1.18e-08
ARHGAP30	ENSG00000186517.12	1673.93	1.53557	0.496962	3.08991	0.00200217	0.00696647
RASGRP3	ENSG00000152689.16	1157.56	1.51313	0.423234	3.57515	0.000350028	0.00156232
PLCB2	ENSG00000137841.10	1008.65	1.49595	0.499826	2.99294	0.002763	0.00902908
IVNS1ABP	ENSG00000116679.14	11627.4	1.4066	0.302584	4.64861	3.34e-06	3.22e-05
RASGRP1	ENSG00000172575.10	715.984	1.36443	0.544877	2.50412	0.0122758	0.029953
DENND1C	ENSG00000205744.8	1665.69	1.33111	0.346101	3.84603	0.000120047	0.000618836
TCIRG1	ENSG00000110719.8	7773.01	1.26171	0.306335	4.1187	3.81e-05	0.000251642
SLC1A5	ENSG00000105281.11	11038.4	1.25299	0.485666	2.57994	0.00988164	0.0258334
GALNT7	ENSG00000109586.10	7137.47	1.21297	0.459498	2.63977	0.00829615	0.0220028
CMPK2	ENSG00000134326.10	1564.77	1.21293	0.551217	2.20045	0.0277748	0.0605094
ATAD5	ENSG00000176208.7	1068.02	1.20883	0.276622	4.36996	1.24e-05	9.1e-05
PLCG2	ENSG00000197943.8	1746.95	1.19361	0.566138	2.10833	0.0350026	0.0727895
PLXNC1	ENSG00000136040.7	1681.92	1.18365	0.502974	2.3533	0.0186077	0.0436564
NCLN	ENSG00000125912.9	9405.34	1.16375	0.263362	4.41884	9.92e-06	7.9e-05
XAF1	ENSG00000132530.15	1389.79	1.14234	0.501009	2.28007	0.0226035	0.0504443
TMEM62	ENSG00000137842.5	2116.77	1.14179	0.283214	4.03155	5.54e-05	0.000321902
BRCA1	ENSG00000012048.18	2101.61	1.11729	0.325882	3.42852	0.000606885	0.00249573
THY1	ENSG00000154096.12	6851.18	1.09994	0.540383	2.03548	0.0418027	0.0840647
PIF1	ENSG00000140451.11	561.101	1.0742	0.37146	2.89184	0.00382991	0.0116445
F11R	ENSG00000158769.16	7471.62	1.05292	0.361953	2.909	0.00362587	0.0111518
CENPH	ENSG00000153044.8	579.143	1.04676	0.38959	2.68683	0.00721341	0.0195209
TGDS	ENSG00000088451.9	1254.22	1.04057	0.266998	3.8973	9.73e-05	0.000523544
NCAPD3	ENSG00000151503.11	3428.37	1.0174	0.308701	3.29575	0.00098159	0.0037817
TMEM87B	ENSG00000153214.8	5834.31	1.0054	0.24425	4.11629	3.85e-05	0.000251642
ING4	ENSG00000111653.18	923.701	-1.00542	0.314301	-3.19891	0.00137948	0.00515196
PKNOX1	ENSG00000160199.13	1448.08	-1.0083	0.20068	-5.02444	5.05e-07	6.16e-06
TNPO2	ENSG00000105576.14	5585.52	-1.03276	0.212805	-4.85309	1.22e-06	1.31e-05
SEC24C	ENSG00000176986.13	5139.84	-1.03946	0.353376	-2.94152	0.00326608	0.010305
FBXL20	ENSG00000108306.10	2626.25	-1.07404	0.355512	-3.0211	0.00251855	0.00853509
DYNLL2	ENSG00000264364.2	5082.08	-1.08249	0.236231	-4.58234	4.6e-06	4.21e-05
ATP6V1D	ENSG00000100554.10	2820.58	-1.08737	0.256075	-4.2463	2.17e-05	0.000152968
DYNC1LI2	ENSG00000135720.11	5968.57	-1.10605	0.250779	-4.41043	1.03e-05	8.03e-05
CYP20A1	ENSG00000119004.13	3169.72	-1.15858	0.26509	-4.3705	1.24e-05	9.1e-05
MYC	ENSG00000136997.13	9618.54	-1.16749	0.490497	-2.38021	0.0173026	0.0408565
MOB3A	ENSG00000172081.12	4567.89	-1.17269	0.296101	-3.96045	7.48e-05	0.000414856
NFKBIA	ENSG00000100906.9	8506.32	-1.19364	0.33268	-3.58796	0.000333274	0.00150591
MAP3K14	ENSG00000006062.12	1902.33	-1.22837	0.345791	-3.55236	0.000381793	0.00166353
TJP1	ENSG00000104067.15	10572.2	-1.23303	0.30698	-4.01665	5.9e-05	0.000337586
MBNL1	ENSG00000152601.16	12828.7	-1.25912	0.258155	-4.87739	1.07e-06	1.19e-05
ZNRF1	ENSG00000186187.10	2289.35	-1.26686	0.309798	-4.08931	4.33e-05	0.00027159
EGFR	ENSG00000146648.14	9829.24	-1.29189	0.61253	-2.1091	0.0349357	0.0727895
PHF21A	ENSG00000135365.14	2443.8	-1.29191	0.294454	-4.38746	1.15e-05	8.74e-05
ZMYND11	ENSG00000015171.17	5737.07	-1.38014	0.253286	-5.44892	5.07e-08	9.27e-07
CD99L2	ENSG00000102181.18	2125.83	-1.4414	0.355267	-4.05723	4.97e-05	0.000293139
JUN	ENSG00000177606.6	15204	-1.50677	0.44089	-3.41756	0.00063184	0.00256948
RASGRP2	ENSG00000068831.17	583.091	-1.63329	0.764593	-2.13615	0.0326671	0.0687135
PRKAR2B	ENSG00000005249.11	1128.68	-1.72594	0.692042	-2.49398	0.0126319	0.0306176
PDE4D	ENSG00000113448.15	2328.2	-1.74008	0.483823	-3.59652	0.000322507	0.00147547
BMPR1A	ENSG00000107779.10	2882.19	-1.77617	0.33081	-5.36915	7.91e-08	1.32e-06
FYCO1	ENSG00000163820.13	5231.48	-1.93876	0.407143	-4.76187	1.92e-06	1.95e-05
STOX1	ENSG00000165730.13	308.626	-2.10262	0.601472	-3.49579	0.000472655	0.00198841
EPS8L1	ENSG00000131037.13	4554.51	-2.10894	0.637933	-3.3059	0.000946733	0.00368622
NR4A1	ENSG00000123358.18	9887.36	-2.14498	0.700397	-3.06252	0.00219481	0.00750749
SETBP1	ENSG00000152217.15	1363.28	-2.25789	0.713372	-3.1651	0.00155032	0.00561798
DZIP1	ENSG00000134874.16	671.743	-2.2773	0.624687	-3.64551	0.00026686	0.00125219
JAM3	ENSG00000166086.11	1846.17	-2.52631	0.553506	-4.5642	5.01e-06	4.48e-05
CXCR2	ENSG00000180871.6	316.488	-2.55011	1.0023	-2.54425	0.0109512	0.0276423
PDE2A	ENSG00000186642.14	655.267	-2.6049	0.63804	-4.08266	4.45e-05	0.00027159
MAPK10	ENSG00000109339.17	356.828	-2.91747	0.705593	-4.13478	3.55e-05	0.000240813
JAM2	ENSG00000154721.13	1165.41	-2.933	0.689255	-4.25532	2.09e-05	0.000149809
FOSB	ENSG00000125740.12	7292.99	-3.10842	1.00673	-3.08763	0.00201761	0.00696647
ATP6V1G2	ENSG00000213760.9	51.2571	-3.54203	0.701315	-5.05055	4.41e-07	5.76e-06

## Sheet: Table S3
Table S3. GO annotation details.
ID	Description	Class	GeneRatio	BgRatio	pvalue	p.adjust	qvalue	geneID	Count
GO:0006260	DNA replication	BP	15/111	273/18866	6.83344e-11	1.72203e-07	1.35014e-07	ATAD5/BRCA1/CHTF18/DNA2/E2F8/EGFR/EME1/ESCO2/ING4/JUN/MCM4/PIF1/RAD51/RRM2/WDHD1	15
GO:1990266	neutrophil migration	BP	10/111	122/18866	2.61789e-09	3.29854e-06	2.5862e-06	CCL3/CCL5/CD99L2/CXCL1/CXCL13/CXCL8/CXCR2/ITGB2/JAM3/PDE4D	10
GO:0030593	neutrophil chemotaxis	BP	9/111	103/18866	9.62609e-09	8.08591e-06	6.33971e-06	CCL3/CCL5/CXCL1/CXCL13/CXCL8/CXCR2/ITGB2/JAM3/PDE4D	9
GO:0097530	granulocyte migration	BP	10/111	150/18866	1.93756e-08	1.22066e-05	9.57051e-06	CCL3/CCL5/CD99L2/CXCL1/CXCL13/CXCL8/CXCR2/ITGB2/JAM3/PDE4D	10
GO:0060326	cell chemotaxis	BP	13/111	311/18866	3.65334e-08	1.84128e-05	1.44365e-05	CCL3/CCL5/CXCL1/CXCL13/CXCL8/CXCR2/CXCR5/ITGB2/JAM3/LYN/MET/NR4A1/PDE4D	13
GO:0071621	granulocyte chemotaxis	BP	9/111	127/18866	6.04647e-08	2.53952e-05	1.99109e-05	CCL3/CCL5/CXCL1/CXCL13/CXCL8/CXCR2/ITGB2/JAM3/PDE4D	9
GO:0097529	myeloid leukocyte migration	BP	11/111	222/18866	7.89269e-08	2.84137e-05	2.22776e-05	CCL3/CCL5/CD99L2/CXCL1/CXCL13/CXCL8/CXCR2/ITGB2/JAM3/LYN/PDE4D	11
GO:0022409	positive regulation of cell-cell adhesion	BP	12/111	279/18866	9.28018e-08	2.92326e-05	2.29196e-05	CCL5/CTLA4/CXCL13/F11R/GRAP2/ITGB2/LILRB4/LYN/MYB/RASGRP1/THY1/TJP1	12
GO:0043547	positive regulation of GTPase activity	BP	14/111	406/18866	1.15459e-07	3.10941e-05	2.43791e-05	ARHGAP30/ARHGAP9/CCL3/CCL5/CXCL13/DEPDC1/DOCK10/F11R/JUN/RASGRP1/RASGRP2/RASGRP3/RGS1/THY1	14
GO:0030595	leukocyte chemotaxis	BP	11/111	232/18866	1.23389e-07	3.10941e-05	2.43791e-05	CCL3/CCL5/CXCL1/CXCL13/CXCL8/CXCR2/CXCR5/ITGB2/JAM3/LYN/PDE4D	11
GO:0043087	regulation of GTPase activity	BP	15/111	481/18866	1.45153e-07	3.32533e-05	2.6072e-05	ARHGAP30/ARHGAP9/CCL3/CCL5/CXCL13/DEPDC1/DOCK10/F11R/JUN/PLXNC1/RASGRP1/RASGRP2/RASGRP3/RGS1/THY1	15
GO:0071216	cellular response to biotic stimulus	BP	11/111	246/18866	2.22599e-07	4.67458e-05	3.66507e-05	BTK/CCL3/CCL5/CMPK2/CXCL1/CXCL13/CXCL8/EME1/LYN/NFKBIA/PDE4D	11
GO:0002685	regulation of leukocyte migration	BP	10/111	212/18866	4.98533e-07	9.66387e-05	7.57689e-05	CCL3/CCL5/CD99L2/CXCL13/CXCL8/CXCR2/JAM2/JAM3/LYN/THY1	10
GO:0070098	chemokine-mediated signaling pathway	BP	7/111	88/18866	8.64757e-07	0.000155656	0.000122041	CCL3/CCL5/CXCL1/CXCL13/CXCL8/CXCR2/CXCR5	7
GO:0050867	positive regulation of cell activation	BP	13/111	421/18866	1.17144e-06	0.000196802	0.000154302	ATAD5/BTK/CCL3/CCL5/CTLA4/F11R/GRAP2/ITGB2/LILRB4/LYN/MYB/RASGRP1/THY1	13
GO:0007159	leukocyte cell-cell adhesion	BP	12/111	364/18866	1.57697e-06	0.000234577	0.000183919	CCL5/CTLA4/F11R/GRAP2/ITGB2/JAM2/LAX1/LILRB4/LYN/MYB/RASGRP1/THY1	12
GO:1990868	response to chemokine	BP	7/111	97/18866	1.67555e-06	0.000234577	0.000183919	CCL3/CCL5/CXCL1/CXCL13/CXCL8/CXCR2/CXCR5	7
GO:1990869	cellular response to chemokine	BP	7/111	97/18866	1.67555e-06	0.000234577	0.000183919	CCL3/CCL5/CXCL1/CXCL13/CXCL8/CXCR2/CXCR5	7
GO:0022407	regulation of cell-cell adhesion	BP	13/111	439/18866	1.8634e-06	0.000244755	0.000191898	CCL5/CTLA4/CXCL13/F11R/GRAP2/ITGB2/LAX1/LILRB4/LYN/MYB/RASGRP1/THY1/TJP1	13
GO:0002687	positive regulation of leukocyte migration	BP	8/111	142/18866	1.9425e-06	0.000244755	0.000191898	CCL3/CCL5/CD99L2/CXCL13/CXCL8/CXCR2/JAM2/THY1	8
GO:2000403	positive regulation of lymphocyte migration	BP	5/111	38/18866	2.76856e-06	0.000332227	0.00026048	CCL3/CCL5/CD99L2/CXCL13/JAM2	5
GO:0006261	DNA-dependent DNA replication	BP	8/111	151/18866	3.07736e-06	0.000352498	0.000276373	ATAD5/CHTF18/DNA2/E2F8/EME1/MCM4/RAD51/WDHD1	8
GO:0045740	positive regulation of DNA replication	BP	5/111	40/18866	3.59556e-06	0.000393948	0.000308872	ATAD5/DNA2/E2F8/EGFR/JUN	5
GO:0071222	cellular response to lipopolysaccharide	BP	9/111	208/18866	3.87293e-06	0.000406658	0.000318838	CCL3/CCL5/CMPK2/CXCL1/CXCL13/CXCL8/LYN/NFKBIA/PDE4D	9
GO:0006275	regulation of DNA replication	BP	7/111	112/18866	4.3956e-06	0.000443076	0.000347391	ATAD5/CHTF18/DNA2/E2F8/EGFR/ESCO2/JUN	7
GO:0002696	positive regulation of leukocyte activation	BP	12/111	406/18866	4.85381e-06	0.000470446	0.00036885	ATAD5/BTK/CCL3/CCL5/CTLA4/GRAP2/ITGB2/LILRB4/LYN/MYB/RASGRP1/THY1	12
GO:0071219	cellular response to molecule of bacterial origin	BP	9/111	222/18866	6.57479e-06	0.000613647	0.000481126	CCL3/CCL5/CMPK2/CXCL1/CXCL13/CXCL8/LYN/NFKBIA/PDE4D	9
GO:0045785	positive regulation of cell adhesion	BP	12/111	428/18866	8.28094e-06	0.000745285	0.000584336	CCL5/CTLA4/CXCL13/F11R/GRAP2/ITGB2/LILRB4/LYN/MYB/RASGRP1/THY1/TJP1	12
GO:0002688	regulation of leukocyte chemotaxis	BP	7/111	124/18866	8.62015e-06	0.000749061	0.000587296	CCL3/CCL5/CXCL13/CXCL8/CXCR2/JAM3/LYN	7
GO:1903039	positive regulation of leukocyte cell-cell adhesion	BP	9/111	235/18866	1.03944e-05	0.000873127	0.000684569	CCL5/CTLA4/GRAP2/ITGB2/LILRB4/LYN/MYB/RASGRP1/THY1	9
GO:0031349	positive regulation of defense response	BP	11/111	385/18866	1.69078e-05	0.00137444	0.00107762	BTK/CCL3/CCL5/EGFR/GBP5/LYN/NFKBIA/NLRC5/PDE2A/PLCG2/RASGRP1	11
GO:0090383	phagosome acidification	BP	4/111	28/18866	2.08391e-05	0.00164108	0.00128668	ATP6V0D2/ATP6V1D/ATP6V1G2/TCIRG1	4
GO:0050851	antigen receptor-mediated signaling pathway	BP	10/111	325/18866	2.21974e-05	0.00169507	0.00132901	BTK/CTLA4/GRAP2/KCNN4/LAX1/LILRB4/LYN/PDE4D/PLCG2/THY1	10
GO:0042113	B cell activation	BP	10/111	328/18866	2.40106e-05	0.00177427	0.00139111	ATAD5/BTK/CTLA4/CXCR5/DOCK10/LAX1/LYN/PLCG2/RASGRP1/TCIRG1	10
GO:1903037	regulation of leukocyte cell-cell adhesion	BP	10/111	329/18866	2.46427e-05	0.00177427	0.00139111	CCL5/CTLA4/GRAP2/ITGB2/LAX1/LILRB4/LYN/MYB/RASGRP1/THY1	10
GO:0032496	response to lipopolysaccharide	BP	10/111	334/18866	2.80217e-05	0.00196152	0.00153792	CCL3/CCL5/CMPK2/CXCL1/CXCL13/CXCL8/LYN/NFKBIA/PDE4D/PLCG2	10
GO:0048661	positive regulation of smooth muscle cell proliferation	BP	6/111	103/18866	3.25727e-05	0.00218756	0.00171514	BMPR1A/CCL5/EGFR/JUN/MYB/STAT1	6
GO:0009612	response to mechanical stimulus	BP	8/111	209/18866	3.2987e-05	0.00218756	0.00171514	EGFR/F11R/FOSB/JUN/MAP3K14/NFKBIA/PDE2A/STAT1	8
GO:0001885	endothelial cell development	BP	5/111	64/18866	3.72416e-05	0.00234622	0.00183954	F11R/MET/PDE2A/PDE4D/TJP1	5
GO:2000401	regulation of lymphocyte migration	BP	5/111	64/18866	3.72416e-05	0.00234622	0.00183954	CCL3/CCL5/CD99L2/CXCL13/JAM2	5
GO:0050870	positive regulation of T cell activation	BP	8/111	214/18866	3.90256e-05	0.00239865	0.00188064	CCL5/CTLA4/GRAP2/LILRB4/LYN/MYB/RASGRP1/THY1	8
GO:0044786	cell cycle DNA replication	BP	5/111	65/18866	4.01572e-05	0.00240943	0.0018891	ATAD5/DNA2/E2F8/MCM4/RAD51	5
GO:0035633	maintenance of blood-brain barrier	BP	4/111	34/18866	4.59349e-05	0.00257006	0.00201504	F11R/JAM2/JAM3/TJP1	4
GO:0045123	cellular extravasation	BP	5/111	67/18866	4.65164e-05	0.00257006	0.00201504	CD99L2/F11R/ITGB2/JAM2/THY1	5
GO:0072678	T cell migration	BP	5/111	67/18866	4.65164e-05	0.00257006	0.00201504	CCL3/CCL5/CD99L2/CXCL13/F11R	5
GO:0071103	DNA conformation change	BP	10/111	355/18866	4.69138e-05	0.00257006	0.00201504	CENPH/CENPI/CHTF18/DNA2/HELLS/MCM4/NCAPD3/NCAPH/PIF1/RAD51	10
GO:0002237	response to molecule of bacterial origin	BP	10/111	356/18866	4.80345e-05	0.00257547	0.00201928	CCL3/CCL5/CMPK2/CXCL1/CXCL13/CXCL8/LYN/NFKBIA/PDE4D/PLCG2	10
GO:0051251	positive regulation of lymphocyte activation	BP	10/111	357/18866	4.91781e-05	0.00258185	0.00202428	ATAD5/BTK/CCL5/CTLA4/GRAP2/LILRB4/LYN/MYB/RASGRP1/THY1	10
GO:0019722	calcium-mediated signaling	BP	8/111	222/18866	5.05965e-05	0.00260211	0.00204016	BTK/CCL3/CXCL8/CXCR2/CXCR5/EGFR/PDE4D/PLCG2	8
GO:1902105	regulation of leukocyte differentiation	BP	9/111	290/18866	5.43652e-05	0.00274001	0.00214828	BTK/CCL3/CTLA4/JUN/LILRB4/LYN/MYB/MYC/RASGRP1	9
GO:0033572	transferrin transport	BP	4/111	36/18866	5.78188e-05	0.00285693	0.00223996	ATP6V0D2/ATP6V1D/ATP6V1G2/TCIRG1	4
GO:0033627	cell adhesion mediated by integrin	BP	5/111	71/18866	6.15512e-05	0.00298286	0.0023387	CCL5/CXCL13/ITGB2/JAM3/LYN	5
GO:0050920	regulation of chemotaxis	BP	8/111	229/18866	6.29452e-05	0.00299287	0.00234654	CCL3/CCL5/CXCL13/CXCL8/CXCR2/JAM3/LYN/MET	8
GO:0072676	lymphocyte migration	BP	6/111	117/18866	6.6661e-05	0.00311085	0.00243904	CCL3/CCL5/CD99L2/CXCL13/F11R/JAM2	6
GO:0043922	negative regulation by host of viral transcription	BP	3/111	14/18866	6.88241e-05	0.00315339	0.0024724	CCL3/CCL5/JUN	3
GO:0002683	negative regulation of immune system process	BP	11/111	463/18866	9.0027e-05	0.00405122	0.00317633	BTK/CCL3/CTLA4/CXCR2/LAX1/LILRB4/LYN/MYC/NFKBIA/NLRC5/THY1	11
GO:1902622	regulation of neutrophil migration	BP	4/111	42/18866	0.000106923	0.00472713	0.00370628	CD99L2/CXCL8/CXCR2/JAM3	4
GO:0030889	negative regulation of B cell proliferation	BP	3/111	17/18866	0.000126928	0.00542133	0.00425056	BTK/CTLA4/LYN	3
GO:0043117	positive regulation of vascular permeability	BP	3/111	17/18866	0.000126928	0.00542133	0.00425056	CXCR2/PDE2A/TJP1	3
GO:0042110	T cell activation	BP	11/111	483/18866	0.000130644	0.00548705	0.00430209	CCL5/CTLA4/GRAP2/LAX1/LILRB4/LYN/MYB/PKNOX1/RASGRP1/TCIRG1/THY1	11
GO:0050863	regulation of T cell activation	BP	9/111	332/18866	0.000152107	0.00614082	0.00481467	CCL5/CTLA4/GRAP2/LAX1/LILRB4/LYN/MYB/RASGRP1/THY1	9
GO:0061028	establishment of endothelial barrier	BP	4/111	46/18866	0.000153092	0.00614082	0.00481467	F11R/PDE2A/PDE4D/TJP1	4
GO:0001776	leukocyte homeostasis	BP	5/111	86/18866	0.000153521	0.00614082	0.00481467	CXCR2/DOCK10/JAM3/LYN/TCIRG1	5
GO:0007059	chromosome segregation	BP	9/111	334/18866	0.000159105	0.00626478	0.00491186	BRCA1/CENPH/EME1/ESCO2/KIF4A/NCAPD3/NCAPH/NDC1/PLK1	9
GO:1903706	regulation of hemopoiesis	BP	11/111	498/18866	0.000170548	0.00661202	0.00518411	BTK/CCL3/CTLA4/JUN/LILRB4/LYN/MYB/MYC/NFKBIA/RASGRP1/STAT1	11
GO:0033628	regulation of cell adhesion mediated by integrin	BP	4/111	48/18866	0.000180902	0.00680408	0.0053347	CCL5/CXCL13/JAM3/LYN	4
GO:0090382	phagosome maturation	BP	4/111	48/18866	0.000180902	0.00680408	0.0053347	ATP6V0D2/ATP6V1D/ATP6V1G2/TCIRG1	4
GO:0007265	Ras protein signal transduction	BP	9/111	346/18866	0.00020699	0.00763064	0.00598276	EPS8L1/F11R/GRAP2/JUN/LYN/MET/RASGRP1/RASGRP2/RASGRP3	9
GO:0050921	positive regulation of chemotaxis	BP	6/111	144/18866	0.000208934	0.00763064	0.00598276	CCL3/CCL5/CXCL13/CXCL8/CXCR2/MET	6
GO:0050852	T cell receptor signaling pathway	BP	7/111	206/18866	0.000217519	0.00783069	0.0061396	CTLA4/GRAP2/KCNN4/LILRB4/PDE4D/PLCG2/THY1	7
GO:0002762	negative regulation of myeloid leukocyte differentiation	BP	4/111	51/18866	0.000229206	0.00802221	0.00628976	CCL3/LILRB4/LYN/MYC	4
GO:0048146	positive regulation of fibroblast proliferation	BP	4/111	51/18866	0.000229206	0.00802221	0.00628976	EGFR/JUN/MYB/MYC	4
GO:0140131	positive regulation of lymphocyte chemotaxis	BP	3/111	21/18866	0.000244036	0.0083055	0.00651188	CCL3/CCL5/CXCL13	3
GO:0045638	negative regulation of myeloid cell differentiation	BP	5/111	95/18866	0.00024493	0.0083055	0.00651188	CCL3/LILRB4/LYN/MYC/NFKBIA	5
GO:0071622	regulation of granulocyte chemotaxis	BP	4/111	52/18866	0.000247188	0.0083055	0.00651188	CCL5/CXCL8/CXCR2/JAM3	4
GO:0050679	positive regulation of epithelial cell proliferation	BP	7/111	211/18866	0.000251799	0.00834912	0.00654607	BMPR1A/CCL5/EGFR/JUN/MYC/NR4A1/STOX1	7
GO:0002690	positive regulation of leukocyte chemotaxis	BP	5/111	96/18866	0.000257188	0.00841707	0.00659935	CCL3/CCL5/CXCL13/CXCL8/CXCR2	5
GO:0042100	B cell proliferation	BP	5/111	97/18866	0.000269907	0.00872008	0.00683692	ATAD5/BTK/CTLA4/LYN/RASGRP1	5
GO:0019886	antigen processing and presentation of exogenous peptide antigen via MHC class II	BP	5/111	99/18866	0.000296773	0.00946667	0.00742228	DYNC1LI2/DYNLL2/KIF15/KIF4A/SEC24C	5
GO:0051452	intracellular pH reduction	BP	4/111	55/18866	0.000307214	0.00967723	0.00758737	ATP6V0D2/ATP6V1D/ATP6V1G2/TCIRG1	4
GO:0017116	single-stranded DNA helicase activity	MF	4/114	18/18352	4.04066e-06	0.000706611	0.000550312	CHTF18/DNA2/PIF1/RAD51	4
GO:0042379	chemokine receptor binding	MF	6/114	70/18352	4.7744e-06	0.000706611	0.000550312	CCL3/CCL5/CXCL1/CXCL13/CXCL8/STAT1	6
GO:0008009	chemokine activity	MF	5/114	49/18352	1.29844e-05	0.00128112	0.000997745	CCL3/CCL5/CXCL1/CXCL13/CXCL8	5
GO:0008081	phosphoric diester hydrolase activity	MF	6/114	89/18352	1.92295e-05	0.00142298	0.00110823	CCL5/PDE2A/PDE4D/PLCB2/PLCG2/SMPDL3B	6
GO:0005178	integrin binding	MF	7/114	144/18352	3.23308e-05	0.00191399	0.00149062	EGFR/F11R/ITGB2/JAM2/JAM3/LYN/THY1	7
GO:0009678	pyrophosphate hydrolysis-driven proton transmembrane transporter activity	MF	4/114	31/18352	3.90392e-05	0.00192594	0.00149993	ATP6V0D2/ATP6V1D/ATP6V1G2/TCIRG1	4
GO:0019992	diacylglycerol binding	MF	3/114	12/18352	4.93048e-05	0.00208489	0.00162372	RASGRP1/RASGRP2/RASGRP3	3
GO:0003678	DNA helicase activity	MF	5/114	78/18352	0.000124584	0.00460962	0.00359	CHTF18/DNA2/MCM4/PIF1/RAD51	5
GO:0045236	CXCR chemokine receptor binding	MF	3/114	18/18352	0.000177969	0.00585319	0.00455849	CXCL1/CXCL13/CXCL8	3
GO:0048020	CCR chemokine receptor binding	MF	4/114	47/18352	0.000205003	0.00606809	0.00472586	CCL3/CCL5/CXCL13/STAT1	4
GO:0044769	ATPase activity, coupled to transmembrane movement of ions, rotational mechanism	MF	3/114	20/18352	0.000246391	0.00607764	0.0047333	ATP6V0D2/ATP6V1D/TCIRG1	3
GO:0046961	proton-transporting ATPase activity, rotational mechanism	MF	3/114	20/18352	0.000246391	0.00607764	0.0047333	ATP6V0D2/ATP6V1D/TCIRG1	3
GO:0016887	ATPase activity	MF	10/114	423/18352	0.000306804	0.00698568	0.00544049	ATAD2/ATAD5/ATP6V1G2/CHTF18/DNA2/HELLS/KIF15/MCM4/PIF1/RAD51	10
GO:0019829	ATPase-coupled cation transmembrane transporter activity	MF	4/114	54/18352	0.000351541	0.00743257	0.00578853	ATP6V0D2/ATP6V1D/ATP6V1G2/TCIRG1	4
GO:0030552	cAMP binding	MF	3/114	23/18352	0.000377608	0.00745147	0.00580324	PDE2A/PDE4D/PRKAR2B	3
GO:0042625	ATPase-coupled ion transmembrane transporter activity	MF	4/114	58/18352	0.000462705	0.00855031	0.00665902	ATP6V0D2/ATP6V1D/ATP6V1G2/TCIRG1	4
GO:0004386	helicase activity	MF	6/114	160/18352	0.000491065	0.00855031	0.00665902	CHTF18/DNA2/HELLS/MCM4/PIF1/RAD51	6
GO:0004435	phosphatidylinositol phospholipase C activity	MF	3/114	26/18352	0.000546896	0.00884235	0.00688646	CCL5/PLCB2/PLCG2	3
GO:0008094	DNA-dependent ATPase activity	MF	5/114	108/18352	0.000567583	0.00884235	0.00688646	CHTF18/DNA2/MCM4/PIF1/RAD51	5
GO:0098636	protein complex involved in cell adhesion	CC	5/113	36/19559	1.92413e-06	0.000454095	0.000382801	CTLA4/ITGB2/JAM2/JAM3/LYN	5
GO:0098687	chromosomal region	CC	11/113	350/19559	5.88217e-06	0.00056088	0.00047282	CENPH/CENPI/DNA2/DYNC1LI2/ESCO2/HELLS/MCM4/NCAPD3/PIF1/PLK1/RAD51	11
GO:0042629	mast cell granule	CC	4/113	22/19559	7.12983e-06	0.00056088	0.00047282	BTK/CXCR2/LYN/RASGRP1	4
GO:0033176	proton-transporting V-type ATPase complex	CC	4/113	27/19559	1.67288e-05	0.000987002	0.00083204	ATP6V0D2/ATP6V1D/ATP6V1G2/TCIRG1	4
GO:0005720	nuclear heterochromatin	CC	4/113	34/19559	4.28497e-05	0.0020225	0.00170497	EME1/ESCO2/NCAPD3/UHRF1	4
GO:0000792	heterochromatin	CC	5/113	78/19559	8.88519e-05	0.00349484	0.00294614	EME1/ESCO2/HELLS/NCAPD3/UHRF1	5
GO:0000775	chromosome, centromeric region	CC	7/113	196/19559	0.000143743	0.00424292	0.00357677	CENPH/CENPI/DYNC1LI2/ESCO2/HELLS/NCAPD3/PLK1	7
GO:0016471	vacuolar proton-transporting V-type ATPase complex	CC	3/113	18/19559	0.000143828	0.00424292	0.00357677	ATP6V0D2/ATP6V1G2/TCIRG1	3
GO:0005721	pericentric heterochromatin	CC	3/113	20/19559	0.000199251	0.00522479	0.00440449	ESCO2/HELLS/NCAPD3	3
GO:0016469	proton-transporting two-sector ATPase complex	CC	4/113	52/19559	0.000230911	0.00544951	0.00459392	ATP6V0D2/ATP6V1D/ATP6V1G2/TCIRG1	4
GO:0000794	condensed nuclear chromosome	CC	5/113	103/19559	0.000328613	0.00705025	0.00594334	BRCA1/NCAPD3/NCAPH/PLK1/RAD51	5

## Sheet: Table S4
Table S4. KEGG enrichment details.
ID	Description	GeneRatio	BgRatio	pvalue	p.adjust	qvalue	geneID	Count
hsa05120	Epithelial cell signaling in Helicobacter pylori infection	20/65	70/8106	5.83554e-27	1.16711e-24	7.30978e-25	245972/51382/534/6352/2919/3576/3579/1956/50848/58494/83700/3725/4067/9020/5602/4233/4792/5336/10312/7082	20
hsa05323	Rheumatoid arthritis	11/65	93/8106	1.33383e-10	1.33383e-08	8.35397e-09	245972/51382/534/6348/6352/1493/2919/3576/3689/3725/10312	11
hsa04062	Chemokine signaling pathway	13/65	192/8106	2.74757e-09	1.83171e-07	1.14723e-07	6348/6352/2919/10563/3576/3579/643/4067/4792/5330/5336/10235/6772	13
hsa04380	Osteoclast differentiation	9/65	128/8106	6.9782e-07	3.4891e-05	2.18528e-05	695/2354/3725/11006/9020/5602/4792/5336/6772	9
hsa04621	NOD-like receptor signaling pathway	10/65	181/8106	1.48508e-06	5.94032e-05	3.72052e-05	6352/2919/3576/115361/115362/3725/5602/4792/5330/6772	10
hsa05110	Vibrio cholerae infection	6/65	50/8106	2.53397e-06	8.44658e-05	5.29023e-05	245972/51382/534/5336/10312/7082	6
hsa04662	B cell receptor signaling pathway	7/65	82/8106	3.62937e-06	0.000103696	6.49466e-05	695/3725/11006/4067/4792/5336/25780	7
hsa04061	Viral protein interaction with cytokine and cytokine receptor	7/65	100/8106	1.36464e-05	0.000284187	0.000177991	6348/6352/2919/10563/3576/3579/643	7
hsa05142	Chagas disease	7/65	102/8106	1.55463e-05	0.000284187	0.000177991	6348/6352/3576/3725/5602/4792/5330	7
hsa04064	NF-kappa B signaling pathway	7/65	104/8106	1.76602e-05	0.000284187	0.000177991	695/2919/3576/4067/9020/4792/5336	7
hsa04620	Toll-like receptor signaling pathway	7/65	104/8106	1.76602e-05	0.000284187	0.000177991	6348/6352/3576/3725/5602/4792/6772	7
hsa04660	T cell receptor signaling pathway	7/65	104/8106	1.76602e-05	0.000284187	0.000177991	1493/9402/3725/9020/5602/4792/10125	7
hsa04010	MAPK signaling pathway	11/65	294/8106	1.84722e-05	0.000284187	0.000177991	1956/3725/9020/5602/4233/4609/3164/5778/10125/10235/25780	11
hsa05167	Kaposi sarcoma-associated herpesvirus infection	9/65	193/8106	2.06149e-05	0.000294499	0.000184449	2919/3576/3725/4067/5602/4609/4792/5336/6772	9
hsa05169	Epstein-Barr virus infection	9/65	202/8106	2.96107e-05	0.00039481	0.000247276	695/3725/4067/9020/5602/4609/4792/5336/6772	9
hsa04670	Leukocyte transendothelial migration	7/65	114/8106	3.21221e-05	0.000401526	0.000251482	83692/50848/3689/58494/83700/5336/7070	7
hsa05417	Lipid and atherosclerosis	9/65	215/8106	4.83621e-05	0.000568966	0.000356352	6348/6352/2919/3576/3725/4067/5602/4792/5330	9
hsa04966	Collecting duct acid secretion	4/65	27/8106	5.75378e-05	0.000639309	0.000400409	245972/51382/534/10312	4
hsa05235	PD-L1 expression and PD-1 checkpoint pathway in cancer	6/65	89/8106	7.26166e-05	0.000764385	0.000478747	1956/27436/3725/4792/10125/6772	6
hsa04657	IL-17 signaling pathway	6/65	94/8106	9.86182e-05	0.000986182	0.000617661	2919/3576/2354/3725/5602/4792	6
hsa04933	AGE-RAGE signaling pathway in diabetic complications	6/65	100/8106	0.000139072	0.0013245	0.000829555	3576/3725/5602/5330/5336/6772	6
hsa04625	C-type lectin receptor signaling pathway	6/65	104/8106	0.000172661	0.00156965	0.000983095	3725/9020/5602/4792/5336/6772	6
hsa04668	TNF signaling pathway	6/65	112/8106	0.000258971	0.00225192	0.00141041	6352/2919/3725/9020/5602/4792	6
hsa05163	Human cytomegalovirus infection	8/65	225/8106	0.000401669	0.00334724	0.00209643	6348/6352/3576/3579/1956/4609/4792/5330	8
hsa04611	Platelet activation	6/65	124/8106	0.000448509	0.00358807	0.00224727	695/4067/5330/5336/10125/10235	6
hsa04012	ErbB signaling pathway	5/65	85/8106	0.000567711	0.004367	0.00273512	1956/3725/5602/4609/5336	5
hsa05131	Shigellosis	8/65	246/8106	0.000726296	0.00537997	0.00336956	6352/3576/1956/3725/5602/4792/5330/5336	8
hsa05132	Salmonella infection	8/65	249/8106	0.000786362	0.00561687	0.00351793	3576/1783/140735/79443/3725/5602/4609/4792	8
hsa05134	Legionellosis	4/65	57/8106	0.00108153	0.00745886	0.0046716	2919/3576/3689/4792	4
hsa04514	Cell adhesion molecules	6/65	149/8106	0.00117964	0.00786429	0.00492553	83692/1493/50848/3689/58494/83700	6
hsa04145	Phagosome	6/65	152/8106	0.00130757	0.00843594	0.00528356	245972/51382/534/1783/3689/10312	6
hsa05161	Hepatitis B	6/65	162/8106	0.00181203	0.0113252	0.00709315	3576/3725/5602/4609/4792/6772	6
hsa04664	Fc epsilon RI signaling pathway	4/65	68/8106	0.00208773	0.0126529	0.00792471	695/4067/5602/5336	4
hsa04530	Tight junction	6/65	169/8106	0.00224483	0.0128264	0.00803337	50848/58494/83700/3725/5602/7082	6
hsa05230	Central carbon metabolism in cancer	4/65	70/8106	0.00232259	0.0128264	0.00803337	1956/4233/4609/6510	4
hsa04060	Cytokine-cytokine receptor interaction	8/65	295/8106	0.00232505	0.0128264	0.00803337	657/6348/6352/2919/10563/3576/3579/643	8
hsa04014	Ras signaling pathway	7/65	232/8106	0.00243702	0.0128264	0.00803337	1956/5602/4233/5336/10125/10235/25780	7
hsa05171	Coronavirus disease - COVID-19	7/65	232/8106	0.00243702	0.0128264	0.00803337	3576/1956/3725/5602/4792/5336/6772	7
hsa05223	Non-small cell lung cancer	4/65	72/8106	0.00257507	0.0132055	0.00827081	1956/27436/4233/5336	4
hsa05133	Pertussis	4/65	76/8106	0.0031355	0.0152951	0.00957957	3576/3689/3725/5602	4
hsa05212	Pancreatic cancer	4/65	76/8106	0.0031355	0.0152951	0.00957957	1956/5602/5888/6772	4
hsa05140	Leishmaniasis	4/65	77/8106	0.00328762	0.0156554	0.0098052	3689/3725/4792/6772	4
hsa04721	Synaptic vesicle cycle	4/65	78/8106	0.00344471	0.0160219	0.0100348	245972/51382/534/10312	4
hsa04926	Relaxin signaling pathway	5/65	129/8106	0.00363651	0.0165296	0.0103528	1956/3725/5602/4792/5330	5
hsa03440	Homologous recombination	3/65	41/8106	0.00422155	0.0183546	0.0114958	672/146956/5888	3
hsa05219	Bladder cancer	3/65	41/8106	0.00422155	0.0183546	0.0114958	3576/1956/4609	3
hsa05130	Pathogenic Escherichia coli infection	6/65	197/8106	0.0047937	0.0203723	0.0127595	3576/3725/5602/4792/9632/7082	6
hsa05210	Colorectal cancer	4/65	86/8106	0.00488934	0.0203723	0.0127595	1956/3725/5602/4609	4
hsa04658	Th1 and Th2 cell differentiation	4/65	92/8106	0.00620755	0.025076	0.0157055	3725/5602/4792/6772	4
hsa04912	GnRH signaling pathway	4/65	93/8106	0.00644806	0.025076	0.0157055	1956/3725/5602/5330	4
hsa04072	Phospholipase D signaling pathway	5/65	148/8106	0.00650143	0.025076	0.0157055	3576/3579/1956/5330/5336	5
hsa04015	Rap1 signaling pathway	6/65	210/8106	0.00651977	0.025076	0.0157055	1956/3689/4233/5330/10235/25780	6
hsa05144	Malaria	3/65	50/8106	0.00737497	0.0278301	0.0174304	3576/3689/4233	3
hsa05166	Human T-cell leukemia virus 1 infection	6/65	219/8106	0.00795495	0.0294628	0.018453	3689/3725/9020/5602/4609/4792	6
hsa05146	Amoebiasis	4/65	102/8106	0.00889597	0.032349	0.0202607	2919/3576/3689/5330	4
hsa03460	Fanconi anemia pathway	3/65	54/8106	0.00912379	0.032585	0.0204085	672/146956/5888	3
hsa04659	Th17 cell differentiation	4/65	107/8106	0.0104871	0.036797	0.0230465	3725/5602/4792/6772	4
hsa05152	Tuberculosis	5/65	180/8106	0.0144101	0.0496899	0.0311216	245972/3689/5602/6772/10312	5

## Sheet: Table S5
Table S5. Differentially expressed lncRNAs in H.pylori infected gastric cancer tissues.
lncRNAid	name	baseMean	log2FoldChange	lfcSE	stat	pvalue
ENSG00000240990.8	HOXA11-AS	272.945	8.86233	1.39152	6.36881	1.9e-10
ENSG00000230316.5	FEZF1-AS1	444.737	8.17337	1.15558	7.07296	1.52e-12
ENSG00000225329.2	LHFPL3-AS2	437.083	7.26102	1.11027	6.53985	6.16e-11
ENSG00000244468.1	RP11-206M11.7	41.9889	7.16451	1.57119	4.55994	5.12e-06
ENSG00000274979.1	RP11-1143G9.5	575.33	7.08183	0.962149	7.36043	1.83e-13
ENSG00000251151.2	HOXC-AS3	68.6842	6.83902	1.41107	4.84669	1.26e-06
ENSG00000224271.4	RP11-191L9.4	45.0535	6.83541	1.61581	4.23032	2.33e-05
ENSG00000260597.1	AC012531.25	59.5581	6.81372	1.21986	5.58564	2.33e-08
ENSG00000228630.4	HOTAIR	254.3	6.73405	1.12881	5.96562	2.44e-09
ENSG00000243766.6	HOTTIP	470.701	6.70962	1.08446	6.18708	6.13e-10
ENSG00000229807.8	XIST	2804.57	6.68548	1.73078	3.86269	0.000112146
ENSG00000227619.1	RP11-492E3.2	250.068	6.40631	1.03646	6.18096	6.37e-10
ENSG00000270372.1	RP11-109M17.2	41.669	6.25551	1.65849	3.77181	0.000162067
ENSG00000249550.5	LINC01234	296.515	6.04557	1.35726	4.45425	8.42e-06
ENSG00000235621.7	LINC00494	126.902	6.02413	1.02404	5.88273	4.04e-09
ENSG00000254290.1	RP11-150O12.3	389.974	5.9902	1.09341	5.47846	4.29e-08
ENSG00000259974.2	LINC00261	1682	5.95569	1.11505	5.34117	9.23e-08
ENSG00000249746.1	RP11-254I22.3	18.644	5.76687	1.46537	3.93544	8.3e-05
ENSG00000204832.8	ST8SIA6-AS1	129.049	5.64387	1.77736	3.17543	0.00149616
ENSG00000197085.10	NPSR1-AS1	64.1652	5.62254	1.2213	4.60372	4.15e-06
ENSG00000230061.2	TRPM2-AS	297.717	5.60269	0.870769	6.43419	1.24e-10
ENSG00000257883.1	RP11-497G19.1	15.6718	5.42412	1.7761	3.05395	0.00225847
ENSG00000253187.2	HOXA10-AS	79.4402	5.41792	1.16644	4.64486	3.4e-06
ENSG00000249395.2	CASC9	351.887	5.39259	1.04424	5.16411	2.42e-07
ENSG00000263711.4	RP11-169F17.1	165.556	5.29671	1.7303	3.06115	0.00220491
ENSG00000214039.7	RP11-474D1.3	186.24	5.2557	1.64066	3.20341	0.0013581
ENSG00000251138.5	RP11-81H3.2	19.3954	5.11378	1.34695	3.79656	0.000146719
ENSG00000250874.1	CTC-480C2.1	15.2891	5.06087	1.97641	2.56063	0.0104481
ENSG00000271127.1	LL22NC03-N64E9.1	8.18076	5.02036	1.40929	3.56232	0.000367588
ENSG00000259672.1	RP11-69G7.1	3.56251	4.94961	1.7979	2.753	0.0059052
ENSG00000224167.1	RP3-522D1.1	44.2161	4.94692	0.891036	5.55188	2.83e-08
ENSG00000239335.4	LLPH-AS1	31.1753	4.93929	1.14031	4.33154	1.48e-05
ENSG00000229404.4	LINC00858	78.5741	4.9269	1.09535	4.49802	6.86e-06
ENSG00000254548.1	RP11-429J17.5	13.4009	4.9254	1.15357	4.2697	1.96e-05
ENSG00000241388.4	HNF1A-AS1	1992.83	4.92173	0.630084	7.81123	5.66e-15
ENSG00000229970.3	AC007128.1	69.3165	4.91289	0.99043	4.96036	7.04e-07
ENSG00000266869.1	RP6-114E22.1	18.0427	4.89999	1.59179	3.07828	0.00208197
ENSG00000260592.1	CTA-363E6.6	120.213	4.79651	0.675476	7.10094	1.24e-12
ENSG00000258884.1	CTD-3035D6.2	14.3415	4.78201	1.27383	3.75404	0.000174007
ENSG00000260803.1	Z84812.4	6.28501	4.67402	1.13063	4.13399	3.57e-05
ENSG00000275216.1	RP11-54H7.4	839.451	4.67031	1.33483	3.4988	0.000467361
ENSG00000253666.1	KB-1615E4.2	12.9822	4.66871	1.43118	3.26213	0.00110579
ENSG00000249001.4	RP11-742B18.1	21.5277	4.65665	1.51551	3.07267	0.00212154
ENSG00000235142.6	RP1-60O19.1	330.388	4.64816	1.04032	4.468	7.9e-06
ENSG00000230426.2	ERVMER61-1	15.0228	4.64448	2.3213	2.00081	0.0454131
ENSG00000272068.1	RP11-284F21.9	368.469	4.63855	0.840868	5.51638	3.46e-08
ENSG00000272763.1	RP11-357H14.17	970.567	4.62137	0.78667	5.8746	4.24e-09
ENSG00000228709.1	AP001065.15	166.002	4.57195	0.955806	4.78335	1.72e-06
ENSG00000241280.1	RP11-221J22.2	3.48842	4.5113	1.42277	3.17079	0.00152023
ENSG00000228705.1	LINC00659	80.1689	4.48427	0.964637	4.64866	3.34e-06
ENSG00000256146.1	RP11-319E16.2	14.3534	4.43396	1.57785	2.81013	0.00495215
ENSG00000258867.4	LINC01146	52.5662	4.42423	1.0486	4.21916	2.45e-05
ENSG00000272405.1	RP11-284F21.10	1311.44	4.41825	0.724631	6.09724	1.08e-09
ENSG00000272189.1	RP3-325F22.5	256.966	4.36055	0.619787	7.03556	1.98e-12
ENSG00000225506.2	CYP4A22-AS1	26	4.35609	0.85899	5.07117	3.95e-07
ENSG00000229953.1	RP11-284F21.7	452.603	4.33637	0.720058	6.02226	1.72e-09
ENSG00000258630.1	RP11-725G5.2	5.49769	4.30692	1.2586	3.42199	0.000621643
ENSG00000248362.1	CTC-327F10.5	4.86979	4.28714	1.6642	2.5761	0.00999214
ENSG00000146666.5	LINC00525	17.837	4.25496	0.892229	4.76891	1.85e-06
ENSG00000231806.2	PCAT7	135.648	4.17779	0.668118	6.25308	4.02e-10
ENSG00000264448.3	RP3-388N13.5	4.30543	4.13966	1.17743	3.51583	0.000438383
ENSG00000227674.1	LINC00355	53.4745	4.13841	1.7145	2.41377	0.0157886
ENSG00000224899.1	RP11-3B12.5	13.5673	4.10771	1.81816	2.25926	0.023867
ENSG00000254166.1	CASC19	79.5369	4.07792	0.874879	4.66113	3.14e-06
ENSG00000232850.3	PTGES2-AS1	50.4229	4.06998	0.845879	4.81154	1.5e-06
ENSG00000249413.2	RP11-25H12.1	8.43962	4.0504	1.74746	2.31787	0.0204563
ENSG00000214797.3	RP11-1036E20.9	4.14007	4.0453	1.40737	2.87437	0.0040483
ENSG00000260604.2	RP1-140K8.5	253.272	3.97942	0.982579	4.04997	5.12e-05
ENSG00000236347.1	RP11-346D19.1	16.8695	3.96437	1.38406	2.8643	0.00417928
ENSG00000261520.4	DLGAP1-AS5	189.816	3.94404	1.50367	2.62294	0.0087175
ENSG00000232555.1	AC104088.1	25.6099	3.94257	1.06623	3.69767	0.000217588
ENSG00000250337.4	LINC01021	113.852	3.9017	1.28181	3.04391	0.00233528
ENSG00000254560.4	BBOX1-AS1	251.541	3.89399	0.74197	5.24817	1.54e-07
ENSG00000197308.7	GATA3-AS1	4.95753	3.86342	1.44597	2.67185	0.00754344
ENSG00000270190.1	RP11-803D5.4	39.6785	3.84062	0.676584	5.67649	1.37e-08
ENSG00000270977.1	AC015849.16	88.2728	3.79753	0.727613	5.21917	1.8e-07
ENSG00000254094.1	AC078852.1	3.84576	3.77374	1.17266	3.21809	0.00129048
ENSG00000233532.4	LINC00460	27.5041	3.76994	0.985869	3.82397	0.000131317
ENSG00000260156.1	RP11-394B2.6	4.32236	3.73823	1.17356	3.18536	0.00144573
ENSG00000226738.1	CTA-384D8.31	21.8184	3.7327	1.04411	3.575	0.000350229
ENSG00000237361.2	TUSC8	47.3119	3.71672	1.40586	2.64373	0.00819973
ENSG00000244332.1	RP11-119K6.6	6.52007	3.70632	1.055	3.51308	0.000442944
ENSG00000266088.4	RP5-1028K7.2	37.6566	3.70233	0.805889	4.59409	4.35e-06
ENSG00000233539.4	AC011294.3	12.7355	3.68141	1.35603	2.71485	0.00663063
ENSG00000255441.1	CTD-2616J11.2	6.10099	3.67816	1.23311	2.98283	0.00285599
ENSG00000237424.1	FOXD2-AS1	506.791	3.66389	0.514602	7.11984	1.08e-12
ENSG00000237978.4	KCNMB2-AS1	114.737	3.6548	1.05635	3.45984	0.000540493
ENSG00000224559.2	LINC01087	22.8044	3.63885	1.59988	2.27445	0.0229392
ENSG00000273112.1	RP11-25K21.6	1.88266	3.6046	1.46519	2.46016	0.0138876
ENSG00000224050.1	RP1-90G24.6	19.3988	3.59689	0.927583	3.87771	0.000105446
ENSG00000234449.2	RP11-706O15.3	141.216	3.57272	1.29963	2.74903	0.00597716
ENSG00000272620.1	AFAP1-AS1	3822.98	3.56005	1.23607	2.88015	0.00397489
ENSG00000237686.5	RP5-1120P11.1	232.084	3.55399	0.901347	3.94298	8.05e-05
ENSG00000281406.1	BLACAT1	368.263	3.52974	0.730061	4.83485	1.33e-06
ENSG00000213468.3	FIRRE	77.1131	3.51688	0.857068	4.10339	4.07e-05
ENSG00000189238.5	LINC00943	25.4073	3.48704	0.869521	4.0103	6.06e-05
ENSG00000230479.1	AP000695.6	37.3536	3.48645	0.735527	4.74007	2.14e-06
ENSG00000264859.4	DSG2-AS1	51.7514	3.45623	0.770349	4.48657	7.24e-06
ENSG00000223552.1	RP11-24F11.2	89.8629	3.42824	0.685167	5.0035	5.63e-07
ENSG00000231131.5	LINC01468	7.14717	3.41923	1.615	2.11717	0.0342453
ENSG00000258760.1	CTD-2509G16.5	20.2492	3.41599	0.835849	4.08685	4.37e-05
ENSG00000272088.1	RP11-168F9.2	28.0488	3.41046	0.81625	4.17821	2.94e-05
ENSG00000236352.1	AC005220.3	2.30217	3.40499	1.277	2.66639	0.00766699
ENSG00000232347.1	RP11-488L18.8	2.22589	3.40437	1.05059	3.24044	0.00119346
ENSG00000274080.1	CTA-315H11.2	87.948	3.40242	0.870717	3.90761	9.32e-05
ENSG00000277352.1	KB-68A7.2	9.47695	3.36983	1.25903	2.67653	0.00743897
ENSG00000272872.1	LL22NC03-N14H11.1	17.396	3.36948	1.15923	2.90665	0.00365324
ENSG00000272473.1	AC006273.4	13.9057	3.3362	0.883535	3.77597	0.000159389
ENSG00000236499.2	LINC00896	56.94	3.33228	0.72148	4.61868	3.86e-06
ENSG00000225953.2	SATB2-AS1	24.1923	3.31766	0.944833	3.51138	0.000445795
ENSG00000238164.5	RP3-395M20.8	870.789	3.31565	0.507843	6.5289	6.63e-11
ENSG00000274001.1	RP11-5G9.5	9.63976	3.30719	0.900693	3.67183	0.000240824
ENSG00000259772.5	RP11-16E12.2	180.93	3.29449	0.670747	4.91167	9.03e-07
ENSG00000225062.1	CATIP-AS1	8.93026	3.28637	0.953831	3.44545	0.000570117
ENSG00000271969.1	U47924.29	7.03086	3.2844	0.96165	3.41538	0.00063694
ENSG00000257264.3	MIR3179-1	1.62051	3.26946	1.23292	2.6518	0.00800649
ENSG00000225489.5	RP11-390F4.3	334.678	3.26695	0.731744	4.4646	8.02e-06
ENSG00000250584.2	LINC01511	9.33572	3.24998	1.58674	2.04822	0.0405385
ENSG00000256443.1	RP11-794G24.1	31.1484	3.24442	1.14494	2.8337	0.0046012
ENSG00000248844.5	RP11-626H12.3	16.3357	3.23828	1.07238	3.01972	0.00253007
ENSG00000279712.1	CTA-280A3.2	27.4276	3.22501	1.33474	2.4162	0.0156833
ENSG00000271384.1	RP11-435O5.7	24.0196	3.22019	0.707646	4.55057	5.35e-06
ENSG00000261211.1	RP1-80N2.3	93.2141	3.20963	0.563124	5.69968	1.2e-08
ENSG00000270933.1	CTD-2227E11.1	52.3428	3.20907	0.724266	4.43079	9.39e-06
ENSG00000182912.6	TSPEAR-AS2	221.296	3.18808	0.744397	4.28276	1.85e-05
ENSG00000236283.2	AC013463.2	45.5562	3.18653	0.886344	3.59514	0.000324213
ENSG00000260757.1	RP11-120K18.2	10.6771	3.17941	1.10053	2.88898	0.00386499
ENSG00000261488.1	RP11-757F18.5	141.175	3.14583	0.557796	5.63975	1.7e-08
ENSG00000235532.1	LINC00402	18.3501	3.07758	1.20308	2.55808	0.010525
ENSG00000246228.5	CASC8	135.515	3.07471	0.779298	3.94549	7.96e-05
ENSG00000225783.5	MIAT	478.357	3.07146	0.632023	4.85973	1.18e-06
ENSG00000234377.6	RNF219-AS1	15.2642	3.0471	0.824763	3.69452	0.000220303
ENSG00000235884.3	LINC00941	158.519	3.03815	0.933326	3.25519	0.00113318
ENSG00000280734.1	LINC01232	658.358	3.03384	0.452639	6.70255	2.05e-11
ENSG00000224715.1	CITF22-49D8.1	3.60191	3.03178	1.44003	2.10535	0.0352606
ENSG00000224995.1	LINC01526	1.56154	3.01213	1.40519	2.14358	0.0320667
ENSG00000234883.3	MIR155HG	134.631	3.00662	0.598454	5.02397	5.06e-07
ENSG00000270066.3	SCARNA2	4.54852	2.99541	1.16746	2.56576	0.0102951
ENSG00000238121.4	LINC00426	118.505	2.98182	0.656241	4.54379	5.53e-06
ENSG00000214999.3	AC129492.6	54.8909	2.97972	0.933453	3.19215	0.00141218
ENSG00000269416.4	LINC01224	315.221	2.96164	0.858914	3.44812	0.000564496
ENSG00000261713.5	SSTR5-AS1	170.398	2.91418	1.33187	2.18803	0.0286675
ENSG00000259647.1	RP11-143J24.1	4.88785	2.90375	0.934359	3.10775	0.0018852
ENSG00000206337.9	HCP5	4146.08	2.89437	0.504963	5.73184	9.93e-09
ENSG00000273837.1	LLNLR-470E3.1	25.4748	2.89349	0.916215	3.15809	0.00158804
ENSG00000270919.1	RP11-379K22.3	33.7084	2.89181	1.04964	2.75505	0.00586823
ENSG00000257636.5	RP11-1103G16.1	26.7843	2.88298	1.33376	2.16154	0.0306534
ENSG00000249007.1	RP11-510N19.5	191.577	2.87453	0.590633	4.86687	1.13e-06
ENSG00000239322.1	ATP6V1B1-AS1	3.23252	2.85864	1.3871	2.06088	0.0393141
ENSG00000235280.2	MCF2L-AS1	224.878	2.85561	0.652537	4.37616	1.21e-05
ENSG00000258837.1	CTD-2566J3.1	89.8495	2.83946	1.09325	2.59725	0.00939728
ENSG00000271989.1	RP4-736L20.3	2.8149	2.83792	1.22643	2.31396	0.0206698
ENSG00000204588.5	LINC01123	168.563	2.82799	0.481595	5.87212	4.3e-09
ENSG00000256128.4	LINC00944	57.7279	2.79099	0.763459	3.65572	0.000256463
ENSG00000256540.1	RP11-598F7.6	38.383	2.78584	0.65975	4.22257	2.42e-05
ENSG00000272711.1	RP11-259N19.1	76.8172	2.78421	0.572594	4.86245	1.16e-06
ENSG00000273272.1	CTA-384D8.34	12.5419	2.78331	0.794944	3.50126	0.00046306
ENSG00000251665.1	RP11-700H6.2	2.40379	2.76371	1.1707	2.36074	0.0182387
ENSG00000215866.6	LINC01356	50.4842	2.76176	0.731067	3.77771	0.000158275
ENSG00000260997.1	RP4-647J21.1	79.4	2.74629	0.599062	4.58431	4.55e-06
ENSG00000206195.9	DUXAP8	350.053	2.73632	0.840826	3.25432	0.00113664
ENSG00000235834.1	RP1-60N8.1	2.63219	2.73064	1.25552	2.17491	0.0296368
ENSG00000269974.1	RP11-932O9.10	34.0544	2.72461	0.572713	4.75739	1.96e-06
ENSG00000232874.1	RP11-135A1.2	27.7562	2.71847	0.842007	3.22856	0.00124414
ENSG00000273162.1	RP11-108L7.15	57.0977	2.71068	0.535541	5.06158	4.16e-07
ENSG00000270019.1	RP11-141B14.1	16.7301	2.69329	0.676106	3.98354	6.79e-05
ENSG00000255394.4	C8orf49	118.631	2.68187	0.854012	3.14032	0.00168765
ENSG00000267751.4	AC009005.2	148.155	2.65717	0.673825	3.94342	8.03e-05
ENSG00000177335.9	C8orf31	368.089	2.65122	0.854048	3.1043	0.00190733
ENSG00000257702.3	LBX2-AS1	1122.8	2.64446	0.415119	6.37036	1.89e-10
ENSG00000261618.1	RP11-79H23.3	128.377	2.6433	0.684918	3.85929	0.000113718
ENSG00000262172.1	CTD-2529O21.1	18.6253	2.62359	0.760174	3.45131	0.000557881
ENSG00000277840.1	RP11-103B5.4	37.2288	2.61416	0.683661	3.82376	0.000131432
ENSG00000236662.1	RP11-108L7.4	18.0509	2.6037	0.703321	3.70202	0.000213894
ENSG00000224885.1	TSSC1-IT1	5.92563	2.59264	0.969052	2.67544	0.00746308
ENSG00000257219.4	RP11-54A9.1	10.8339	2.59096	0.876746	2.9552	0.00312468
ENSG00000275437.1	RP5-908M14.10	127.222	2.58773	0.537408	4.81521	1.47e-06
ENSG00000261373.1	VPS9D1-AS1	838.884	2.58323	0.605447	4.26665	1.98e-05
ENSG00000261430.1	LA16c-390E6.3	1.86148	2.58172	1.14241	2.25988	0.0238286
ENSG00000222033.1	LINC01124	104.206	2.57726	0.794748	3.24287	0.00118332
ENSG00000278385.1	RP11-89H19.2	89.0276	2.5698	0.634704	4.04882	5.15e-05
ENSG00000266709.1	RP11-214O1.2	39.5011	2.56778	0.806949	3.18209	0.00146215
ENSG00000254756.1	RP11-867G23.12	12.272	2.56456	0.710531	3.60935	0.000306961
ENSG00000272502.1	RP11-713M15.2	186.009	2.56013	0.863212	2.96581	0.00301883
ENSG00000232884.6	AF127936.3	10.0053	2.5475	0.833866	3.05505	0.00225021
ENSG00000262319.1	CTC-457L16.2	11.0839	2.54539	1.0304	2.47029	0.0135003
ENSG00000267892.1	CTD-2540F13.2	96.5462	2.54426	0.631358	4.02982	5.58e-05
ENSG00000271590.1	RP11-181E10.3	20.0789	2.52862	0.605959	4.17292	3.01e-05
ENSG00000274849.1	RP11-49I11.4	50.3569	2.51221	0.516327	4.86554	1.14e-06
ENSG00000268027.4	AC006129.2	59.9603	2.50143	0.704094	3.55269	0.000381315
ENSG00000271936.1	RP11-443B20.1	112.607	2.49965	0.418522	5.97257	2.34e-09
ENSG00000262979.1	CTD-2047H16.2	64.9413	2.49102	0.593137	4.19973	2.67e-05
ENSG00000264672.4	SEPT4-AS1	20.7936	2.4866	0.483951	5.13812	2.78e-07
ENSG00000203999.7	LINC01270	79.0194	2.47835	0.734979	3.372	0.000746253
ENSG00000281706.1	LINC01012	63.9177	2.4707	0.675992	3.65492	0.00025726
ENSG00000175772.10	LINC01106	171.535	2.46926	0.519677	4.75152	2.02e-06
ENSG00000231566.1	RP5-1158E12.3	41.3806	2.46667	0.616906	3.99846	6.38e-05
ENSG00000266651.1	RP11-138I1.3	33.995	2.46312	0.496989	4.95609	7.19e-07
ENSG00000257084.1	U47924.27	146.613	2.46242	0.541336	4.54877	5.4e-06
ENSG00000247982.5	LINC00926	278.587	2.4465	0.726798	3.36614	0.000762282
ENSG00000236935.1	AP003774.1	18.5241	2.4312	0.858952	2.83042	0.00464868
ENSG00000197301.6	RP11-366L20.2	100.974	2.42978	0.714159	3.4023	0.000668217
ENSG00000254231.1	CTD-2284J15.1	88.394	2.41327	0.592346	4.07409	4.62e-05
ENSG00000249096.5	RP11-290F5.1	126.425	2.39622	0.730417	3.28061	0.00103581
ENSG00000259343.4	TMC3-AS1	26.6491	2.39491	0.597377	4.00904	6.1e-05
ENSG00000204860.4	FAM201A	203.095	2.38434	0.790723	3.0154	0.00256643
ENSG00000176912.3	TYMSOS	162.974	2.38121	0.602988	3.94901	7.85e-05
ENSG00000180861.8	LINC01559	1308.84	2.37791	0.857743	2.77229	0.00556631
ENSG00000261546.1	CTD-2555A7.3	13.6284	2.3582	0.68826	3.42633	0.000611807
ENSG00000222032.1	AC112721.2	8.46349	2.3494	1.0261	2.28964	0.0220422
ENSG00000261786.1	RP4-555D20.2	25.6181	2.33944	1.13326	2.06434	0.0389852
ENSG00000237513.1	RP11-325F22.2	63.7992	2.33354	0.752211	3.10225	0.00192059
ENSG00000242258.1	LINC00996	66.0245	2.32742	0.651372	3.5731	0.000352782
ENSG00000260196.1	RP1-239B22.5	526.537	2.32445	0.602495	3.85804	0.000114301
ENSG00000259723.1	RP5-823G15.5	26.2433	2.30815	0.955714	2.41511	0.0157307
ENSG00000246790.2	RP11-730K11.1	11.7104	2.30047	0.809683	2.8412	0.00449439
ENSG00000228203.5	RNF144A-AS1	56.3708	2.28774	0.704754	3.24616	0.00116975
ENSG00000277701.3	RP11-734K23.9	4.0755	2.28614	0.960148	2.38103	0.0172643
ENSG00000259953.1	RP11-4O1.2	410.333	2.27367	0.344034	6.60887	3.87e-11
ENSG00000233203.5	RP11-67L3.4	12.968	2.26711	0.70692	3.20702	0.00134118
ENSG00000237993.1	RP11-159M11.2	4.77262	2.25527	1.05502	2.13765	0.0325448
ENSG00000228863.7	RP11-404F10.2	14.6082	2.25494	0.722517	3.12095	0.00180266
ENSG00000261613.2	RP11-20I23.13	12.6472	2.24368	0.913877	2.45512	0.0140836
ENSG00000226806.1	AC011893.3	4.70545	2.23495	1.0946	2.0418	0.0411718
ENSG00000246740.2	PLA2G4E-AS1	9.33732	2.23412	1.01947	2.19146	0.0284187
ENSG00000234203.1	RP5-1050D4.2	5.07368	2.22999	0.811825	2.74688	0.00601653
ENSG00000281103.1	TRG-AS1	127.036	2.22943	0.614779	3.62639	0.00028741
ENSG00000234899.8	SOX9-AS1	89.8668	2.22671	0.572108	3.89211	9.94e-05
ENSG00000237638.1	AC007386.2	15.6246	2.21684	0.968283	2.28945	0.0220533
ENSG00000272817.1	RP11-402D21.2	7.07771	2.21256	0.813809	2.71878	0.00655236
ENSG00000187621.13	TCL6	51.0487	2.21204	1.11134	1.99043	0.0465432
ENSG00000269951.1	RP11-797A18.6	80.4553	2.20019	0.532105	4.13489	3.55e-05
ENSG00000235483.1	GYG2-AS1	1.56443	2.19377	1.11799	1.96224	0.0497341
ENSG00000276390.1	RP1-197B17.5	35.601	2.1893	0.51255	4.2714	1.94e-05
ENSG00000162888.4	C1orf147	31.5731	2.18609	0.537655	4.06597	4.78e-05
ENSG00000215246.5	RP11-43F13.3	41.257	2.183	0.81938	2.66421	0.00771704
ENSG00000261971.5	MMP25-AS1	617.295	2.17052	0.439008	4.94413	7.65e-07
ENSG00000236790.4	LINC00299	36.8666	2.16224	0.583186	3.70763	0.000209207
ENSG00000260711.2	RP11-747H7.3	581.737	2.16165	0.507924	4.25586	2.08e-05
ENSG00000255468.5	RP11-867G23.8	532.054	2.15139	0.549021	3.91859	8.91e-05
ENSG00000229425.1	AJ006998.2	7.83622	2.14333	0.834912	2.56713	0.0102544
ENSG00000270605.1	RP5-1092A3.4	118.79	2.14314	0.466517	4.59393	4.35e-06
ENSG00000234705.1	HMGA1P4	39.5324	2.13765	0.608281	3.51424	0.000441012
ENSG00000263080.1	RP11-485G7.5	20.8557	2.12949	0.648245	3.28501	0.00101979
ENSG00000225205.4	AC093818.1	206.509	2.12946	0.406592	5.23733	1.63e-07
ENSG00000258593.2	CTD-3051D23.4	34.7306	2.12587	0.535624	3.96897	7.22e-05
ENSG00000272720.1	CTA-228A9.3	157.273	2.12531	0.442282	4.80534	1.54e-06
ENSG00000262714.1	RP11-44F14.8	168.938	2.11037	0.76115	2.77261	0.00556091
ENSG00000253395.1	KB-1460A1.1	22.5587	2.11018	0.62082	3.39901	0.000676291
ENSG00000234771.3	SLC25A25-AS1	2298.64	2.10555	0.456437	4.613	3.97e-06
ENSG00000214248.2	CTD-3193O13.12	22.1609	2.08571	0.581111	3.58918	0.000331721
ENSG00000224903.1	AC005534.8	13.2771	2.07931	0.689454	3.01589	0.0025623
ENSG00000260552.1	RP11-49I11.1	66.1245	2.07541	0.571308	3.63273	0.000280434
ENSG00000267149.2	CTC-550B14.6	14.1603	2.06567	0.746722	2.76631	0.00566938
ENSG00000225684.3	FAM225B	14.6489	2.06344	0.692572	2.97938	0.00288829
ENSG00000236559.1	RP11-243J16.7	19.414	2.04686	0.652052	3.1391	0.00169466
ENSG00000272264.1	RP11-92K15.3	62.8328	2.04135	0.657336	3.10548	0.00189967
ENSG00000274191.1	RP11-324E6.10	13.5145	2.04049	0.672074	3.03611	0.00239655
ENSG00000260593.1	RP11-432I5.2	12.095	2.0175	0.76081	2.65179	0.00800673
ENSG00000271781.1	CTD-2589H19.6	98.0721	2.0141	0.662899	3.03832	0.00237897
ENSG00000275097.1	RP11-627K11.6	14.3494	2.01348	0.609101	3.30566	0.000947525
ENSG00000180712.3	RP11-290F5.2	45.2511	2.00902	0.604522	3.32331	0.000889549
ENSG00000227630.2	LINC01132	48.9725	2.00159	0.551281	3.6308	0.000282539
ENSG00000253174.2	RP11-360L9.7	3.0746	1.99542	0.980569	2.03496	0.0418551
ENSG00000253438.2	PCAT1	39.0662	1.99386	0.583429	3.41749	0.000632018
ENSG00000255843.1	AP000593.7	10.6692	1.97714	0.840607	2.35204	0.0186709
ENSG00000254815.4	RP11-496I9.1	174.983	1.97361	0.655699	3.00993	0.00261308
ENSG00000254389.3	RHPN1-AS1	103.875	1.97198	0.620615	3.17746	0.00148572
ENSG00000235366.2	LINC01055	11.0596	1.97151	0.888366	2.21926	0.026469
ENSG00000238045.8	AC009133.12	677.577	1.9638	0.450314	4.36095	1.29e-05
ENSG00000132832.8	LINC01260	51.0282	1.96156	0.897176	2.18637	0.0287885
ENSG00000213599.8	SLX1A-SULT1A3	21.3071	1.95982	0.515412	3.80243	0.000143284
ENSG00000276116.2	FUT8-AS1	65.3474	1.95878	0.585126	3.34763	0.00081506
ENSG00000227036.5	LINC00511	1652.18	1.95551	0.546075	3.58103	0.000342245
ENSG00000278192.1	RP5-1056H1.2	166.37	1.93192	0.576802	3.34935	0.000810001
ENSG00000246582.2	RP11-1149O23.3	249.302	1.92812	0.510947	3.77362	0.000160899
ENSG00000265206.3	RP5-1171I10.5	107.373	1.92491	0.702562	2.73985	0.00614681
ENSG00000266783.1	RP11-715F3.2	36.081	1.92355	0.441502	4.35684	1.32e-05
ENSG00000235726.4	AC010148.1	26.4528	1.92317	0.646208	2.97609	0.00291953
ENSG00000231439.4	WASIR2	21.6301	1.9223	0.78975	2.43407	0.0149303
ENSG00000232445.1	RP11-132A1.4	157.777	1.92192	0.760852	2.52601	0.0115365
ENSG00000259834.1	RP11-284N8.3	274.378	1.91705	0.776297	2.46948	0.013531
ENSG00000254419.1	RP11-261P9.4	27.7899	1.91159	0.556562	3.43463	0.000593359
ENSG00000229832.1	RP11-384C4.2	26.4801	1.90994	0.680454	2.80687	0.00500258
ENSG00000275162.1	LLNLR-260G6.1	17.8072	1.89517	0.761646	2.48826	0.012837
ENSG00000262837.1	RP11-304F15.7	4.85439	1.88329	0.897468	2.09844	0.0358659
ENSG00000246334.2	PRR7-AS1	77.0668	1.87652	0.459585	4.08307	4.44e-05
ENSG00000236953.1	ZDHHC20-IT1	17.603	1.87008	0.529378	3.53259	0.000411507
ENSG00000276672.1	RP11-142E9.1	159.385	1.85114	0.439631	4.21067	2.55e-05
ENSG00000262251.1	RP11-199F11.2	81.6574	1.84918	0.387681	4.76985	1.84e-06
ENSG00000229334.1	AC046143.3	60.3852	1.84626	0.442304	4.17418	2.99e-05
ENSG00000233098.7	CCDC144NL-AS1	204.014	1.84252	0.904436	2.0372	0.0416298
ENSG00000262468.4	LINC01569	140.077	1.83253	0.442494	4.14137	3.45e-05
ENSG00000272931.1	RP5-943J3.2	30.4	1.83077	0.542589	3.37414	0.000740454
ENSG00000273341.1	RP5-899E9.1	13.55	1.82676	0.612669	2.98164	0.00286706
ENSG00000257298.1	RP3-405J10.3	151.51	1.81819	0.465102	3.90923	9.26e-05
ENSG00000244184.1	RP11-314A20.2	18.0537	1.80506	0.700731	2.57596	0.00999608
ENSG00000231607.7	DLEU2	541.317	1.79066	0.429009	4.17393	2.99e-05
ENSG00000267130.1	CTD-2540B15.9	8.62885	1.78967	0.882227	2.02858	0.0425015
ENSG00000255559.1	ZNF252P-AS1	48.0361	1.78725	0.479738	3.72547	0.000194952
ENSG00000234949.2	AC104667.3	71.0449	1.78562	0.547149	3.26349	0.00110049
ENSG00000204282.4	TNRC6C-AS1	390.901	1.78357	0.402669	4.42936	9.45e-06
ENSG00000254154.7	RP4-798P15.3	138.012	1.78353	0.529093	3.37092	0.000749178
ENSG00000239791.1	AC002310.7	8.71135	1.76845	0.807569	2.18984	0.0285357
ENSG00000260807.5	RP11-161M6.2	246.229	1.76572	0.822143	2.1477	0.0317374
ENSG00000236377.1	AC084809.3	5.66027	1.76502	0.881832	2.00154	0.0453347
ENSG00000272821.1	CTA-384D8.36	189.903	1.72693	0.414595	4.16536	3.11e-05
ENSG00000276272.1	RP11-121C6.5	9.57048	1.72278	0.796359	2.16332	0.0305164
ENSG00000227695.4	DNMBP-AS1	181.535	1.71663	0.491894	3.48984	0.000483316
ENSG00000274536.3	RP6-159A1.4	82.4655	1.71346	0.758109	2.26018	0.0238104
ENSG00000255970.1	RP11-43N5.1	19.742	1.70156	0.662487	2.56844	0.0102157
ENSG00000269275.1	CTD-2105E13.15	16.2536	1.67228	0.734404	2.27706	0.0227824
ENSG00000272301.1	RP11-111M22.4	23.3339	1.67046	0.624213	2.67611	0.00744827
ENSG00000275481.1	RP11-474P2.6	27.0099	1.66275	0.496124	3.35149	0.000803792
ENSG00000254973.1	RP11-429J17.7	69.2822	1.66199	0.583277	2.8494	0.00438018
ENSG00000248240.1	RP11-159F24.5	7.31961	1.66112	0.768554	2.16136	0.0306672
ENSG00000179082.3	C9orf106	15.373	1.6594	0.836509	1.98372	0.047287
ENSG00000227375.4	DLG1-AS1	14.7547	1.65487	0.790814	2.09261	0.0363838
ENSG00000261061.1	RP11-303E16.2	501.837	1.65165	0.456542	3.61774	0.000297185
ENSG00000251301.5	RP11-81H14.2	72.8737	1.6491	0.83956	1.96425	0.0495017
ENSG00000261476.1	RP11-77K12.3	8.69058	1.64637	0.681593	2.41548	0.0157146
ENSG00000205885.6	C1RL-AS1	422.798	1.64284	0.354464	4.63471	3.57e-06
ENSG00000259926.1	RP11-44F14.5	12.033	1.64234	0.684533	2.39921	0.0164306
ENSG00000274270.1	RP11-34F20.7	19.813	1.64022	0.539568	3.03988	0.00236673
ENSG00000277879.1	RP11-129M16.4	202.695	1.63921	0.57917	2.83027	0.00465091
ENSG00000269937.1	RP11-20I23.8	23.1123	1.63422	0.580414	2.81561	0.00486848
ENSG00000236137.1	RP11-27K13.3	47.3434	1.63335	0.453175	3.60424	0.000313067
ENSG00000196366.3	C9orf163	39.7895	1.63142	0.537501	3.0352	0.00240377
ENSG00000227388.2	RP11-112J3.16	53.019	1.62381	0.457367	3.55035	0.000384726
ENSG00000275092.1	LA16c-329F2.2	11.1614	1.62058	0.571076	2.83777	0.00454302
ENSG00000225361.3	PPP1R26-AS1	147.758	1.61772	0.47452	3.40917	0.000651614
ENSG00000257167.2	TMPO-AS1	311.553	1.60899	0.4228	3.80556	0.000141482
ENSG00000263477.1	RP11-338L22.2	10.0605	1.59587	0.675536	2.36237	0.0181584
ENSG00000243224.1	RP5-1157M23.2	20.145	1.59237	0.550539	2.89238	0.00382334
ENSG00000237903.1	RP3-404F18.5	35.9592	1.58798	0.496415	3.1989	0.00137955
ENSG00000215417.9	MIR17HG	131.769	1.58742	0.566604	2.80163	0.00508445
ENSG00000272980.3	RP11-517H2.6	27.0105	1.58065	0.475799	3.3221	0.000893421
ENSG00000254034.1	RP11-662B19.2	9.33374	1.57379	0.685532	2.29571	0.0216922
ENSG00000248773.1	RP11-231L11.3	15.9444	1.57254	0.528188	2.97723	0.00290868
ENSG00000275560.1	RP11-180M15.7	41.0867	1.57089	0.432427	3.63272	0.000280454
ENSG00000229109.1	RP11-439K3.1	8.38202	1.56736	0.796977	1.96663	0.0492264
ENSG00000241886.1	RP11-242C19.2	27.0225	1.55325	0.637437	2.43671	0.0148216
ENSG00000270823.1	RP11-2E11.6	16.0661	1.54617	0.552743	2.79727	0.00515362
ENSG00000231528.2	FAM225A	20.2233	1.54551	0.611231	2.52853	0.0114543
ENSG00000274554.1	RP11-240G22.5	26.2743	1.53843	0.415768	3.70021	0.000215425
ENSG00000249859.6	PVT1	1099.51	1.53587	0.465437	3.29984	0.000967392
ENSG00000196167.8	COLCA1	1081	1.51023	0.696243	2.16911	0.0300744
ENSG00000260470.1	RP11-834C11.11	24.3484	1.50891	0.706285	2.13641	0.0326463
ENSG00000250608.1	RP11-933H2.4	56.1027	1.5017	0.545498	2.7529	0.00590707
ENSG00000236682.1	AC068282.3	112.436	1.49846	0.497721	3.01064	0.00260694
ENSG00000255182.2	CTD-2517M22.14	151.654	1.49383	0.447126	3.34097	0.000834873
ENSG00000205664.9	RP11-706O15.1	614.841	1.49219	0.454653	3.28205	0.00103056
ENSG00000263786.1	RP11-649A18.4	64.8672	1.48023	0.471521	3.13928	0.00169365
ENSG00000269821.1	KCNQ1OT1	3247.82	1.4729	0.55168	2.66984	0.00758882
ENSG00000281404.1	LINC01176	65.5938	1.47206	0.429415	3.42806	0.00060792
ENSG00000272205.1	RP11-277B15.3	28.5637	1.47027	0.469293	3.13294	0.00173064
ENSG00000226751.2	AF127936.5	13.9478	1.46441	0.702098	2.08576	0.0370008
ENSG00000267383.5	CTC-260E6.6	101.685	1.46104	0.734021	1.99047	0.0465395
ENSG00000250917.1	RP4-785G19.5	20.1787	1.45061	0.612998	2.36641	0.0179615
ENSG00000237523.1	LINC00857	554.52	1.44444	0.557313	2.59179	0.00954778
ENSG00000273691.1	RP11-617F23.2	65.8273	1.4437	0.446126	3.23609	0.00121179
ENSG00000260339.1	HEXA-AS1	20.8412	1.44281	0.618564	2.33251	0.0196736
ENSG00000277938.1	RP5-965G21.3	133.541	1.42088	0.494994	2.87049	0.00409836
ENSG00000268230.4	CTD-2619J13.8	68.9101	1.41369	0.549853	2.57103	0.0101396
ENSG00000273004.1	GS1-279B7.2	16.299	1.41347	0.536454	2.63483	0.00841792
ENSG00000236200.4	KDM4A-AS1	63.0741	1.41085	0.364378	3.87193	0.000107978
ENSG00000204261.7	PSMB8-AS1	628.461	1.40882	0.346019	4.07152	4.67e-05
ENSG00000237945.6	LINC00649	865.031	1.39397	0.485173	2.87315	0.00406403
ENSG00000251442.4	LINC01094	112.178	1.39257	0.568938	2.44766	0.0143789
ENSG00000219410.5	RP4-761J14.8	16.7883	1.38879	0.495657	2.80192	0.00507993
ENSG00000247011.2	RP11-700H6.1	29.8318	1.37489	0.626574	2.19429	0.0282145
ENSG00000229152.2	ANKRD10-IT1	458.823	1.37427	0.347766	3.95172	7.76e-05
ENSG00000256028.2	RP11-197N18.2	23.5118	1.37287	0.357318	3.84216	0.000121956
ENSG00000229587.2	RP11-197P3.5	44.7254	1.36317	0.503354	2.70818	0.0067653
ENSG00000214900.7	LINC01588	143.074	1.34794	0.450169	2.99429	0.00275084
ENSG00000257497.2	RP11-585P4.5	118.684	1.32472	0.555627	2.38419	0.0171167
ENSG00000274902.1	RP1-197B17.4	10.597	1.3237	0.558534	2.36995	0.0177903
ENSG00000269559.2	RP11-629B11.5	22.2579	1.32055	0.525623	2.51235	0.0119929
ENSG00000262580.4	RP11-334C17.5	289.98	1.31228	0.43023	3.05019	0.002287
ENSG00000277534.1	RP11-9E17.1	330.222	1.30944	0.556017	2.35503	0.0185213
ENSG00000272913.1	RP11-440D17.3	420.16	1.29577	0.610633	2.12201	0.0338366
ENSG00000237422.1	RP11-305L7.3	6.82145	1.29035	0.658033	1.96092	0.0498887
ENSG00000277595.1	RP11-946P6.6	11.772	1.28366	0.513479	2.49993	0.0124218
ENSG00000262001.1	DLGAP1-AS2	413.064	1.27964	0.516275	2.47861	0.0131896
ENSG00000261114.1	RP11-325K4.2	28.9751	1.26949	0.488104	2.60087	0.00929885
ENSG00000276744.1	CTD-2562G15.3	11.0472	1.26884	0.578083	2.19491	0.0281702
ENSG00000153363.11	LINC00467	635.605	1.26617	0.390369	3.24352	0.00118061
ENSG00000237200.1	ZBTB40-IT1	9.4888	1.26242	0.599844	2.10458	0.0353278
ENSG00000227230.1	RP11-261C10.5	11.5467	1.26111	0.623148	2.02377	0.0429941
ENSG00000274422.1	LL22NC03-2H8.5	575.957	1.25093	0.525137	2.38209	0.0172145
ENSG00000268403.2	CTD-2371O3.3	58.3877	1.25019	0.416891	2.99884	0.00271006
ENSG00000273139.1	XXbac-B444P24.14	5.54747	1.24572	0.625191	1.99255	0.0463107
ENSG00000268499.1	CTB-102L5.8	10.1231	1.24543	0.591627	2.1051	0.0352829
ENSG00000263235.1	RP11-461A8.4	81.8988	1.24355	0.467478	2.66012	0.0078113
ENSG00000273142.1	RP11-458F8.4	1021.05	1.23811	0.39486	3.13556	0.00171528
ENSG00000272540.1	XXbac-BPG252P9.9	23.1928	1.23323	0.398873	3.09179	0.00198953
ENSG00000265688.1	MAFG-AS1	320.637	1.22388	0.581856	2.10341	0.0354303
ENSG00000245614.3	DDX11-AS1	55.3128	1.21395	0.486978	2.49282	0.0126734
ENSG00000260806.1	RP11-872J21.3	60.2873	1.21282	0.430129	2.81966	0.00480742
ENSG00000272455.1	RP4-758J18.13	138.606	1.2095	0.421422	2.87004	0.00410423
ENSG00000228889.5	UBAC2-AS1	87.3985	1.18985	0.487877	2.43883	0.0147347
ENSG00000272529.1	RP11-415F23.4	28.2126	1.1835	0.446027	2.65342	0.00796807
ENSG00000215481.7	BCRP3	33.9663	1.18286	0.555233	2.13039	0.0331394
ENSG00000260942.1	CAPN10-AS1	131.289	1.18186	0.353078	3.3473	0.00081603
ENSG00000216895.7	AC009403.2	248.614	1.18006	0.362464	3.25565	0.00113132
ENSG00000116883.8	RP11-268J15.5	151.951	1.17859	0.597658	1.97201	0.0486079
ENSG00000276337.1	RP11-106D4.2	45.6337	1.17249	0.504037	2.32619	0.0200083
ENSG00000270072.1	RP11-750H9.7	23.9534	1.16976	0.51914	2.25326	0.0242425
ENSG00000260920.2	RP1-228H13.5	218.684	1.16743	0.401672	2.90643	0.0036558
ENSG00000259865.1	RP11-488L18.10	539.121	1.1631	0.35445	3.28142	0.00103287
ENSG00000236337.1	FMR1-IT1	12.7628	1.15937	0.499757	2.31986	0.0203482
ENSG00000261512.2	RP11-46D6.1	141.042	1.15769	0.42639	2.71509	0.00662583
ENSG00000281398.1	SNHG4	229.29	1.15755	0.424523	2.7267	0.00639712
ENSG00000223478.1	RP11-545E17.3	91.6611	1.15587	0.43987	2.62776	0.00859491
ENSG00000273759.1	RP4-563E14.1	39.3219	1.14815	0.436941	2.6277	0.00859638
ENSG00000177788.5	RP5-1061H20.4	54.6126	1.14647	0.447832	2.56005	0.0104658
ENSG00000267048.1	RP11-566K11.7	12.6824	1.14328	0.491852	2.32443	0.0201023
ENSG00000272945.1	CTD-3216D2.5	18.1119	1.14247	0.570539	2.00245	0.0452367
ENSG00000280169.1	RP11-151A6.6	9.49759	1.13874	0.570945	1.99448	0.0460992
ENSG00000273373.1	RP5-1074L1.4	305.487	1.12975	0.371032	3.04489	0.00232767
ENSG00000276809.1	RP11-10E18.7	17.2788	1.12922	0.433595	2.60431	0.00920595
ENSG00000273192.1	CITF22-1A6.3	50.4537	1.12362	0.352196	3.19032	0.00142117
ENSG00000239213.4	NCK1-AS1	179.659	1.11521	0.345569	3.22717	0.00125023
ENSG00000229531.4	RP1-102G20.5	24.3851	1.10968	0.522048	2.12563	0.0335337
ENSG00000269653.1	CTB-102L5.7	59.2466	1.10898	0.443697	2.4994	0.0124404
ENSG00000229512.1	AC068580.5	28.8704	1.10175	0.517244	2.13003	0.0331688
ENSG00000242349.4	NPPA-AS1	50.6861	1.10071	0.551978	1.99412	0.0461387
ENSG00000269609.4	RPARP-AS1	654.687	1.0878	0.368305	2.95352	0.00314169
ENSG00000237491.7	RP11-206L10.9	101.764	1.08429	0.371312	2.92017	0.00349838
ENSG00000257605.2	RP11-680A11.5	33.7994	1.08409	0.333594	3.24973	0.00115517
ENSG00000259398.1	RP11-430B1.1	24.4909	1.08008	0.534921	2.01914	0.0434728
ENSG00000273243.1	CTA-217C2.2	37.1671	1.05703	0.391881	2.69732	0.00698997
ENSG00000196696.11	PDXDC2P	744.258	1.05193	0.412928	2.54748	0.0108504
ENSG00000197989.12	SNHG12	806.505	1.04232	0.318923	3.26825	0.00108214
ENSG00000226179.4	LINC00685	28.8538	1.03627	0.480602	2.1562	0.0310683
ENSG00000223528.6	RP11-223P11.3	31.4221	1.03272	0.45592	2.26514	0.0235042
ENSG00000234072.1	AC074117.10	514.695	1.02757	0.341555	3.0085	0.00262543
ENSG00000261008.5	LINC01572	68.9133	1.01714	0.411626	2.47103	0.0134725
ENSG00000274292.1	RP11-347I19.7	45.2552	1.00675	0.461288	2.18248	0.0290743
ENSG00000260136.4	CTD-2270L9.4	84.1815	1.00666	0.374091	2.69095	0.00712484
ENSG00000259407.1	RP11-158M2.3	27.8954	1.005	0.471863	2.12985	0.0331839
ENSG00000272476.1	RP1-191J18.66	57.0649	1.0023	0.402352	2.49112	0.0127342
ENSG00000268001.1	CARD8-AS1	197.76	1.00006	0.387237	2.58256	0.00980703
ENSG00000260708.1	CTA-29F11.1	149.975	-1.00026	0.400447	-2.49786	0.0124946
ENSG00000224043.6	CCNT2-AS1	38.3701	-1.01554	0.349192	-2.90825	0.00363453
ENSG00000259877.2	RP11-46C24.7	137.054	-1.0181	0.355078	-2.86725	0.00414058
ENSG00000267106.4	ZNF561-AS1	189.772	-1.0206	0.318362	-3.2058	0.00134689
ENSG00000224152.1	AC009506.1	156.576	-1.02642	0.389431	-2.63568	0.00839692
ENSG00000268584.1	RP11-464F9.20	32.6161	-1.02842	0.384177	-2.67695	0.00742947
ENSG00000225975.5	LINC01534	59.203	-1.03236	0.451736	-2.28531	0.0222946
ENSG00000204758.6	CTC-308K20.1	39.2142	-1.04057	0.372834	-2.79097	0.00525511
ENSG00000271009.2	RP11-346C20.3	18.6668	-1.04984	0.522047	-2.01101	0.0443246
ENSG00000249786.6	EAF1-AS1	24.3856	-1.05095	0.472465	-2.2244	0.0261218
ENSG00000272589.1	ZSWIM8-AS1	5.55919	-1.05216	0.500383	-2.10272	0.0354903
ENSG00000274918.1	RP11-54G14.1	9.80972	-1.0524	0.446728	-2.3558	0.018483
ENSG00000245317.2	CTC-241N9.1	55.1623	-1.05586	0.358607	-2.94434	0.00323646
ENSG00000231711.2	LINC00899	103.636	-1.05612	0.437407	-2.41449	0.0157571
ENSG00000253982.1	CTD-2336O2.1	352.748	-1.06432	0.359215	-2.96291	0.00304748
ENSG00000272750.1	RP11-378J18.8	149.114	-1.06581	0.30262	-3.52193	0.000428413
ENSG00000235257.7	ITGA9-AS1	146.582	-1.06886	0.410697	-2.60255	0.00925346
ENSG00000274828.1	RP11-567M16.6	152.223	-1.07024	0.419489	-2.5513	0.0107321
ENSG00000093100.13	XXbac-B461K10.4	16.3716	-1.07313	0.504732	-2.12614	0.0334915
ENSG00000273015.2	RP11-352M15.2	810.916	-1.07351	0.228739	-4.69317	2.69e-06
ENSG00000235092.4	ID2-AS1	45.9664	-1.0768	0.510693	-2.10851	0.0349869
ENSG00000274403.1	CTD-2036P10.6	12.8633	-1.07778	0.458527	-2.35053	0.0187469
ENSG00000261098.1	RP11-819C21.1	243.409	-1.08249	0.276397	-3.91644	8.99e-05
ENSG00000236901.4	MIR600HG	325.818	-1.09054	0.469512	-2.32271	0.0201946
ENSG00000242282.5	AC108488.4	85.8396	-1.09964	0.344685	-3.19028	0.00142134
ENSG00000232284.6	GNG12-AS1	63.438	-1.09965	0.478811	-2.29663	0.0216399
ENSG00000272983.1	RP11-508N22.12	35.0738	-1.10042	0.492866	-2.23269	0.0255692
ENSG00000228661.1	AC090587.5	19.779	-1.10692	0.499875	-2.21439	0.026802
ENSG00000272686.1	RP11-390E23.6	333.697	-1.11572	0.327193	-3.40997	0.000649706
ENSG00000253582.1	RP11-649G15.2	17.9406	-1.12754	0.521128	-2.16365	0.0304911
ENSG00000271751.1	RP11-110I1.14	11.4047	-1.13011	0.401892	-2.81198	0.00492383
ENSG00000255145.2	STX17-AS1	37.5112	-1.13804	0.483083	-2.35579	0.0184832
ENSG00000229852.2	RP11-398K22.12	142.844	-1.14003	0.455643	-2.50203	0.0123482
ENSG00000278376.1	RP11-158I9.8	73.8569	-1.1519	0.358351	-3.21446	0.00130692
ENSG00000260077.1	RP11-254F7.2	192.479	-1.15517	0.467567	-2.47059	0.0134891
ENSG00000276855.1	CTD-3157E16.2	219.65	-1.15571	0.586059	-1.97201	0.048609
ENSG00000279762.2	RP11-227G15.12	25.2417	-1.15852	0.494881	-2.341	0.0192322
ENSG00000272195.1	RP11-156E8.1	34.1568	-1.17815	0.402482	-2.92721	0.00342018
ENSG00000245573.6	BDNF-AS	71.3785	-1.17845	0.443065	-2.65977	0.00781929
ENSG00000231312.5	AC007246.3	419.857	-1.17966	0.291576	-4.04581	5.21e-05
ENSG00000260917.1	RP11-57H14.4	342.149	-1.18251	0.364173	-3.24712	0.00116581
ENSG00000175611.10	LINC00476	240.771	-1.19003	0.298939	-3.98086	6.87e-05
ENSG00000269386.4	RAB11B-AS1	167.794	-1.19128	0.327051	-3.64248	0.000270021
ENSG00000206567.8	AC022007.5	101.038	-1.19696	0.311477	-3.84286	0.000121607
ENSG00000261087.1	KB-1460A1.5	177.905	-1.19826	0.444672	-2.69471	0.00704507
ENSG00000278921.2	EPB41L4A-AS2	56.8052	-1.20007	0.589786	-2.03475	0.0418764
ENSG00000255455.2	RP11-890B15.3	469.706	-1.20327	0.417227	-2.88396	0.00392707
ENSG00000247624.5	CPEB2-AS1	5.54482	-1.21395	0.618341	-1.96323	0.0496193
ENSG00000261534.1	RP11-244O19.1	287.353	-1.21654	0.577991	-2.10478	0.0353104
ENSG00000261668.1	RP11-50D9.3	17.782	-1.22268	0.540878	-2.26055	0.0237872
ENSG00000228878.6	SEPT7-AS1	69.4726	-1.23113	0.414859	-2.9676	0.00300139
ENSG00000270040.1	RP11-416A14.1	4.17666	-1.23431	0.61556	-2.00518	0.0449433
ENSG00000260563.3	RP13-516M14.1	132.058	-1.24065	0.385508	-3.21822	0.0012899
ENSG00000270681.1	RP11-372K14.2	33.91	-1.24232	0.373018	-3.33047	0.000867006
ENSG00000266368.1	RP11-1096G20.5	5.39088	-1.24595	0.551165	-2.26058	0.0237856
ENSG00000239445.4	ST3GAL6-AS1	12.956	-1.24659	0.555858	-2.24263	0.0249204
ENSG00000276248.1	RP11-230F18.5	84.6238	-1.24715	0.354992	-3.51319	0.000442758
ENSG00000260257.2	RP5-1085F17.3	392.476	-1.24857	0.373309	-3.34459	0.000824034
ENSG00000248275.1	TRIM52-AS1	350.63	-1.24884	0.329666	-3.78821	0.000151737
ENSG00000234913.1	XXbac-B476C20.13	24.3567	-1.24924	0.551322	-2.2659	0.0234577
ENSG00000275765.3	RP11-54C4.3	105.669	-1.24925	0.434807	-2.87312	0.00406437
ENSG00000241860.5	RP11-34P13.13	14.7795	-1.26399	0.531362	-2.37877	0.0173704
ENSG00000260193.1	RP11-83N9.5	23.786	-1.26523	0.534837	-2.36563	0.0179995
ENSG00000273729.1	RP11-7F17.8	105.252	-1.26908	0.232317	-5.46272	4.69e-08
ENSG00000273338.1	RP11-386I14.4	29.8813	-1.26998	0.590434	-2.15093	0.0314819
ENSG00000258824.2	CTD-2555O16.2	62.3012	-1.27001	0.462206	-2.74771	0.00600134
ENSG00000247572.6	CKMT2-AS1	202.733	-1.27358	0.27495	-4.63202	3.62e-06
ENSG00000179818.12	PCBP1-AS1	1079.61	-1.2753	0.284273	-4.48617	7.25e-06
ENSG00000275963.1	RP11-180M15.6	9.55052	-1.27806	0.533733	-2.39457	0.0166397
ENSG00000235437.6	LINC01278	2403.35	-1.27981	0.4519	-2.83206	0.00462488
ENSG00000231871.4	IPO9-AS1	16.7644	-1.28288	0.393972	-3.25627	0.00112886
ENSG00000255471.1	RP11-736K20.5	36.6043	-1.28628	0.529684	-2.42838	0.0151662
ENSG00000276846.1	CTD-3220F14.3	21.5635	-1.28713	0.615942	-2.0897	0.0366449
ENSG00000226891.5	LINC01359	40.9147	-1.29563	0.585056	-2.21453	0.0267921
ENSG00000227028.5	SLC8A1-AS1	49.0469	-1.29814	0.548088	-2.3685	0.0178606
ENSG00000230630.2	DNM3OS	193.676	-1.30361	0.520147	-2.50623	0.0122026
ENSG00000228794.7	LINC01128	705.426	-1.31055	0.282986	-4.63113	3.64e-06
ENSG00000245281.5	CTD-2547L16.1	22.4665	-1.31447	0.486359	-2.70267	0.00687842
ENSG00000272909.1	CTD-2555O16.4	89.6056	-1.31786	0.33553	-3.9277	8.58e-05
ENSG00000266677.1	RP11-258F1.1	8.41673	-1.33592	0.500692	-2.66814	0.00762715
ENSG00000261544.1	RP11-16E23.3	7.45781	-1.33947	0.638132	-2.09904	0.0358131
ENSG00000238287.1	RP11-656D10.3	30.048	-1.342	0.50777	-2.64294	0.00821898
ENSG00000272734.1	ADIRF-AS1	212.564	-1.34258	0.529239	-2.53681	0.0111869
ENSG00000235641.4	LINC00484	10.4289	-1.34932	0.547074	-2.46644	0.0136465
ENSG00000272316.1	XXbac-BPGBPG55C20.2	83.7682	-1.3526	0.39982	-3.38303	0.0007169
ENSG00000269044.2	CTC-429P9.3	206.931	-1.36627	0.283054	-4.82689	1.39e-06
ENSG00000267272.4	LINC01140	44.1968	-1.37255	0.620357	-2.21252	0.026931
ENSG00000261215.1	RP11-195F19.30	6.14168	-1.38181	0.569058	-2.42824	0.0151725
ENSG00000274220.1	RP11-77K12.9	32.0067	-1.38415	0.481428	-2.8751	0.004039
ENSG00000197813.5	CTC-301O7.4	24.0913	-1.38502	0.531476	-2.60599	0.00916085
ENSG00000273419.1	RP4-751H13.7	10.2788	-1.38583	0.556775	-2.48902	0.0128094
ENSG00000253552.6	HOXA-AS2	349.491	-1.38839	0.521881	-2.66036	0.00780581
ENSG00000260244.1	RP11-588K22.2	1146.68	-1.3884	0.651071	-2.13249	0.0329667
ENSG00000261396.1	CTD-2012K14.2	5.78097	-1.39354	0.605767	-2.30046	0.0214221
ENSG00000275383.1	RP11-615I2.6	14.463	-1.39499	0.552357	-2.52551	0.0115529
ENSG00000244945.1	RP11-1379J22.2	49.5303	-1.39742	0.358445	-3.89858	9.68e-05
ENSG00000235865.2	GSN-AS1	113.381	-1.40587	0.478183	-2.94003	0.00328184
ENSG00000238290.1	RP11-431K24.1	19.7861	-1.40731	0.530152	-2.65454	0.00794174
ENSG00000277130.1	RP11-530C5.4	8.51135	-1.41218	0.448355	-3.14969	0.00163446
ENSG00000272370.1	RP11-307L14.1	17.4322	-1.41546	0.424732	-3.33261	0.000860366
ENSG00000260855.1	RP11-439E19.10	46.0123	-1.41927	0.475563	-2.9844	0.00284137
ENSG00000196951.9	SCOC-AS1	24.7534	-1.42011	0.467785	-3.03581	0.00239888
ENSG00000260966.1	RP11-690D19.3	197.817	-1.42455	0.428023	-3.32821	0.000874071
ENSG00000229980.4	TOB1-AS1	80.8529	-1.42519	0.355682	-4.00692	6.15e-05
ENSG00000245248.6	USP2-AS1	85.5369	-1.42782	0.655217	-2.17916	0.02932
ENSG00000205930.7	C21orf62-AS1	36.117	-1.42904	0.519799	-2.74922	0.0059738
ENSG00000232611.1	RP11-1114A5.4	94.995	-1.4301	0.379635	-3.76703	0.0001652
ENSG00000254473.1	RP11-522I20.3	72.3557	-1.43275	0.380755	-3.7629	0.000167952
ENSG00000260583.1	AP000223.42	8.01856	-1.43398	0.543122	-2.64026	0.00828421
ENSG00000263335.1	AF001548.5	204.122	-1.43948	0.526215	-2.73553	0.00622792
ENSG00000228649.7	AC005682.5	84.8872	-1.44098	0.547329	-2.63275	0.00846971
ENSG00000258057.4	BCDIN3D-AS1	40.6958	-1.44227	0.338224	-4.26424	2.01e-05
ENSG00000232081.1	LARGE-IT1	3.75672	-1.44661	0.650652	-2.22333	0.0261938
ENSG00000272106.1	RP11-345P4.9	246.43	-1.46298	0.299211	-4.88945	1.01e-06
ENSG00000247121.5	CTD-2260A17.2	84.3729	-1.46461	0.303442	-4.82667	1.39e-06
ENSG00000262879.4	RP11-156P1.3	390.155	-1.47497	0.364119	-4.05078	5.1e-05
ENSG00000259976.1	RP11-553L6.5	986.161	-1.47763	0.415193	-3.55889	0.00037242
ENSG00000254343.2	RP11-760H22.2	256.449	-1.47858	0.487996	-3.0299	0.00244637
ENSG00000177112.6	MRVI1-AS1	12.3232	-1.47968	0.657974	-2.24884	0.0245228
ENSG00000273432.1	RP5-1165K10.2	14.9655	-1.48104	0.4382	-3.37984	0.000725287
ENSG00000260464.1	RP4-561L24.3	22.9479	-1.48711	0.445728	-3.33637	0.000848809
ENSG00000203709.8	C1orf132	378.937	-1.48931	0.589217	-2.52761	0.0114843
ENSG00000272384.1	RP11-44N11.2	10.0521	-1.48975	0.545828	-2.72934	0.00634612
ENSG00000237596.5	RP13-143G15.4	22.6139	-1.48996	0.689933	-2.15957	0.0308058
ENSG00000277449.1	CEBPB-AS1	52.9567	-1.4936	0.378266	-3.94854	7.86e-05
ENSG00000258957.1	RP11-363J20.1	10.8174	-1.49442	0.53432	-2.79686	0.0051602
ENSG00000271452.1	RP11-342K6.2	83.4336	-1.50227	0.308276	-4.87312	1.1e-06
ENSG00000272181.1	RP11-245J9.6	8.19245	-1.50542	0.47641	-3.15993	0.00157809
ENSG00000258334.1	RP11-161H23.9	12.0362	-1.50993	0.577869	-2.61292	0.0089772
ENSG00000244968.5	LIFR-AS1	67.0947	-1.51173	0.646083	-2.33984	0.0192918
ENSG00000278611.1	CTC-543D15.8	41.4934	-1.5201	0.581479	-2.6142	0.00894358
ENSG00000272973.1	KB-1125A3.11	4.50591	-1.52016	0.678514	-2.24042	0.0250636
ENSG00000230212.5	AP000688.14	13.1158	-1.52057	0.605391	-2.51172	0.0120145
ENSG00000272831.1	RP11-792A8.4	42.9915	-1.52098	0.451511	-3.36864	0.000755388
ENSG00000231160.8	KLF3-AS1	158.913	-1.52353	0.348238	-4.37498	1.21e-05
ENSG00000225465.8	RFPL1S	20.1591	-1.52772	0.653442	-2.33795	0.0193898
ENSG00000238184.1	CD81-AS1	10.0106	-1.52795	0.520883	-2.93338	0.00335295
ENSG00000186594.11	MIR22HG	1048.94	-1.52943	0.433088	-3.53146	0.000413274
ENSG00000247934.4	RP11-967K21.1	140.846	-1.53127	0.469848	-3.25907	0.00111779
ENSG00000223764.2	RP11-54O7.3	92.0696	-1.53162	0.65929	-2.32314	0.0201715
ENSG00000203392.3	CTD-2026K11.6	60.5714	-1.53854	0.469227	-3.27889	0.00104218
ENSG00000270742.1	RP4-802A10.1	6.91117	-1.54129	0.514636	-2.99492	0.0027452
ENSG00000270659.1	RP11-105N14.1	17.0017	-1.55505	0.661221	-2.35178	0.0186839
ENSG00000268568.1	AC007228.9	65.6027	-1.56201	0.425114	-3.67434	0.000238465
ENSG00000214783.8	POLR2J4	169.104	-1.56267	0.364857	-4.28296	1.84e-05
ENSG00000254615.2	RP11-395G23.3	39.9576	-1.56494	0.619188	-2.52741	0.0114907
ENSG00000230091.5	TMEM254-AS1	79.0006	-1.56816	0.562558	-2.78755	0.00531088
ENSG00000222043.2	AC079305.10	15.9271	-1.57599	0.48956	-3.21919	0.00128551
ENSG00000275494.1	RP11-266L9.8	55.702	-1.57835	0.472399	-3.34114	0.000834339
ENSG00000272482.1	RP11-474O21.5	24.4155	-1.58067	0.612202	-2.58193	0.00982481
ENSG00000258813.2	RP11-109N23.4	9.6774	-1.5821	0.494775	-3.19762	0.00138568
ENSG00000273156.1	RP11-127B20.2	50.086	-1.58363	0.528467	-2.99665	0.0027296
ENSG00000281852.1	LINC00891	10.7721	-1.58768	0.794248	-1.99897	0.0456116
ENSG00000266983.1	CTC-232P5.1	21.1883	-1.59474	0.456034	-3.49697	0.000470574
ENSG00000280798.1	LINC00294	771.519	-1.59509	0.335415	-4.75557	1.98e-06
ENSG00000180422.3	LINC00304	9.57763	-1.60233	0.793439	-2.01947	0.0434385
ENSG00000224165.4	DNAJC27-AS1	46.0395	-1.60758	0.440388	-3.65037	0.000261865
ENSG00000233429.8	HOTAIRM1	438.74	-1.61352	0.489357	-3.29722	0.000976478
ENSG00000245468.3	RP11-367J11.3	18.8291	-1.61606	0.511646	-3.15856	0.00158551
ENSG00000265142.5	MIR133A1HG	36.5321	-1.61762	0.584703	-2.76657	0.00566492
ENSG00000228065.9	LINC01515	132.167	-1.62187	0.704321	-2.30274	0.0212933
ENSG00000215386.9	MIR99AHG	126.408	-1.62598	0.827993	-1.96375	0.0495586
ENSG00000226711.5	FAM66C	53.7244	-1.63451	0.539807	-3.02796	0.00246212
ENSG00000250790.4	RP11-46H11.3	35.9128	-1.63636	0.620234	-2.6383	0.00833229
ENSG00000259523.1	RP11-680F8.3	38.1272	-1.63674	0.485905	-3.36844	0.000755937
ENSG00000271926.1	CTD-2376I4.1	7.8068	-1.64014	0.564338	-2.90631	0.00365718
ENSG00000258655.2	ARHGAP5-AS1	197.003	-1.64036	0.444978	-3.68638	0.000227469
ENSG00000259065.1	RP5-1021I20.1	48.5488	-1.6405	0.500578	-3.27721	0.00104838
ENSG00000180139.11	ACTA2-AS1	286.853	-1.65163	0.776058	-2.12823	0.0333181
ENSG00000259319.1	RP11-293M10.6	87.1697	-1.65244	0.467631	-3.53363	0.000409893
ENSG00000224063.4	AC007319.1	25.1979	-1.65468	0.693779	-2.38502	0.0170781
ENSG00000234456.6	MAGI2-AS3	668.972	-1.65542	0.554645	-2.98464	0.00283914
ENSG00000225342.2	AC079630.4	18.7079	-1.66373	0.657896	-2.52886	0.0114434
ENSG00000260329.1	RP11-412D9.4	24.8035	-1.67204	0.52675	-3.17425	0.00150226
ENSG00000251615.3	RP11-774O3.3	231.513	-1.68289	0.527241	-3.19189	0.00141347
ENSG00000250132.5	RP11-359B12.2	153.889	-1.69262	0.384706	-4.39977	1.08e-05
ENSG00000234396.3	RP11-181G12.4	2.82561	-1.6927	0.7868	-2.15137	0.0314469
ENSG00000249679.1	RP11-279O9.4	11.2608	-1.6934	0.642226	-2.63677	0.00836993
ENSG00000214145.5	LINC00887	47.8965	-1.69436	0.743305	-2.2795	0.0226376
ENSG00000250320.4	CTD-2269F5.1	19.0188	-1.70116	0.583141	-2.91723	0.00353157
ENSG00000272108.1	AC005754.8	22.2723	-1.70378	0.830931	-2.05045	0.0403207
ENSG00000241985.1	WWTR1-IT1	9.58647	-1.7193	0.695095	-2.47348	0.0133806
ENSG00000267414.1	RP11-456K23.1	47.4223	-1.7201	0.637192	-2.6995	0.0069443
ENSG00000267058.1	RP11-15A1.3	23.8686	-1.72224	0.659512	-2.61139	0.00901751
ENSG00000268536.1	AC005523.3	3.05224	-1.72897	0.740673	-2.33433	0.0195786
ENSG00000240498.5	CDKN2B-AS1	72.6744	-1.73114	0.818558	-2.11486	0.0344417
ENSG00000232229.4	LINC00865	156.909	-1.73296	0.765371	-2.2642	0.0235616
ENSG00000259275.2	RP11-522B15.3	93.4878	-1.73406	0.598173	-2.89893	0.00374435
ENSG00000249684.4	RP11-423H2.3	24.022	-1.73465	0.656391	-2.6427	0.00822471
ENSG00000260278.1	RP11-109G23.3	6.92135	-1.73687	0.847934	-2.04835	0.0405255
ENSG00000227811.2	FAM212B-AS1	3.60982	-1.7505	0.752784	-2.32537	0.020052
ENSG00000246695.6	RASSF8-AS1	167.567	-1.75685	0.670706	-2.6194	0.00880843
ENSG00000229956.8	ZRANB2-AS2	20.8604	-1.76467	0.491968	-3.58697	0.000334544
ENSG00000260822.1	GS1-358P8.4	1712.26	-1.77345	0.438051	-4.04851	5.15e-05
ENSG00000275409.1	RP11-131L12.4	17.6209	-1.78983	0.545312	-3.28221	0.00102997
ENSG00000223891.4	OSER1-AS1	260.069	-1.79484	0.442373	-4.05729	4.96e-05
ENSG00000270028.1	RP11-380L11.4	15.3202	-1.79716	0.548481	-3.27662	0.00105057
ENSG00000254911.3	SCARNA9	76.5999	-1.80233	0.482679	-3.73402	0.000188449
ENSG00000266916.4	ZNF793-AS1	35.1884	-1.80438	0.821261	-2.19708	0.0280144
ENSG00000273184.1	RP11-212P7.3	2.30721	-1.80872	0.803363	-2.25144	0.0243578
ENSG00000230696.1	AC011753.5	5.96767	-1.81635	0.626839	-2.89763	0.00375993
ENSG00000260400.1	RP11-119F7.5	70.6587	-1.81768	0.482876	-3.76428	0.000167029
ENSG00000233862.4	AC016907.3	6.73879	-1.81956	0.881292	-2.06465	0.0389564
ENSG00000231249.1	ITPR1-AS1	10.6602	-1.81965	0.571762	-3.18253	0.00145996
ENSG00000180769.7	WDFY3-AS2	91.3697	-1.8243	0.434484	-4.19877	2.68e-05
ENSG00000231652.2	RP11-553A21.3	9.10257	-1.82445	0.705969	-2.58433	0.00975696
ENSG00000226403.1	RP11-31F19.1	1.93654	-1.84553	0.925753	-1.99354	0.046202
ENSG00000227237.1	AL672294.1	3.1602	-1.84594	0.775218	-2.38119	0.0172569
ENSG00000249249.1	AC010226.4	46.4632	-1.85077	0.33414	-5.53891	3.04e-08
ENSG00000261064.1	RP11-1000B6.3	25.3673	-1.85148	0.548176	-3.37753	0.000731389
ENSG00000251867.3	RP11-48B3.5	40.34	-1.86966	0.609299	-3.06854	0.00215108
ENSG00000272130.1	RP11-360I2.1	2.30352	-1.87209	0.76937	-2.43328	0.0149628
ENSG00000260625.2	RP11-452L6.7	10.0598	-1.87406	0.512929	-3.65364	0.00025855
ENSG00000265778.2	RP11-17M16.2	49.2945	-1.87642	0.448892	-4.18012	2.91e-05
ENSG00000229589.1	ACVR2B-AS1	78.078	-1.88516	0.406206	-4.64089	3.47e-06
ENSG00000229619.3	MBNL1-AS1	644.211	-1.88577	0.823651	-2.28952	0.0220491
ENSG00000235501.4	RP4-639F20.1	169.448	-1.88845	0.548024	-3.44592	0.000569117
ENSG00000247809.6	NR2F2-AS1	85.2959	-1.89429	0.622693	-3.04209	0.00234943
ENSG00000225439.2	BOLA3-AS1	102.334	-1.89574	0.667679	-2.8393	0.00452126
ENSG00000235652.6	RP11-545I5.3	97.5911	-1.90031	0.426933	-4.45109	8.54e-06
ENSG00000271367.1	RP3-483K16.4	2.27039	-1.90341	0.928867	-2.04917	0.0404452
ENSG00000233693.1	RP11-506O24.1	5.41141	-1.90756	0.741319	-2.5732	0.0100764
ENSG00000269293.2	ZSCAN16-AS1	278.284	-1.91145	0.409134	-4.67194	2.98e-06
ENSG00000258711.2	RP11-218E20.3	11.0024	-1.91264	0.74653	-2.56204	0.0104059
ENSG00000176984.5	AP000679.2	5.15489	-1.92517	0.977411	-1.96966	0.0488773
ENSG00000228293.1	RP4-686C3.7	4.08961	-1.92617	0.8474	-2.27304	0.0230239
ENSG00000224743.5	TEX26-AS1	19.274	-1.92965	0.895093	-2.15581	0.0310987
ENSG00000254141.1	RP11-642D21.1	4.65719	-1.93052	0.913151	-2.11413	0.0345044
ENSG00000226089.2	RP1-300G12.2	1.91857	-1.93209	0.922206	-2.09507	0.0361649
ENSG00000236467.6	KCNMA1-AS1	11.0993	-1.94737	0.851126	-2.28799	0.022138
ENSG00000226686.6	LINC01535	35.5435	-1.95818	0.875832	-2.2358	0.0253652
ENSG00000270607.1	RP11-359E10.1	29.4244	-1.96621	0.802094	-2.45135	0.0142322
ENSG00000268388.4	FENDRR	1359.19	-1.97202	0.724524	-2.72182	0.00649233
ENSG00000267581.1	CTC-559E9.4	3.62309	-1.97624	0.595398	-3.31919	0.000902804
ENSG00000270332.1	SMC2-AS1	18.9333	-1.99128	0.727101	-2.73865	0.00616919
ENSG00000255384.1	RP11-770J1.4	6.64784	-2.0076	0.787908	-2.54801	0.0108339
ENSG00000230387.2	RP4-737E23.2	9.27445	-2.0161	0.900074	-2.23993	0.0250954
ENSG00000197291.7	RAMP2-AS1	85.9952	-2.01881	0.728088	-2.77276	0.00555835
ENSG00000228013.1	RP11-350G8.5	15.5619	-2.0433	0.52788	-3.87077	0.000108492
ENSG00000281809.1	LINC01394	4.17368	-2.04623	0.780469	-2.6218	0.00874677
ENSG00000248668.2	OXCT1-AS1	17.0897	-2.04923	0.683443	-2.99839	0.00271409
ENSG00000265702.1	RP11-156L14.1	5.50122	-2.05688	1.032	-1.99311	0.0462498
ENSG00000245598.5	DACT3-AS1	14.103	-2.06421	0.471787	-4.37529	1.21e-05
ENSG00000274492.1	RP11-976B16.1	5.25271	-2.07601	0.840873	-2.46888	0.0135537
ENSG00000259462.2	CPEB1-AS1	7.21426	-2.10573	0.830889	-2.53431	0.0112668
ENSG00000258441.1	LINC00641	707.6	-2.10719	0.403586	-5.22117	1.78e-07
ENSG00000267254.4	ZNF790-AS1	37.8182	-2.10994	0.631752	-3.33983	0.000838299
ENSG00000232063.1	RP11-307E17.8	27.8818	-2.11381	0.582816	-3.62689	0.000286853
ENSG00000258708.1	SLC25A21-AS1	53.88	-2.13352	0.691092	-3.08718	0.00202068
ENSG00000248079.2	DPH6-AS1	7.91594	-2.14069	0.775764	-2.75946	0.00578972
ENSG00000253948.1	RP11-410L14.2	61.2638	-2.14857	0.428925	-5.0092	5.47e-07
ENSG00000278351.1	RP11-139E19.3	1.88468	-2.16894	0.935142	-2.31937	0.0203752
ENSG00000228010.4	AC073343.13	15.1887	-2.17217	0.574888	-3.77842	0.000157824
ENSG00000272549.1	RP11-351J23.2	35.3722	-2.19277	1.05402	-2.08038	0.0374909
ENSG00000261616.1	RP11-6O2.3	162.506	-2.20661	0.923551	-2.38926	0.0168822
ENSG00000257698.1	RP11-620J15.3	87.4574	-2.20663	0.551884	-3.99835	6.38e-05
ENSG00000269959.1	SPACA6P-AS	10.6637	-2.2134	0.921816	-2.40114	0.0163443
ENSG00000254027.1	RP11-363E6.3	23.6668	-2.22485	0.680747	-3.26825	0.00108213
ENSG00000272463.1	RP11-532F6.3	88.1882	-2.22772	0.64555	-3.45088	0.000558759
ENSG00000263590.2	RP11-403I13.7	2.52202	-2.22956	0.984599	-2.26443	0.0235476
ENSG00000237187.7	NR2F1-AS1	236.709	-2.22965	0.595596	-3.74357	0.000181425
ENSG00000240758.2	RP11-155G14.6	11.6998	-2.25637	0.780184	-2.8921	0.00382679
ENSG00000253586.1	RP11-723D22.2	3.36066	-2.2571	0.863821	-2.61293	0.00897702
ENSG00000253190.3	AC084082.3	2.61128	-2.26522	1.08989	-2.07839	0.0376739
ENSG00000230300.1	STARD13-IT1	2.67836	-2.27371	0.758389	-2.99809	0.00271681
ENSG00000232160.5	RAP2C-AS1	138.292	-2.27386	0.414746	-5.48254	4.19e-08
ENSG00000248469.1	RP11-826N14.2	1.57513	-2.28619	1.12831	-2.02621	0.0427431
ENSG00000166770.9	ZNF667-AS1	281.456	-2.28777	0.658056	-3.47656	0.000507886
ENSG00000259291.2	RP11-617F23.1	660.57	-2.28989	0.594367	-3.85265	0.000116846
ENSG00000271347.1	RP11-701H24.7	8.55035	-2.31954	0.820504	-2.82697	0.00469901
ENSG00000270021.1	CTC-203F4.2	29.4612	-2.32313	0.482646	-4.81332	1.48e-06
ENSG00000183242.10	WT1-AS	12.7562	-2.32707	0.956289	-2.43344	0.0149561
ENSG00000272159.1	RP11-350N15.6	3.80999	-2.32755	0.825955	-2.81801	0.00483221
ENSG00000254561.3	RP11-196E1.3	6.54349	-2.33083	0.889248	-2.62113	0.00876388
ENSG00000236404.7	VLDLR-AS1	21.7234	-2.34824	0.813026	-2.88828	0.00387359
ENSG00000259663.2	CTD-2314G24.2	183.496	-2.35005	0.853244	-2.75425	0.00588269
ENSG00000261069.3	RP11-701H24.4	14.0801	-2.35583	0.865309	-2.72253	0.00647835
ENSG00000225746.7	SNHG23	12.4089	-2.37355	0.724882	-3.2744	0.00105885
ENSG00000272631.1	RP11-359E3.4	131.752	-2.38457	0.472329	-5.04855	4.45e-07
ENSG00000232973.10	CYP1B1-AS1	48.324	-2.41851	0.608719	-3.97312	7.09e-05
ENSG00000265489.1	RP11-1090M7.1	9.46474	-2.42043	0.854157	-2.8337	0.0046012
ENSG00000250241.4	RP11-9G1.3	4.30191	-2.43307	1.13983	-2.13459	0.0327942
ENSG00000255366.1	RP11-1134I14.8	29.5298	-2.44842	0.834367	-2.93446	0.00334128
ENSG00000203930.9	LINC00632	13.8392	-2.45993	0.841518	-2.9232	0.00346456
ENSG00000185186.7	LINC00313	2.27439	-2.46861	0.900127	-2.74252	0.00609705
ENSG00000275345.1	RP11-697E2.11	3.80293	-2.47393	0.604926	-4.08964	4.32e-05
ENSG00000273175.1	RP11-11N7.4	4.01804	-2.52897	0.786109	-3.21708	0.00129504
ENSG00000260466.1	RP4-536B24.2	3.8279	-2.55928	0.934406	-2.73894	0.00616381
ENSG00000250303.3	RP11-356J5.12	153.27	-2.56027	0.472231	-5.42165	5.91e-08
ENSG00000224078.11	SNHG14	1058.74	-2.60112	0.707936	-3.67423	0.000238572
ENSG00000230074.1	RP11-195F19.9	41.5188	-2.6105	0.594562	-4.39063	1.13e-05
ENSG00000265962.1	GACAT2	10.8266	-2.64551	0.942419	-2.80715	0.00499824
ENSG00000233705.5	SLC26A4-AS1	22.984	-2.67172	0.96191	-2.77752	0.00547759
ENSG00000261026.1	CTD-3247F14.2	28.7281	-2.70171	0.928392	-2.91009	0.00361321
ENSG00000229847.7	EMX2OS	22.5094	-2.71288	0.953541	-2.84506	0.00444032
ENSG00000272870.1	RP11-798M19.6	95.2608	-2.71554	0.462195	-5.87531	4.22e-09
ENSG00000254539.1	RP4-791M13.3	0.917356	-2.72646	1.07714	-2.5312	0.0113673
ENSG00000173811.9	CCDC13-AS1	11.3155	-2.73061	0.537448	-5.08068	3.76e-07
ENSG00000267532.3	MIR497HG	37.7987	-2.73603	0.539301	-5.07328	3.91e-07
ENSG00000227467.3	LINC01537	18.0914	-2.7548	0.644654	-4.2733	1.93e-05
ENSG00000271880.1	AGAP11	8.09667	-2.80054	0.785575	-3.56496	0.000363917
ENSG00000166917.8	MIR202HG	1.94781	-2.87782	1.18763	-2.42315	0.0153865
ENSG00000226530.1	RP11-348F1.2	4.46907	-2.89325	1.35264	-2.13896	0.0324386
ENSG00000272657.1	AP000320.7	2.76929	-2.8949	0.758949	-3.81435	0.000136542
ENSG00000151303.11	RP11-96C23.13	9.41472	-2.90182	0.694489	-4.17835	2.94e-05
ENSG00000242759.5	LINC00882	21.0179	-2.91744	0.658336	-4.43153	9.36e-06
ENSG00000259744.1	RP11-138H8.6	4.05408	-2.95065	0.886108	-3.3299	0.000868787
ENSG00000267034.1	RP11-384O8.1	26.949	-2.95232	0.991362	-2.97805	0.00290092
ENSG00000257151.1	PWAR6	132.761	-2.96367	0.788465	-3.75879	0.00017074
ENSG00000259708.1	RP11-762H8.3	1.17915	-2.98668	1.49384	-1.99933	0.0455728
ENSG00000267327.1	CTD-2008L17.1	8.92897	-2.98945	1.39456	-2.14365	0.0320613
ENSG00000268555.1	RP11-678G14.3	19.5907	-3.00886	1.26242	-2.38341	0.017153
ENSG00000261600.1	RP11-575H3.1	10.1612	-3.01344	1.05061	-2.86827	0.00412724
ENSG00000272780.4	RP11-822E23.8	1.62664	-3.03367	1.03162	-2.9407	0.0032747
ENSG00000270071.1	AP001172.2	1.3003	-3.04641	1.16184	-2.62206	0.00873994
ENSG00000223523.1	AC079613.1	4.99787	-3.05459	1.30162	-2.34677	0.018937
ENSG00000243319.6	FGF14-IT1	3.81907	-3.05583	1.37734	-2.21865	0.0265107
ENSG00000228222.1	AC074363.1	1.47755	-3.10064	1.51133	-2.05161	0.040208
ENSG00000224592.4	RP5-884C9.2	5.73045	-3.16698	1.1665	-2.71495	0.00662854
ENSG00000281692.1	PACRG-AS1	2.60154	-3.16701	1.46764	-2.15789	0.0309368
ENSG00000230699.2	RP11-54O7.1	28.1055	-3.16745	0.987868	-3.20635	0.00134431
ENSG00000224905.5	AP001347.6	40.0295	-3.17834	0.839932	-3.78404	0.000154303
ENSG00000258754.6	LINC01579	124.776	-3.21024	1.15877	-2.77038	0.00559902
ENSG00000272163.1	GS1-72M22.1	2.95005	-3.21124	1.55593	-2.06387	0.0390296
ENSG00000241684.4	ADAMTS9-AS2	93.3126	-3.24528	0.77764	-4.17324	3e-05
ENSG00000225792.1	AC004540.4	23.4961	-3.26309	0.709595	-4.59852	4.26e-06
ENSG00000265043.1	RP11-728E14.3	1.52302	-3.27066	1.35446	-2.41473	0.015747
ENSG00000236740.5	RP11-411K7.1	38.0446	-3.27746	1.04294	-3.14251	0.00167507
ENSG00000245526.7	LINC00461	10.679	-3.28078	1.05702	-3.10379	0.00191058
ENSG00000226622.4	AC092155.4	2.47018	-3.28086	1.27833	-2.56652	0.0102726
ENSG00000223502.1	RP11-96B5.3	1.49846	-3.36698	0.892948	-3.77063	0.000162836
ENSG00000237125.7	HAND2-AS1	824.641	-3.38617	1.33226	-2.54168	0.0110321
ENSG00000230393.1	AC092667.2	5.98709	-3.40665	1.36312	-2.49915	0.012449
ENSG00000279685.2	MAPT-IT1	2.2506	-3.43417	1.19549	-2.8726	0.00407109
ENSG00000270704.3	RP11-701H24.5	4.44253	-3.47456	0.95171	-3.65086	0.000261359
ENSG00000253973.2	RP11-467K18.2	5.77903	-3.47989	1.27733	-2.72434	0.00644297
ENSG00000237975.5	FLG-AS1	43.5404	-3.50002	0.897405	-3.90016	9.61e-05
ENSG00000152931.7	PART1	313.404	-3.5062	1.0458	-3.35267	0.000800373
ENSG00000234880.1	LINC00163	4.97386	-3.56385	1.15497	-3.08566	0.00203098
ENSG00000259910.1	RP11-616M22.2	1.07205	-3.61271	1.48617	-2.43088	0.0150621
ENSG00000235426.2	RP11-342M3.5	1.2547	-3.61484	1.007	-3.58972	0.000331028
ENSG00000223561.5	AC003090.1	53.5668	-3.6635	1.01637	-3.6045	0.000312759
ENSG00000226872.1	AC002472.11	0.975837	-3.68238	1.51946	-2.42348	0.0153727
ENSG00000265542.4	RP11-60A24.3	3.88383	-3.68811	0.941579	-3.91695	8.97e-05
ENSG00000244953.1	RP11-613D13.8	19.6968	-3.71406	0.688214	-5.39666	6.79e-08
ENSG00000243069.6	ARHGEF26-AS1	35.4282	-3.82669	1.01656	-3.76437	0.000166968
ENSG00000260035.1	CTD-2651B20.6	4.01046	-3.88602	1.48134	-2.62332	0.00870787
ENSG00000254510.1	RP11-867G23.10	44.6069	-3.93838	0.888551	-4.43236	9.32e-06
ENSG00000255727.1	LINC01489	1.83007	-3.99132	1.33287	-2.99453	0.00274872
ENSG00000259370.2	RP11-1069G10.1	110.686	-3.99186	0.665095	-6.00194	1.95e-09
ENSG00000241158.4	ADAMTS9-AS1	54.6223	-4.08685	0.653741	-6.25149	4.07e-10
ENSG00000250056.4	LINC01018	38.0536	-4.1555	1.27049	-3.27078	0.00107252
ENSG00000256341.1	RP11-21A7A.3	0.630415	-4.31215	1.36612	-3.1565	0.00159673
ENSG00000248994.1	RP11-259O2.1	6.47348	-4.76458	1.13723	-4.18963	2.79e-05
ENSG00000223414.2	LINC00473	116.984	-5.16257	1.28574	-4.01525	5.94e-05
ENSG00000249082.2	C5orf66-AS1	139.417	-6.02263	1.14284	-5.26987	1.37e-07
ENSG00000261606.4	RP11-414J4.2	4.94602	-6.29313	1.01842	-6.17928	6.44e-10

## Sheet: Table S6
Table S6. Details for H.pylori infection related lncRNAs regulatory network
lncRNAid	lncRNAgene	miRNAid	miRNAname	geneid	genename
ENSG00000204860.4	FAM201A	MIMAT0000099	hsa-miR-101-3p	ENSG00000166086	JAM3
ENSG00000204860.4	FAM201A	MIMAT0000099	hsa-miR-101-3p	ENSG00000024526	DEPDC1
ENSG00000237978.4	KCNMB2-AS1	MIMAT0000099	hsa-miR-101-3p	ENSG00000088451	TGDS
ENSG00000281692.1	PACRG-AS1	MIMAT0000099	hsa-miR-101-3p	ENSG00000105576	TNPO2
ENSG00000204860.4	FAM201A	MIMAT0000099	hsa-miR-101-3p	ENSG00000105576	TNPO2
ENSG00000204860.4	FAM201A	MIMAT0000099	hsa-miR-101-3p	ENSG00000160199	PKNOX1
ENSG00000204860.4	FAM201A	MIMAT0000099	hsa-miR-101-3p	ENSG00000177606	JUN
ENSG00000237978.4	KCNMB2-AS1	MIMAT0000099	hsa-miR-101-3p	ENSG00000119969	HELLS
ENSG00000204860.4	FAM201A	MIMAT0000099	hsa-miR-101-3p	ENSG00000158769	F11R
ENSG00000281692.1	PACRG-AS1	MIMAT0000099	hsa-miR-101-3p	ENSG00000143924	EML4
ENSG00000237978.4	KCNMB2-AS1	MIMAT0000099	hsa-miR-101-3p	ENSG00000105576	TNPO2
ENSG00000237978.4	KCNMB2-AS1	MIMAT0000099	hsa-miR-101-3p	ENSG00000129173	E2F8
ENSG00000255727.1	LINC01489	MIMAT0000099	hsa-miR-101-3p	ENSG00000109586	GALNT7
ENSG00000204860.4	FAM201A	MIMAT0000099	hsa-miR-101-3p	ENSG00000105976	MET
ENSG00000204860.4	FAM201A	MIMAT0000099	hsa-miR-101-3p	ENSG00000088451	TGDS
ENSG00000281692.1	PACRG-AS1	MIMAT0000099	hsa-miR-101-3p	ENSG00000090104	RGS1
ENSG00000237978.4	KCNMB2-AS1	MIMAT0000099	hsa-miR-101-3p	ENSG00000104067	TJP1
ENSG00000242282.5	AC108488.4	MIMAT0000099	hsa-miR-101-3p	ENSG00000012048	BRCA1
ENSG00000242282.5	AC108488.4	MIMAT0000099	hsa-miR-101-3p	ENSG00000160199	PKNOX1
ENSG00000235142.6	RP1-60O19.1	MIMAT0000099	hsa-miR-101-3p	ENSG00000146648	EGFR
ENSG00000255727.1	LINC01489	MIMAT0000099	hsa-miR-101-3p	ENSG00000088451	TGDS
ENSG00000281692.1	PACRG-AS1	MIMAT0000099	hsa-miR-101-3p	ENSG00000152601	MBNL1
ENSG00000242282.5	AC108488.4	MIMAT0000099	hsa-miR-101-3p	ENSG00000172575	RASGRP1
ENSG00000227028.5	SLC8A1-AS1	MIMAT0000099	hsa-miR-101-3p	ENSG00000104067	TJP1
ENSG00000235142.6	RP1-60O19.1	MIMAT0000099	hsa-miR-101-3p	ENSG00000090104	RGS1
ENSG00000204860.4	FAM201A	MIMAT0000099	hsa-miR-101-3p	ENSG00000135720	DYNC1LI2
ENSG00000237978.4	KCNMB2-AS1	MIMAT0000099	hsa-miR-101-3p	ENSG00000135720	DYNC1LI2
ENSG00000242282.5	AC108488.4	MIMAT0000099	hsa-miR-101-3p	ENSG00000152601	MBNL1
ENSG00000237978.4	KCNMB2-AS1	MIMAT0000099	hsa-miR-101-3p	ENSG00000012048	BRCA1
ENSG00000255727.1	LINC01489	MIMAT0000099	hsa-miR-101-3p	ENSG00000129173	E2F8
ENSG00000227028.5	SLC8A1-AS1	MIMAT0000099	hsa-miR-101-3p	ENSG00000100554	ATP6V1D
ENSG00000204860.4	FAM201A	MIMAT0000099	hsa-miR-101-3p	ENSG00000119969	HELLS
ENSG00000227028.5	SLC8A1-AS1	MIMAT0000099	hsa-miR-101-3p	ENSG00000136040	PLXNC1
ENSG00000281692.1	PACRG-AS1	MIMAT0000099	hsa-miR-101-3p	ENSG00000100554	ATP6V1D
ENSG00000255727.1	LINC01489	MIMAT0000099	hsa-miR-101-3p	ENSG00000166086	JAM3
ENSG00000227028.5	SLC8A1-AS1	MIMAT0000099	hsa-miR-101-3p	ENSG00000160199	PKNOX1
ENSG00000235142.6	RP1-60O19.1	MIMAT0000099	hsa-miR-101-3p	ENSG00000125740	FOSB
ENSG00000242282.5	AC108488.4	MIMAT0000099	hsa-miR-101-3p	ENSG00000104067	TJP1
ENSG00000227028.5	SLC8A1-AS1	MIMAT0000099	hsa-miR-101-3p	ENSG00000058804	NDC1
ENSG00000204860.4	FAM201A	MIMAT0000099	hsa-miR-101-3p	ENSG00000118513	MYB
ENSG00000237978.4	KCNMB2-AS1	MIMAT0000099	hsa-miR-101-3p	ENSG00000090889	KIF4A
ENSG00000281692.1	PACRG-AS1	MIMAT0000099	hsa-miR-101-3p	ENSG00000012048	BRCA1
ENSG00000237978.4	KCNMB2-AS1	MIMAT0000099	hsa-miR-101-3p	ENSG00000166086	JAM3
ENSG00000281692.1	PACRG-AS1	MIMAT0000099	hsa-miR-101-3p	ENSG00000169429	CXCL8
ENSG00000237978.4	KCNMB2-AS1	MIMAT0000099	hsa-miR-101-3p	ENSG00000100554	ATP6V1D
ENSG00000281692.1	PACRG-AS1	MIMAT0000099	hsa-miR-101-3p	ENSG00000276043	UHRF1
ENSG00000227028.5	SLC8A1-AS1	MIMAT0000099	hsa-miR-101-3p	ENSG00000158769	F11R
ENSG00000237978.4	KCNMB2-AS1	MIMAT0000099	hsa-miR-101-3p	ENSG00000276043	UHRF1
ENSG00000237978.4	KCNMB2-AS1	MIMAT0000099	hsa-miR-101-3p	ENSG00000169429	CXCL8
ENSG00000242282.5	AC108488.4	MIMAT0000099	hsa-miR-101-3p	ENSG00000024526	DEPDC1
ENSG00000255727.1	LINC01489	MIMAT0000099	hsa-miR-101-3p	ENSG00000143924	EML4
ENSG00000227028.5	SLC8A1-AS1	MIMAT0000099	hsa-miR-101-3p	ENSG00000276043	UHRF1
ENSG00000235142.6	RP1-60O19.1	MIMAT0000099	hsa-miR-101-3p	ENSG00000088451	TGDS
ENSG00000237978.4	KCNMB2-AS1	MIMAT0000099	hsa-miR-101-3p	ENSG00000118513	MYB
ENSG00000204860.4	FAM201A	MIMAT0000099	hsa-miR-101-3p	ENSG00000104067	TJP1
ENSG00000237978.4	KCNMB2-AS1	MIMAT0000099	hsa-miR-101-3p	ENSG00000113448	PDE4D
ENSG00000204860.4	FAM201A	MIMAT0000099	hsa-miR-101-3p	ENSG00000107779	BMPR1A
ENSG00000227028.5	SLC8A1-AS1	MIMAT0000099	hsa-miR-101-3p	ENSG00000024526	DEPDC1
ENSG00000204860.4	FAM201A	MIMAT0000099	hsa-miR-101-3p	ENSG00000012048	BRCA1
ENSG00000281692.1	PACRG-AS1	MIMAT0000099	hsa-miR-101-3p	ENSG00000088451	TGDS
ENSG00000204860.4	FAM201A	MIMAT0000099	hsa-miR-101-3p	ENSG00000109586	GALNT7
ENSG00000255727.1	LINC01489	MIMAT0000099	hsa-miR-101-3p	ENSG00000276043	UHRF1
ENSG00000235142.6	RP1-60O19.1	MIMAT0000099	hsa-miR-101-3p	ENSG00000105976	MET
ENSG00000227028.5	SLC8A1-AS1	MIMAT0000099	hsa-miR-101-3p	ENSG00000146648	EGFR
ENSG00000227028.5	SLC8A1-AS1	MIMAT0000099	hsa-miR-101-3p	ENSG00000090889	KIF4A
ENSG00000242282.5	AC108488.4	MIMAT0000099	hsa-miR-101-3p	ENSG00000146648	EGFR
ENSG00000255727.1	LINC01489	MIMAT0000099	hsa-miR-101-3p	ENSG00000135720	DYNC1LI2
ENSG00000227028.5	SLC8A1-AS1	MIMAT0000099	hsa-miR-101-3p	ENSG00000129173	E2F8
ENSG00000204860.4	FAM201A	MIMAT0000099	hsa-miR-101-3p	ENSG00000090889	KIF4A
ENSG00000237978.4	KCNMB2-AS1	MIMAT0000099	hsa-miR-101-3p	ENSG00000058804	NDC1
ENSG00000281692.1	PACRG-AS1	MIMAT0000099	hsa-miR-101-3p	ENSG00000146648	EGFR
ENSG00000281692.1	PACRG-AS1	MIMAT0000099	hsa-miR-101-3p	ENSG00000160199	PKNOX1
ENSG00000227028.5	SLC8A1-AS1	MIMAT0000099	hsa-miR-101-3p	ENSG00000107779	BMPR1A
ENSG00000235142.6	RP1-60O19.1	MIMAT0000099	hsa-miR-101-3p	ENSG00000136040	PLXNC1
ENSG00000242282.5	AC108488.4	MIMAT0000099	hsa-miR-101-3p	ENSG00000090104	RGS1
ENSG00000227028.5	SLC8A1-AS1	MIMAT0000099	hsa-miR-101-3p	ENSG00000090104	RGS1
ENSG00000235142.6	RP1-60O19.1	MIMAT0000099	hsa-miR-101-3p	ENSG00000118513	MYB
ENSG00000204860.4	FAM201A	MIMAT0000099	hsa-miR-101-3p	ENSG00000058804	NDC1
ENSG00000255727.1	LINC01489	MIMAT0000099	hsa-miR-101-3p	ENSG00000104067	TJP1
ENSG00000235142.6	RP1-60O19.1	MIMAT0000099	hsa-miR-101-3p	ENSG00000160199	PKNOX1
ENSG00000281692.1	PACRG-AS1	MIMAT0000099	hsa-miR-101-3p	ENSG00000105976	MET
ENSG00000237978.4	KCNMB2-AS1	MIMAT0000099	hsa-miR-101-3p	ENSG00000110917	MLEC
ENSG00000242282.5	AC108488.4	MIMAT0000099	hsa-miR-101-3p	ENSG00000058804	NDC1
ENSG00000237978.4	KCNMB2-AS1	MIMAT0000099	hsa-miR-101-3p	ENSG00000152601	MBNL1
ENSG00000237978.4	KCNMB2-AS1	MIMAT0000099	hsa-miR-101-3p	ENSG00000109586	GALNT7
ENSG00000281692.1	PACRG-AS1	MIMAT0000099	hsa-miR-101-3p	ENSG00000104067	TJP1
ENSG00000204860.4	FAM201A	MIMAT0000099	hsa-miR-101-3p	ENSG00000125740	FOSB
ENSG00000204860.4	FAM201A	MIMAT0000099	hsa-miR-101-3p	ENSG00000136040	PLXNC1
ENSG00000237978.4	KCNMB2-AS1	MIMAT0000099	hsa-miR-101-3p	ENSG00000158769	F11R
ENSG00000227028.5	SLC8A1-AS1	MIMAT0000099	hsa-miR-101-3p	ENSG00000169429	CXCL8
ENSG00000227028.5	SLC8A1-AS1	MIMAT0000099	hsa-miR-101-3p	ENSG00000118513	MYB
ENSG00000242282.5	AC108488.4	MIMAT0000099	hsa-miR-101-3p	ENSG00000118513	MYB
ENSG00000204860.4	FAM201A	MIMAT0000099	hsa-miR-101-3p	ENSG00000152601	MBNL1
ENSG00000227028.5	SLC8A1-AS1	MIMAT0000099	hsa-miR-101-3p	ENSG00000113448	PDE4D
ENSG00000227028.5	SLC8A1-AS1	MIMAT0000099	hsa-miR-101-3p	ENSG00000119969	HELLS
ENSG00000237978.4	KCNMB2-AS1	MIMAT0000099	hsa-miR-101-3p	ENSG00000146648	EGFR
ENSG00000281692.1	PACRG-AS1	MIMAT0000099	hsa-miR-101-3p	ENSG00000136040	PLXNC1
ENSG00000281692.1	PACRG-AS1	MIMAT0000099	hsa-miR-101-3p	ENSG00000177606	JUN
ENSG00000242282.5	AC108488.4	MIMAT0000099	hsa-miR-101-3p	ENSG00000129173	E2F8
ENSG00000242282.5	AC108488.4	MIMAT0000099	hsa-miR-101-3p	ENSG00000158769	F11R
ENSG00000235142.6	RP1-60O19.1	MIMAT0000099	hsa-miR-101-3p	ENSG00000105576	TNPO2
ENSG00000242282.5	AC108488.4	MIMAT0000099	hsa-miR-101-3p	ENSG00000119969	HELLS
ENSG00000235142.6	RP1-60O19.1	MIMAT0000099	hsa-miR-101-3p	ENSG00000172575	RASGRP1
ENSG00000227028.5	SLC8A1-AS1	MIMAT0000099	hsa-miR-101-3p	ENSG00000152601	MBNL1
ENSG00000227028.5	SLC8A1-AS1	MIMAT0000099	hsa-miR-101-3p	ENSG00000088451	TGDS
ENSG00000281692.1	PACRG-AS1	MIMAT0000099	hsa-miR-101-3p	ENSG00000166086	JAM3
ENSG00000242282.5	AC108488.4	MIMAT0000099	hsa-miR-101-3p	ENSG00000113448	PDE4D
ENSG00000237978.4	KCNMB2-AS1	MIMAT0000099	hsa-miR-101-3p	ENSG00000136040	PLXNC1
ENSG00000237978.4	KCNMB2-AS1	MIMAT0000099	hsa-miR-101-3p	ENSG00000107779	BMPR1A
ENSG00000242282.5	AC108488.4	MIMAT0000099	hsa-miR-101-3p	ENSG00000276043	UHRF1
ENSG00000227028.5	SLC8A1-AS1	MIMAT0000099	hsa-miR-101-3p	ENSG00000135720	DYNC1LI2
ENSG00000281692.1	PACRG-AS1	MIMAT0000099	hsa-miR-101-3p	ENSG00000058804	NDC1
ENSG00000281692.1	PACRG-AS1	MIMAT0000099	hsa-miR-101-3p	ENSG00000125740	FOSB
ENSG00000255727.1	LINC01489	MIMAT0000099	hsa-miR-101-3p	ENSG00000024526	DEPDC1
ENSG00000255727.1	LINC01489	MIMAT0000099	hsa-miR-101-3p	ENSG00000158769	F11R
ENSG00000255727.1	LINC01489	MIMAT0000099	hsa-miR-101-3p	ENSG00000113448	PDE4D
ENSG00000237978.4	KCNMB2-AS1	MIMAT0000099	hsa-miR-101-3p	ENSG00000125740	FOSB
ENSG00000255727.1	LINC01489	MIMAT0000099	hsa-miR-101-3p	ENSG00000107779	BMPR1A
ENSG00000242282.5	AC108488.4	MIMAT0000099	hsa-miR-101-3p	ENSG00000125740	FOSB
ENSG00000255727.1	LINC01489	MIMAT0000099	hsa-miR-101-3p	ENSG00000012048	BRCA1
ENSG00000242282.5	AC108488.4	MIMAT0000099	hsa-miR-101-3p	ENSG00000090889	KIF4A
ENSG00000281692.1	PACRG-AS1	MIMAT0000099	hsa-miR-101-3p	ENSG00000113448	PDE4D
ENSG00000227028.5	SLC8A1-AS1	MIMAT0000099	hsa-miR-101-3p	ENSG00000105576	TNPO2
ENSG00000281692.1	PACRG-AS1	MIMAT0000099	hsa-miR-101-3p	ENSG00000109586	GALNT7
ENSG00000242282.5	AC108488.4	MIMAT0000099	hsa-miR-101-3p	ENSG00000110917	MLEC
ENSG00000204860.4	FAM201A	MIMAT0000099	hsa-miR-101-3p	ENSG00000172575	RASGRP1
ENSG00000242282.5	AC108488.4	MIMAT0000099	hsa-miR-101-3p	ENSG00000136040	PLXNC1
ENSG00000242282.5	AC108488.4	MIMAT0000099	hsa-miR-101-3p	ENSG00000088451	TGDS
ENSG00000237978.4	KCNMB2-AS1	MIMAT0000099	hsa-miR-101-3p	ENSG00000090104	RGS1
ENSG00000237978.4	KCNMB2-AS1	MIMAT0000099	hsa-miR-101-3p	ENSG00000024526	DEPDC1
ENSG00000235142.6	RP1-60O19.1	MIMAT0000099	hsa-miR-101-3p	ENSG00000143924	EML4
ENSG00000227028.5	SLC8A1-AS1	MIMAT0000099	hsa-miR-101-3p	ENSG00000115415	STAT1
ENSG00000235142.6	RP1-60O19.1	MIMAT0000099	hsa-miR-101-3p	ENSG00000058804	NDC1
ENSG00000255727.1	LINC01489	MIMAT0000099	hsa-miR-101-3p	ENSG00000136040	PLXNC1
ENSG00000227028.5	SLC8A1-AS1	MIMAT0000099	hsa-miR-101-3p	ENSG00000110917	MLEC
ENSG00000237978.4	KCNMB2-AS1	MIMAT0000099	hsa-miR-101-3p	ENSG00000115415	STAT1
ENSG00000227028.5	SLC8A1-AS1	MIMAT0000099	hsa-miR-101-3p	ENSG00000012048	BRCA1
ENSG00000255727.1	LINC01489	MIMAT0000099	hsa-miR-101-3p	ENSG00000115415	STAT1
ENSG00000204860.4	FAM201A	MIMAT0000099	hsa-miR-101-3p	ENSG00000276043	UHRF1
ENSG00000255727.1	LINC01489	MIMAT0000099	hsa-miR-101-3p	ENSG00000146648	EGFR
ENSG00000255727.1	LINC01489	MIMAT0000099	hsa-miR-101-3p	ENSG00000105576	TNPO2
ENSG00000281692.1	PACRG-AS1	MIMAT0000099	hsa-miR-101-3p	ENSG00000115415	STAT1
ENSG00000281692.1	PACRG-AS1	MIMAT0000099	hsa-miR-101-3p	ENSG00000118513	MYB
ENSG00000255727.1	LINC01489	MIMAT0000099	hsa-miR-101-3p	ENSG00000160199	PKNOX1
ENSG00000227028.5	SLC8A1-AS1	MIMAT0000099	hsa-miR-101-3p	ENSG00000105976	MET
ENSG00000227028.5	SLC8A1-AS1	MIMAT0000099	hsa-miR-101-3p	ENSG00000143924	EML4
ENSG00000255727.1	LINC01489	MIMAT0000099	hsa-miR-101-3p	ENSG00000090104	RGS1
ENSG00000281692.1	PACRG-AS1	MIMAT0000099	hsa-miR-101-3p	ENSG00000090889	KIF4A
ENSG00000204860.4	FAM201A	MIMAT0000099	hsa-miR-101-3p	ENSG00000113448	PDE4D
ENSG00000227028.5	SLC8A1-AS1	MIMAT0000099	hsa-miR-101-3p	ENSG00000125740	FOSB
ENSG00000242282.5	AC108488.4	MIMAT0000099	hsa-miR-101-3p	ENSG00000107779	BMPR1A
ENSG00000204860.4	FAM201A	MIMAT0000099	hsa-miR-101-3p	ENSG00000100554	ATP6V1D
ENSG00000204860.4	FAM201A	MIMAT0000099	hsa-miR-101-3p	ENSG00000090104	RGS1
ENSG00000242282.5	AC108488.4	MIMAT0000099	hsa-miR-101-3p	ENSG00000105576	TNPO2
ENSG00000281692.1	PACRG-AS1	MIMAT0000099	hsa-miR-101-3p	ENSG00000129173	E2F8
ENSG00000204860.4	FAM201A	MIMAT0000099	hsa-miR-101-3p	ENSG00000146648	EGFR
ENSG00000255727.1	LINC01489	MIMAT0000099	hsa-miR-101-3p	ENSG00000100554	ATP6V1D
ENSG00000235142.6	RP1-60O19.1	MIMAT0000099	hsa-miR-101-3p	ENSG00000012048	BRCA1
ENSG00000235142.6	RP1-60O19.1	MIMAT0000099	hsa-miR-101-3p	ENSG00000135720	DYNC1LI2
ENSG00000235142.6	RP1-60O19.1	MIMAT0000099	hsa-miR-101-3p	ENSG00000119969	HELLS
ENSG00000242282.5	AC108488.4	MIMAT0000099	hsa-miR-101-3p	ENSG00000177606	JUN
ENSG00000235142.6	RP1-60O19.1	MIMAT0000099	hsa-miR-101-3p	ENSG00000024526	DEPDC1
ENSG00000235142.6	RP1-60O19.1	MIMAT0000099	hsa-miR-101-3p	ENSG00000166086	JAM3
ENSG00000281692.1	PACRG-AS1	MIMAT0000099	hsa-miR-101-3p	ENSG00000024526	DEPDC1
ENSG00000281692.1	PACRG-AS1	MIMAT0000099	hsa-miR-101-3p	ENSG00000110917	MLEC
ENSG00000204860.4	FAM201A	MIMAT0000099	hsa-miR-101-3p	ENSG00000129173	E2F8
ENSG00000227028.5	SLC8A1-AS1	MIMAT0000099	hsa-miR-101-3p	ENSG00000172575	RASGRP1
ENSG00000281692.1	PACRG-AS1	MIMAT0000099	hsa-miR-101-3p	ENSG00000172575	RASGRP1
ENSG00000235142.6	RP1-60O19.1	MIMAT0000099	hsa-miR-101-3p	ENSG00000110917	MLEC
ENSG00000237978.4	KCNMB2-AS1	MIMAT0000099	hsa-miR-101-3p	ENSG00000143924	EML4
ENSG00000255727.1	LINC01489	MIMAT0000099	hsa-miR-101-3p	ENSG00000125740	FOSB
ENSG00000235142.6	RP1-60O19.1	MIMAT0000099	hsa-miR-101-3p	ENSG00000276043	UHRF1
ENSG00000255727.1	LINC01489	MIMAT0000099	hsa-miR-101-3p	ENSG00000119969	HELLS
ENSG00000235142.6	RP1-60O19.1	MIMAT0000099	hsa-miR-101-3p	ENSG00000100554	ATP6V1D
ENSG00000255727.1	LINC01489	MIMAT0000099	hsa-miR-101-3p	ENSG00000118513	MYB
ENSG00000204860.4	FAM201A	MIMAT0000099	hsa-miR-101-3p	ENSG00000115415	STAT1
ENSG00000204860.4	FAM201A	MIMAT0000099	hsa-miR-101-3p	ENSG00000143924	EML4
ENSG00000237978.4	KCNMB2-AS1	MIMAT0000099	hsa-miR-101-3p	ENSG00000172575	RASGRP1
ENSG00000242282.5	AC108488.4	MIMAT0000099	hsa-miR-101-3p	ENSG00000105976	MET
ENSG00000237978.4	KCNMB2-AS1	MIMAT0000099	hsa-miR-101-3p	ENSG00000105976	MET
ENSG00000242282.5	AC108488.4	MIMAT0000099	hsa-miR-101-3p	ENSG00000135720	DYNC1LI2
ENSG00000235142.6	RP1-60O19.1	MIMAT0000099	hsa-miR-101-3p	ENSG00000090889	KIF4A
ENSG00000237978.4	KCNMB2-AS1	MIMAT0000099	hsa-miR-101-3p	ENSG00000160199	PKNOX1
ENSG00000237978.4	KCNMB2-AS1	MIMAT0000099	hsa-miR-101-3p	ENSG00000177606	JUN
ENSG00000235142.6	RP1-60O19.1	MIMAT0000099	hsa-miR-101-3p	ENSG00000115415	STAT1
ENSG00000235142.6	RP1-60O19.1	MIMAT0000099	hsa-miR-101-3p	ENSG00000113448	PDE4D
ENSG00000235142.6	RP1-60O19.1	MIMAT0000099	hsa-miR-101-3p	ENSG00000107779	BMPR1A
ENSG00000255727.1	LINC01489	MIMAT0000099	hsa-miR-101-3p	ENSG00000169429	CXCL8
ENSG00000242282.5	AC108488.4	MIMAT0000099	hsa-miR-101-3p	ENSG00000115415	STAT1
ENSG00000235142.6	RP1-60O19.1	MIMAT0000099	hsa-miR-101-3p	ENSG00000177606	JUN
ENSG00000255727.1	LINC01489	MIMAT0000099	hsa-miR-101-3p	ENSG00000110917	MLEC
ENSG00000204860.4	FAM201A	MIMAT0000099	hsa-miR-101-3p	ENSG00000110917	MLEC
ENSG00000255727.1	LINC01489	MIMAT0000099	hsa-miR-101-3p	ENSG00000177606	JUN
ENSG00000255727.1	LINC01489	MIMAT0000099	hsa-miR-101-3p	ENSG00000058804	NDC1
ENSG00000242282.5	AC108488.4	MIMAT0000099	hsa-miR-101-3p	ENSG00000169429	CXCL8
ENSG00000242282.5	AC108488.4	MIMAT0000099	hsa-miR-101-3p	ENSG00000143924	EML4
ENSG00000242282.5	AC108488.4	MIMAT0000099	hsa-miR-101-3p	ENSG00000100554	ATP6V1D
ENSG00000281692.1	PACRG-AS1	MIMAT0000099	hsa-miR-101-3p	ENSG00000158769	F11R
ENSG00000204860.4	FAM201A	MIMAT0000099	hsa-miR-101-3p	ENSG00000169429	CXCL8
ENSG00000255727.1	LINC01489	MIMAT0000099	hsa-miR-101-3p	ENSG00000105976	MET
ENSG00000255727.1	LINC01489	MIMAT0000099	hsa-miR-101-3p	ENSG00000090889	KIF4A
ENSG00000242282.5	AC108488.4	MIMAT0000099	hsa-miR-101-3p	ENSG00000166086	JAM3
ENSG00000255727.1	LINC01489	MIMAT0000099	hsa-miR-101-3p	ENSG00000172575	RASGRP1
ENSG00000255727.1	LINC01489	MIMAT0000099	hsa-miR-101-3p	ENSG00000152601	MBNL1
ENSG00000235142.6	RP1-60O19.1	MIMAT0000099	hsa-miR-101-3p	ENSG00000152601	MBNL1
ENSG00000281692.1	PACRG-AS1	MIMAT0000099	hsa-miR-101-3p	ENSG00000107779	BMPR1A
ENSG00000281692.1	PACRG-AS1	MIMAT0000099	hsa-miR-101-3p	ENSG00000119969	HELLS
ENSG00000235142.6	RP1-60O19.1	MIMAT0000099	hsa-miR-101-3p	ENSG00000129173	E2F8
ENSG00000227028.5	SLC8A1-AS1	MIMAT0000099	hsa-miR-101-3p	ENSG00000177606	JUN
ENSG00000235142.6	RP1-60O19.1	MIMAT0000099	hsa-miR-101-3p	ENSG00000158769	F11R
ENSG00000242282.5	AC108488.4	MIMAT0000099	hsa-miR-101-3p	ENSG00000109586	GALNT7
ENSG00000281692.1	PACRG-AS1	MIMAT0000099	hsa-miR-101-3p	ENSG00000135720	DYNC1LI2
ENSG00000235142.6	RP1-60O19.1	MIMAT0000099	hsa-miR-101-3p	ENSG00000109586	GALNT7
ENSG00000235142.6	RP1-60O19.1	MIMAT0000099	hsa-miR-101-3p	ENSG00000104067	TJP1
ENSG00000235142.6	RP1-60O19.1	MIMAT0000099	hsa-miR-101-3p	ENSG00000169429	CXCL8
ENSG00000227028.5	SLC8A1-AS1	MIMAT0000099	hsa-miR-101-3p	ENSG00000166086	JAM3
ENSG00000227028.5	SLC8A1-AS1	MIMAT0000099	hsa-miR-101-3p	ENSG00000109586	GALNT7
ENSG00000233203.5	RP11-67L3.4	MIMAT0000253	hsa-miR-10a-5p	ENSG00000176208	ATAD5
ENSG00000239213.4	NCK1-AS1	MIMAT0000253	hsa-miR-10a-5p	ENSG00000011426	ANLN
ENSG00000233203.5	RP11-67L3.4	MIMAT0000253	hsa-miR-10a-5p	ENSG00000169429	CXCL8
ENSG00000233203.5	RP11-67L3.4	MIMAT0000253	hsa-miR-10a-5p	ENSG00000172575	RASGRP1
ENSG00000233203.5	RP11-67L3.4	MIMAT0000253	hsa-miR-10a-5p	ENSG00000172081	MOB3A
ENSG00000233203.5	RP11-67L3.4	MIMAT0000253	hsa-miR-10a-5p	ENSG00000105976	MET
ENSG00000233203.5	RP11-67L3.4	MIMAT0000253	hsa-miR-10a-5p	ENSG00000135720	DYNC1LI2
ENSG00000214797.3	RP11-1036E20.9	MIMAT0000253	hsa-miR-10a-5p	ENSG00000125912	NCLN
ENSG00000233203.5	RP11-67L3.4	MIMAT0000253	hsa-miR-10a-5p	ENSG00000154096	THY1
ENSG00000239213.4	NCK1-AS1	MIMAT0000253	hsa-miR-10a-5p	ENSG00000172575	RASGRP1
ENSG00000233203.5	RP11-67L3.4	MIMAT0000253	hsa-miR-10a-5p	ENSG00000110917	MLEC
ENSG00000233203.5	RP11-67L3.4	MIMAT0000253	hsa-miR-10a-5p	ENSG00000158769	F11R
ENSG00000239213.4	NCK1-AS1	MIMAT0000253	hsa-miR-10a-5p	ENSG00000154096	THY1
ENSG00000214797.3	RP11-1036E20.9	MIMAT0000253	hsa-miR-10a-5p	ENSG00000172081	MOB3A
ENSG00000214797.3	RP11-1036E20.9	MIMAT0000253	hsa-miR-10a-5p	ENSG00000105976	MET
ENSG00000233203.5	RP11-67L3.4	MIMAT0000253	hsa-miR-10a-5p	ENSG00000186517	ARHGAP30
ENSG00000233203.5	RP11-67L3.4	MIMAT0000253	hsa-miR-10a-5p	ENSG00000105576	TNPO2
ENSG00000214797.3	RP11-1036E20.9	MIMAT0000253	hsa-miR-10a-5p	ENSG00000160199	PKNOX1
ENSG00000239213.4	NCK1-AS1	MIMAT0000253	hsa-miR-10a-5p	ENSG00000176208	ATAD5
ENSG00000214797.3	RP11-1036E20.9	MIMAT0000253	hsa-miR-10a-5p	ENSG00000011426	ANLN
ENSG00000239213.4	NCK1-AS1	MIMAT0000253	hsa-miR-10a-5p	ENSG00000125912	NCLN
ENSG00000214797.3	RP11-1036E20.9	MIMAT0000253	hsa-miR-10a-5p	ENSG00000186517	ARHGAP30
ENSG00000214797.3	RP11-1036E20.9	MIMAT0000253	hsa-miR-10a-5p	ENSG00000105576	TNPO2
ENSG00000239213.4	NCK1-AS1	MIMAT0000253	hsa-miR-10a-5p	ENSG00000110917	MLEC
ENSG00000214797.3	RP11-1036E20.9	MIMAT0000253	hsa-miR-10a-5p	ENSG00000110917	MLEC
ENSG00000239213.4	NCK1-AS1	MIMAT0000253	hsa-miR-10a-5p	ENSG00000135720	DYNC1LI2
ENSG00000233203.5	RP11-67L3.4	MIMAT0000253	hsa-miR-10a-5p	ENSG00000011426	ANLN
ENSG00000214797.3	RP11-1036E20.9	MIMAT0000253	hsa-miR-10a-5p	ENSG00000176208	ATAD5
ENSG00000233203.5	RP11-67L3.4	MIMAT0000253	hsa-miR-10a-5p	ENSG00000166086	JAM3
ENSG00000233203.5	RP11-67L3.4	MIMAT0000253	hsa-miR-10a-5p	ENSG00000160199	PKNOX1
ENSG00000214797.3	RP11-1036E20.9	MIMAT0000253	hsa-miR-10a-5p	ENSG00000158769	F11R
ENSG00000239213.4	NCK1-AS1	MIMAT0000253	hsa-miR-10a-5p	ENSG00000169429	CXCL8
ENSG00000214797.3	RP11-1036E20.9	MIMAT0000253	hsa-miR-10a-5p	ENSG00000169429	CXCL8
ENSG00000214797.3	RP11-1036E20.9	MIMAT0000253	hsa-miR-10a-5p	ENSG00000166086	JAM3
ENSG00000233203.5	RP11-67L3.4	MIMAT0000253	hsa-miR-10a-5p	ENSG00000125912	NCLN
ENSG00000239213.4	NCK1-AS1	MIMAT0000253	hsa-miR-10a-5p	ENSG00000105976	MET
ENSG00000239213.4	NCK1-AS1	MIMAT0000253	hsa-miR-10a-5p	ENSG00000172081	MOB3A
ENSG00000239213.4	NCK1-AS1	MIMAT0000253	hsa-miR-10a-5p	ENSG00000160199	PKNOX1
ENSG00000214797.3	RP11-1036E20.9	MIMAT0000253	hsa-miR-10a-5p	ENSG00000154096	THY1
ENSG00000214797.3	RP11-1036E20.9	MIMAT0000253	hsa-miR-10a-5p	ENSG00000172575	RASGRP1
ENSG00000239213.4	NCK1-AS1	MIMAT0000253	hsa-miR-10a-5p	ENSG00000105576	TNPO2
ENSG00000239213.4	NCK1-AS1	MIMAT0000253	hsa-miR-10a-5p	ENSG00000166086	JAM3
ENSG00000239213.4	NCK1-AS1	MIMAT0000253	hsa-miR-10a-5p	ENSG00000186517	ARHGAP30
ENSG00000239213.4	NCK1-AS1	MIMAT0000253	hsa-miR-10a-5p	ENSG00000158769	F11R
ENSG00000214797.3	RP11-1036E20.9	MIMAT0000253	hsa-miR-10a-5p	ENSG00000135720	DYNC1LI2
ENSG00000266983.1	CTC-232P5.1	MIMAT0022724	hsa-miR-1277-5p	ENSG00000135365	PHF21A
ENSG00000266983.1	CTC-232P5.1	MIMAT0022724	hsa-miR-1277-5p	ENSG00000011426	ANLN
ENSG00000266983.1	CTC-232P5.1	MIMAT0022724	hsa-miR-1277-5p	ENSG00000024526	DEPDC1
ENSG00000266983.1	CTC-232P5.1	MIMAT0022724	hsa-miR-1277-5p	ENSG00000152601	MBNL1
ENSG00000266983.1	CTC-232P5.1	MIMAT0022724	hsa-miR-1277-5p	ENSG00000177606	JUN
ENSG00000266983.1	CTC-232P5.1	MIMAT0022724	hsa-miR-1277-5p	ENSG00000176208	ATAD5
ENSG00000266983.1	CTC-232P5.1	MIMAT0022724	hsa-miR-1277-5p	ENSG00000109586	GALNT7
ENSG00000266983.1	CTC-232P5.1	MIMAT0022724	hsa-miR-1277-5p	ENSG00000123358	NR4A1
ENSG00000266983.1	CTC-232P5.1	MIMAT0022724	hsa-miR-1277-5p	ENSG00000134874	DZIP1
ENSG00000266983.1	CTC-232P5.1	MIMAT0022724	hsa-miR-1277-5p	ENSG00000135905	DOCK10
ENSG00000266983.1	CTC-232P5.1	MIMAT0022724	hsa-miR-1277-5p	ENSG00000005249	PRKAR2B
ENSG00000266983.1	CTC-232P5.1	MIMAT0022724	hsa-miR-1277-5p	ENSG00000146648	EGFR
ENSG00000266983.1	CTC-232P5.1	MIMAT0022724	hsa-miR-1277-5p	ENSG00000176986	SEC24C
ENSG00000266983.1	CTC-232P5.1	MIMAT0022724	hsa-miR-1277-5p	ENSG00000129173	E2F8
ENSG00000266983.1	CTC-232P5.1	MIMAT0022724	hsa-miR-1277-5p	ENSG00000125740	FOSB
ENSG00000266983.1	CTC-232P5.1	MIMAT0022724	hsa-miR-1277-5p	ENSG00000153044	CENPH
ENSG00000266983.1	CTC-232P5.1	MIMAT0022724	hsa-miR-1277-5p	ENSG00000109339	MAPK10
ENSG00000266983.1	CTC-232P5.1	MIMAT0022724	hsa-miR-1277-5p	ENSG00000198554	WDHD1
ENSG00000266983.1	CTC-232P5.1	MIMAT0022724	hsa-miR-1277-5p	ENSG00000100906	NFKBIA
ENSG00000266983.1	CTC-232P5.1	MIMAT0022724	hsa-miR-1277-5p	ENSG00000107779	BMPR1A
ENSG00000266983.1	CTC-232P5.1	MIMAT0022724	hsa-miR-1277-5p	ENSG00000162654	GBP4
ENSG00000266983.1	CTC-232P5.1	MIMAT0022724	hsa-miR-1277-5p	ENSG00000152217	SETBP1
ENSG00000266983.1	CTC-232P5.1	MIMAT0022724	hsa-miR-1277-5p	ENSG00000156802	ATAD2
ENSG00000266983.1	CTC-232P5.1	MIMAT0022724	hsa-miR-1277-5p	ENSG00000119969	HELLS
ENSG00000266983.1	CTC-232P5.1	MIMAT0022724	hsa-miR-1277-5p	ENSG00000113448	PDE4D
ENSG00000266983.1	CTC-232P5.1	MIMAT0022724	hsa-miR-1277-5p	ENSG00000186187	ZNRF1
ENSG00000272831.1	RP11-792A8.4	MIMAT0000242	hsa-miR-129-5p	ENSG00000136040	PLXNC1
ENSG00000275560.1	RP11-180M15.7	MIMAT0000242	hsa-miR-129-5p	ENSG00000154096	THY1
ENSG00000272831.1	RP11-792A8.4	MIMAT0000242	hsa-miR-129-5p	ENSG00000143924	EML4
ENSG00000272473.1	AC006273.4	MIMAT0000242	hsa-miR-129-5p	ENSG00000119969	HELLS
ENSG00000175772.10	LINC01106	MIMAT0000242	hsa-miR-129-5p	ENSG00000254087	LYN
ENSG00000175772.10	LINC01106	MIMAT0000242	hsa-miR-129-5p	ENSG00000169429	CXCL8
ENSG00000272205.1	RP11-277B15.3	MIMAT0000242	hsa-miR-129-5p	ENSG00000012048	BRCA1
ENSG00000272831.1	RP11-792A8.4	MIMAT0000242	hsa-miR-129-5p	ENSG00000145244	CORIN
ENSG00000272831.1	RP11-792A8.4	MIMAT0000242	hsa-miR-129-5p	ENSG00000113448	PDE4D
ENSG00000272205.1	RP11-277B15.3	MIMAT0000242	hsa-miR-129-5p	ENSG00000163808	KIF15
ENSG00000272831.1	RP11-792A8.4	MIMAT0000242	hsa-miR-129-5p	ENSG00000109586	GALNT7
ENSG00000272205.1	RP11-277B15.3	MIMAT0000242	hsa-miR-129-5p	ENSG00000146648	EGFR
ENSG00000272831.1	RP11-792A8.4	MIMAT0000242	hsa-miR-129-5p	ENSG00000156802	ATAD2
ENSG00000275560.1	RP11-180M15.7	MIMAT0000242	hsa-miR-129-5p	ENSG00000105976	MET
ENSG00000275560.1	RP11-180M15.7	MIMAT0000242	hsa-miR-129-5p	ENSG00000119004	CYP20A1
ENSG00000272831.1	RP11-792A8.4	MIMAT0000242	hsa-miR-129-5p	ENSG00000104738	MCM4
ENSG00000175772.10	LINC01106	MIMAT0000242	hsa-miR-129-5p	ENSG00000104783	KCNN4
ENSG00000175772.10	LINC01106	MIMAT0000242	hsa-miR-129-5p	ENSG00000024526	DEPDC1
ENSG00000175772.10	LINC01106	MIMAT0000242	hsa-miR-129-5p	ENSG00000105976	MET
ENSG00000272831.1	RP11-792A8.4	MIMAT0000242	hsa-miR-129-5p	ENSG00000154096	THY1
ENSG00000175772.10	LINC01106	MIMAT0000242	hsa-miR-129-5p	ENSG00000119004	CYP20A1
ENSG00000272205.1	RP11-277B15.3	MIMAT0000242	hsa-miR-129-5p	ENSG00000119004	CYP20A1
ENSG00000272205.1	RP11-277B15.3	MIMAT0000242	hsa-miR-129-5p	ENSG00000156802	ATAD2
ENSG00000272205.1	RP11-277B15.3	MIMAT0000242	hsa-miR-129-5p	ENSG00000132530	XAF1
ENSG00000260711.2	RP11-747H7.3	MIMAT0000242	hsa-miR-129-5p	ENSG00000024526	DEPDC1
ENSG00000275560.1	RP11-180M15.7	MIMAT0000242	hsa-miR-129-5p	ENSG00000163820	FYCO1
ENSG00000182912.6	TSPEAR-AS2	MIMAT0000242	hsa-miR-129-5p	ENSG00000158769	F11R
ENSG00000182912.6	TSPEAR-AS2	MIMAT0000242	hsa-miR-129-5p	ENSG00000163808	KIF15
ENSG00000175772.10	LINC01106	MIMAT0000242	hsa-miR-129-5p	ENSG00000186187	ZNRF1
ENSG00000272473.1	AC006273.4	MIMAT0000242	hsa-miR-129-5p	ENSG00000109586	GALNT7
ENSG00000175772.10	LINC01106	MIMAT0000242	hsa-miR-129-5p	ENSG00000152217	SETBP1
ENSG00000275560.1	RP11-180M15.7	MIMAT0000242	hsa-miR-129-5p	ENSG00000134874	DZIP1
ENSG00000275560.1	RP11-180M15.7	MIMAT0000242	hsa-miR-129-5p	ENSG00000156802	ATAD2
ENSG00000272205.1	RP11-277B15.3	MIMAT0000242	hsa-miR-129-5p	ENSG00000024526	DEPDC1
ENSG00000272831.1	RP11-792A8.4	MIMAT0000242	hsa-miR-129-5p	ENSG00000012048	BRCA1
ENSG00000272831.1	RP11-792A8.4	MIMAT0000242	hsa-miR-129-5p	ENSG00000105576	TNPO2
ENSG00000224899.1	RP11-3B12.5	MIMAT0000242	hsa-miR-129-5p	ENSG00000110917	MLEC
ENSG00000275560.1	RP11-180M15.7	MIMAT0000242	hsa-miR-129-5p	ENSG00000254087	LYN
ENSG00000272205.1	RP11-277B15.3	MIMAT0000242	hsa-miR-129-5p	ENSG00000158769	F11R
ENSG00000272473.1	AC006273.4	MIMAT0000242	hsa-miR-129-5p	ENSG00000113448	PDE4D
ENSG00000272831.1	RP11-792A8.4	MIMAT0000242	hsa-miR-129-5p	ENSG00000163820	FYCO1
ENSG00000272473.1	AC006273.4	MIMAT0000242	hsa-miR-129-5p	ENSG00000176208	ATAD5
ENSG00000275560.1	RP11-180M15.7	MIMAT0000242	hsa-miR-129-5p	ENSG00000105576	TNPO2
ENSG00000175772.10	LINC01106	MIMAT0000242	hsa-miR-129-5p	ENSG00000152601	MBNL1
ENSG00000272205.1	RP11-277B15.3	MIMAT0000242	hsa-miR-129-5p	ENSG00000105976	MET
ENSG00000175772.10	LINC01106	MIMAT0000242	hsa-miR-129-5p	ENSG00000136040	PLXNC1
ENSG00000272831.1	RP11-792A8.4	MIMAT0000242	hsa-miR-129-5p	ENSG00000119969	HELLS
ENSG00000260711.2	RP11-747H7.3	MIMAT0000242	hsa-miR-129-5p	ENSG00000145244	CORIN
ENSG00000224899.1	RP11-3B12.5	MIMAT0000242	hsa-miR-129-5p	ENSG00000119969	HELLS
ENSG00000272831.1	RP11-792A8.4	MIMAT0000242	hsa-miR-129-5p	ENSG00000163808	KIF15
ENSG00000272831.1	RP11-792A8.4	MIMAT0000242	hsa-miR-129-5p	ENSG00000105976	MET
ENSG00000272205.1	RP11-277B15.3	MIMAT0000242	hsa-miR-129-5p	ENSG00000104738	MCM4
ENSG00000275560.1	RP11-180M15.7	MIMAT0000242	hsa-miR-129-5p	ENSG00000100906	NFKBIA
ENSG00000275560.1	RP11-180M15.7	MIMAT0000242	hsa-miR-129-5p	ENSG00000163808	KIF15
ENSG00000175772.10	LINC01106	MIMAT0000242	hsa-miR-129-5p	ENSG00000160199	PKNOX1
ENSG00000272473.1	AC006273.4	MIMAT0000242	hsa-miR-129-5p	ENSG00000136040	PLXNC1
ENSG00000272205.1	RP11-277B15.3	MIMAT0000242	hsa-miR-129-5p	ENSG00000154920	EME1
ENSG00000272831.1	RP11-792A8.4	MIMAT0000242	hsa-miR-129-5p	ENSG00000176208	ATAD5
ENSG00000272473.1	AC006273.4	MIMAT0000242	hsa-miR-129-5p	ENSG00000145244	CORIN
ENSG00000275560.1	RP11-180M15.7	MIMAT0000242	hsa-miR-129-5p	ENSG00000012048	BRCA1
ENSG00000272205.1	RP11-277B15.3	MIMAT0000242	hsa-miR-129-5p	ENSG00000152217	SETBP1
ENSG00000275560.1	RP11-180M15.7	MIMAT0000242	hsa-miR-129-5p	ENSG00000104783	KCNN4
ENSG00000275560.1	RP11-180M15.7	MIMAT0000242	hsa-miR-129-5p	ENSG00000104738	MCM4
ENSG00000275560.1	RP11-180M15.7	MIMAT0000242	hsa-miR-129-5p	ENSG00000119969	HELLS
ENSG00000272831.1	RP11-792A8.4	MIMAT0000242	hsa-miR-129-5p	ENSG00000110917	MLEC
ENSG00000182912.6	TSPEAR-AS2	MIMAT0000242	hsa-miR-129-5p	ENSG00000113448	PDE4D
ENSG00000272205.1	RP11-277B15.3	MIMAT0000242	hsa-miR-129-5p	ENSG00000105576	TNPO2
ENSG00000272831.1	RP11-792A8.4	MIMAT0000242	hsa-miR-129-5p	ENSG00000254087	LYN
ENSG00000272205.1	RP11-277B15.3	MIMAT0000242	hsa-miR-129-5p	ENSG00000113448	PDE4D
ENSG00000272473.1	AC006273.4	MIMAT0000242	hsa-miR-129-5p	ENSG00000012048	BRCA1
ENSG00000272205.1	RP11-277B15.3	MIMAT0000242	hsa-miR-129-5p	ENSG00000110917	MLEC
ENSG00000272831.1	RP11-792A8.4	MIMAT0000242	hsa-miR-129-5p	ENSG00000100906	NFKBIA
ENSG00000272831.1	RP11-792A8.4	MIMAT0000242	hsa-miR-129-5p	ENSG00000104783	KCNN4
ENSG00000260711.2	RP11-747H7.3	MIMAT0000242	hsa-miR-129-5p	ENSG00000254087	LYN
ENSG00000224899.1	RP11-3B12.5	MIMAT0000242	hsa-miR-129-5p	ENSG00000163820	FYCO1
ENSG00000224899.1	RP11-3B12.5	MIMAT0000242	hsa-miR-129-5p	ENSG00000024526	DEPDC1
ENSG00000272831.1	RP11-792A8.4	MIMAT0000242	hsa-miR-129-5p	ENSG00000146648	EGFR
ENSG00000272831.1	RP11-792A8.4	MIMAT0000242	hsa-miR-129-5p	ENSG00000158769	F11R
ENSG00000272205.1	RP11-277B15.3	MIMAT0000242	hsa-miR-129-5p	ENSG00000115415	STAT1
ENSG00000260711.2	RP11-747H7.3	MIMAT0000242	hsa-miR-129-5p	ENSG00000169429	CXCL8
ENSG00000272205.1	RP11-277B15.3	MIMAT0000242	hsa-miR-129-5p	ENSG00000100906	NFKBIA
ENSG00000272205.1	RP11-277B15.3	MIMAT0000242	hsa-miR-129-5p	ENSG00000186187	ZNRF1
ENSG00000272831.1	RP11-792A8.4	MIMAT0000242	hsa-miR-129-5p	ENSG00000152217	SETBP1
ENSG00000175772.10	LINC01106	MIMAT0000242	hsa-miR-129-5p	ENSG00000105576	TNPO2
ENSG00000182912.6	TSPEAR-AS2	MIMAT0000242	hsa-miR-129-5p	ENSG00000104738	MCM4
ENSG00000224899.1	RP11-3B12.5	MIMAT0000242	hsa-miR-129-5p	ENSG00000121152	NCAPH
ENSG00000224899.1	RP11-3B12.5	MIMAT0000242	hsa-miR-129-5p	ENSG00000134874	DZIP1
ENSG00000175772.10	LINC01106	MIMAT0000242	hsa-miR-129-5p	ENSG00000163808	KIF15
ENSG00000273004.1	GS1-279B7.2	MIMAT0000242	hsa-miR-129-5p	ENSG00000169429	CXCL8
ENSG00000260711.2	RP11-747H7.3	MIMAT0000242	hsa-miR-129-5p	ENSG00000104738	MCM4
ENSG00000272205.1	RP11-277B15.3	MIMAT0000242	hsa-miR-129-5p	ENSG00000176208	ATAD5
ENSG00000272205.1	RP11-277B15.3	MIMAT0000242	hsa-miR-129-5p	ENSG00000145244	CORIN
ENSG00000272205.1	RP11-277B15.3	MIMAT0000242	hsa-miR-129-5p	ENSG00000109586	GALNT7
ENSG00000272831.1	RP11-792A8.4	MIMAT0000242	hsa-miR-129-5p	ENSG00000154920	EME1
ENSG00000275560.1	RP11-180M15.7	MIMAT0000242	hsa-miR-129-5p	ENSG00000160199	PKNOX1
ENSG00000182912.6	TSPEAR-AS2	MIMAT0000242	hsa-miR-129-5p	ENSG00000119969	HELLS
ENSG00000260711.2	RP11-747H7.3	MIMAT0000242	hsa-miR-129-5p	ENSG00000143924	EML4
ENSG00000260711.2	RP11-747H7.3	MIMAT0000242	hsa-miR-129-5p	ENSG00000154920	EME1
ENSG00000272831.1	RP11-792A8.4	MIMAT0000242	hsa-miR-129-5p	ENSG00000024526	DEPDC1
ENSG00000273004.1	GS1-279B7.2	MIMAT0000242	hsa-miR-129-5p	ENSG00000152601	MBNL1
ENSG00000272473.1	AC006273.4	MIMAT0000242	hsa-miR-129-5p	ENSG00000156802	ATAD2
ENSG00000275560.1	RP11-180M15.7	MIMAT0000242	hsa-miR-129-5p	ENSG00000121152	NCAPH
ENSG00000175772.10	LINC01106	MIMAT0000242	hsa-miR-129-5p	ENSG00000113448	PDE4D
ENSG00000272205.1	RP11-277B15.3	MIMAT0000242	hsa-miR-129-5p	ENSG00000119969	HELLS
ENSG00000224899.1	RP11-3B12.5	MIMAT0000242	hsa-miR-129-5p	ENSG00000163808	KIF15
ENSG00000272205.1	RP11-277B15.3	MIMAT0000242	hsa-miR-129-5p	ENSG00000121152	NCAPH
ENSG00000260711.2	RP11-747H7.3	MIMAT0000242	hsa-miR-129-5p	ENSG00000105576	TNPO2
ENSG00000272831.1	RP11-792A8.4	MIMAT0000242	hsa-miR-129-5p	ENSG00000135365	PHF21A
ENSG00000260711.2	RP11-747H7.3	MIMAT0000242	hsa-miR-129-5p	ENSG00000176208	ATAD5
ENSG00000272473.1	AC006273.4	MIMAT0000242	hsa-miR-129-5p	ENSG00000105576	TNPO2
ENSG00000182912.6	TSPEAR-AS2	MIMAT0000242	hsa-miR-129-5p	ENSG00000156802	ATAD2
ENSG00000175772.10	LINC01106	MIMAT0000242	hsa-miR-129-5p	ENSG00000132530	XAF1
ENSG00000175772.10	LINC01106	MIMAT0000242	hsa-miR-129-5p	ENSG00000115415	STAT1
ENSG00000182912.6	TSPEAR-AS2	MIMAT0000242	hsa-miR-129-5p	ENSG00000121152	NCAPH
ENSG00000224899.1	RP11-3B12.5	MIMAT0000242	hsa-miR-129-5p	ENSG00000143924	EML4
ENSG00000224899.1	RP11-3B12.5	MIMAT0000242	hsa-miR-129-5p	ENSG00000100906	NFKBIA
ENSG00000272473.1	AC006273.4	MIMAT0000242	hsa-miR-129-5p	ENSG00000154920	EME1
ENSG00000224899.1	RP11-3B12.5	MIMAT0000242	hsa-miR-129-5p	ENSG00000158769	F11R
ENSG00000272205.1	RP11-277B15.3	MIMAT0000242	hsa-miR-129-5p	ENSG00000104783	KCNN4
ENSG00000272205.1	RP11-277B15.3	MIMAT0000242	hsa-miR-129-5p	ENSG00000154096	THY1
ENSG00000275560.1	RP11-180M15.7	MIMAT0000242	hsa-miR-129-5p	ENSG00000154920	EME1
ENSG00000272831.1	RP11-792A8.4	MIMAT0000242	hsa-miR-129-5p	ENSG00000132530	XAF1
ENSG00000260711.2	RP11-747H7.3	MIMAT0000242	hsa-miR-129-5p	ENSG00000136040	PLXNC1
ENSG00000272473.1	AC006273.4	MIMAT0000242	hsa-miR-129-5p	ENSG00000154096	THY1
ENSG00000260711.2	RP11-747H7.3	MIMAT0000242	hsa-miR-129-5p	ENSG00000115415	STAT1
ENSG00000275560.1	RP11-180M15.7	MIMAT0000242	hsa-miR-129-5p	ENSG00000169429	CXCL8
ENSG00000260711.2	RP11-747H7.3	MIMAT0000242	hsa-miR-129-5p	ENSG00000154096	THY1
ENSG00000224899.1	RP11-3B12.5	MIMAT0000242	hsa-miR-129-5p	ENSG00000105976	MET
ENSG00000175772.10	LINC01106	MIMAT0000242	hsa-miR-129-5p	ENSG00000156802	ATAD2
ENSG00000260711.2	RP11-747H7.3	MIMAT0000242	hsa-miR-129-5p	ENSG00000119004	CYP20A1
ENSG00000260711.2	RP11-747H7.3	MIMAT0000242	hsa-miR-129-5p	ENSG00000134874	DZIP1
ENSG00000275560.1	RP11-180M15.7	MIMAT0000242	hsa-miR-129-5p	ENSG00000110917	MLEC
ENSG00000272205.1	RP11-277B15.3	MIMAT0000242	hsa-miR-129-5p	ENSG00000163820	FYCO1
ENSG00000272205.1	RP11-277B15.3	MIMAT0000242	hsa-miR-129-5p	ENSG00000169429	CXCL8
ENSG00000275560.1	RP11-180M15.7	MIMAT0000242	hsa-miR-129-5p	ENSG00000176208	ATAD5
ENSG00000272473.1	AC006273.4	MIMAT0000242	hsa-miR-129-5p	ENSG00000024526	DEPDC1
ENSG00000260711.2	RP11-747H7.3	MIMAT0000242	hsa-miR-129-5p	ENSG00000104783	KCNN4
ENSG00000272473.1	AC006273.4	MIMAT0000242	hsa-miR-129-5p	ENSG00000104783	KCNN4
ENSG00000175772.10	LINC01106	MIMAT0000242	hsa-miR-129-5p	ENSG00000176208	ATAD5
ENSG00000224899.1	RP11-3B12.5	MIMAT0000242	hsa-miR-129-5p	ENSG00000104738	MCM4
ENSG00000273004.1	GS1-279B7.2	MIMAT0000242	hsa-miR-129-5p	ENSG00000012048	BRCA1
ENSG00000273004.1	GS1-279B7.2	MIMAT0000242	hsa-miR-129-5p	ENSG00000254087	LYN
ENSG00000272473.1	AC006273.4	MIMAT0000242	hsa-miR-129-5p	ENSG00000135365	PHF21A
ENSG00000175772.10	LINC01106	MIMAT0000242	hsa-miR-129-5p	ENSG00000119969	HELLS
ENSG00000275560.1	RP11-180M15.7	MIMAT0000242	hsa-miR-129-5p	ENSG00000143924	EML4
ENSG00000272205.1	RP11-277B15.3	MIMAT0000242	hsa-miR-129-5p	ENSG00000152601	MBNL1
ENSG00000273004.1	GS1-279B7.2	MIMAT0000242	hsa-miR-129-5p	ENSG00000105576	TNPO2
ENSG00000273004.1	GS1-279B7.2	MIMAT0000242	hsa-miR-129-5p	ENSG00000160199	PKNOX1
ENSG00000224899.1	RP11-3B12.5	MIMAT0000242	hsa-miR-129-5p	ENSG00000119004	CYP20A1
ENSG00000272473.1	AC006273.4	MIMAT0000242	hsa-miR-129-5p	ENSG00000119004	CYP20A1
ENSG00000275560.1	RP11-180M15.7	MIMAT0000242	hsa-miR-129-5p	ENSG00000158769	F11R
ENSG00000224899.1	RP11-3B12.5	MIMAT0000242	hsa-miR-129-5p	ENSG00000105576	TNPO2
ENSG00000182912.6	TSPEAR-AS2	MIMAT0000242	hsa-miR-129-5p	ENSG00000169429	CXCL8
ENSG00000260711.2	RP11-747H7.3	MIMAT0000242	hsa-miR-129-5p	ENSG00000105976	MET
ENSG00000224899.1	RP11-3B12.5	MIMAT0000242	hsa-miR-129-5p	ENSG00000156802	ATAD2
ENSG00000260711.2	RP11-747H7.3	MIMAT0000242	hsa-miR-129-5p	ENSG00000152217	SETBP1
ENSG00000175772.10	LINC01106	MIMAT0000242	hsa-miR-129-5p	ENSG00000134874	DZIP1
ENSG00000272831.1	RP11-792A8.4	MIMAT0000242	hsa-miR-129-5p	ENSG00000169429	CXCL8
ENSG00000260711.2	RP11-747H7.3	MIMAT0000242	hsa-miR-129-5p	ENSG00000152601	MBNL1
ENSG00000273004.1	GS1-279B7.2	MIMAT0000242	hsa-miR-129-5p	ENSG00000145244	CORIN
ENSG00000275560.1	RP11-180M15.7	MIMAT0000242	hsa-miR-129-5p	ENSG00000132530	XAF1
ENSG00000272473.1	AC006273.4	MIMAT0000242	hsa-miR-129-5p	ENSG00000163808	KIF15
ENSG00000273004.1	GS1-279B7.2	MIMAT0000242	hsa-miR-129-5p	ENSG00000134874	DZIP1
ENSG00000260711.2	RP11-747H7.3	MIMAT0000242	hsa-miR-129-5p	ENSG00000110917	MLEC
ENSG00000182912.6	TSPEAR-AS2	MIMAT0000242	hsa-miR-129-5p	ENSG00000143924	EML4
ENSG00000182912.6	TSPEAR-AS2	MIMAT0000242	hsa-miR-129-5p	ENSG00000134874	DZIP1
ENSG00000224899.1	RP11-3B12.5	MIMAT0000242	hsa-miR-129-5p	ENSG00000145244	CORIN
ENSG00000224899.1	RP11-3B12.5	MIMAT0000242	hsa-miR-129-5p	ENSG00000146648	EGFR
ENSG00000182912.6	TSPEAR-AS2	MIMAT0000242	hsa-miR-129-5p	ENSG00000109586	GALNT7
ENSG00000182912.6	TSPEAR-AS2	MIMAT0000242	hsa-miR-129-5p	ENSG00000186187	ZNRF1
ENSG00000272473.1	AC006273.4	MIMAT0000242	hsa-miR-129-5p	ENSG00000254087	LYN
ENSG00000272831.1	RP11-792A8.4	MIMAT0000242	hsa-miR-129-5p	ENSG00000160199	PKNOX1
ENSG00000260711.2	RP11-747H7.3	MIMAT0000242	hsa-miR-129-5p	ENSG00000160199	PKNOX1
ENSG00000260711.2	RP11-747H7.3	MIMAT0000242	hsa-miR-129-5p	ENSG00000109586	GALNT7
ENSG00000272473.1	AC006273.4	MIMAT0000242	hsa-miR-129-5p	ENSG00000100906	NFKBIA
ENSG00000182912.6	TSPEAR-AS2	MIMAT0000242	hsa-miR-129-5p	ENSG00000160199	PKNOX1
ENSG00000182912.6	TSPEAR-AS2	MIMAT0000242	hsa-miR-129-5p	ENSG00000110917	MLEC
ENSG00000182912.6	TSPEAR-AS2	MIMAT0000242	hsa-miR-129-5p	ENSG00000154096	THY1
ENSG00000182912.6	TSPEAR-AS2	MIMAT0000242	hsa-miR-129-5p	ENSG00000152601	MBNL1
ENSG00000182912.6	TSPEAR-AS2	MIMAT0000242	hsa-miR-129-5p	ENSG00000152217	SETBP1
ENSG00000224899.1	RP11-3B12.5	MIMAT0000242	hsa-miR-129-5p	ENSG00000186187	ZNRF1
ENSG00000224899.1	RP11-3B12.5	MIMAT0000242	hsa-miR-129-5p	ENSG00000160199	PKNOX1
ENSG00000273004.1	GS1-279B7.2	MIMAT0000242	hsa-miR-129-5p	ENSG00000158769	F11R
ENSG00000224899.1	RP11-3B12.5	MIMAT0000242	hsa-miR-129-5p	ENSG00000152601	MBNL1
ENSG00000272473.1	AC006273.4	MIMAT0000242	hsa-miR-129-5p	ENSG00000163820	FYCO1
ENSG00000272831.1	RP11-792A8.4	MIMAT0000242	hsa-miR-129-5p	ENSG00000121152	NCAPH
ENSG00000272473.1	AC006273.4	MIMAT0000242	hsa-miR-129-5p	ENSG00000152601	MBNL1
ENSG00000175772.10	LINC01106	MIMAT0000242	hsa-miR-129-5p	ENSG00000146648	EGFR
ENSG00000272831.1	RP11-792A8.4	MIMAT0000242	hsa-miR-129-5p	ENSG00000134874	DZIP1
ENSG00000182912.6	TSPEAR-AS2	MIMAT0000242	hsa-miR-129-5p	ENSG00000024526	DEPDC1
ENSG00000272205.1	RP11-277B15.3	MIMAT0000242	hsa-miR-129-5p	ENSG00000143924	EML4
ENSG00000224899.1	RP11-3B12.5	MIMAT0000242	hsa-miR-129-5p	ENSG00000154096	THY1
ENSG00000182912.6	TSPEAR-AS2	MIMAT0000242	hsa-miR-129-5p	ENSG00000119004	CYP20A1
ENSG00000182912.6	TSPEAR-AS2	MIMAT0000242	hsa-miR-129-5p	ENSG00000104783	KCNN4
ENSG00000273004.1	GS1-279B7.2	MIMAT0000242	hsa-miR-129-5p	ENSG00000186187	ZNRF1
ENSG00000224899.1	RP11-3B12.5	MIMAT0000242	hsa-miR-129-5p	ENSG00000132530	XAF1
ENSG00000273004.1	GS1-279B7.2	MIMAT0000242	hsa-miR-129-5p	ENSG00000163820	FYCO1
ENSG00000272473.1	AC006273.4	MIMAT0000242	hsa-miR-129-5p	ENSG00000115415	STAT1
ENSG00000260711.2	RP11-747H7.3	MIMAT0000242	hsa-miR-129-5p	ENSG00000135365	PHF21A
ENSG00000272473.1	AC006273.4	MIMAT0000242	hsa-miR-129-5p	ENSG00000105976	MET
ENSG00000272473.1	AC006273.4	MIMAT0000242	hsa-miR-129-5p	ENSG00000104738	MCM4
ENSG00000273004.1	GS1-279B7.2	MIMAT0000242	hsa-miR-129-5p	ENSG00000163808	KIF15
ENSG00000272205.1	RP11-277B15.3	MIMAT0000242	hsa-miR-129-5p	ENSG00000254087	LYN
ENSG00000272831.1	RP11-792A8.4	MIMAT0000242	hsa-miR-129-5p	ENSG00000186187	ZNRF1
ENSG00000273004.1	GS1-279B7.2	MIMAT0000242	hsa-miR-129-5p	ENSG00000024526	DEPDC1
ENSG00000182912.6	TSPEAR-AS2	MIMAT0000242	hsa-miR-129-5p	ENSG00000135365	PHF21A
ENSG00000182912.6	TSPEAR-AS2	MIMAT0000242	hsa-miR-129-5p	ENSG00000132530	XAF1
ENSG00000273004.1	GS1-279B7.2	MIMAT0000242	hsa-miR-129-5p	ENSG00000100906	NFKBIA
ENSG00000273004.1	GS1-279B7.2	MIMAT0000242	hsa-miR-129-5p	ENSG00000104783	KCNN4
ENSG00000272205.1	RP11-277B15.3	MIMAT0000242	hsa-miR-129-5p	ENSG00000136040	PLXNC1
ENSG00000182912.6	TSPEAR-AS2	MIMAT0000242	hsa-miR-129-5p	ENSG00000163820	FYCO1
ENSG00000273004.1	GS1-279B7.2	MIMAT0000242	hsa-miR-129-5p	ENSG00000143924	EML4
ENSG00000175772.10	LINC01106	MIMAT0000242	hsa-miR-129-5p	ENSG00000154096	THY1
ENSG00000182912.6	TSPEAR-AS2	MIMAT0000242	hsa-miR-129-5p	ENSG00000254087	LYN
ENSG00000175772.10	LINC01106	MIMAT0000242	hsa-miR-129-5p	ENSG00000145244	CORIN
ENSG00000272473.1	AC006273.4	MIMAT0000242	hsa-miR-129-5p	ENSG00000132530	XAF1
ENSG00000175772.10	LINC01106	MIMAT0000242	hsa-miR-129-5p	ENSG00000104738	MCM4
ENSG00000260711.2	RP11-747H7.3	MIMAT0000242	hsa-miR-129-5p	ENSG00000158769	F11R
ENSG00000275560.1	RP11-180M15.7	MIMAT0000242	hsa-miR-129-5p	ENSG00000135365	PHF21A
ENSG00000182912.6	TSPEAR-AS2	MIMAT0000242	hsa-miR-129-5p	ENSG00000176208	ATAD5
ENSG00000275560.1	RP11-180M15.7	MIMAT0000242	hsa-miR-129-5p	ENSG00000186187	ZNRF1
ENSG00000273004.1	GS1-279B7.2	MIMAT0000242	hsa-miR-129-5p	ENSG00000119969	HELLS
ENSG00000260711.2	RP11-747H7.3	MIMAT0000242	hsa-miR-129-5p	ENSG00000121152	NCAPH
ENSG00000272473.1	AC006273.4	MIMAT0000242	hsa-miR-129-5p	ENSG00000146648	EGFR
ENSG00000272205.1	RP11-277B15.3	MIMAT0000242	hsa-miR-129-5p	ENSG00000160199	PKNOX1
ENSG00000273004.1	GS1-279B7.2	MIMAT0000242	hsa-miR-129-5p	ENSG00000146648	EGFR
ENSG00000272473.1	AC006273.4	MIMAT0000242	hsa-miR-129-5p	ENSG00000160199	PKNOX1
ENSG00000272205.1	RP11-277B15.3	MIMAT0000242	hsa-miR-129-5p	ENSG00000135365	PHF21A
ENSG00000224899.1	RP11-3B12.5	MIMAT0000242	hsa-miR-129-5p	ENSG00000169429	CXCL8
ENSG00000182912.6	TSPEAR-AS2	MIMAT0000242	hsa-miR-129-5p	ENSG00000115415	STAT1
ENSG00000224899.1	RP11-3B12.5	MIMAT0000242	hsa-miR-129-5p	ENSG00000154920	EME1
ENSG00000175772.10	LINC01106	MIMAT0000242	hsa-miR-129-5p	ENSG00000154920	EME1
ENSG00000182912.6	TSPEAR-AS2	MIMAT0000242	hsa-miR-129-5p	ENSG00000012048	BRCA1
ENSG00000273004.1	GS1-279B7.2	MIMAT0000242	hsa-miR-129-5p	ENSG00000115415	STAT1
ENSG00000224899.1	RP11-3B12.5	MIMAT0000242	hsa-miR-129-5p	ENSG00000115415	STAT1
ENSG00000260711.2	RP11-747H7.3	MIMAT0000242	hsa-miR-129-5p	ENSG00000156802	ATAD2
ENSG00000224899.1	RP11-3B12.5	MIMAT0000242	hsa-miR-129-5p	ENSG00000152217	SETBP1
ENSG00000260711.2	RP11-747H7.3	MIMAT0000242	hsa-miR-129-5p	ENSG00000163820	FYCO1
ENSG00000273004.1	GS1-279B7.2	MIMAT0000242	hsa-miR-129-5p	ENSG00000105976	MET
ENSG00000224899.1	RP11-3B12.5	MIMAT0000242	hsa-miR-129-5p	ENSG00000135365	PHF21A
ENSG00000272831.1	RP11-792A8.4	MIMAT0000242	hsa-miR-129-5p	ENSG00000115415	STAT1
ENSG00000224899.1	RP11-3B12.5	MIMAT0000242	hsa-miR-129-5p	ENSG00000104783	KCNN4
ENSG00000182912.6	TSPEAR-AS2	MIMAT0000242	hsa-miR-129-5p	ENSG00000146648	EGFR
ENSG00000224899.1	RP11-3B12.5	MIMAT0000242	hsa-miR-129-5p	ENSG00000176208	ATAD5
ENSG00000224899.1	RP11-3B12.5	MIMAT0000242	hsa-miR-129-5p	ENSG00000012048	BRCA1
ENSG00000273004.1	GS1-279B7.2	MIMAT0000242	hsa-miR-129-5p	ENSG00000119004	CYP20A1
ENSG00000182912.6	TSPEAR-AS2	MIMAT0000242	hsa-miR-129-5p	ENSG00000145244	CORIN
ENSG00000272473.1	AC006273.4	MIMAT0000242	hsa-miR-129-5p	ENSG00000152217	SETBP1
ENSG00000272473.1	AC006273.4	MIMAT0000242	hsa-miR-129-5p	ENSG00000169429	CXCL8
ENSG00000175772.10	LINC01106	MIMAT0000242	hsa-miR-129-5p	ENSG00000143924	EML4
ENSG00000272473.1	AC006273.4	MIMAT0000242	hsa-miR-129-5p	ENSG00000110917	MLEC
ENSG00000182912.6	TSPEAR-AS2	MIMAT0000242	hsa-miR-129-5p	ENSG00000136040	PLXNC1
ENSG00000224899.1	RP11-3B12.5	MIMAT0000242	hsa-miR-129-5p	ENSG00000136040	PLXNC1
ENSG00000175772.10	LINC01106	MIMAT0000242	hsa-miR-129-5p	ENSG00000012048	BRCA1
ENSG00000273004.1	GS1-279B7.2	MIMAT0000242	hsa-miR-129-5p	ENSG00000154096	THY1
ENSG00000260711.2	RP11-747H7.3	MIMAT0000242	hsa-miR-129-5p	ENSG00000113448	PDE4D
ENSG00000272205.1	RP11-277B15.3	MIMAT0000242	hsa-miR-129-5p	ENSG00000134874	DZIP1
ENSG00000273004.1	GS1-279B7.2	MIMAT0000242	hsa-miR-129-5p	ENSG00000132530	XAF1
ENSG00000272473.1	AC006273.4	MIMAT0000242	hsa-miR-129-5p	ENSG00000121152	NCAPH
ENSG00000260711.2	RP11-747H7.3	MIMAT0000242	hsa-miR-129-5p	ENSG00000100906	NFKBIA
ENSG00000275560.1	RP11-180M15.7	MIMAT0000242	hsa-miR-129-5p	ENSG00000113448	PDE4D
ENSG00000182912.6	TSPEAR-AS2	MIMAT0000242	hsa-miR-129-5p	ENSG00000105576	TNPO2
ENSG00000272831.1	RP11-792A8.4	MIMAT0000242	hsa-miR-129-5p	ENSG00000119004	CYP20A1
ENSG00000273004.1	GS1-279B7.2	MIMAT0000242	hsa-miR-129-5p	ENSG00000110917	MLEC
ENSG00000273004.1	GS1-279B7.2	MIMAT0000242	hsa-miR-129-5p	ENSG00000152217	SETBP1
ENSG00000272473.1	AC006273.4	MIMAT0000242	hsa-miR-129-5p	ENSG00000143924	EML4
ENSG00000273004.1	GS1-279B7.2	MIMAT0000242	hsa-miR-129-5p	ENSG00000121152	NCAPH
ENSG00000260711.2	RP11-747H7.3	MIMAT0000242	hsa-miR-129-5p	ENSG00000163808	KIF15
ENSG00000260711.2	RP11-747H7.3	MIMAT0000242	hsa-miR-129-5p	ENSG00000132530	XAF1
ENSG00000175772.10	LINC01106	MIMAT0000242	hsa-miR-129-5p	ENSG00000100906	NFKBIA
ENSG00000273004.1	GS1-279B7.2	MIMAT0000242	hsa-miR-129-5p	ENSG00000135365	PHF21A
ENSG00000275560.1	RP11-180M15.7	MIMAT0000242	hsa-miR-129-5p	ENSG00000115415	STAT1
ENSG00000175772.10	LINC01106	MIMAT0000242	hsa-miR-129-5p	ENSG00000158769	F11R
ENSG00000224899.1	RP11-3B12.5	MIMAT0000242	hsa-miR-129-5p	ENSG00000113448	PDE4D
ENSG00000182912.6	TSPEAR-AS2	MIMAT0000242	hsa-miR-129-5p	ENSG00000100906	NFKBIA
ENSG00000273004.1	GS1-279B7.2	MIMAT0000242	hsa-miR-129-5p	ENSG00000109586	GALNT7
ENSG00000175772.10	LINC01106	MIMAT0000242	hsa-miR-129-5p	ENSG00000163820	FYCO1
ENSG00000175772.10	LINC01106	MIMAT0000242	hsa-miR-129-5p	ENSG00000135365	PHF21A
ENSG00000272473.1	AC006273.4	MIMAT0000242	hsa-miR-129-5p	ENSG00000134874	DZIP1
ENSG00000275560.1	RP11-180M15.7	MIMAT0000242	hsa-miR-129-5p	ENSG00000136040	PLXNC1
ENSG00000275560.1	RP11-180M15.7	MIMAT0000242	hsa-miR-129-5p	ENSG00000109586	GALNT7
ENSG00000273004.1	GS1-279B7.2	MIMAT0000242	hsa-miR-129-5p	ENSG00000154920	EME1
ENSG00000273004.1	GS1-279B7.2	MIMAT0000242	hsa-miR-129-5p	ENSG00000113448	PDE4D
ENSG00000273004.1	GS1-279B7.2	MIMAT0000242	hsa-miR-129-5p	ENSG00000176208	ATAD5
ENSG00000260711.2	RP11-747H7.3	MIMAT0000242	hsa-miR-129-5p	ENSG00000119969	HELLS
ENSG00000275560.1	RP11-180M15.7	MIMAT0000242	hsa-miR-129-5p	ENSG00000146648	EGFR
ENSG00000273004.1	GS1-279B7.2	MIMAT0000242	hsa-miR-129-5p	ENSG00000104738	MCM4
ENSG00000272831.1	RP11-792A8.4	MIMAT0000242	hsa-miR-129-5p	ENSG00000152601	MBNL1
ENSG00000175772.10	LINC01106	MIMAT0000242	hsa-miR-129-5p	ENSG00000109586	GALNT7
ENSG00000182912.6	TSPEAR-AS2	MIMAT0000242	hsa-miR-129-5p	ENSG00000105976	MET
ENSG00000275560.1	RP11-180M15.7	MIMAT0000242	hsa-miR-129-5p	ENSG00000145244	CORIN
ENSG00000182912.6	TSPEAR-AS2	MIMAT0000242	hsa-miR-129-5p	ENSG00000154920	EME1
ENSG00000260711.2	RP11-747H7.3	MIMAT0000242	hsa-miR-129-5p	ENSG00000012048	BRCA1
ENSG00000175772.10	LINC01106	MIMAT0000242	hsa-miR-129-5p	ENSG00000110917	MLEC
ENSG00000224899.1	RP11-3B12.5	MIMAT0000242	hsa-miR-129-5p	ENSG00000254087	LYN
ENSG00000273004.1	GS1-279B7.2	MIMAT0000242	hsa-miR-129-5p	ENSG00000156802	ATAD2
ENSG00000175772.10	LINC01106	MIMAT0000242	hsa-miR-129-5p	ENSG00000121152	NCAPH
ENSG00000275560.1	RP11-180M15.7	MIMAT0000242	hsa-miR-129-5p	ENSG00000024526	DEPDC1
ENSG00000272473.1	AC006273.4	MIMAT0000242	hsa-miR-129-5p	ENSG00000158769	F11R
ENSG00000260711.2	RP11-747H7.3	MIMAT0000242	hsa-miR-129-5p	ENSG00000186187	ZNRF1
ENSG00000260711.2	RP11-747H7.3	MIMAT0000242	hsa-miR-129-5p	ENSG00000146648	EGFR
ENSG00000275560.1	RP11-180M15.7	MIMAT0000242	hsa-miR-129-5p	ENSG00000152217	SETBP1
ENSG00000275560.1	RP11-180M15.7	MIMAT0000242	hsa-miR-129-5p	ENSG00000152601	MBNL1
ENSG00000273004.1	GS1-279B7.2	MIMAT0000242	hsa-miR-129-5p	ENSG00000136040	PLXNC1
ENSG00000224899.1	RP11-3B12.5	MIMAT0000242	hsa-miR-129-5p	ENSG00000109586	GALNT7
ENSG00000272473.1	AC006273.4	MIMAT0000242	hsa-miR-129-5p	ENSG00000186187	ZNRF1
ENSG00000248668.2	OXCT1-AS1	MIMAT0000427	hsa-miR-133a-3p	ENSG00000156802	ATAD2
ENSG00000248668.2	OXCT1-AS1	MIMAT0000427	hsa-miR-133a-3p	ENSG00000146648	EGFR
ENSG00000248668.2	OXCT1-AS1	MIMAT0000427	hsa-miR-133a-3p	ENSG00000136040	PLXNC1
ENSG00000237513.1	RP11-325F22.2	MIMAT0000427	hsa-miR-133a-3p	ENSG00000153214	TMEM87B
ENSG00000248668.2	OXCT1-AS1	MIMAT0000427	hsa-miR-133a-3p	ENSG00000105976	MET
ENSG00000248668.2	OXCT1-AS1	MIMAT0000427	hsa-miR-133a-3p	ENSG00000118513	MYB
ENSG00000237513.1	RP11-325F22.2	MIMAT0000427	hsa-miR-133a-3p	ENSG00000006062	MAP3K14
ENSG00000237513.1	RP11-325F22.2	MIMAT0000427	hsa-miR-133a-3p	ENSG00000118513	MYB
ENSG00000237513.1	RP11-325F22.2	MIMAT0000427	hsa-miR-133a-3p	ENSG00000163808	KIF15
ENSG00000237513.1	RP11-325F22.2	MIMAT0000427	hsa-miR-133a-3p	ENSG00000146648	EGFR
ENSG00000248668.2	OXCT1-AS1	MIMAT0000427	hsa-miR-133a-3p	ENSG00000163808	KIF15
ENSG00000237513.1	RP11-325F22.2	MIMAT0000427	hsa-miR-133a-3p	ENSG00000135720	DYNC1LI2
ENSG00000272686.1	RP11-390E23.6	MIMAT0000427	hsa-miR-133a-3p	ENSG00000177606	JUN
ENSG00000272686.1	RP11-390E23.6	MIMAT0000427	hsa-miR-133a-3p	ENSG00000152601	MBNL1
ENSG00000248668.2	OXCT1-AS1	MIMAT0000427	hsa-miR-133a-3p	ENSG00000177606	JUN
ENSG00000272686.1	RP11-390E23.6	MIMAT0000427	hsa-miR-133a-3p	ENSG00000156802	ATAD2
ENSG00000237513.1	RP11-325F22.2	MIMAT0000427	hsa-miR-133a-3p	ENSG00000177606	JUN
ENSG00000272686.1	RP11-390E23.6	MIMAT0000427	hsa-miR-133a-3p	ENSG00000146648	EGFR
ENSG00000237513.1	RP11-325F22.2	MIMAT0000427	hsa-miR-133a-3p	ENSG00000123329	ARHGAP9
ENSG00000237513.1	RP11-325F22.2	MIMAT0000427	hsa-miR-133a-3p	ENSG00000119969	HELLS
ENSG00000237513.1	RP11-325F22.2	MIMAT0000427	hsa-miR-133a-3p	ENSG00000136040	PLXNC1
ENSG00000272686.1	RP11-390E23.6	MIMAT0000427	hsa-miR-133a-3p	ENSG00000135720	DYNC1LI2
ENSG00000272686.1	RP11-390E23.6	MIMAT0000427	hsa-miR-133a-3p	ENSG00000136040	PLXNC1
ENSG00000237513.1	RP11-325F22.2	MIMAT0000427	hsa-miR-133a-3p	ENSG00000152601	MBNL1
ENSG00000248668.2	OXCT1-AS1	MIMAT0000427	hsa-miR-133a-3p	ENSG00000006062	MAP3K14
ENSG00000272686.1	RP11-390E23.6	MIMAT0000427	hsa-miR-133a-3p	ENSG00000105976	MET
ENSG00000248668.2	OXCT1-AS1	MIMAT0000427	hsa-miR-133a-3p	ENSG00000135720	DYNC1LI2
ENSG00000272686.1	RP11-390E23.6	MIMAT0000427	hsa-miR-133a-3p	ENSG00000123329	ARHGAP9
ENSG00000272686.1	RP11-390E23.6	MIMAT0000427	hsa-miR-133a-3p	ENSG00000163808	KIF15
ENSG00000237513.1	RP11-325F22.2	MIMAT0000427	hsa-miR-133a-3p	ENSG00000107779	BMPR1A
ENSG00000248668.2	OXCT1-AS1	MIMAT0000427	hsa-miR-133a-3p	ENSG00000153214	TMEM87B
ENSG00000272686.1	RP11-390E23.6	MIMAT0000427	hsa-miR-133a-3p	ENSG00000118513	MYB
ENSG00000272686.1	RP11-390E23.6	MIMAT0000427	hsa-miR-133a-3p	ENSG00000153214	TMEM87B
ENSG00000248668.2	OXCT1-AS1	MIMAT0000427	hsa-miR-133a-3p	ENSG00000119969	HELLS
ENSG00000237513.1	RP11-325F22.2	MIMAT0000427	hsa-miR-133a-3p	ENSG00000105976	MET
ENSG00000248668.2	OXCT1-AS1	MIMAT0000427	hsa-miR-133a-3p	ENSG00000152601	MBNL1
ENSG00000248668.2	OXCT1-AS1	MIMAT0000427	hsa-miR-133a-3p	ENSG00000107779	BMPR1A
ENSG00000272686.1	RP11-390E23.6	MIMAT0000427	hsa-miR-133a-3p	ENSG00000119969	HELLS
ENSG00000272686.1	RP11-390E23.6	MIMAT0000427	hsa-miR-133a-3p	ENSG00000107779	BMPR1A
ENSG00000237513.1	RP11-325F22.2	MIMAT0000427	hsa-miR-133a-3p	ENSG00000156802	ATAD2
ENSG00000272686.1	RP11-390E23.6	MIMAT0000427	hsa-miR-133a-3p	ENSG00000006062	MAP3K14
ENSG00000248668.2	OXCT1-AS1	MIMAT0000427	hsa-miR-133a-3p	ENSG00000123329	ARHGAP9
ENSG00000236283.2	AC013463.2	MIMAT0000250	hsa-miR-139-5p	ENSG00000186517	ARHGAP30
ENSG00000225975.5	LINC01534	MIMAT0000250	hsa-miR-139-5p	ENSG00000152601	MBNL1
ENSG00000225975.5	LINC01534	MIMAT0000250	hsa-miR-139-5p	ENSG00000177606	JUN
ENSG00000225975.5	LINC01534	MIMAT0000250	hsa-miR-139-5p	ENSG00000011426	ANLN
ENSG00000274979.1	RP11-1143G9.5	MIMAT0000250	hsa-miR-139-5p	ENSG00000171320	ESCO2
ENSG00000215417.9	MIR17HG	MIMAT0000250	hsa-miR-139-5p	ENSG00000113448	PDE4D
ENSG00000173811.9	CCDC13-AS1	MIMAT0000250	hsa-miR-139-5p	ENSG00000105976	MET
ENSG00000236283.2	AC013463.2	MIMAT0000250	hsa-miR-139-5p	ENSG00000163808	KIF15
ENSG00000173811.9	CCDC13-AS1	MIMAT0000250	hsa-miR-139-5p	ENSG00000153214	TMEM87B
ENSG00000274979.1	RP11-1143G9.5	MIMAT0000250	hsa-miR-139-5p	ENSG00000113448	PDE4D
ENSG00000225975.5	LINC01534	MIMAT0000250	hsa-miR-139-5p	ENSG00000171848	RRM2
ENSG00000225975.5	LINC01534	MIMAT0000250	hsa-miR-139-5p	ENSG00000005249	PRKAR2B
ENSG00000274979.1	RP11-1143G9.5	MIMAT0000250	hsa-miR-139-5p	ENSG00000011426	ANLN
ENSG00000234883.3	MIR155HG	MIMAT0000250	hsa-miR-139-5p	ENSG00000135720	DYNC1LI2
ENSG00000234883.3	MIR155HG	MIMAT0000250	hsa-miR-139-5p	ENSG00000264364	DYNLL2
ENSG00000225975.5	LINC01534	MIMAT0000250	hsa-miR-139-5p	ENSG00000186517	ARHGAP30
ENSG00000272264.1	RP11-92K15.3	MIMAT0000250	hsa-miR-139-5p	ENSG00000113448	PDE4D
ENSG00000274979.1	RP11-1143G9.5	MIMAT0000250	hsa-miR-139-5p	ENSG00000108306	FBXL20
ENSG00000274979.1	RP11-1143G9.5	MIMAT0000250	hsa-miR-139-5p	ENSG00000264364	DYNLL2
ENSG00000225975.5	LINC01534	MIMAT0000250	hsa-miR-139-5p	ENSG00000140451	PIF1
ENSG00000225975.5	LINC01534	MIMAT0000250	hsa-miR-139-5p	ENSG00000176986	SEC24C
ENSG00000234883.3	MIR155HG	MIMAT0000250	hsa-miR-139-5p	ENSG00000109586	GALNT7
ENSG00000173811.9	CCDC13-AS1	MIMAT0000250	hsa-miR-139-5p	ENSG00000113448	PDE4D
ENSG00000236283.2	AC013463.2	MIMAT0000250	hsa-miR-139-5p	ENSG00000109586	GALNT7
ENSG00000225975.5	LINC01534	MIMAT0000250	hsa-miR-139-5p	ENSG00000006062	MAP3K14
ENSG00000173811.9	CCDC13-AS1	MIMAT0000250	hsa-miR-139-5p	ENSG00000011426	ANLN
ENSG00000225975.5	LINC01534	MIMAT0000250	hsa-miR-139-5p	ENSG00000156802	ATAD2
ENSG00000274979.1	RP11-1143G9.5	MIMAT0000250	hsa-miR-139-5p	ENSG00000105976	MET
ENSG00000272264.1	RP11-92K15.3	MIMAT0000250	hsa-miR-139-5p	ENSG00000051180	RAD51
ENSG00000274979.1	RP11-1143G9.5	MIMAT0000250	hsa-miR-139-5p	ENSG00000105281	SLC1A5
ENSG00000236283.2	AC013463.2	MIMAT0000250	hsa-miR-139-5p	ENSG00000154920	EME1
ENSG00000236283.2	AC013463.2	MIMAT0000250	hsa-miR-139-5p	ENSG00000171848	RRM2
ENSG00000234883.3	MIR155HG	MIMAT0000250	hsa-miR-139-5p	ENSG00000051180	RAD51
ENSG00000215417.9	MIR17HG	MIMAT0000250	hsa-miR-139-5p	ENSG00000152601	MBNL1
ENSG00000215417.9	MIR17HG	MIMAT0000250	hsa-miR-139-5p	ENSG00000005249	PRKAR2B
ENSG00000173811.9	CCDC13-AS1	MIMAT0000250	hsa-miR-139-5p	ENSG00000171848	RRM2
ENSG00000215417.9	MIR17HG	MIMAT0000250	hsa-miR-139-5p	ENSG00000166086	JAM3
ENSG00000234883.3	MIR155HG	MIMAT0000250	hsa-miR-139-5p	ENSG00000158769	F11R
ENSG00000173811.9	CCDC13-AS1	MIMAT0000250	hsa-miR-139-5p	ENSG00000051180	RAD51
ENSG00000234883.3	MIR155HG	MIMAT0000250	hsa-miR-139-5p	ENSG00000108306	FBXL20
ENSG00000225975.5	LINC01534	MIMAT0000250	hsa-miR-139-5p	ENSG00000108306	FBXL20
ENSG00000236283.2	AC013463.2	MIMAT0000250	hsa-miR-139-5p	ENSG00000166086	JAM3
ENSG00000225975.5	LINC01534	MIMAT0000250	hsa-miR-139-5p	ENSG00000171320	ESCO2
ENSG00000234883.3	MIR155HG	MIMAT0000250	hsa-miR-139-5p	ENSG00000110917	MLEC
ENSG00000225975.5	LINC01534	MIMAT0000250	hsa-miR-139-5p	ENSG00000153214	TMEM87B
ENSG00000173811.9	CCDC13-AS1	MIMAT0000250	hsa-miR-139-5p	ENSG00000166086	JAM3
ENSG00000215417.9	MIR17HG	MIMAT0000250	hsa-miR-139-5p	ENSG00000158769	F11R
ENSG00000225975.5	LINC01534	MIMAT0000250	hsa-miR-139-5p	ENSG00000109586	GALNT7
ENSG00000236283.2	AC013463.2	MIMAT0000250	hsa-miR-139-5p	ENSG00000108306	FBXL20
ENSG00000234883.3	MIR155HG	MIMAT0000250	hsa-miR-139-5p	ENSG00000171320	ESCO2
ENSG00000236283.2	AC013463.2	MIMAT0000250	hsa-miR-139-5p	ENSG00000005249	PRKAR2B
ENSG00000272264.1	RP11-92K15.3	MIMAT0000250	hsa-miR-139-5p	ENSG00000264364	DYNLL2
ENSG00000272264.1	RP11-92K15.3	MIMAT0000250	hsa-miR-139-5p	ENSG00000158769	F11R
ENSG00000236283.2	AC013463.2	MIMAT0000250	hsa-miR-139-5p	ENSG00000118513	MYB
ENSG00000234883.3	MIR155HG	MIMAT0000250	hsa-miR-139-5p	ENSG00000166086	JAM3
ENSG00000236283.2	AC013463.2	MIMAT0000250	hsa-miR-139-5p	ENSG00000110917	MLEC
ENSG00000236283.2	AC013463.2	MIMAT0000250	hsa-miR-139-5p	ENSG00000105281	SLC1A5
ENSG00000236283.2	AC013463.2	MIMAT0000250	hsa-miR-139-5p	ENSG00000105976	MET
ENSG00000236283.2	AC013463.2	MIMAT0000250	hsa-miR-139-5p	ENSG00000006062	MAP3K14
ENSG00000234883.3	MIR155HG	MIMAT0000250	hsa-miR-139-5p	ENSG00000105281	SLC1A5
ENSG00000225975.5	LINC01534	MIMAT0000250	hsa-miR-139-5p	ENSG00000051180	RAD51
ENSG00000173811.9	CCDC13-AS1	MIMAT0000250	hsa-miR-139-5p	ENSG00000152601	MBNL1
ENSG00000173811.9	CCDC13-AS1	MIMAT0000250	hsa-miR-139-5p	ENSG00000176986	SEC24C
ENSG00000225975.5	LINC01534	MIMAT0000250	hsa-miR-139-5p	ENSG00000110917	MLEC
ENSG00000225975.5	LINC01534	MIMAT0000250	hsa-miR-139-5p	ENSG00000113448	PDE4D
ENSG00000272264.1	RP11-92K15.3	MIMAT0000250	hsa-miR-139-5p	ENSG00000105281	SLC1A5
ENSG00000225975.5	LINC01534	MIMAT0000250	hsa-miR-139-5p	ENSG00000135720	DYNC1LI2
ENSG00000215417.9	MIR17HG	MIMAT0000250	hsa-miR-139-5p	ENSG00000118513	MYB
ENSG00000236283.2	AC013463.2	MIMAT0000250	hsa-miR-139-5p	ENSG00000171320	ESCO2
ENSG00000215417.9	MIR17HG	MIMAT0000250	hsa-miR-139-5p	ENSG00000186517	ARHGAP30
ENSG00000236283.2	AC013463.2	MIMAT0000250	hsa-miR-139-5p	ENSG00000158769	F11R
ENSG00000215417.9	MIR17HG	MIMAT0000250	hsa-miR-139-5p	ENSG00000105281	SLC1A5
ENSG00000215417.9	MIR17HG	MIMAT0000250	hsa-miR-139-5p	ENSG00000135720	DYNC1LI2
ENSG00000225975.5	LINC01534	MIMAT0000250	hsa-miR-139-5p	ENSG00000105281	SLC1A5
ENSG00000173811.9	CCDC13-AS1	MIMAT0000250	hsa-miR-139-5p	ENSG00000163808	KIF15
ENSG00000215417.9	MIR17HG	MIMAT0000250	hsa-miR-139-5p	ENSG00000108306	FBXL20
ENSG00000173811.9	CCDC13-AS1	MIMAT0000250	hsa-miR-139-5p	ENSG00000110917	MLEC
ENSG00000225975.5	LINC01534	MIMAT0000250	hsa-miR-139-5p	ENSG00000158769	F11R
ENSG00000225975.5	LINC01534	MIMAT0000250	hsa-miR-139-5p	ENSG00000118513	MYB
ENSG00000215417.9	MIR17HG	MIMAT0000250	hsa-miR-139-5p	ENSG00000163808	KIF15
ENSG00000225975.5	LINC01534	MIMAT0000250	hsa-miR-139-5p	ENSG00000163808	KIF15
ENSG00000234883.3	MIR155HG	MIMAT0000250	hsa-miR-139-5p	ENSG00000171848	RRM2
ENSG00000234883.3	MIR155HG	MIMAT0000250	hsa-miR-139-5p	ENSG00000176986	SEC24C
ENSG00000215417.9	MIR17HG	MIMAT0000250	hsa-miR-139-5p	ENSG00000006062	MAP3K14
ENSG00000173811.9	CCDC13-AS1	MIMAT0000250	hsa-miR-139-5p	ENSG00000140451	PIF1
ENSG00000234883.3	MIR155HG	MIMAT0000250	hsa-miR-139-5p	ENSG00000107779	BMPR1A
ENSG00000215417.9	MIR17HG	MIMAT0000250	hsa-miR-139-5p	ENSG00000107779	BMPR1A
ENSG00000234883.3	MIR155HG	MIMAT0000250	hsa-miR-139-5p	ENSG00000186517	ARHGAP30
ENSG00000234883.3	MIR155HG	MIMAT0000250	hsa-miR-139-5p	ENSG00000154920	EME1
ENSG00000173811.9	CCDC13-AS1	MIMAT0000250	hsa-miR-139-5p	ENSG00000118513	MYB
ENSG00000236283.2	AC013463.2	MIMAT0000250	hsa-miR-139-5p	ENSG00000177606	JUN
ENSG00000173811.9	CCDC13-AS1	MIMAT0000250	hsa-miR-139-5p	ENSG00000177606	JUN
ENSG00000236283.2	AC013463.2	MIMAT0000250	hsa-miR-139-5p	ENSG00000135720	DYNC1LI2
ENSG00000215417.9	MIR17HG	MIMAT0000250	hsa-miR-139-5p	ENSG00000110917	MLEC
ENSG00000234883.3	MIR155HG	MIMAT0000250	hsa-miR-139-5p	ENSG00000105976	MET
ENSG00000234883.3	MIR155HG	MIMAT0000250	hsa-miR-139-5p	ENSG00000005249	PRKAR2B
ENSG00000234883.3	MIR155HG	MIMAT0000250	hsa-miR-139-5p	ENSG00000152601	MBNL1
ENSG00000274979.1	RP11-1143G9.5	MIMAT0000250	hsa-miR-139-5p	ENSG00000166086	JAM3
ENSG00000272264.1	RP11-92K15.3	MIMAT0000250	hsa-miR-139-5p	ENSG00000107779	BMPR1A
ENSG00000272264.1	RP11-92K15.3	MIMAT0000250	hsa-miR-139-5p	ENSG00000171848	RRM2
ENSG00000234883.3	MIR155HG	MIMAT0000250	hsa-miR-139-5p	ENSG00000113448	PDE4D
ENSG00000215417.9	MIR17HG	MIMAT0000250	hsa-miR-139-5p	ENSG00000264364	DYNLL2
ENSG00000236283.2	AC013463.2	MIMAT0000250	hsa-miR-139-5p	ENSG00000153214	TMEM87B
ENSG00000225975.5	LINC01534	MIMAT0000250	hsa-miR-139-5p	ENSG00000107779	BMPR1A
ENSG00000274979.1	RP11-1143G9.5	MIMAT0000250	hsa-miR-139-5p	ENSG00000156802	ATAD2
ENSG00000225975.5	LINC01534	MIMAT0000250	hsa-miR-139-5p	ENSG00000154920	EME1
ENSG00000215417.9	MIR17HG	MIMAT0000250	hsa-miR-139-5p	ENSG00000011426	ANLN
ENSG00000215417.9	MIR17HG	MIMAT0000250	hsa-miR-139-5p	ENSG00000140451	PIF1
ENSG00000234883.3	MIR155HG	MIMAT0000250	hsa-miR-139-5p	ENSG00000153214	TMEM87B
ENSG00000234883.3	MIR155HG	MIMAT0000250	hsa-miR-139-5p	ENSG00000177606	JUN
ENSG00000215417.9	MIR17HG	MIMAT0000250	hsa-miR-139-5p	ENSG00000176986	SEC24C
ENSG00000274979.1	RP11-1143G9.5	MIMAT0000250	hsa-miR-139-5p	ENSG00000135720	DYNC1LI2
ENSG00000234883.3	MIR155HG	MIMAT0000250	hsa-miR-139-5p	ENSG00000156802	ATAD2
ENSG00000272264.1	RP11-92K15.3	MIMAT0000250	hsa-miR-139-5p	ENSG00000140451	PIF1
ENSG00000274979.1	RP11-1143G9.5	MIMAT0000250	hsa-miR-139-5p	ENSG00000171848	RRM2
ENSG00000225975.5	LINC01534	MIMAT0000250	hsa-miR-139-5p	ENSG00000105976	MET
ENSG00000274979.1	RP11-1143G9.5	MIMAT0000250	hsa-miR-139-5p	ENSG00000005249	PRKAR2B
ENSG00000274979.1	RP11-1143G9.5	MIMAT0000250	hsa-miR-139-5p	ENSG00000177606	JUN
ENSG00000274979.1	RP11-1143G9.5	MIMAT0000250	hsa-miR-139-5p	ENSG00000158769	F11R
ENSG00000225975.5	LINC01534	MIMAT0000250	hsa-miR-139-5p	ENSG00000166086	JAM3
ENSG00000236283.2	AC013463.2	MIMAT0000250	hsa-miR-139-5p	ENSG00000156802	ATAD2
ENSG00000236283.2	AC013463.2	MIMAT0000250	hsa-miR-139-5p	ENSG00000264364	DYNLL2
ENSG00000173811.9	CCDC13-AS1	MIMAT0000250	hsa-miR-139-5p	ENSG00000109586	GALNT7
ENSG00000272264.1	RP11-92K15.3	MIMAT0000250	hsa-miR-139-5p	ENSG00000108306	FBXL20
ENSG00000272264.1	RP11-92K15.3	MIMAT0000250	hsa-miR-139-5p	ENSG00000166086	JAM3
ENSG00000274979.1	RP11-1143G9.5	MIMAT0000250	hsa-miR-139-5p	ENSG00000152601	MBNL1
ENSG00000274979.1	RP11-1143G9.5	MIMAT0000250	hsa-miR-139-5p	ENSG00000154920	EME1
ENSG00000272264.1	RP11-92K15.3	MIMAT0000250	hsa-miR-139-5p	ENSG00000156802	ATAD2
ENSG00000274979.1	RP11-1143G9.5	MIMAT0000250	hsa-miR-139-5p	ENSG00000051180	RAD51
ENSG00000234883.3	MIR155HG	MIMAT0000250	hsa-miR-139-5p	ENSG00000140451	PIF1
ENSG00000173811.9	CCDC13-AS1	MIMAT0000250	hsa-miR-139-5p	ENSG00000108306	FBXL20
ENSG00000236283.2	AC013463.2	MIMAT0000250	hsa-miR-139-5p	ENSG00000011426	ANLN
ENSG00000234883.3	MIR155HG	MIMAT0000250	hsa-miR-139-5p	ENSG00000163808	KIF15
ENSG00000274979.1	RP11-1143G9.5	MIMAT0000250	hsa-miR-139-5p	ENSG00000109586	GALNT7
ENSG00000272264.1	RP11-92K15.3	MIMAT0000250	hsa-miR-139-5p	ENSG00000105976	MET
ENSG00000215417.9	MIR17HG	MIMAT0000250	hsa-miR-139-5p	ENSG00000105976	MET
ENSG00000272264.1	RP11-92K15.3	MIMAT0000250	hsa-miR-139-5p	ENSG00000177606	JUN
ENSG00000272264.1	RP11-92K15.3	MIMAT0000250	hsa-miR-139-5p	ENSG00000171320	ESCO2
ENSG00000274979.1	RP11-1143G9.5	MIMAT0000250	hsa-miR-139-5p	ENSG00000006062	MAP3K14
ENSG00000274979.1	RP11-1143G9.5	MIMAT0000250	hsa-miR-139-5p	ENSG00000186517	ARHGAP30
ENSG00000272264.1	RP11-92K15.3	MIMAT0000250	hsa-miR-139-5p	ENSG00000186517	ARHGAP30
ENSG00000173811.9	CCDC13-AS1	MIMAT0000250	hsa-miR-139-5p	ENSG00000005249	PRKAR2B
ENSG00000173811.9	CCDC13-AS1	MIMAT0000250	hsa-miR-139-5p	ENSG00000107779	BMPR1A
ENSG00000236283.2	AC013463.2	MIMAT0000250	hsa-miR-139-5p	ENSG00000107779	BMPR1A
ENSG00000225975.5	LINC01534	MIMAT0000250	hsa-miR-139-5p	ENSG00000264364	DYNLL2
ENSG00000173811.9	CCDC13-AS1	MIMAT0000250	hsa-miR-139-5p	ENSG00000006062	MAP3K14
ENSG00000236283.2	AC013463.2	MIMAT0000250	hsa-miR-139-5p	ENSG00000051180	RAD51
ENSG00000272264.1	RP11-92K15.3	MIMAT0000250	hsa-miR-139-5p	ENSG00000176986	SEC24C
ENSG00000236283.2	AC013463.2	MIMAT0000250	hsa-miR-139-5p	ENSG00000140451	PIF1
ENSG00000274979.1	RP11-1143G9.5	MIMAT0000250	hsa-miR-139-5p	ENSG00000140451	PIF1
ENSG00000173811.9	CCDC13-AS1	MIMAT0000250	hsa-miR-139-5p	ENSG00000171320	ESCO2
ENSG00000272264.1	RP11-92K15.3	MIMAT0000250	hsa-miR-139-5p	ENSG00000109586	GALNT7
ENSG00000272264.1	RP11-92K15.3	MIMAT0000250	hsa-miR-139-5p	ENSG00000135720	DYNC1LI2
ENSG00000236283.2	AC013463.2	MIMAT0000250	hsa-miR-139-5p	ENSG00000176986	SEC24C
ENSG00000173811.9	CCDC13-AS1	MIMAT0000250	hsa-miR-139-5p	ENSG00000158769	F11R
ENSG00000173811.9	CCDC13-AS1	MIMAT0000250	hsa-miR-139-5p	ENSG00000156802	ATAD2
ENSG00000173811.9	CCDC13-AS1	MIMAT0000250	hsa-miR-139-5p	ENSG00000135720	DYNC1LI2
ENSG00000236283.2	AC013463.2	MIMAT0000250	hsa-miR-139-5p	ENSG00000152601	MBNL1
ENSG00000215417.9	MIR17HG	MIMAT0000250	hsa-miR-139-5p	ENSG00000156802	ATAD2
ENSG00000272264.1	RP11-92K15.3	MIMAT0000250	hsa-miR-139-5p	ENSG00000163808	KIF15
ENSG00000274979.1	RP11-1143G9.5	MIMAT0000250	hsa-miR-139-5p	ENSG00000110917	MLEC
ENSG00000215417.9	MIR17HG	MIMAT0000250	hsa-miR-139-5p	ENSG00000153214	TMEM87B
ENSG00000272264.1	RP11-92K15.3	MIMAT0000250	hsa-miR-139-5p	ENSG00000011426	ANLN
ENSG00000272264.1	RP11-92K15.3	MIMAT0000250	hsa-miR-139-5p	ENSG00000006062	MAP3K14
ENSG00000274979.1	RP11-1143G9.5	MIMAT0000250	hsa-miR-139-5p	ENSG00000153214	TMEM87B
ENSG00000272264.1	RP11-92K15.3	MIMAT0000250	hsa-miR-139-5p	ENSG00000110917	MLEC
ENSG00000274979.1	RP11-1143G9.5	MIMAT0000250	hsa-miR-139-5p	ENSG00000176986	SEC24C
ENSG00000272264.1	RP11-92K15.3	MIMAT0000250	hsa-miR-139-5p	ENSG00000152601	MBNL1
ENSG00000173811.9	CCDC13-AS1	MIMAT0000250	hsa-miR-139-5p	ENSG00000105281	SLC1A5
ENSG00000234883.3	MIR155HG	MIMAT0000250	hsa-miR-139-5p	ENSG00000011426	ANLN
ENSG00000272264.1	RP11-92K15.3	MIMAT0000250	hsa-miR-139-5p	ENSG00000118513	MYB
ENSG00000236283.2	AC013463.2	MIMAT0000250	hsa-miR-139-5p	ENSG00000113448	PDE4D
ENSG00000173811.9	CCDC13-AS1	MIMAT0000250	hsa-miR-139-5p	ENSG00000186517	ARHGAP30
ENSG00000272264.1	RP11-92K15.3	MIMAT0000250	hsa-miR-139-5p	ENSG00000154920	EME1
ENSG00000215417.9	MIR17HG	MIMAT0000250	hsa-miR-139-5p	ENSG00000177606	JUN
ENSG00000274979.1	RP11-1143G9.5	MIMAT0000250	hsa-miR-139-5p	ENSG00000163808	KIF15
ENSG00000215417.9	MIR17HG	MIMAT0000250	hsa-miR-139-5p	ENSG00000171848	RRM2
ENSG00000215417.9	MIR17HG	MIMAT0000250	hsa-miR-139-5p	ENSG00000109586	GALNT7
ENSG00000234883.3	MIR155HG	MIMAT0000250	hsa-miR-139-5p	ENSG00000006062	MAP3K14
ENSG00000272264.1	RP11-92K15.3	MIMAT0000250	hsa-miR-139-5p	ENSG00000153214	TMEM87B
ENSG00000272264.1	RP11-92K15.3	MIMAT0000250	hsa-miR-139-5p	ENSG00000005249	PRKAR2B
ENSG00000215417.9	MIR17HG	MIMAT0000250	hsa-miR-139-5p	ENSG00000154920	EME1
ENSG00000215417.9	MIR17HG	MIMAT0000250	hsa-miR-139-5p	ENSG00000051180	RAD51
ENSG00000234883.3	MIR155HG	MIMAT0000250	hsa-miR-139-5p	ENSG00000118513	MYB
ENSG00000173811.9	CCDC13-AS1	MIMAT0000250	hsa-miR-139-5p	ENSG00000154920	EME1
ENSG00000274979.1	RP11-1143G9.5	MIMAT0000250	hsa-miR-139-5p	ENSG00000107779	BMPR1A
ENSG00000173811.9	CCDC13-AS1	MIMAT0000250	hsa-miR-139-5p	ENSG00000264364	DYNLL2
ENSG00000274979.1	RP11-1143G9.5	MIMAT0000250	hsa-miR-139-5p	ENSG00000118513	MYB
ENSG00000215417.9	MIR17HG	MIMAT0000250	hsa-miR-139-5p	ENSG00000171320	ESCO2
ENSG00000260400.1	RP11-119F7.5	MIMAT0000431	hsa-miR-140-5p	ENSG00000125912	NCLN
ENSG00000223478.1	RP11-545E17.3	MIMAT0000431	hsa-miR-140-5p	ENSG00000125912	NCLN
ENSG00000260400.1	RP11-119F7.5	MIMAT0000431	hsa-miR-140-5p	ENSG00000163820	FYCO1
ENSG00000223478.1	RP11-545E17.3	MIMAT0000431	hsa-miR-140-5p	ENSG00000105576	TNPO2
ENSG00000223478.1	RP11-545E17.3	MIMAT0000431	hsa-miR-140-5p	ENSG00000110917	MLEC
ENSG00000223478.1	RP11-545E17.3	MIMAT0000431	hsa-miR-140-5p	ENSG00000104738	MCM4
ENSG00000223478.1	RP11-545E17.3	MIMAT0000431	hsa-miR-140-5p	ENSG00000135720	DYNC1LI2
ENSG00000223478.1	RP11-545E17.3	MIMAT0000431	hsa-miR-140-5p	ENSG00000152601	MBNL1
ENSG00000223478.1	RP11-545E17.3	MIMAT0000431	hsa-miR-140-5p	ENSG00000105976	MET
ENSG00000254027.1	RP11-363E6.3	MIMAT0000431	hsa-miR-140-5p	ENSG00000102181	CD99L2
ENSG00000223478.1	RP11-545E17.3	MIMAT0000431	hsa-miR-140-5p	ENSG00000172081	MOB3A
ENSG00000260400.1	RP11-119F7.5	MIMAT0000431	hsa-miR-140-5p	ENSG00000171848	RRM2
ENSG00000223478.1	RP11-545E17.3	MIMAT0000431	hsa-miR-140-5p	ENSG00000119969	HELLS
ENSG00000223478.1	RP11-545E17.3	MIMAT0000431	hsa-miR-140-5p	ENSG00000172575	RASGRP1
ENSG00000223478.1	RP11-545E17.3	MIMAT0000431	hsa-miR-140-5p	ENSG00000107779	BMPR1A
ENSG00000254027.1	RP11-363E6.3	MIMAT0000431	hsa-miR-140-5p	ENSG00000110917	MLEC
ENSG00000223478.1	RP11-545E17.3	MIMAT0000431	hsa-miR-140-5p	ENSG00000163820	FYCO1
ENSG00000260400.1	RP11-119F7.5	MIMAT0000431	hsa-miR-140-5p	ENSG00000160199	PKNOX1
ENSG00000260400.1	RP11-119F7.5	MIMAT0000431	hsa-miR-140-5p	ENSG00000115415	STAT1
ENSG00000260400.1	RP11-119F7.5	MIMAT0000431	hsa-miR-140-5p	ENSG00000152601	MBNL1
ENSG00000260400.1	RP11-119F7.5	MIMAT0000431	hsa-miR-140-5p	ENSG00000135720	DYNC1LI2
ENSG00000254027.1	RP11-363E6.3	MIMAT0000431	hsa-miR-140-5p	ENSG00000166086	JAM3
ENSG00000223478.1	RP11-545E17.3	MIMAT0000431	hsa-miR-140-5p	ENSG00000134874	DZIP1
ENSG00000254027.1	RP11-363E6.3	MIMAT0000431	hsa-miR-140-5p	ENSG00000104067	TJP1
ENSG00000223478.1	RP11-545E17.3	MIMAT0000431	hsa-miR-140-5p	ENSG00000115415	STAT1
ENSG00000254027.1	RP11-363E6.3	MIMAT0000431	hsa-miR-140-5p	ENSG00000135365	PHF21A
ENSG00000260400.1	RP11-119F7.5	MIMAT0000431	hsa-miR-140-5p	ENSG00000135365	PHF21A
ENSG00000223478.1	RP11-545E17.3	MIMAT0000431	hsa-miR-140-5p	ENSG00000156802	ATAD2
ENSG00000254027.1	RP11-363E6.3	MIMAT0000431	hsa-miR-140-5p	ENSG00000119969	HELLS
ENSG00000260400.1	RP11-119F7.5	MIMAT0000431	hsa-miR-140-5p	ENSG00000105976	MET
ENSG00000260400.1	RP11-119F7.5	MIMAT0000431	hsa-miR-140-5p	ENSG00000107779	BMPR1A
ENSG00000254027.1	RP11-363E6.3	MIMAT0000431	hsa-miR-140-5p	ENSG00000152601	MBNL1
ENSG00000223478.1	RP11-545E17.3	MIMAT0000431	hsa-miR-140-5p	ENSG00000166086	JAM3
ENSG00000260400.1	RP11-119F7.5	MIMAT0000431	hsa-miR-140-5p	ENSG00000134874	DZIP1
ENSG00000223478.1	RP11-545E17.3	MIMAT0000431	hsa-miR-140-5p	ENSG00000158769	F11R
ENSG00000260400.1	RP11-119F7.5	MIMAT0000431	hsa-miR-140-5p	ENSG00000104738	MCM4
ENSG00000223478.1	RP11-545E17.3	MIMAT0000431	hsa-miR-140-5p	ENSG00000006062	MAP3K14
ENSG00000223478.1	RP11-545E17.3	MIMAT0000431	hsa-miR-140-5p	ENSG00000135365	PHF21A
ENSG00000223478.1	RP11-545E17.3	MIMAT0000431	hsa-miR-140-5p	ENSG00000104067	TJP1
ENSG00000254027.1	RP11-363E6.3	MIMAT0000431	hsa-miR-140-5p	ENSG00000006062	MAP3K14
ENSG00000254027.1	RP11-363E6.3	MIMAT0000431	hsa-miR-140-5p	ENSG00000125912	NCLN
ENSG00000254027.1	RP11-363E6.3	MIMAT0000431	hsa-miR-140-5p	ENSG00000134874	DZIP1
ENSG00000260400.1	RP11-119F7.5	MIMAT0000431	hsa-miR-140-5p	ENSG00000102181	CD99L2
ENSG00000260400.1	RP11-119F7.5	MIMAT0000431	hsa-miR-140-5p	ENSG00000006062	MAP3K14
ENSG00000260400.1	RP11-119F7.5	MIMAT0000431	hsa-miR-140-5p	ENSG00000110917	MLEC
ENSG00000254027.1	RP11-363E6.3	MIMAT0000431	hsa-miR-140-5p	ENSG00000115415	STAT1
ENSG00000260400.1	RP11-119F7.5	MIMAT0000431	hsa-miR-140-5p	ENSG00000172081	MOB3A
ENSG00000254027.1	RP11-363E6.3	MIMAT0000431	hsa-miR-140-5p	ENSG00000154920	EME1
ENSG00000223478.1	RP11-545E17.3	MIMAT0000431	hsa-miR-140-5p	ENSG00000154096	THY1
ENSG00000223478.1	RP11-545E17.3	MIMAT0000431	hsa-miR-140-5p	ENSG00000160199	PKNOX1
ENSG00000254027.1	RP11-363E6.3	MIMAT0000431	hsa-miR-140-5p	ENSG00000163820	FYCO1
ENSG00000254027.1	RP11-363E6.3	MIMAT0000431	hsa-miR-140-5p	ENSG00000172081	MOB3A
ENSG00000254027.1	RP11-363E6.3	MIMAT0000431	hsa-miR-140-5p	ENSG00000160199	PKNOX1
ENSG00000223478.1	RP11-545E17.3	MIMAT0000431	hsa-miR-140-5p	ENSG00000171848	RRM2
ENSG00000254027.1	RP11-363E6.3	MIMAT0000431	hsa-miR-140-5p	ENSG00000156802	ATAD2
ENSG00000260400.1	RP11-119F7.5	MIMAT0000431	hsa-miR-140-5p	ENSG00000154920	EME1
ENSG00000254027.1	RP11-363E6.3	MIMAT0000431	hsa-miR-140-5p	ENSG00000154096	THY1
ENSG00000254027.1	RP11-363E6.3	MIMAT0000431	hsa-miR-140-5p	ENSG00000172575	RASGRP1
ENSG00000254027.1	RP11-363E6.3	MIMAT0000431	hsa-miR-140-5p	ENSG00000105976	MET
ENSG00000223478.1	RP11-545E17.3	MIMAT0000431	hsa-miR-140-5p	ENSG00000102181	CD99L2
ENSG00000260400.1	RP11-119F7.5	MIMAT0000431	hsa-miR-140-5p	ENSG00000156802	ATAD2
ENSG00000223478.1	RP11-545E17.3	MIMAT0000431	hsa-miR-140-5p	ENSG00000264364	DYNLL2
ENSG00000254027.1	RP11-363E6.3	MIMAT0000431	hsa-miR-140-5p	ENSG00000051180	RAD51
ENSG00000260400.1	RP11-119F7.5	MIMAT0000431	hsa-miR-140-5p	ENSG00000264364	DYNLL2
ENSG00000254027.1	RP11-363E6.3	MIMAT0000431	hsa-miR-140-5p	ENSG00000105576	TNPO2
ENSG00000260400.1	RP11-119F7.5	MIMAT0000431	hsa-miR-140-5p	ENSG00000051180	RAD51
ENSG00000260400.1	RP11-119F7.5	MIMAT0000431	hsa-miR-140-5p	ENSG00000104067	TJP1
ENSG00000254027.1	RP11-363E6.3	MIMAT0000431	hsa-miR-140-5p	ENSG00000264364	DYNLL2
ENSG00000254027.1	RP11-363E6.3	MIMAT0000431	hsa-miR-140-5p	ENSG00000135720	DYNC1LI2
ENSG00000260400.1	RP11-119F7.5	MIMAT0000431	hsa-miR-140-5p	ENSG00000166086	JAM3
ENSG00000260400.1	RP11-119F7.5	MIMAT0000431	hsa-miR-140-5p	ENSG00000105576	TNPO2
ENSG00000260400.1	RP11-119F7.5	MIMAT0000431	hsa-miR-140-5p	ENSG00000158769	F11R
ENSG00000223478.1	RP11-545E17.3	MIMAT0000431	hsa-miR-140-5p	ENSG00000051180	RAD51
ENSG00000254027.1	RP11-363E6.3	MIMAT0000431	hsa-miR-140-5p	ENSG00000104738	MCM4
ENSG00000254027.1	RP11-363E6.3	MIMAT0000431	hsa-miR-140-5p	ENSG00000107779	BMPR1A
ENSG00000260400.1	RP11-119F7.5	MIMAT0000431	hsa-miR-140-5p	ENSG00000119969	HELLS
ENSG00000223478.1	RP11-545E17.3	MIMAT0000431	hsa-miR-140-5p	ENSG00000154920	EME1
ENSG00000254027.1	RP11-363E6.3	MIMAT0000431	hsa-miR-140-5p	ENSG00000158769	F11R
ENSG00000260400.1	RP11-119F7.5	MIMAT0000431	hsa-miR-140-5p	ENSG00000172575	RASGRP1
ENSG00000260400.1	RP11-119F7.5	MIMAT0000431	hsa-miR-140-5p	ENSG00000154096	THY1
ENSG00000254027.1	RP11-363E6.3	MIMAT0000431	hsa-miR-140-5p	ENSG00000171848	RRM2
ENSG00000274828.1	RP11-567M16.6	MIMAT0000432	hsa-miR-141-3p	ENSG00000177606	JUN
ENSG00000274828.1	RP11-567M16.6	MIMAT0000432	hsa-miR-141-3p	ENSG00000119969	HELLS
ENSG00000274828.1	RP11-567M16.6	MIMAT0000432	hsa-miR-141-3p	ENSG00000104067	TJP1
ENSG00000274828.1	RP11-567M16.6	MIMAT0000432	hsa-miR-141-3p	ENSG00000113448	PDE4D
ENSG00000270019.1	RP11-141B14.1	MIMAT0000432	hsa-miR-141-3p	ENSG00000105976	MET
ENSG00000270019.1	RP11-141B14.1	MIMAT0000432	hsa-miR-141-3p	ENSG00000163739	CXCL1
ENSG00000270019.1	RP11-141B14.1	MIMAT0000432	hsa-miR-141-3p	ENSG00000012048	BRCA1
ENSG00000270019.1	RP11-141B14.1	MIMAT0000432	hsa-miR-141-3p	ENSG00000171848	RRM2
ENSG00000270019.1	RP11-141B14.1	MIMAT0000432	hsa-miR-141-3p	ENSG00000186187	ZNRF1
ENSG00000270019.1	RP11-141B14.1	MIMAT0000432	hsa-miR-141-3p	ENSG00000134874	DZIP1
ENSG00000270019.1	RP11-141B14.1	MIMAT0000432	hsa-miR-141-3p	ENSG00000140451	PIF1
ENSG00000274828.1	RP11-567M16.6	MIMAT0000432	hsa-miR-141-3p	ENSG00000109586	GALNT7
ENSG00000274828.1	RP11-567M16.6	MIMAT0000432	hsa-miR-141-3p	ENSG00000140853	NLRC5
ENSG00000270019.1	RP11-141B14.1	MIMAT0000432	hsa-miR-141-3p	ENSG00000140853	NLRC5
ENSG00000274828.1	RP11-567M16.6	MIMAT0000432	hsa-miR-141-3p	ENSG00000152601	MBNL1
ENSG00000274828.1	RP11-567M16.6	MIMAT0000432	hsa-miR-141-3p	ENSG00000135365	PHF21A
ENSG00000274828.1	RP11-567M16.6	MIMAT0000432	hsa-miR-141-3p	ENSG00000171848	RRM2
ENSG00000274828.1	RP11-567M16.6	MIMAT0000432	hsa-miR-141-3p	ENSG00000166086	JAM3
ENSG00000274828.1	RP11-567M16.6	MIMAT0000432	hsa-miR-141-3p	ENSG00000276043	UHRF1
ENSG00000274828.1	RP11-567M16.6	MIMAT0000432	hsa-miR-141-3p	ENSG00000163739	CXCL1
ENSG00000274828.1	RP11-567M16.6	MIMAT0000432	hsa-miR-141-3p	ENSG00000125740	FOSB
ENSG00000274828.1	RP11-567M16.6	MIMAT0000432	hsa-miR-141-3p	ENSG00000108306	FBXL20
ENSG00000270019.1	RP11-141B14.1	MIMAT0000432	hsa-miR-141-3p	ENSG00000264364	DYNLL2
ENSG00000270019.1	RP11-141B14.1	MIMAT0000432	hsa-miR-141-3p	ENSG00000100906	NFKBIA
ENSG00000274828.1	RP11-567M16.6	MIMAT0000432	hsa-miR-141-3p	ENSG00000105976	MET
ENSG00000274828.1	RP11-567M16.6	MIMAT0000432	hsa-miR-141-3p	ENSG00000100906	NFKBIA
ENSG00000274828.1	RP11-567M16.6	MIMAT0000432	hsa-miR-141-3p	ENSG00000145244	CORIN
ENSG00000274828.1	RP11-567M16.6	MIMAT0000432	hsa-miR-141-3p	ENSG00000011426	ANLN
ENSG00000274828.1	RP11-567M16.6	MIMAT0000432	hsa-miR-141-3p	ENSG00000152217	SETBP1
ENSG00000270019.1	RP11-141B14.1	MIMAT0000432	hsa-miR-141-3p	ENSG00000276043	UHRF1
ENSG00000270019.1	RP11-141B14.1	MIMAT0000432	hsa-miR-141-3p	ENSG00000110917	MLEC
ENSG00000274828.1	RP11-567M16.6	MIMAT0000432	hsa-miR-141-3p	ENSG00000138346	DNA2
ENSG00000274828.1	RP11-567M16.6	MIMAT0000432	hsa-miR-141-3p	ENSG00000143924	EML4
ENSG00000270019.1	RP11-141B14.1	MIMAT0000432	hsa-miR-141-3p	ENSG00000143924	EML4
ENSG00000274828.1	RP11-567M16.6	MIMAT0000432	hsa-miR-141-3p	ENSG00000186187	ZNRF1
ENSG00000270019.1	RP11-141B14.1	MIMAT0000432	hsa-miR-141-3p	ENSG00000153214	TMEM87B
ENSG00000270019.1	RP11-141B14.1	MIMAT0000432	hsa-miR-141-3p	ENSG00000011426	ANLN
ENSG00000270019.1	RP11-141B14.1	MIMAT0000432	hsa-miR-141-3p	ENSG00000135365	PHF21A
ENSG00000274828.1	RP11-567M16.6	MIMAT0000432	hsa-miR-141-3p	ENSG00000176208	ATAD5
ENSG00000274828.1	RP11-567M16.6	MIMAT0000432	hsa-miR-141-3p	ENSG00000134874	DZIP1
ENSG00000270019.1	RP11-141B14.1	MIMAT0000432	hsa-miR-141-3p	ENSG00000113448	PDE4D
ENSG00000274828.1	RP11-567M16.6	MIMAT0000432	hsa-miR-141-3p	ENSG00000160199	PKNOX1
ENSG00000274828.1	RP11-567M16.6	MIMAT0000432	hsa-miR-141-3p	ENSG00000110917	MLEC
ENSG00000270019.1	RP11-141B14.1	MIMAT0000432	hsa-miR-141-3p	ENSG00000125740	FOSB
ENSG00000270019.1	RP11-141B14.1	MIMAT0000432	hsa-miR-141-3p	ENSG00000177606	JUN
ENSG00000274828.1	RP11-567M16.6	MIMAT0000432	hsa-miR-141-3p	ENSG00000146648	EGFR
ENSG00000270019.1	RP11-141B14.1	MIMAT0000432	hsa-miR-141-3p	ENSG00000152601	MBNL1
ENSG00000270019.1	RP11-141B14.1	MIMAT0000432	hsa-miR-141-3p	ENSG00000109586	GALNT7
ENSG00000270019.1	RP11-141B14.1	MIMAT0000432	hsa-miR-141-3p	ENSG00000146648	EGFR
ENSG00000270019.1	RP11-141B14.1	MIMAT0000432	hsa-miR-141-3p	ENSG00000166086	JAM3
ENSG00000274828.1	RP11-567M16.6	MIMAT0000432	hsa-miR-141-3p	ENSG00000012048	BRCA1
ENSG00000274828.1	RP11-567M16.6	MIMAT0000432	hsa-miR-141-3p	ENSG00000140451	PIF1
ENSG00000274828.1	RP11-567M16.6	MIMAT0000432	hsa-miR-141-3p	ENSG00000135905	DOCK10
ENSG00000270019.1	RP11-141B14.1	MIMAT0000432	hsa-miR-141-3p	ENSG00000152217	SETBP1
ENSG00000270019.1	RP11-141B14.1	MIMAT0000432	hsa-miR-141-3p	ENSG00000160199	PKNOX1
ENSG00000270019.1	RP11-141B14.1	MIMAT0000432	hsa-miR-141-3p	ENSG00000104067	TJP1
ENSG00000270019.1	RP11-141B14.1	MIMAT0000432	hsa-miR-141-3p	ENSG00000176208	ATAD5
ENSG00000274828.1	RP11-567M16.6	MIMAT0000432	hsa-miR-141-3p	ENSG00000264364	DYNLL2
ENSG00000270019.1	RP11-141B14.1	MIMAT0000432	hsa-miR-141-3p	ENSG00000119969	HELLS
ENSG00000270019.1	RP11-141B14.1	MIMAT0000432	hsa-miR-141-3p	ENSG00000138346	DNA2
ENSG00000270019.1	RP11-141B14.1	MIMAT0000432	hsa-miR-141-3p	ENSG00000135905	DOCK10
ENSG00000270019.1	RP11-141B14.1	MIMAT0000432	hsa-miR-141-3p	ENSG00000108306	FBXL20
ENSG00000270019.1	RP11-141B14.1	MIMAT0000432	hsa-miR-141-3p	ENSG00000145244	CORIN
ENSG00000274828.1	RP11-567M16.6	MIMAT0000432	hsa-miR-141-3p	ENSG00000153214	TMEM87B
ENSG00000272763.1	RP11-357H14.17	MIMAT0000434	hsa-miR-142-3p	ENSG00000172575	RASGRP1
ENSG00000254094.1	AC078852.1	MIMAT0000434	hsa-miR-142-3p	ENSG00000115415	STAT1
ENSG00000254094.1	AC078852.1	MIMAT0000434	hsa-miR-142-3p	ENSG00000166086	JAM3
ENSG00000254094.1	AC078852.1	MIMAT0000434	hsa-miR-142-3p	ENSG00000153214	TMEM87B
ENSG00000254094.1	AC078852.1	MIMAT0000434	hsa-miR-142-3p	ENSG00000134326	CMPK2
ENSG00000272763.1	RP11-357H14.17	MIMAT0000434	hsa-miR-142-3p	ENSG00000134874	DZIP1
ENSG00000272763.1	RP11-357H14.17	MIMAT0000434	hsa-miR-142-3p	ENSG00000153214	TMEM87B
ENSG00000272763.1	RP11-357H14.17	MIMAT0000434	hsa-miR-142-3p	ENSG00000137841	PLCB2
ENSG00000254094.1	AC078852.1	MIMAT0000434	hsa-miR-142-3p	ENSG00000075702	WDR62
ENSG00000254094.1	AC078852.1	MIMAT0000434	hsa-miR-142-3p	ENSG00000011426	ANLN
ENSG00000272763.1	RP11-357H14.17	MIMAT0000434	hsa-miR-142-3p	ENSG00000115415	STAT1
ENSG00000254094.1	AC078852.1	MIMAT0000434	hsa-miR-142-3p	ENSG00000163820	FYCO1
ENSG00000272763.1	RP11-357H14.17	MIMAT0000434	hsa-miR-142-3p	ENSG00000011426	ANLN
ENSG00000272763.1	RP11-357H14.17	MIMAT0000434	hsa-miR-142-3p	ENSG00000134326	CMPK2
ENSG00000254094.1	AC078852.1	MIMAT0000434	hsa-miR-142-3p	ENSG00000024526	DEPDC1
ENSG00000272763.1	RP11-357H14.17	MIMAT0000434	hsa-miR-142-3p	ENSG00000113448	PDE4D
ENSG00000272763.1	RP11-357H14.17	MIMAT0000434	hsa-miR-142-3p	ENSG00000104067	TJP1
ENSG00000254094.1	AC078852.1	MIMAT0000434	hsa-miR-142-3p	ENSG00000134874	DZIP1
ENSG00000254094.1	AC078852.1	MIMAT0000434	hsa-miR-142-3p	ENSG00000143924	EML4
ENSG00000254094.1	AC078852.1	MIMAT0000434	hsa-miR-142-3p	ENSG00000172575	RASGRP1
ENSG00000254094.1	AC078852.1	MIMAT0000434	hsa-miR-142-3p	ENSG00000137841	PLCB2
ENSG00000254094.1	AC078852.1	MIMAT0000434	hsa-miR-142-3p	ENSG00000135720	DYNC1LI2
ENSG00000272763.1	RP11-357H14.17	MIMAT0000434	hsa-miR-142-3p	ENSG00000119969	HELLS
ENSG00000272763.1	RP11-357H14.17	MIMAT0000434	hsa-miR-142-3p	ENSG00000152689	RASGRP3
ENSG00000272763.1	RP11-357H14.17	MIMAT0000434	hsa-miR-142-3p	ENSG00000143924	EML4
ENSG00000272763.1	RP11-357H14.17	MIMAT0000434	hsa-miR-142-3p	ENSG00000166086	JAM3
ENSG00000272763.1	RP11-357H14.17	MIMAT0000434	hsa-miR-142-3p	ENSG00000135720	DYNC1LI2
ENSG00000254094.1	AC078852.1	MIMAT0000434	hsa-miR-142-3p	ENSG00000152689	RASGRP3
ENSG00000254094.1	AC078852.1	MIMAT0000434	hsa-miR-142-3p	ENSG00000058804	NDC1
ENSG00000272763.1	RP11-357H14.17	MIMAT0000434	hsa-miR-142-3p	ENSG00000024526	DEPDC1
ENSG00000254094.1	AC078852.1	MIMAT0000434	hsa-miR-142-3p	ENSG00000113448	PDE4D
ENSG00000272763.1	RP11-357H14.17	MIMAT0000434	hsa-miR-142-3p	ENSG00000058804	NDC1
ENSG00000272763.1	RP11-357H14.17	MIMAT0000434	hsa-miR-142-3p	ENSG00000163820	FYCO1
ENSG00000272763.1	RP11-357H14.17	MIMAT0000434	hsa-miR-142-3p	ENSG00000075702	WDR62
ENSG00000254094.1	AC078852.1	MIMAT0000434	hsa-miR-142-3p	ENSG00000119969	HELLS
ENSG00000254094.1	AC078852.1	MIMAT0000434	hsa-miR-142-3p	ENSG00000104067	TJP1
ENSG00000269937.1	RP11-20I23.8	MIMAT0000433	hsa-miR-142-5p	ENSG00000160199	PKNOX1
ENSG00000179818.12	PCBP1-AS1	MIMAT0000433	hsa-miR-142-5p	ENSG00000058804	NDC1
ENSG00000269937.1	RP11-20I23.8	MIMAT0000433	hsa-miR-142-5p	ENSG00000127586	CHTF18
ENSG00000229956.8	ZRANB2-AS2	MIMAT0000433	hsa-miR-142-5p	ENSG00000127586	CHTF18
ENSG00000179818.12	PCBP1-AS1	MIMAT0000433	hsa-miR-142-5p	ENSG00000151503	NCAPD3
ENSG00000229956.8	ZRANB2-AS2	MIMAT0000433	hsa-miR-142-5p	ENSG00000011426	ANLN
ENSG00000229956.8	ZRANB2-AS2	MIMAT0000433	hsa-miR-142-5p	ENSG00000169429	CXCL8
ENSG00000234203.1	RP5-1050D4.2	MIMAT0000433	hsa-miR-142-5p	ENSG00000166851	PLK1
ENSG00000269937.1	RP11-20I23.8	MIMAT0000433	hsa-miR-142-5p	ENSG00000109586	GALNT7
ENSG00000269937.1	RP11-20I23.8	MIMAT0000433	hsa-miR-142-5p	ENSG00000107779	BMPR1A
ENSG00000229956.8	ZRANB2-AS2	MIMAT0000433	hsa-miR-142-5p	ENSG00000024526	DEPDC1
ENSG00000269937.1	RP11-20I23.8	MIMAT0000433	hsa-miR-142-5p	ENSG00000125740	FOSB
ENSG00000234203.1	RP5-1050D4.2	MIMAT0000433	hsa-miR-142-5p	ENSG00000171320	ESCO2
ENSG00000269937.1	RP11-20I23.8	MIMAT0000433	hsa-miR-142-5p	ENSG00000113448	PDE4D
ENSG00000234203.1	RP5-1050D4.2	MIMAT0000433	hsa-miR-142-5p	ENSG00000125740	FOSB
ENSG00000269937.1	RP11-20I23.8	MIMAT0000433	hsa-miR-142-5p	ENSG00000135905	DOCK10
ENSG00000269937.1	RP11-20I23.8	MIMAT0000433	hsa-miR-142-5p	ENSG00000156802	ATAD2
ENSG00000229956.8	ZRANB2-AS2	MIMAT0000433	hsa-miR-142-5p	ENSG00000264364	DYNLL2
ENSG00000234203.1	RP5-1050D4.2	MIMAT0000433	hsa-miR-142-5p	ENSG00000011426	ANLN
ENSG00000261534.1	RP11-244O19.1	MIMAT0000433	hsa-miR-142-5p	ENSG00000264364	DYNLL2
ENSG00000179818.12	PCBP1-AS1	MIMAT0000433	hsa-miR-142-5p	ENSG00000125740	FOSB
ENSG00000179818.12	PCBP1-AS1	MIMAT0000433	hsa-miR-142-5p	ENSG00000264364	DYNLL2
ENSG00000229956.8	ZRANB2-AS2	MIMAT0000433	hsa-miR-142-5p	ENSG00000121152	NCAPH
ENSG00000234203.1	RP5-1050D4.2	MIMAT0000433	hsa-miR-142-5p	ENSG00000123358	NR4A1
ENSG00000269937.1	RP11-20I23.8	MIMAT0000433	hsa-miR-142-5p	ENSG00000198554	WDHD1
ENSG00000179818.12	PCBP1-AS1	MIMAT0000433	hsa-miR-142-5p	ENSG00000121152	NCAPH
ENSG00000269937.1	RP11-20I23.8	MIMAT0000433	hsa-miR-142-5p	ENSG00000123358	NR4A1
ENSG00000261534.1	RP11-244O19.1	MIMAT0000433	hsa-miR-142-5p	ENSG00000163820	FYCO1
ENSG00000269937.1	RP11-20I23.8	MIMAT0000433	hsa-miR-142-5p	ENSG00000166851	PLK1
ENSG00000261534.1	RP11-244O19.1	MIMAT0000433	hsa-miR-142-5p	ENSG00000058804	NDC1
ENSG00000179818.12	PCBP1-AS1	MIMAT0000433	hsa-miR-142-5p	ENSG00000160199	PKNOX1
ENSG00000234203.1	RP5-1050D4.2	MIMAT0000433	hsa-miR-142-5p	ENSG00000110917	MLEC
ENSG00000269937.1	RP11-20I23.8	MIMAT0000433	hsa-miR-142-5p	ENSG00000110917	MLEC
ENSG00000229956.8	ZRANB2-AS2	MIMAT0000433	hsa-miR-142-5p	ENSG00000198554	WDHD1
ENSG00000179818.12	PCBP1-AS1	MIMAT0000433	hsa-miR-142-5p	ENSG00000127586	CHTF18
ENSG00000234203.1	RP5-1050D4.2	MIMAT0000433	hsa-miR-142-5p	ENSG00000135905	DOCK10
ENSG00000269937.1	RP11-20I23.8	MIMAT0000433	hsa-miR-142-5p	ENSG00000121152	NCAPH
ENSG00000229956.8	ZRANB2-AS2	MIMAT0000433	hsa-miR-142-5p	ENSG00000171320	ESCO2
ENSG00000261534.1	RP11-244O19.1	MIMAT0000433	hsa-miR-142-5p	ENSG00000121152	NCAPH
ENSG00000179818.12	PCBP1-AS1	MIMAT0000433	hsa-miR-142-5p	ENSG00000116679	IVNS1ABP
ENSG00000229956.8	ZRANB2-AS2	MIMAT0000433	hsa-miR-142-5p	ENSG00000123358	NR4A1
ENSG00000179818.12	PCBP1-AS1	MIMAT0000433	hsa-miR-142-5p	ENSG00000198554	WDHD1
ENSG00000179818.12	PCBP1-AS1	MIMAT0000433	hsa-miR-142-5p	ENSG00000123358	NR4A1
ENSG00000261534.1	RP11-244O19.1	MIMAT0000433	hsa-miR-142-5p	ENSG00000135720	DYNC1LI2
ENSG00000234203.1	RP5-1050D4.2	MIMAT0000433	hsa-miR-142-5p	ENSG00000198554	WDHD1
ENSG00000234203.1	RP5-1050D4.2	MIMAT0000433	hsa-miR-142-5p	ENSG00000109586	GALNT7
ENSG00000269937.1	RP11-20I23.8	MIMAT0000433	hsa-miR-142-5p	ENSG00000135720	DYNC1LI2
ENSG00000234203.1	RP5-1050D4.2	MIMAT0000433	hsa-miR-142-5p	ENSG00000169429	CXCL8
ENSG00000179818.12	PCBP1-AS1	MIMAT0000433	hsa-miR-142-5p	ENSG00000163820	FYCO1
ENSG00000261534.1	RP11-244O19.1	MIMAT0000433	hsa-miR-142-5p	ENSG00000123358	NR4A1
ENSG00000261534.1	RP11-244O19.1	MIMAT0000433	hsa-miR-142-5p	ENSG00000198554	WDHD1
ENSG00000229956.8	ZRANB2-AS2	MIMAT0000433	hsa-miR-142-5p	ENSG00000151503	NCAPD3
ENSG00000261534.1	RP11-244O19.1	MIMAT0000433	hsa-miR-142-5p	ENSG00000127586	CHTF18
ENSG00000261534.1	RP11-244O19.1	MIMAT0000433	hsa-miR-142-5p	ENSG00000109586	GALNT7
ENSG00000179818.12	PCBP1-AS1	MIMAT0000433	hsa-miR-142-5p	ENSG00000171320	ESCO2
ENSG00000179818.12	PCBP1-AS1	MIMAT0000433	hsa-miR-142-5p	ENSG00000109586	GALNT7
ENSG00000261534.1	RP11-244O19.1	MIMAT0000433	hsa-miR-142-5p	ENSG00000110917	MLEC
ENSG00000234203.1	RP5-1050D4.2	MIMAT0000433	hsa-miR-142-5p	ENSG00000058804	NDC1
ENSG00000269937.1	RP11-20I23.8	MIMAT0000433	hsa-miR-142-5p	ENSG00000171320	ESCO2
ENSG00000179818.12	PCBP1-AS1	MIMAT0000433	hsa-miR-142-5p	ENSG00000110917	MLEC
ENSG00000179818.12	PCBP1-AS1	MIMAT0000433	hsa-miR-142-5p	ENSG00000107779	BMPR1A
ENSG00000261534.1	RP11-244O19.1	MIMAT0000433	hsa-miR-142-5p	ENSG00000024526	DEPDC1
ENSG00000269937.1	RP11-20I23.8	MIMAT0000433	hsa-miR-142-5p	ENSG00000024526	DEPDC1
ENSG00000261534.1	RP11-244O19.1	MIMAT0000433	hsa-miR-142-5p	ENSG00000169429	CXCL8
ENSG00000261534.1	RP11-244O19.1	MIMAT0000433	hsa-miR-142-5p	ENSG00000171320	ESCO2
ENSG00000261534.1	RP11-244O19.1	MIMAT0000433	hsa-miR-142-5p	ENSG00000125740	FOSB
ENSG00000269937.1	RP11-20I23.8	MIMAT0000433	hsa-miR-142-5p	ENSG00000169429	CXCL8
ENSG00000229956.8	ZRANB2-AS2	MIMAT0000433	hsa-miR-142-5p	ENSG00000110917	MLEC
ENSG00000229956.8	ZRANB2-AS2	MIMAT0000433	hsa-miR-142-5p	ENSG00000113448	PDE4D
ENSG00000229956.8	ZRANB2-AS2	MIMAT0000433	hsa-miR-142-5p	ENSG00000107779	BMPR1A
ENSG00000234203.1	RP5-1050D4.2	MIMAT0000433	hsa-miR-142-5p	ENSG00000160199	PKNOX1
ENSG00000234203.1	RP5-1050D4.2	MIMAT0000433	hsa-miR-142-5p	ENSG00000116679	IVNS1ABP
ENSG00000269937.1	RP11-20I23.8	MIMAT0000433	hsa-miR-142-5p	ENSG00000058804	NDC1
ENSG00000234203.1	RP5-1050D4.2	MIMAT0000433	hsa-miR-142-5p	ENSG00000163820	FYCO1
ENSG00000229956.8	ZRANB2-AS2	MIMAT0000433	hsa-miR-142-5p	ENSG00000109586	GALNT7
ENSG00000179818.12	PCBP1-AS1	MIMAT0000433	hsa-miR-142-5p	ENSG00000146648	EGFR
ENSG00000261534.1	RP11-244O19.1	MIMAT0000433	hsa-miR-142-5p	ENSG00000151503	NCAPD3
ENSG00000269937.1	RP11-20I23.8	MIMAT0000433	hsa-miR-142-5p	ENSG00000151503	NCAPD3
ENSG00000234203.1	RP5-1050D4.2	MIMAT0000433	hsa-miR-142-5p	ENSG00000107779	BMPR1A
ENSG00000234203.1	RP5-1050D4.2	MIMAT0000433	hsa-miR-142-5p	ENSG00000121152	NCAPH
ENSG00000234203.1	RP5-1050D4.2	MIMAT0000433	hsa-miR-142-5p	ENSG00000151503	NCAPD3
ENSG00000229956.8	ZRANB2-AS2	MIMAT0000433	hsa-miR-142-5p	ENSG00000135905	DOCK10
ENSG00000261534.1	RP11-244O19.1	MIMAT0000433	hsa-miR-142-5p	ENSG00000160199	PKNOX1
ENSG00000179818.12	PCBP1-AS1	MIMAT0000433	hsa-miR-142-5p	ENSG00000166851	PLK1
ENSG00000234203.1	RP5-1050D4.2	MIMAT0000433	hsa-miR-142-5p	ENSG00000156802	ATAD2
ENSG00000234203.1	RP5-1050D4.2	MIMAT0000433	hsa-miR-142-5p	ENSG00000127586	CHTF18
ENSG00000234203.1	RP5-1050D4.2	MIMAT0000433	hsa-miR-142-5p	ENSG00000264364	DYNLL2
ENSG00000269937.1	RP11-20I23.8	MIMAT0000433	hsa-miR-142-5p	ENSG00000116679	IVNS1ABP
ENSG00000179818.12	PCBP1-AS1	MIMAT0000433	hsa-miR-142-5p	ENSG00000135905	DOCK10
ENSG00000229956.8	ZRANB2-AS2	MIMAT0000433	hsa-miR-142-5p	ENSG00000156802	ATAD2
ENSG00000179818.12	PCBP1-AS1	MIMAT0000433	hsa-miR-142-5p	ENSG00000169429	CXCL8
ENSG00000229956.8	ZRANB2-AS2	MIMAT0000433	hsa-miR-142-5p	ENSG00000163820	FYCO1
ENSG00000269937.1	RP11-20I23.8	MIMAT0000433	hsa-miR-142-5p	ENSG00000264364	DYNLL2
ENSG00000179818.12	PCBP1-AS1	MIMAT0000433	hsa-miR-142-5p	ENSG00000024526	DEPDC1
ENSG00000229956.8	ZRANB2-AS2	MIMAT0000433	hsa-miR-142-5p	ENSG00000135720	DYNC1LI2
ENSG00000179818.12	PCBP1-AS1	MIMAT0000433	hsa-miR-142-5p	ENSG00000156802	ATAD2
ENSG00000261534.1	RP11-244O19.1	MIMAT0000433	hsa-miR-142-5p	ENSG00000135905	DOCK10
ENSG00000179818.12	PCBP1-AS1	MIMAT0000433	hsa-miR-142-5p	ENSG00000135720	DYNC1LI2
ENSG00000269937.1	RP11-20I23.8	MIMAT0000433	hsa-miR-142-5p	ENSG00000011426	ANLN
ENSG00000261534.1	RP11-244O19.1	MIMAT0000433	hsa-miR-142-5p	ENSG00000166851	PLK1
ENSG00000261534.1	RP11-244O19.1	MIMAT0000433	hsa-miR-142-5p	ENSG00000011426	ANLN
ENSG00000229956.8	ZRANB2-AS2	MIMAT0000433	hsa-miR-142-5p	ENSG00000146648	EGFR
ENSG00000179818.12	PCBP1-AS1	MIMAT0000433	hsa-miR-142-5p	ENSG00000011426	ANLN
ENSG00000229956.8	ZRANB2-AS2	MIMAT0000433	hsa-miR-142-5p	ENSG00000058804	NDC1
ENSG00000261534.1	RP11-244O19.1	MIMAT0000433	hsa-miR-142-5p	ENSG00000146648	EGFR
ENSG00000261534.1	RP11-244O19.1	MIMAT0000433	hsa-miR-142-5p	ENSG00000113448	PDE4D
ENSG00000229956.8	ZRANB2-AS2	MIMAT0000433	hsa-miR-142-5p	ENSG00000166851	PLK1
ENSG00000229956.8	ZRANB2-AS2	MIMAT0000433	hsa-miR-142-5p	ENSG00000125740	FOSB
ENSG00000234203.1	RP5-1050D4.2	MIMAT0000433	hsa-miR-142-5p	ENSG00000135720	DYNC1LI2
ENSG00000179818.12	PCBP1-AS1	MIMAT0000433	hsa-miR-142-5p	ENSG00000113448	PDE4D
ENSG00000261534.1	RP11-244O19.1	MIMAT0000433	hsa-miR-142-5p	ENSG00000107779	BMPR1A
ENSG00000234203.1	RP5-1050D4.2	MIMAT0000433	hsa-miR-142-5p	ENSG00000113448	PDE4D
ENSG00000261534.1	RP11-244O19.1	MIMAT0000433	hsa-miR-142-5p	ENSG00000156802	ATAD2
ENSG00000229956.8	ZRANB2-AS2	MIMAT0000433	hsa-miR-142-5p	ENSG00000116679	IVNS1ABP
ENSG00000269937.1	RP11-20I23.8	MIMAT0000433	hsa-miR-142-5p	ENSG00000163820	FYCO1
ENSG00000234203.1	RP5-1050D4.2	MIMAT0000433	hsa-miR-142-5p	ENSG00000146648	EGFR
ENSG00000269937.1	RP11-20I23.8	MIMAT0000433	hsa-miR-142-5p	ENSG00000146648	EGFR
ENSG00000261534.1	RP11-244O19.1	MIMAT0000433	hsa-miR-142-5p	ENSG00000116679	IVNS1ABP
ENSG00000234203.1	RP5-1050D4.2	MIMAT0000433	hsa-miR-142-5p	ENSG00000024526	DEPDC1
ENSG00000229956.8	ZRANB2-AS2	MIMAT0000433	hsa-miR-142-5p	ENSG00000160199	PKNOX1
ENSG00000229589.1	ACVR2B-AS1	MIMAT0000435	hsa-miR-143-3p	ENSG00000104738	MCM4
ENSG00000272502.1	RP11-713M15.2	MIMAT0000435	hsa-miR-143-3p	ENSG00000104738	MCM4
ENSG00000229589.1	ACVR2B-AS1	MIMAT0000435	hsa-miR-143-3p	ENSG00000125740	FOSB
ENSG00000272502.1	RP11-713M15.2	MIMAT0000435	hsa-miR-143-3p	ENSG00000146648	EGFR
ENSG00000272502.1	RP11-713M15.2	MIMAT0000435	hsa-miR-143-3p	ENSG00000105576	TNPO2
ENSG00000229589.1	ACVR2B-AS1	MIMAT0000435	hsa-miR-143-3p	ENSG00000135905	DOCK10
ENSG00000229589.1	ACVR2B-AS1	MIMAT0000435	hsa-miR-143-3p	ENSG00000119969	HELLS
ENSG00000229589.1	ACVR2B-AS1	MIMAT0000435	hsa-miR-143-3p	ENSG00000107779	BMPR1A
ENSG00000229589.1	ACVR2B-AS1	MIMAT0000435	hsa-miR-143-3p	ENSG00000154096	THY1
ENSG00000229589.1	ACVR2B-AS1	MIMAT0000435	hsa-miR-143-3p	ENSG00000163820	FYCO1
ENSG00000229589.1	ACVR2B-AS1	MIMAT0000435	hsa-miR-143-3p	ENSG00000135365	PHF21A
ENSG00000272502.1	RP11-713M15.2	MIMAT0000435	hsa-miR-143-3p	ENSG00000012048	BRCA1
ENSG00000229589.1	ACVR2B-AS1	MIMAT0000435	hsa-miR-143-3p	ENSG00000158769	F11R
ENSG00000229589.1	ACVR2B-AS1	MIMAT0000435	hsa-miR-143-3p	ENSG00000172575	RASGRP1
ENSG00000272502.1	RP11-713M15.2	MIMAT0000435	hsa-miR-143-3p	ENSG00000264364	DYNLL2
ENSG00000272502.1	RP11-713M15.2	MIMAT0000435	hsa-miR-143-3p	ENSG00000134874	DZIP1
ENSG00000272502.1	RP11-713M15.2	MIMAT0000435	hsa-miR-143-3p	ENSG00000135905	DOCK10
ENSG00000272502.1	RP11-713M15.2	MIMAT0000435	hsa-miR-143-3p	ENSG00000151503	NCAPD3
ENSG00000229589.1	ACVR2B-AS1	MIMAT0000435	hsa-miR-143-3p	ENSG00000154920	EME1
ENSG00000229589.1	ACVR2B-AS1	MIMAT0000435	hsa-miR-143-3p	ENSG00000134874	DZIP1
ENSG00000229589.1	ACVR2B-AS1	MIMAT0000435	hsa-miR-143-3p	ENSG00000166086	JAM3
ENSG00000229589.1	ACVR2B-AS1	MIMAT0000435	hsa-miR-143-3p	ENSG00000090889	KIF4A
ENSG00000272502.1	RP11-713M15.2	MIMAT0000435	hsa-miR-143-3p	ENSG00000163820	FYCO1
ENSG00000229589.1	ACVR2B-AS1	MIMAT0000435	hsa-miR-143-3p	ENSG00000151503	NCAPD3
ENSG00000272502.1	RP11-713M15.2	MIMAT0000435	hsa-miR-143-3p	ENSG00000171848	RRM2
ENSG00000272502.1	RP11-713M15.2	MIMAT0000435	hsa-miR-143-3p	ENSG00000154096	THY1
ENSG00000272502.1	RP11-713M15.2	MIMAT0000435	hsa-miR-143-3p	ENSG00000166086	JAM3
ENSG00000229589.1	ACVR2B-AS1	MIMAT0000435	hsa-miR-143-3p	ENSG00000186187	ZNRF1
ENSG00000272502.1	RP11-713M15.2	MIMAT0000435	hsa-miR-143-3p	ENSG00000119969	HELLS
ENSG00000272502.1	RP11-713M15.2	MIMAT0000435	hsa-miR-143-3p	ENSG00000172081	MOB3A
ENSG00000272502.1	RP11-713M15.2	MIMAT0000435	hsa-miR-143-3p	ENSG00000154920	EME1
ENSG00000229589.1	ACVR2B-AS1	MIMAT0000435	hsa-miR-143-3p	ENSG00000172081	MOB3A
ENSG00000229589.1	ACVR2B-AS1	MIMAT0000435	hsa-miR-143-3p	ENSG00000105576	TNPO2
ENSG00000272502.1	RP11-713M15.2	MIMAT0000435	hsa-miR-143-3p	ENSG00000135365	PHF21A
ENSG00000229589.1	ACVR2B-AS1	MIMAT0000435	hsa-miR-143-3p	ENSG00000012048	BRCA1
ENSG00000272502.1	RP11-713M15.2	MIMAT0000435	hsa-miR-143-3p	ENSG00000109586	GALNT7
ENSG00000272502.1	RP11-713M15.2	MIMAT0000435	hsa-miR-143-3p	ENSG00000172575	RASGRP1
ENSG00000229589.1	ACVR2B-AS1	MIMAT0000435	hsa-miR-143-3p	ENSG00000171848	RRM2
ENSG00000229589.1	ACVR2B-AS1	MIMAT0000435	hsa-miR-143-3p	ENSG00000109586	GALNT7
ENSG00000272502.1	RP11-713M15.2	MIMAT0000435	hsa-miR-143-3p	ENSG00000158769	F11R
ENSG00000272502.1	RP11-713M15.2	MIMAT0000435	hsa-miR-143-3p	ENSG00000186187	ZNRF1
ENSG00000272502.1	RP11-713M15.2	MIMAT0000435	hsa-miR-143-3p	ENSG00000125740	FOSB
ENSG00000272502.1	RP11-713M15.2	MIMAT0000435	hsa-miR-143-3p	ENSG00000090889	KIF4A
ENSG00000229589.1	ACVR2B-AS1	MIMAT0000435	hsa-miR-143-3p	ENSG00000146648	EGFR
ENSG00000272502.1	RP11-713M15.2	MIMAT0000435	hsa-miR-143-3p	ENSG00000107779	BMPR1A
ENSG00000229589.1	ACVR2B-AS1	MIMAT0000435	hsa-miR-143-3p	ENSG00000264364	DYNLL2
ENSG00000251301.5	RP11-81H14.2	MIMAT0004600	hsa-miR-144-5p	ENSG00000152601	MBNL1
ENSG00000235726.4	AC010148.1	MIMAT0000437	hsa-miR-145-5p	ENSG00000105976	MET
ENSG00000226711.5	FAM66C	MIMAT0000437	hsa-miR-145-5p	ENSG00000154721	JAM2
ENSG00000235726.4	AC010148.1	MIMAT0000437	hsa-miR-145-5p	ENSG00000146648	EGFR
ENSG00000235726.4	AC010148.1	MIMAT0000437	hsa-miR-145-5p	ENSG00000113448	PDE4D
ENSG00000235726.4	AC010148.1	MIMAT0000437	hsa-miR-145-5p	ENSG00000110917	MLEC
ENSG00000235726.4	AC010148.1	MIMAT0000437	hsa-miR-145-5p	ENSG00000104067	TJP1
ENSG00000235726.4	AC010148.1	MIMAT0000437	hsa-miR-145-5p	ENSG00000153214	TMEM87B
ENSG00000235726.4	AC010148.1	MIMAT0000437	hsa-miR-145-5p	ENSG00000264364	DYNLL2
ENSG00000235726.4	AC010148.1	MIMAT0000437	hsa-miR-145-5p	ENSG00000152601	MBNL1
ENSG00000235726.4	AC010148.1	MIMAT0000437	hsa-miR-145-5p	ENSG00000154721	JAM2
ENSG00000235726.4	AC010148.1	MIMAT0000437	hsa-miR-145-5p	ENSG00000105576	TNPO2
ENSG00000235726.4	AC010148.1	MIMAT0000437	hsa-miR-145-5p	ENSG00000276043	UHRF1
ENSG00000226711.5	FAM66C	MIMAT0000437	hsa-miR-145-5p	ENSG00000153044	CENPH
ENSG00000235726.4	AC010148.1	MIMAT0000437	hsa-miR-145-5p	ENSG00000116679	IVNS1ABP
ENSG00000226711.5	FAM66C	MIMAT0000437	hsa-miR-145-5p	ENSG00000113448	PDE4D
ENSG00000225783.5	MIAT	MIMAT0000437	hsa-miR-145-5p	ENSG00000264364	DYNLL2
ENSG00000225783.5	MIAT	MIMAT0000437	hsa-miR-145-5p	ENSG00000105576	TNPO2
ENSG00000235726.4	AC010148.1	MIMAT0000437	hsa-miR-145-5p	ENSG00000102181	CD99L2
ENSG00000235726.4	AC010148.1	MIMAT0000437	hsa-miR-145-5p	ENSG00000153044	CENPH
ENSG00000225783.5	MIAT	MIMAT0000437	hsa-miR-145-5p	ENSG00000105976	MET
ENSG00000235726.4	AC010148.1	MIMAT0000437	hsa-miR-145-5p	ENSG00000163820	FYCO1
ENSG00000235726.4	AC010148.1	MIMAT0000437	hsa-miR-145-5p	ENSG00000105281	SLC1A5
ENSG00000235726.4	AC010148.1	MIMAT0000437	hsa-miR-145-5p	ENSG00000158769	F11R
ENSG00000226711.5	FAM66C	MIMAT0000437	hsa-miR-145-5p	ENSG00000119969	HELLS
ENSG00000235726.4	AC010148.1	MIMAT0000437	hsa-miR-145-5p	ENSG00000104783	KCNN4
ENSG00000226711.5	FAM66C	MIMAT0000437	hsa-miR-145-5p	ENSG00000152689	RASGRP3
ENSG00000226711.5	FAM66C	MIMAT0000437	hsa-miR-145-5p	ENSG00000110917	MLEC
ENSG00000225783.5	MIAT	MIMAT0000437	hsa-miR-145-5p	ENSG00000152601	MBNL1
ENSG00000225783.5	MIAT	MIMAT0000437	hsa-miR-145-5p	ENSG00000146648	EGFR
ENSG00000225783.5	MIAT	MIMAT0000437	hsa-miR-145-5p	ENSG00000152689	RASGRP3
ENSG00000235726.4	AC010148.1	MIMAT0000437	hsa-miR-145-5p	ENSG00000152689	RASGRP3
ENSG00000226711.5	FAM66C	MIMAT0000437	hsa-miR-145-5p	ENSG00000153214	TMEM87B
ENSG00000225783.5	MIAT	MIMAT0000437	hsa-miR-145-5p	ENSG00000143924	EML4
ENSG00000235726.4	AC010148.1	MIMAT0000437	hsa-miR-145-5p	ENSG00000143924	EML4
ENSG00000226711.5	FAM66C	MIMAT0000437	hsa-miR-145-5p	ENSG00000152601	MBNL1
ENSG00000226711.5	FAM66C	MIMAT0000437	hsa-miR-145-5p	ENSG00000104783	KCNN4
ENSG00000226711.5	FAM66C	MIMAT0000437	hsa-miR-145-5p	ENSG00000104067	TJP1
ENSG00000226711.5	FAM66C	MIMAT0000437	hsa-miR-145-5p	ENSG00000146648	EGFR
ENSG00000226711.5	FAM66C	MIMAT0000437	hsa-miR-145-5p	ENSG00000102181	CD99L2
ENSG00000226711.5	FAM66C	MIMAT0000437	hsa-miR-145-5p	ENSG00000276043	UHRF1
ENSG00000226711.5	FAM66C	MIMAT0000437	hsa-miR-145-5p	ENSG00000158769	F11R
ENSG00000225783.5	MIAT	MIMAT0000437	hsa-miR-145-5p	ENSG00000163820	FYCO1
ENSG00000225783.5	MIAT	MIMAT0000437	hsa-miR-145-5p	ENSG00000105281	SLC1A5
ENSG00000226711.5	FAM66C	MIMAT0000437	hsa-miR-145-5p	ENSG00000105976	MET
ENSG00000225783.5	MIAT	MIMAT0000437	hsa-miR-145-5p	ENSG00000104783	KCNN4
ENSG00000226711.5	FAM66C	MIMAT0000437	hsa-miR-145-5p	ENSG00000105281	SLC1A5
ENSG00000225783.5	MIAT	MIMAT0000437	hsa-miR-145-5p	ENSG00000104067	TJP1
ENSG00000226711.5	FAM66C	MIMAT0000437	hsa-miR-145-5p	ENSG00000051180	RAD51
ENSG00000225783.5	MIAT	MIMAT0000437	hsa-miR-145-5p	ENSG00000113448	PDE4D
ENSG00000225783.5	MIAT	MIMAT0000437	hsa-miR-145-5p	ENSG00000154096	THY1
ENSG00000235726.4	AC010148.1	MIMAT0000437	hsa-miR-145-5p	ENSG00000119969	HELLS
ENSG00000235726.4	AC010148.1	MIMAT0000437	hsa-miR-145-5p	ENSG00000051180	RAD51
ENSG00000235726.4	AC010148.1	MIMAT0000437	hsa-miR-145-5p	ENSG00000154096	THY1
ENSG00000226711.5	FAM66C	MIMAT0000437	hsa-miR-145-5p	ENSG00000116679	IVNS1ABP
ENSG00000225783.5	MIAT	MIMAT0000437	hsa-miR-145-5p	ENSG00000116679	IVNS1ABP
ENSG00000226711.5	FAM66C	MIMAT0000437	hsa-miR-145-5p	ENSG00000163820	FYCO1
ENSG00000225783.5	MIAT	MIMAT0000437	hsa-miR-145-5p	ENSG00000102181	CD99L2
ENSG00000225783.5	MIAT	MIMAT0000437	hsa-miR-145-5p	ENSG00000110917	MLEC
ENSG00000225783.5	MIAT	MIMAT0000437	hsa-miR-145-5p	ENSG00000154721	JAM2
ENSG00000226711.5	FAM66C	MIMAT0000437	hsa-miR-145-5p	ENSG00000143924	EML4
ENSG00000226711.5	FAM66C	MIMAT0000437	hsa-miR-145-5p	ENSG00000154096	THY1
ENSG00000225783.5	MIAT	MIMAT0000437	hsa-miR-145-5p	ENSG00000051180	RAD51
ENSG00000226711.5	FAM66C	MIMAT0000437	hsa-miR-145-5p	ENSG00000105576	TNPO2
ENSG00000225783.5	MIAT	MIMAT0000437	hsa-miR-145-5p	ENSG00000276043	UHRF1
ENSG00000225783.5	MIAT	MIMAT0000437	hsa-miR-145-5p	ENSG00000153044	CENPH
ENSG00000225783.5	MIAT	MIMAT0000437	hsa-miR-145-5p	ENSG00000119969	HELLS
ENSG00000225783.5	MIAT	MIMAT0000437	hsa-miR-145-5p	ENSG00000153214	TMEM87B
ENSG00000225783.5	MIAT	MIMAT0000437	hsa-miR-145-5p	ENSG00000158769	F11R
ENSG00000226711.5	FAM66C	MIMAT0000437	hsa-miR-145-5p	ENSG00000264364	DYNLL2
ENSG00000267383.5	CTC-260E6.6	MIMAT0000449	hsa-miR-146a-5p	ENSG00000176986	SEC24C
ENSG00000229334.1	AC046143.3	MIMAT0000449	hsa-miR-146a-5p	ENSG00000186187	ZNRF1
ENSG00000267383.5	CTC-260E6.6	MIMAT0000449	hsa-miR-146a-5p	ENSG00000177606	JUN
ENSG00000267383.5	CTC-260E6.6	MIMAT0000449	hsa-miR-146a-5p	ENSG00000143924	EML4
ENSG00000267383.5	CTC-260E6.6	MIMAT0000449	hsa-miR-146a-5p	ENSG00000024526	DEPDC1
ENSG00000267383.5	CTC-260E6.6	MIMAT0000449	hsa-miR-146a-5p	ENSG00000090889	KIF4A
ENSG00000229334.1	AC046143.3	MIMAT0000449	hsa-miR-146a-5p	ENSG00000163739	CXCL1
ENSG00000229334.1	AC046143.3	MIMAT0000449	hsa-miR-146a-5p	ENSG00000051180	RAD51
ENSG00000267383.5	CTC-260E6.6	MIMAT0000449	hsa-miR-146a-5p	ENSG00000110917	MLEC
ENSG00000267383.5	CTC-260E6.6	MIMAT0000449	hsa-miR-146a-5p	ENSG00000051180	RAD51
ENSG00000229334.1	AC046143.3	MIMAT0000449	hsa-miR-146a-5p	ENSG00000160199	PKNOX1
ENSG00000267383.5	CTC-260E6.6	MIMAT0000449	hsa-miR-146a-5p	ENSG00000186187	ZNRF1
ENSG00000229334.1	AC046143.3	MIMAT0000449	hsa-miR-146a-5p	ENSG00000264364	DYNLL2
ENSG00000267383.5	CTC-260E6.6	MIMAT0000449	hsa-miR-146a-5p	ENSG00000163739	CXCL1
ENSG00000267383.5	CTC-260E6.6	MIMAT0000449	hsa-miR-146a-5p	ENSG00000006062	MAP3K14
ENSG00000229334.1	AC046143.3	MIMAT0000449	hsa-miR-146a-5p	ENSG00000115415	STAT1
ENSG00000229334.1	AC046143.3	MIMAT0000449	hsa-miR-146a-5p	ENSG00000143924	EML4
ENSG00000267383.5	CTC-260E6.6	MIMAT0000449	hsa-miR-146a-5p	ENSG00000264364	DYNLL2
ENSG00000229334.1	AC046143.3	MIMAT0000449	hsa-miR-146a-5p	ENSG00000176986	SEC24C
ENSG00000229334.1	AC046143.3	MIMAT0000449	hsa-miR-146a-5p	ENSG00000110917	MLEC
ENSG00000267383.5	CTC-260E6.6	MIMAT0000449	hsa-miR-146a-5p	ENSG00000172575	RASGRP1
ENSG00000267383.5	CTC-260E6.6	MIMAT0000449	hsa-miR-146a-5p	ENSG00000160199	PKNOX1
ENSG00000267383.5	CTC-260E6.6	MIMAT0000449	hsa-miR-146a-5p	ENSG00000012048	BRCA1
ENSG00000267383.5	CTC-260E6.6	MIMAT0000449	hsa-miR-146a-5p	ENSG00000115415	STAT1
ENSG00000229334.1	AC046143.3	MIMAT0000449	hsa-miR-146a-5p	ENSG00000172575	RASGRP1
ENSG00000267383.5	CTC-260E6.6	MIMAT0000449	hsa-miR-146a-5p	ENSG00000153214	TMEM87B
ENSG00000229334.1	AC046143.3	MIMAT0000449	hsa-miR-146a-5p	ENSG00000146648	EGFR
ENSG00000267383.5	CTC-260E6.6	MIMAT0000449	hsa-miR-146a-5p	ENSG00000110719	TCIRG1
ENSG00000229334.1	AC046143.3	MIMAT0000449	hsa-miR-146a-5p	ENSG00000012048	BRCA1
ENSG00000229334.1	AC046143.3	MIMAT0000449	hsa-miR-146a-5p	ENSG00000153214	TMEM87B
ENSG00000229334.1	AC046143.3	MIMAT0000449	hsa-miR-146a-5p	ENSG00000024526	DEPDC1
ENSG00000229334.1	AC046143.3	MIMAT0000449	hsa-miR-146a-5p	ENSG00000140451	PIF1
ENSG00000267383.5	CTC-260E6.6	MIMAT0000449	hsa-miR-146a-5p	ENSG00000166086	JAM3
ENSG00000229334.1	AC046143.3	MIMAT0000449	hsa-miR-146a-5p	ENSG00000177606	JUN
ENSG00000229334.1	AC046143.3	MIMAT0000449	hsa-miR-146a-5p	ENSG00000105281	SLC1A5
ENSG00000267383.5	CTC-260E6.6	MIMAT0000449	hsa-miR-146a-5p	ENSG00000140451	PIF1
ENSG00000229334.1	AC046143.3	MIMAT0000449	hsa-miR-146a-5p	ENSG00000110719	TCIRG1
ENSG00000267383.5	CTC-260E6.6	MIMAT0000449	hsa-miR-146a-5p	ENSG00000105281	SLC1A5
ENSG00000267383.5	CTC-260E6.6	MIMAT0000449	hsa-miR-146a-5p	ENSG00000146648	EGFR
ENSG00000229334.1	AC046143.3	MIMAT0000449	hsa-miR-146a-5p	ENSG00000090889	KIF4A
ENSG00000229334.1	AC046143.3	MIMAT0000449	hsa-miR-146a-5p	ENSG00000006062	MAP3K14
ENSG00000229334.1	AC046143.3	MIMAT0000449	hsa-miR-146a-5p	ENSG00000166086	JAM3
ENSG00000249684.4	RP11-423H2.3	MIMAT0000243	hsa-miR-148a-3p	ENSG00000152601	MBNL1
ENSG00000249096.5	RP11-290F5.1	MIMAT0000243	hsa-miR-148a-3p	ENSG00000136040	PLXNC1
ENSG00000249096.5	RP11-290F5.1	MIMAT0000243	hsa-miR-148a-3p	ENSG00000152601	MBNL1
ENSG00000253174.2	RP11-360L9.7	MIMAT0000243	hsa-miR-148a-3p	ENSG00000276043	UHRF1
ENSG00000253174.2	RP11-360L9.7	MIMAT0000243	hsa-miR-148a-3p	ENSG00000115415	STAT1
ENSG00000253174.2	RP11-360L9.7	MIMAT0000243	hsa-miR-148a-3p	ENSG00000152601	MBNL1
ENSG00000253174.2	RP11-360L9.7	MIMAT0000243	hsa-miR-148a-3p	ENSG00000136040	PLXNC1
ENSG00000249684.4	RP11-423H2.3	MIMAT0000243	hsa-miR-148a-3p	ENSG00000125912	NCLN
ENSG00000253174.2	RP11-360L9.7	MIMAT0000243	hsa-miR-148a-3p	ENSG00000146648	EGFR
ENSG00000247624.5	CPEB2-AS1	MIMAT0000243	hsa-miR-148a-3p	ENSG00000172575	RASGRP1
ENSG00000249096.5	RP11-290F5.1	MIMAT0000243	hsa-miR-148a-3p	ENSG00000172575	RASGRP1
ENSG00000253174.2	RP11-360L9.7	MIMAT0000243	hsa-miR-148a-3p	ENSG00000125740	FOSB
ENSG00000253174.2	RP11-360L9.7	MIMAT0000243	hsa-miR-148a-3p	ENSG00000118513	MYB
ENSG00000247624.5	CPEB2-AS1	MIMAT0000243	hsa-miR-148a-3p	ENSG00000110917	MLEC
ENSG00000249684.4	RP11-423H2.3	MIMAT0000243	hsa-miR-148a-3p	ENSG00000276043	UHRF1
ENSG00000249096.5	RP11-290F5.1	MIMAT0000243	hsa-miR-148a-3p	ENSG00000118513	MYB
ENSG00000249096.5	RP11-290F5.1	MIMAT0000243	hsa-miR-148a-3p	ENSG00000125740	FOSB
ENSG00000253174.2	RP11-360L9.7	MIMAT0000243	hsa-miR-148a-3p	ENSG00000105576	TNPO2
ENSG00000247624.5	CPEB2-AS1	MIMAT0000243	hsa-miR-148a-3p	ENSG00000105576	TNPO2
ENSG00000247624.5	CPEB2-AS1	MIMAT0000243	hsa-miR-148a-3p	ENSG00000136040	PLXNC1
ENSG00000253174.2	RP11-360L9.7	MIMAT0000243	hsa-miR-148a-3p	ENSG00000163820	FYCO1
ENSG00000249684.4	RP11-423H2.3	MIMAT0000243	hsa-miR-148a-3p	ENSG00000102181	CD99L2
ENSG00000249684.4	RP11-423H2.3	MIMAT0000243	hsa-miR-148a-3p	ENSG00000118513	MYB
ENSG00000249096.5	RP11-290F5.1	MIMAT0000243	hsa-miR-148a-3p	ENSG00000113448	PDE4D
ENSG00000249684.4	RP11-423H2.3	MIMAT0000243	hsa-miR-148a-3p	ENSG00000115415	STAT1
ENSG00000247624.5	CPEB2-AS1	MIMAT0000243	hsa-miR-148a-3p	ENSG00000276043	UHRF1
ENSG00000249684.4	RP11-423H2.3	MIMAT0000243	hsa-miR-148a-3p	ENSG00000186642	PDE2A
ENSG00000247624.5	CPEB2-AS1	MIMAT0000243	hsa-miR-148a-3p	ENSG00000186187	ZNRF1
ENSG00000247624.5	CPEB2-AS1	MIMAT0000243	hsa-miR-148a-3p	ENSG00000163820	FYCO1
ENSG00000253174.2	RP11-360L9.7	MIMAT0000243	hsa-miR-148a-3p	ENSG00000102181	CD99L2
ENSG00000249684.4	RP11-423H2.3	MIMAT0000243	hsa-miR-148a-3p	ENSG00000186187	ZNRF1
ENSG00000253174.2	RP11-360L9.7	MIMAT0000243	hsa-miR-148a-3p	ENSG00000006062	MAP3K14
ENSG00000249684.4	RP11-423H2.3	MIMAT0000243	hsa-miR-148a-3p	ENSG00000146648	EGFR
ENSG00000249096.5	RP11-290F5.1	MIMAT0000243	hsa-miR-148a-3p	ENSG00000110917	MLEC
ENSG00000253174.2	RP11-360L9.7	MIMAT0000243	hsa-miR-148a-3p	ENSG00000166086	JAM3
ENSG00000253174.2	RP11-360L9.7	MIMAT0000243	hsa-miR-148a-3p	ENSG00000109586	GALNT7
ENSG00000249684.4	RP11-423H2.3	MIMAT0000243	hsa-miR-148a-3p	ENSG00000125740	FOSB
ENSG00000249684.4	RP11-423H2.3	MIMAT0000243	hsa-miR-148a-3p	ENSG00000136040	PLXNC1
ENSG00000247624.5	CPEB2-AS1	MIMAT0000243	hsa-miR-148a-3p	ENSG00000113448	PDE4D
ENSG00000247624.5	CPEB2-AS1	MIMAT0000243	hsa-miR-148a-3p	ENSG00000118513	MYB
ENSG00000247624.5	CPEB2-AS1	MIMAT0000243	hsa-miR-148a-3p	ENSG00000115415	STAT1
ENSG00000247624.5	CPEB2-AS1	MIMAT0000243	hsa-miR-148a-3p	ENSG00000125740	FOSB
ENSG00000253174.2	RP11-360L9.7	MIMAT0000243	hsa-miR-148a-3p	ENSG00000105976	MET
ENSG00000253174.2	RP11-360L9.7	MIMAT0000243	hsa-miR-148a-3p	ENSG00000186642	PDE2A
ENSG00000249684.4	RP11-423H2.3	MIMAT0000243	hsa-miR-148a-3p	ENSG00000264364	DYNLL2
ENSG00000249096.5	RP11-290F5.1	MIMAT0000243	hsa-miR-148a-3p	ENSG00000146648	EGFR
ENSG00000253174.2	RP11-360L9.7	MIMAT0000243	hsa-miR-148a-3p	ENSG00000125912	NCLN
ENSG00000249684.4	RP11-423H2.3	MIMAT0000243	hsa-miR-148a-3p	ENSG00000051180	RAD51
ENSG00000249684.4	RP11-423H2.3	MIMAT0000243	hsa-miR-148a-3p	ENSG00000105976	MET
ENSG00000249684.4	RP11-423H2.3	MIMAT0000243	hsa-miR-148a-3p	ENSG00000109586	GALNT7
ENSG00000249096.5	RP11-290F5.1	MIMAT0000243	hsa-miR-148a-3p	ENSG00000186642	PDE2A
ENSG00000247624.5	CPEB2-AS1	MIMAT0000243	hsa-miR-148a-3p	ENSG00000146648	EGFR
ENSG00000247624.5	CPEB2-AS1	MIMAT0000243	hsa-miR-148a-3p	ENSG00000105976	MET
ENSG00000249096.5	RP11-290F5.1	MIMAT0000243	hsa-miR-148a-3p	ENSG00000051180	RAD51
ENSG00000247624.5	CPEB2-AS1	MIMAT0000243	hsa-miR-148a-3p	ENSG00000152601	MBNL1
ENSG00000249684.4	RP11-423H2.3	MIMAT0000243	hsa-miR-148a-3p	ENSG00000006062	MAP3K14
ENSG00000249096.5	RP11-290F5.1	MIMAT0000243	hsa-miR-148a-3p	ENSG00000105576	TNPO2
ENSG00000249684.4	RP11-423H2.3	MIMAT0000243	hsa-miR-148a-3p	ENSG00000110917	MLEC
ENSG00000249684.4	RP11-423H2.3	MIMAT0000243	hsa-miR-148a-3p	ENSG00000113448	PDE4D
ENSG00000249096.5	RP11-290F5.1	MIMAT0000243	hsa-miR-148a-3p	ENSG00000006062	MAP3K14
ENSG00000249096.5	RP11-290F5.1	MIMAT0000243	hsa-miR-148a-3p	ENSG00000166086	JAM3
ENSG00000249096.5	RP11-290F5.1	MIMAT0000243	hsa-miR-148a-3p	ENSG00000125912	NCLN
ENSG00000253174.2	RP11-360L9.7	MIMAT0000243	hsa-miR-148a-3p	ENSG00000186187	ZNRF1
ENSG00000247624.5	CPEB2-AS1	MIMAT0000243	hsa-miR-148a-3p	ENSG00000051180	RAD51
ENSG00000247624.5	CPEB2-AS1	MIMAT0000243	hsa-miR-148a-3p	ENSG00000125912	NCLN
ENSG00000247624.5	CPEB2-AS1	MIMAT0000243	hsa-miR-148a-3p	ENSG00000264364	DYNLL2
ENSG00000253174.2	RP11-360L9.7	MIMAT0000243	hsa-miR-148a-3p	ENSG00000051180	RAD51
ENSG00000249096.5	RP11-290F5.1	MIMAT0000243	hsa-miR-148a-3p	ENSG00000163820	FYCO1
ENSG00000249096.5	RP11-290F5.1	MIMAT0000243	hsa-miR-148a-3p	ENSG00000276043	UHRF1
ENSG00000247624.5	CPEB2-AS1	MIMAT0000243	hsa-miR-148a-3p	ENSG00000166086	JAM3
ENSG00000253174.2	RP11-360L9.7	MIMAT0000243	hsa-miR-148a-3p	ENSG00000264364	DYNLL2
ENSG00000253174.2	RP11-360L9.7	MIMAT0000243	hsa-miR-148a-3p	ENSG00000110917	MLEC
ENSG00000249096.5	RP11-290F5.1	MIMAT0000243	hsa-miR-148a-3p	ENSG00000186187	ZNRF1
ENSG00000249684.4	RP11-423H2.3	MIMAT0000243	hsa-miR-148a-3p	ENSG00000172575	RASGRP1
ENSG00000249096.5	RP11-290F5.1	MIMAT0000243	hsa-miR-148a-3p	ENSG00000102181	CD99L2
ENSG00000253174.2	RP11-360L9.7	MIMAT0000243	hsa-miR-148a-3p	ENSG00000172575	RASGRP1
ENSG00000249684.4	RP11-423H2.3	MIMAT0000243	hsa-miR-148a-3p	ENSG00000163820	FYCO1
ENSG00000249684.4	RP11-423H2.3	MIMAT0000243	hsa-miR-148a-3p	ENSG00000166086	JAM3
ENSG00000247624.5	CPEB2-AS1	MIMAT0000243	hsa-miR-148a-3p	ENSG00000006062	MAP3K14
ENSG00000247624.5	CPEB2-AS1	MIMAT0000243	hsa-miR-148a-3p	ENSG00000109586	GALNT7
ENSG00000247624.5	CPEB2-AS1	MIMAT0000243	hsa-miR-148a-3p	ENSG00000102181	CD99L2
ENSG00000249096.5	RP11-290F5.1	MIMAT0000243	hsa-miR-148a-3p	ENSG00000264364	DYNLL2
ENSG00000247624.5	CPEB2-AS1	MIMAT0000243	hsa-miR-148a-3p	ENSG00000186642	PDE2A
ENSG00000249096.5	RP11-290F5.1	MIMAT0000243	hsa-miR-148a-3p	ENSG00000115415	STAT1
ENSG00000249096.5	RP11-290F5.1	MIMAT0000243	hsa-miR-148a-3p	ENSG00000109586	GALNT7
ENSG00000253174.2	RP11-360L9.7	MIMAT0000243	hsa-miR-148a-3p	ENSG00000113448	PDE4D
ENSG00000249684.4	RP11-423H2.3	MIMAT0000243	hsa-miR-148a-3p	ENSG00000105576	TNPO2
ENSG00000249096.5	RP11-290F5.1	MIMAT0000243	hsa-miR-148a-3p	ENSG00000105976	MET
ENSG00000234913.1	XXbac-B476C20.13	MIMAT0000450	hsa-miR-149-5p	ENSG00000090889	KIF4A
ENSG00000234913.1	XXbac-B476C20.13	MIMAT0000450	hsa-miR-149-5p	ENSG00000104067	TJP1
ENSG00000235366.2	LINC01055	MIMAT0000450	hsa-miR-149-5p	ENSG00000118513	MYB
ENSG00000234913.1	XXbac-B476C20.13	MIMAT0000450	hsa-miR-149-5p	ENSG00000118513	MYB
ENSG00000234913.1	XXbac-B476C20.13	MIMAT0000450	hsa-miR-149-5p	ENSG00000105976	MET
ENSG00000234913.1	XXbac-B476C20.13	MIMAT0000450	hsa-miR-149-5p	ENSG00000012048	BRCA1
ENSG00000234913.1	XXbac-B476C20.13	MIMAT0000450	hsa-miR-149-5p	ENSG00000177606	JUN
ENSG00000234913.1	XXbac-B476C20.13	MIMAT0000450	hsa-miR-149-5p	ENSG00000172081	MOB3A
ENSG00000235366.2	LINC01055	MIMAT0000450	hsa-miR-149-5p	ENSG00000264364	DYNLL2
ENSG00000235366.2	LINC01055	MIMAT0000450	hsa-miR-149-5p	ENSG00000115415	STAT1
ENSG00000235366.2	LINC01055	MIMAT0000450	hsa-miR-149-5p	ENSG00000154096	THY1
ENSG00000234913.1	XXbac-B476C20.13	MIMAT0000450	hsa-miR-149-5p	ENSG00000163820	FYCO1
ENSG00000235366.2	LINC01055	MIMAT0000450	hsa-miR-149-5p	ENSG00000177606	JUN
ENSG00000234913.1	XXbac-B476C20.13	MIMAT0000450	hsa-miR-149-5p	ENSG00000135905	DOCK10
ENSG00000234913.1	XXbac-B476C20.13	MIMAT0000450	hsa-miR-149-5p	ENSG00000163808	KIF15
ENSG00000235366.2	LINC01055	MIMAT0000450	hsa-miR-149-5p	ENSG00000102181	CD99L2
ENSG00000234913.1	XXbac-B476C20.13	MIMAT0000450	hsa-miR-149-5p	ENSG00000186187	ZNRF1
ENSG00000234913.1	XXbac-B476C20.13	MIMAT0000450	hsa-miR-149-5p	ENSG00000109586	GALNT7
ENSG00000235366.2	LINC01055	MIMAT0000450	hsa-miR-149-5p	ENSG00000075702	WDR62
ENSG00000234913.1	XXbac-B476C20.13	MIMAT0000450	hsa-miR-149-5p	ENSG00000171848	RRM2
ENSG00000234913.1	XXbac-B476C20.13	MIMAT0000450	hsa-miR-149-5p	ENSG00000186642	PDE2A
ENSG00000234913.1	XXbac-B476C20.13	MIMAT0000450	hsa-miR-149-5p	ENSG00000154096	THY1
ENSG00000235366.2	LINC01055	MIMAT0000450	hsa-miR-149-5p	ENSG00000119969	HELLS
ENSG00000235366.2	LINC01055	MIMAT0000450	hsa-miR-149-5p	ENSG00000172081	MOB3A
ENSG00000235366.2	LINC01055	MIMAT0000450	hsa-miR-149-5p	ENSG00000156802	ATAD2
ENSG00000234913.1	XXbac-B476C20.13	MIMAT0000450	hsa-miR-149-5p	ENSG00000264364	DYNLL2
ENSG00000234913.1	XXbac-B476C20.13	MIMAT0000450	hsa-miR-149-5p	ENSG00000129173	E2F8
ENSG00000235366.2	LINC01055	MIMAT0000450	hsa-miR-149-5p	ENSG00000110917	MLEC
ENSG00000234913.1	XXbac-B476C20.13	MIMAT0000450	hsa-miR-149-5p	ENSG00000006062	MAP3K14
ENSG00000234913.1	XXbac-B476C20.13	MIMAT0000450	hsa-miR-149-5p	ENSG00000102181	CD99L2
ENSG00000234913.1	XXbac-B476C20.13	MIMAT0000450	hsa-miR-149-5p	ENSG00000156802	ATAD2
ENSG00000234913.1	XXbac-B476C20.13	MIMAT0000450	hsa-miR-149-5p	ENSG00000113448	PDE4D
ENSG00000234913.1	XXbac-B476C20.13	MIMAT0000450	hsa-miR-149-5p	ENSG00000115415	STAT1
ENSG00000235366.2	LINC01055	MIMAT0000450	hsa-miR-149-5p	ENSG00000135905	DOCK10
ENSG00000235366.2	LINC01055	MIMAT0000450	hsa-miR-149-5p	ENSG00000105281	SLC1A5
ENSG00000235366.2	LINC01055	MIMAT0000450	hsa-miR-149-5p	ENSG00000135720	DYNC1LI2
ENSG00000235366.2	LINC01055	MIMAT0000450	hsa-miR-149-5p	ENSG00000134874	DZIP1
ENSG00000235366.2	LINC01055	MIMAT0000450	hsa-miR-149-5p	ENSG00000158769	F11R
ENSG00000235366.2	LINC01055	MIMAT0000450	hsa-miR-149-5p	ENSG00000090889	KIF4A
ENSG00000234913.1	XXbac-B476C20.13	MIMAT0000450	hsa-miR-149-5p	ENSG00000169429	CXCL8
ENSG00000235366.2	LINC01055	MIMAT0000450	hsa-miR-149-5p	ENSG00000186187	ZNRF1
ENSG00000235366.2	LINC01055	MIMAT0000450	hsa-miR-149-5p	ENSG00000154920	EME1
ENSG00000234913.1	XXbac-B476C20.13	MIMAT0000450	hsa-miR-149-5p	ENSG00000125912	NCLN
ENSG00000234913.1	XXbac-B476C20.13	MIMAT0000450	hsa-miR-149-5p	ENSG00000134874	DZIP1
ENSG00000234913.1	XXbac-B476C20.13	MIMAT0000450	hsa-miR-149-5p	ENSG00000135365	PHF21A
ENSG00000235366.2	LINC01055	MIMAT0000450	hsa-miR-149-5p	ENSG00000058804	NDC1
ENSG00000235366.2	LINC01055	MIMAT0000450	hsa-miR-149-5p	ENSG00000171848	RRM2
ENSG00000234913.1	XXbac-B476C20.13	MIMAT0000450	hsa-miR-149-5p	ENSG00000105281	SLC1A5
ENSG00000235366.2	LINC01055	MIMAT0000450	hsa-miR-149-5p	ENSG00000163808	KIF15
ENSG00000235366.2	LINC01055	MIMAT0000450	hsa-miR-149-5p	ENSG00000105976	MET
ENSG00000235366.2	LINC01055	MIMAT0000450	hsa-miR-149-5p	ENSG00000104067	TJP1
ENSG00000234913.1	XXbac-B476C20.13	MIMAT0000450	hsa-miR-149-5p	ENSG00000154920	EME1
ENSG00000235366.2	LINC01055	MIMAT0000450	hsa-miR-149-5p	ENSG00000176986	SEC24C
ENSG00000234913.1	XXbac-B476C20.13	MIMAT0000450	hsa-miR-149-5p	ENSG00000158769	F11R
ENSG00000234913.1	XXbac-B476C20.13	MIMAT0000450	hsa-miR-149-5p	ENSG00000146648	EGFR
ENSG00000234913.1	XXbac-B476C20.13	MIMAT0000450	hsa-miR-149-5p	ENSG00000176986	SEC24C
ENSG00000235366.2	LINC01055	MIMAT0000450	hsa-miR-149-5p	ENSG00000006062	MAP3K14
ENSG00000235366.2	LINC01055	MIMAT0000450	hsa-miR-149-5p	ENSG00000100906	NFKBIA
ENSG00000235366.2	LINC01055	MIMAT0000450	hsa-miR-149-5p	ENSG00000135365	PHF21A
ENSG00000235366.2	LINC01055	MIMAT0000450	hsa-miR-149-5p	ENSG00000146648	EGFR
ENSG00000235366.2	LINC01055	MIMAT0000450	hsa-miR-149-5p	ENSG00000113448	PDE4D
ENSG00000235366.2	LINC01055	MIMAT0000450	hsa-miR-149-5p	ENSG00000169429	CXCL8
ENSG00000234913.1	XXbac-B476C20.13	MIMAT0000450	hsa-miR-149-5p	ENSG00000075702	WDR62
ENSG00000235366.2	LINC01055	MIMAT0000450	hsa-miR-149-5p	ENSG00000125912	NCLN
ENSG00000234913.1	XXbac-B476C20.13	MIMAT0000450	hsa-miR-149-5p	ENSG00000058804	NDC1
ENSG00000235366.2	LINC01055	MIMAT0000450	hsa-miR-149-5p	ENSG00000163820	FYCO1
ENSG00000234913.1	XXbac-B476C20.13	MIMAT0000450	hsa-miR-149-5p	ENSG00000110917	MLEC
ENSG00000234913.1	XXbac-B476C20.13	MIMAT0000450	hsa-miR-149-5p	ENSG00000119969	HELLS
ENSG00000235366.2	LINC01055	MIMAT0000450	hsa-miR-149-5p	ENSG00000012048	BRCA1
ENSG00000235366.2	LINC01055	MIMAT0000450	hsa-miR-149-5p	ENSG00000109586	GALNT7
ENSG00000235366.2	LINC01055	MIMAT0000450	hsa-miR-149-5p	ENSG00000129173	E2F8
ENSG00000234913.1	XXbac-B476C20.13	MIMAT0000450	hsa-miR-149-5p	ENSG00000135720	DYNC1LI2
ENSG00000234913.1	XXbac-B476C20.13	MIMAT0000450	hsa-miR-149-5p	ENSG00000100906	NFKBIA
ENSG00000235366.2	LINC01055	MIMAT0000450	hsa-miR-149-5p	ENSG00000186642	PDE2A
ENSG00000279712.1	CTA-280A3.2	MIMAT0000451	hsa-miR-150-5p	ENSG00000104783	KCNN4
ENSG00000180422.3	LINC00304	MIMAT0000451	hsa-miR-150-5p	ENSG00000100554	ATP6V1D
ENSG00000239322.1	ATP6V1B1-AS1	MIMAT0000451	hsa-miR-150-5p	ENSG00000153214	TMEM87B
ENSG00000279712.1	CTA-280A3.2	MIMAT0000451	hsa-miR-150-5p	ENSG00000051180	RAD51
ENSG00000279712.1	CTA-280A3.2	MIMAT0000451	hsa-miR-150-5p	ENSG00000113448	PDE4D
ENSG00000206567.8	AC022007.5	MIMAT0000451	hsa-miR-150-5p	ENSG00000104783	KCNN4
ENSG00000279712.1	CTA-280A3.2	MIMAT0000451	hsa-miR-150-5p	ENSG00000115415	STAT1
ENSG00000206567.8	AC022007.5	MIMAT0000451	hsa-miR-150-5p	ENSG00000012048	BRCA1
ENSG00000180422.3	LINC00304	MIMAT0000451	hsa-miR-150-5p	ENSG00000104738	MCM4
ENSG00000236790.4	LINC00299	MIMAT0000451	hsa-miR-150-5p	ENSG00000110917	MLEC
ENSG00000180422.3	LINC00304	MIMAT0000451	hsa-miR-150-5p	ENSG00000090889	KIF4A
ENSG00000239322.1	ATP6V1B1-AS1	MIMAT0000451	hsa-miR-150-5p	ENSG00000152601	MBNL1
ENSG00000279712.1	CTA-280A3.2	MIMAT0000451	hsa-miR-150-5p	ENSG00000058804	NDC1
ENSG00000261064.1	RP11-1000B6.3	MIMAT0000451	hsa-miR-150-5p	ENSG00000154096	THY1
ENSG00000279712.1	CTA-280A3.2	MIMAT0000451	hsa-miR-150-5p	ENSG00000100554	ATP6V1D
ENSG00000279712.1	CTA-280A3.2	MIMAT0000451	hsa-miR-150-5p	ENSG00000123358	NR4A1
ENSG00000180422.3	LINC00304	MIMAT0000451	hsa-miR-150-5p	ENSG00000115415	STAT1
ENSG00000279712.1	CTA-280A3.2	MIMAT0000451	hsa-miR-150-5p	ENSG00000118513	MYB
ENSG00000236790.4	LINC00299	MIMAT0000451	hsa-miR-150-5p	ENSG00000125912	NCLN
ENSG00000239322.1	ATP6V1B1-AS1	MIMAT0000451	hsa-miR-150-5p	ENSG00000171848	RRM2
ENSG00000180422.3	LINC00304	MIMAT0000451	hsa-miR-150-5p	ENSG00000172081	MOB3A
ENSG00000206567.8	AC022007.5	MIMAT0000451	hsa-miR-150-5p	ENSG00000186187	ZNRF1
ENSG00000239322.1	ATP6V1B1-AS1	MIMAT0000451	hsa-miR-150-5p	ENSG00000186187	ZNRF1
ENSG00000261064.1	RP11-1000B6.3	MIMAT0000451	hsa-miR-150-5p	ENSG00000111653	ING4
ENSG00000206567.8	AC022007.5	MIMAT0000451	hsa-miR-150-5p	ENSG00000006062	MAP3K14
ENSG00000180422.3	LINC00304	MIMAT0000451	hsa-miR-150-5p	ENSG00000125912	NCLN
ENSG00000279712.1	CTA-280A3.2	MIMAT0000451	hsa-miR-150-5p	ENSG00000172081	MOB3A
ENSG00000279712.1	CTA-280A3.2	MIMAT0000451	hsa-miR-150-5p	ENSG00000135720	DYNC1LI2
ENSG00000239322.1	ATP6V1B1-AS1	MIMAT0000451	hsa-miR-150-5p	ENSG00000172081	MOB3A
ENSG00000236790.4	LINC00299	MIMAT0000451	hsa-miR-150-5p	ENSG00000186187	ZNRF1
ENSG00000180422.3	LINC00304	MIMAT0000451	hsa-miR-150-5p	ENSG00000264364	DYNLL2
ENSG00000236790.4	LINC00299	MIMAT0000451	hsa-miR-150-5p	ENSG00000058804	NDC1
ENSG00000180422.3	LINC00304	MIMAT0000451	hsa-miR-150-5p	ENSG00000111653	ING4
ENSG00000206567.8	AC022007.5	MIMAT0000451	hsa-miR-150-5p	ENSG00000090889	KIF4A
ENSG00000239322.1	ATP6V1B1-AS1	MIMAT0000451	hsa-miR-150-5p	ENSG00000104783	KCNN4
ENSG00000206567.8	AC022007.5	MIMAT0000451	hsa-miR-150-5p	ENSG00000113448	PDE4D
ENSG00000180422.3	LINC00304	MIMAT0000451	hsa-miR-150-5p	ENSG00000186642	PDE2A
ENSG00000279712.1	CTA-280A3.2	MIMAT0000451	hsa-miR-150-5p	ENSG00000012048	BRCA1
ENSG00000261064.1	RP11-1000B6.3	MIMAT0000451	hsa-miR-150-5p	ENSG00000153214	TMEM87B
ENSG00000180422.3	LINC00304	MIMAT0000451	hsa-miR-150-5p	ENSG00000051180	RAD51
ENSG00000261064.1	RP11-1000B6.3	MIMAT0000451	hsa-miR-150-5p	ENSG00000012048	BRCA1
ENSG00000236790.4	LINC00299	MIMAT0000451	hsa-miR-150-5p	ENSG00000154096	THY1
ENSG00000180422.3	LINC00304	MIMAT0000451	hsa-miR-150-5p	ENSG00000136040	PLXNC1
ENSG00000236790.4	LINC00299	MIMAT0000451	hsa-miR-150-5p	ENSG00000264364	DYNLL2
ENSG00000180422.3	LINC00304	MIMAT0000451	hsa-miR-150-5p	ENSG00000006062	MAP3K14
ENSG00000180422.3	LINC00304	MIMAT0000451	hsa-miR-150-5p	ENSG00000186187	ZNRF1
ENSG00000261064.1	RP11-1000B6.3	MIMAT0000451	hsa-miR-150-5p	ENSG00000090889	KIF4A
ENSG00000261064.1	RP11-1000B6.3	MIMAT0000451	hsa-miR-150-5p	ENSG00000118513	MYB
ENSG00000206567.8	AC022007.5	MIMAT0000451	hsa-miR-150-5p	ENSG00000058804	NDC1
ENSG00000261064.1	RP11-1000B6.3	MIMAT0000451	hsa-miR-150-5p	ENSG00000113448	PDE4D
ENSG00000279712.1	CTA-280A3.2	MIMAT0000451	hsa-miR-150-5p	ENSG00000105976	MET
ENSG00000236790.4	LINC00299	MIMAT0000451	hsa-miR-150-5p	ENSG00000006062	MAP3K14
ENSG00000261064.1	RP11-1000B6.3	MIMAT0000451	hsa-miR-150-5p	ENSG00000171848	RRM2
ENSG00000236790.4	LINC00299	MIMAT0000451	hsa-miR-150-5p	ENSG00000171848	RRM2
ENSG00000206567.8	AC022007.5	MIMAT0000451	hsa-miR-150-5p	ENSG00000152601	MBNL1
ENSG00000279712.1	CTA-280A3.2	MIMAT0000451	hsa-miR-150-5p	ENSG00000186187	ZNRF1
ENSG00000236790.4	LINC00299	MIMAT0000451	hsa-miR-150-5p	ENSG00000105576	TNPO2
ENSG00000180422.3	LINC00304	MIMAT0000451	hsa-miR-150-5p	ENSG00000153214	TMEM87B
ENSG00000236790.4	LINC00299	MIMAT0000451	hsa-miR-150-5p	ENSG00000104783	KCNN4
ENSG00000236790.4	LINC00299	MIMAT0000451	hsa-miR-150-5p	ENSG00000135720	DYNC1LI2
ENSG00000261064.1	RP11-1000B6.3	MIMAT0000451	hsa-miR-150-5p	ENSG00000006062	MAP3K14
ENSG00000261064.1	RP11-1000B6.3	MIMAT0000451	hsa-miR-150-5p	ENSG00000125912	NCLN
ENSG00000261064.1	RP11-1000B6.3	MIMAT0000451	hsa-miR-150-5p	ENSG00000105976	MET
ENSG00000206567.8	AC022007.5	MIMAT0000451	hsa-miR-150-5p	ENSG00000111653	ING4
ENSG00000206567.8	AC022007.5	MIMAT0000451	hsa-miR-150-5p	ENSG00000154096	THY1
ENSG00000236790.4	LINC00299	MIMAT0000451	hsa-miR-150-5p	ENSG00000153214	TMEM87B
ENSG00000279712.1	CTA-280A3.2	MIMAT0000451	hsa-miR-150-5p	ENSG00000104738	MCM4
ENSG00000261064.1	RP11-1000B6.3	MIMAT0000451	hsa-miR-150-5p	ENSG00000186642	PDE2A
ENSG00000261064.1	RP11-1000B6.3	MIMAT0000451	hsa-miR-150-5p	ENSG00000105576	TNPO2
ENSG00000279712.1	CTA-280A3.2	MIMAT0000451	hsa-miR-150-5p	ENSG00000105576	TNPO2
ENSG00000239322.1	ATP6V1B1-AS1	MIMAT0000451	hsa-miR-150-5p	ENSG00000135720	DYNC1LI2
ENSG00000206567.8	AC022007.5	MIMAT0000451	hsa-miR-150-5p	ENSG00000110917	MLEC
ENSG00000239322.1	ATP6V1B1-AS1	MIMAT0000451	hsa-miR-150-5p	ENSG00000113448	PDE4D
ENSG00000206567.8	AC022007.5	MIMAT0000451	hsa-miR-150-5p	ENSG00000171848	RRM2
ENSG00000180422.3	LINC00304	MIMAT0000451	hsa-miR-150-5p	ENSG00000154096	THY1
ENSG00000206567.8	AC022007.5	MIMAT0000451	hsa-miR-150-5p	ENSG00000264364	DYNLL2
ENSG00000239322.1	ATP6V1B1-AS1	MIMAT0000451	hsa-miR-150-5p	ENSG00000100554	ATP6V1D
ENSG00000180422.3	LINC00304	MIMAT0000451	hsa-miR-150-5p	ENSG00000113448	PDE4D
ENSG00000279712.1	CTA-280A3.2	MIMAT0000451	hsa-miR-150-5p	ENSG00000186642	PDE2A
ENSG00000236790.4	LINC00299	MIMAT0000451	hsa-miR-150-5p	ENSG00000090889	KIF4A
ENSG00000236790.4	LINC00299	MIMAT0000451	hsa-miR-150-5p	ENSG00000152601	MBNL1
ENSG00000239322.1	ATP6V1B1-AS1	MIMAT0000451	hsa-miR-150-5p	ENSG00000105976	MET
ENSG00000279712.1	CTA-280A3.2	MIMAT0000451	hsa-miR-150-5p	ENSG00000264364	DYNLL2
ENSG00000279712.1	CTA-280A3.2	MIMAT0000451	hsa-miR-150-5p	ENSG00000171848	RRM2
ENSG00000239322.1	ATP6V1B1-AS1	MIMAT0000451	hsa-miR-150-5p	ENSG00000090889	KIF4A
ENSG00000206567.8	AC022007.5	MIMAT0000451	hsa-miR-150-5p	ENSG00000105576	TNPO2
ENSG00000206567.8	AC022007.5	MIMAT0000451	hsa-miR-150-5p	ENSG00000172081	MOB3A
ENSG00000279712.1	CTA-280A3.2	MIMAT0000451	hsa-miR-150-5p	ENSG00000006062	MAP3K14
ENSG00000261064.1	RP11-1000B6.3	MIMAT0000451	hsa-miR-150-5p	ENSG00000051180	RAD51
ENSG00000180422.3	LINC00304	MIMAT0000451	hsa-miR-150-5p	ENSG00000012048	BRCA1
ENSG00000279712.1	CTA-280A3.2	MIMAT0000451	hsa-miR-150-5p	ENSG00000125912	NCLN
ENSG00000239322.1	ATP6V1B1-AS1	MIMAT0000451	hsa-miR-150-5p	ENSG00000186642	PDE2A
ENSG00000236790.4	LINC00299	MIMAT0000451	hsa-miR-150-5p	ENSG00000118513	MYB
ENSG00000239322.1	ATP6V1B1-AS1	MIMAT0000451	hsa-miR-150-5p	ENSG00000115415	STAT1
ENSG00000180422.3	LINC00304	MIMAT0000451	hsa-miR-150-5p	ENSG00000105976	MET
ENSG00000180422.3	LINC00304	MIMAT0000451	hsa-miR-150-5p	ENSG00000110917	MLEC
ENSG00000180422.3	LINC00304	MIMAT0000451	hsa-miR-150-5p	ENSG00000118513	MYB
ENSG00000180422.3	LINC00304	MIMAT0000451	hsa-miR-150-5p	ENSG00000123358	NR4A1
ENSG00000206567.8	AC022007.5	MIMAT0000451	hsa-miR-150-5p	ENSG00000186642	PDE2A
ENSG00000180422.3	LINC00304	MIMAT0000451	hsa-miR-150-5p	ENSG00000058804	NDC1
ENSG00000239322.1	ATP6V1B1-AS1	MIMAT0000451	hsa-miR-150-5p	ENSG00000012048	BRCA1
ENSG00000206567.8	AC022007.5	MIMAT0000451	hsa-miR-150-5p	ENSG00000125912	NCLN
ENSG00000261064.1	RP11-1000B6.3	MIMAT0000451	hsa-miR-150-5p	ENSG00000136040	PLXNC1
ENSG00000239322.1	ATP6V1B1-AS1	MIMAT0000451	hsa-miR-150-5p	ENSG00000118513	MYB
ENSG00000239322.1	ATP6V1B1-AS1	MIMAT0000451	hsa-miR-150-5p	ENSG00000111653	ING4
ENSG00000239322.1	ATP6V1B1-AS1	MIMAT0000451	hsa-miR-150-5p	ENSG00000123358	NR4A1
ENSG00000261064.1	RP11-1000B6.3	MIMAT0000451	hsa-miR-150-5p	ENSG00000152601	MBNL1
ENSG00000239322.1	ATP6V1B1-AS1	MIMAT0000451	hsa-miR-150-5p	ENSG00000051180	RAD51
ENSG00000239322.1	ATP6V1B1-AS1	MIMAT0000451	hsa-miR-150-5p	ENSG00000110917	MLEC
ENSG00000206567.8	AC022007.5	MIMAT0000451	hsa-miR-150-5p	ENSG00000100554	ATP6V1D
ENSG00000279712.1	CTA-280A3.2	MIMAT0000451	hsa-miR-150-5p	ENSG00000153214	TMEM87B
ENSG00000261064.1	RP11-1000B6.3	MIMAT0000451	hsa-miR-150-5p	ENSG00000186187	ZNRF1
ENSG00000180422.3	LINC00304	MIMAT0000451	hsa-miR-150-5p	ENSG00000135720	DYNC1LI2
ENSG00000239322.1	ATP6V1B1-AS1	MIMAT0000451	hsa-miR-150-5p	ENSG00000264364	DYNLL2
ENSG00000239322.1	ATP6V1B1-AS1	MIMAT0000451	hsa-miR-150-5p	ENSG00000058804	NDC1
ENSG00000279712.1	CTA-280A3.2	MIMAT0000451	hsa-miR-150-5p	ENSG00000111653	ING4
ENSG00000279712.1	CTA-280A3.2	MIMAT0000451	hsa-miR-150-5p	ENSG00000136040	PLXNC1
ENSG00000239322.1	ATP6V1B1-AS1	MIMAT0000451	hsa-miR-150-5p	ENSG00000105576	TNPO2
ENSG00000239322.1	ATP6V1B1-AS1	MIMAT0000451	hsa-miR-150-5p	ENSG00000154096	THY1
ENSG00000236790.4	LINC00299	MIMAT0000451	hsa-miR-150-5p	ENSG00000123358	NR4A1
ENSG00000239322.1	ATP6V1B1-AS1	MIMAT0000451	hsa-miR-150-5p	ENSG00000136040	PLXNC1
ENSG00000180422.3	LINC00304	MIMAT0000451	hsa-miR-150-5p	ENSG00000105576	TNPO2
ENSG00000261064.1	RP11-1000B6.3	MIMAT0000451	hsa-miR-150-5p	ENSG00000100554	ATP6V1D
ENSG00000261064.1	RP11-1000B6.3	MIMAT0000451	hsa-miR-150-5p	ENSG00000115415	STAT1
ENSG00000261064.1	RP11-1000B6.3	MIMAT0000451	hsa-miR-150-5p	ENSG00000172081	MOB3A
ENSG00000261064.1	RP11-1000B6.3	MIMAT0000451	hsa-miR-150-5p	ENSG00000123358	NR4A1
ENSG00000206567.8	AC022007.5	MIMAT0000451	hsa-miR-150-5p	ENSG00000051180	RAD51
ENSG00000206567.8	AC022007.5	MIMAT0000451	hsa-miR-150-5p	ENSG00000104738	MCM4
ENSG00000236790.4	LINC00299	MIMAT0000451	hsa-miR-150-5p	ENSG00000115415	STAT1
ENSG00000236790.4	LINC00299	MIMAT0000451	hsa-miR-150-5p	ENSG00000136040	PLXNC1
ENSG00000206567.8	AC022007.5	MIMAT0000451	hsa-miR-150-5p	ENSG00000135720	DYNC1LI2
ENSG00000239322.1	ATP6V1B1-AS1	MIMAT0000451	hsa-miR-150-5p	ENSG00000104738	MCM4
ENSG00000236790.4	LINC00299	MIMAT0000451	hsa-miR-150-5p	ENSG00000051180	RAD51
ENSG00000236790.4	LINC00299	MIMAT0000451	hsa-miR-150-5p	ENSG00000172081	MOB3A
ENSG00000261064.1	RP11-1000B6.3	MIMAT0000451	hsa-miR-150-5p	ENSG00000264364	DYNLL2
ENSG00000206567.8	AC022007.5	MIMAT0000451	hsa-miR-150-5p	ENSG00000136040	PLXNC1
ENSG00000261064.1	RP11-1000B6.3	MIMAT0000451	hsa-miR-150-5p	ENSG00000135720	DYNC1LI2
ENSG00000261064.1	RP11-1000B6.3	MIMAT0000451	hsa-miR-150-5p	ENSG00000104783	KCNN4
ENSG00000261064.1	RP11-1000B6.3	MIMAT0000451	hsa-miR-150-5p	ENSG00000058804	NDC1
ENSG00000239322.1	ATP6V1B1-AS1	MIMAT0000451	hsa-miR-150-5p	ENSG00000006062	MAP3K14
ENSG00000236790.4	LINC00299	MIMAT0000451	hsa-miR-150-5p	ENSG00000186642	PDE2A
ENSG00000236790.4	LINC00299	MIMAT0000451	hsa-miR-150-5p	ENSG00000105976	MET
ENSG00000239322.1	ATP6V1B1-AS1	MIMAT0000451	hsa-miR-150-5p	ENSG00000125912	NCLN
ENSG00000236790.4	LINC00299	MIMAT0000451	hsa-miR-150-5p	ENSG00000104738	MCM4
ENSG00000206567.8	AC022007.5	MIMAT0000451	hsa-miR-150-5p	ENSG00000153214	TMEM87B
ENSG00000206567.8	AC022007.5	MIMAT0000451	hsa-miR-150-5p	ENSG00000105976	MET
ENSG00000279712.1	CTA-280A3.2	MIMAT0000451	hsa-miR-150-5p	ENSG00000154096	THY1
ENSG00000261064.1	RP11-1000B6.3	MIMAT0000451	hsa-miR-150-5p	ENSG00000104738	MCM4
ENSG00000236790.4	LINC00299	MIMAT0000451	hsa-miR-150-5p	ENSG00000113448	PDE4D
ENSG00000261064.1	RP11-1000B6.3	MIMAT0000451	hsa-miR-150-5p	ENSG00000110917	MLEC
ENSG00000279712.1	CTA-280A3.2	MIMAT0000451	hsa-miR-150-5p	ENSG00000152601	MBNL1
ENSG00000236790.4	LINC00299	MIMAT0000451	hsa-miR-150-5p	ENSG00000100554	ATP6V1D
ENSG00000206567.8	AC022007.5	MIMAT0000451	hsa-miR-150-5p	ENSG00000118513	MYB
ENSG00000236790.4	LINC00299	MIMAT0000451	hsa-miR-150-5p	ENSG00000111653	ING4
ENSG00000206567.8	AC022007.5	MIMAT0000451	hsa-miR-150-5p	ENSG00000115415	STAT1
ENSG00000180422.3	LINC00304	MIMAT0000451	hsa-miR-150-5p	ENSG00000104783	KCNN4
ENSG00000279712.1	CTA-280A3.2	MIMAT0000451	hsa-miR-150-5p	ENSG00000110917	MLEC
ENSG00000236790.4	LINC00299	MIMAT0000451	hsa-miR-150-5p	ENSG00000012048	BRCA1
ENSG00000279712.1	CTA-280A3.2	MIMAT0000451	hsa-miR-150-5p	ENSG00000090889	KIF4A
ENSG00000180422.3	LINC00304	MIMAT0000451	hsa-miR-150-5p	ENSG00000171848	RRM2
ENSG00000180422.3	LINC00304	MIMAT0000451	hsa-miR-150-5p	ENSG00000152601	MBNL1
ENSG00000206567.8	AC022007.5	MIMAT0000451	hsa-miR-150-5p	ENSG00000123358	NR4A1
ENSG00000272384.1	RP11-44N11.2	MIMAT0000646	hsa-miR-155-5p	ENSG00000105976	MET
ENSG00000229404.4	LINC00858	MIMAT0000646	hsa-miR-155-5p	ENSG00000118513	MYB
ENSG00000229404.4	LINC00858	MIMAT0000646	hsa-miR-155-5p	ENSG00000158769	F11R
ENSG00000272870.1	RP11-798M19.6	MIMAT0000646	hsa-miR-155-5p	ENSG00000158769	F11R
ENSG00000272384.1	RP11-44N11.2	MIMAT0000646	hsa-miR-155-5p	ENSG00000100554	ATP6V1D
ENSG00000272384.1	RP11-44N11.2	MIMAT0000646	hsa-miR-155-5p	ENSG00000104067	TJP1
ENSG00000272870.1	RP11-798M19.6	MIMAT0000646	hsa-miR-155-5p	ENSG00000198554	WDHD1
ENSG00000229404.4	LINC00858	MIMAT0000646	hsa-miR-155-5p	ENSG00000006062	MAP3K14
ENSG00000272870.1	RP11-798M19.6	MIMAT0000646	hsa-miR-155-5p	ENSG00000109586	GALNT7
ENSG00000229404.4	LINC00858	MIMAT0000646	hsa-miR-155-5p	ENSG00000100554	ATP6V1D
ENSG00000272870.1	RP11-798M19.6	MIMAT0000646	hsa-miR-155-5p	ENSG00000118513	MYB
ENSG00000272870.1	RP11-798M19.6	MIMAT0000646	hsa-miR-155-5p	ENSG00000100554	ATP6V1D
ENSG00000272870.1	RP11-798M19.6	MIMAT0000646	hsa-miR-155-5p	ENSG00000006062	MAP3K14
ENSG00000272870.1	RP11-798M19.6	MIMAT0000646	hsa-miR-155-5p	ENSG00000115415	STAT1
ENSG00000229404.4	LINC00858	MIMAT0000646	hsa-miR-155-5p	ENSG00000105976	MET
ENSG00000272384.1	RP11-44N11.2	MIMAT0000646	hsa-miR-155-5p	ENSG00000115415	STAT1
ENSG00000272384.1	RP11-44N11.2	MIMAT0000646	hsa-miR-155-5p	ENSG00000146648	EGFR
ENSG00000272384.1	RP11-44N11.2	MIMAT0000646	hsa-miR-155-5p	ENSG00000109586	GALNT7
ENSG00000229404.4	LINC00858	MIMAT0000646	hsa-miR-155-5p	ENSG00000113448	PDE4D
ENSG00000229404.4	LINC00858	MIMAT0000646	hsa-miR-155-5p	ENSG00000198554	WDHD1
ENSG00000229404.4	LINC00858	MIMAT0000646	hsa-miR-155-5p	ENSG00000109339	MAPK10
ENSG00000272384.1	RP11-44N11.2	MIMAT0000646	hsa-miR-155-5p	ENSG00000118513	MYB
ENSG00000229404.4	LINC00858	MIMAT0000646	hsa-miR-155-5p	ENSG00000146648	EGFR
ENSG00000272870.1	RP11-798M19.6	MIMAT0000646	hsa-miR-155-5p	ENSG00000105976	MET
ENSG00000229404.4	LINC00858	MIMAT0000646	hsa-miR-155-5p	ENSG00000115415	STAT1
ENSG00000229404.4	LINC00858	MIMAT0000646	hsa-miR-155-5p	ENSG00000109586	GALNT7
ENSG00000272870.1	RP11-798M19.6	MIMAT0000646	hsa-miR-155-5p	ENSG00000109339	MAPK10
ENSG00000272384.1	RP11-44N11.2	MIMAT0000646	hsa-miR-155-5p	ENSG00000109339	MAPK10
ENSG00000272384.1	RP11-44N11.2	MIMAT0000646	hsa-miR-155-5p	ENSG00000198554	WDHD1
ENSG00000272384.1	RP11-44N11.2	MIMAT0000646	hsa-miR-155-5p	ENSG00000006062	MAP3K14
ENSG00000272384.1	RP11-44N11.2	MIMAT0000646	hsa-miR-155-5p	ENSG00000113448	PDE4D
ENSG00000272870.1	RP11-798M19.6	MIMAT0000646	hsa-miR-155-5p	ENSG00000104067	TJP1
ENSG00000272870.1	RP11-798M19.6	MIMAT0000646	hsa-miR-155-5p	ENSG00000113448	PDE4D
ENSG00000272384.1	RP11-44N11.2	MIMAT0000646	hsa-miR-155-5p	ENSG00000158769	F11R
ENSG00000272870.1	RP11-798M19.6	MIMAT0000646	hsa-miR-155-5p	ENSG00000146648	EGFR
ENSG00000229404.4	LINC00858	MIMAT0000646	hsa-miR-155-5p	ENSG00000104067	TJP1
ENSG00000224743.5	TEX26-AS1	MIMAT0000068	hsa-miR-15a-5p	ENSG00000154096	THY1
ENSG00000267149.2	CTC-550B14.6	MIMAT0000068	hsa-miR-15a-5p	ENSG00000153214	TMEM87B
ENSG00000260464.1	RP4-561L24.3	MIMAT0000068	hsa-miR-15a-5p	ENSG00000108306	FBXL20
ENSG00000224743.5	TEX26-AS1	MIMAT0000068	hsa-miR-15a-5p	ENSG00000152601	MBNL1
ENSG00000259343.4	TMC3-AS1	MIMAT0000068	hsa-miR-15a-5p	ENSG00000109586	GALNT7
ENSG00000260464.1	RP4-561L24.3	MIMAT0000068	hsa-miR-15a-5p	ENSG00000143924	EML4
ENSG00000260464.1	RP4-561L24.3	MIMAT0000068	hsa-miR-15a-5p	ENSG00000011426	ANLN
ENSG00000259877.2	RP11-46C24.7	MIMAT0000068	hsa-miR-15a-5p	ENSG00000006062	MAP3K14
ENSG00000275437.1	RP5-908M14.10	MIMAT0000068	hsa-miR-15a-5p	ENSG00000264364	DYNLL2
ENSG00000224743.5	TEX26-AS1	MIMAT0000068	hsa-miR-15a-5p	ENSG00000006062	MAP3K14
ENSG00000259343.4	TMC3-AS1	MIMAT0000068	hsa-miR-15a-5p	ENSG00000140451	PIF1
ENSG00000276846.1	CTD-3220F14.3	MIMAT0000068	hsa-miR-15a-5p	ENSG00000110719	TCIRG1
ENSG00000260464.1	RP4-561L24.3	MIMAT0000068	hsa-miR-15a-5p	ENSG00000154096	THY1
ENSG00000276846.1	CTD-3220F14.3	MIMAT0000068	hsa-miR-15a-5p	ENSG00000075702	WDR62
ENSG00000276846.1	CTD-3220F14.3	MIMAT0000068	hsa-miR-15a-5p	ENSG00000006062	MAP3K14
ENSG00000224743.5	TEX26-AS1	MIMAT0000068	hsa-miR-15a-5p	ENSG00000109586	GALNT7
ENSG00000276846.1	CTD-3220F14.3	MIMAT0000068	hsa-miR-15a-5p	ENSG00000163820	FYCO1
ENSG00000267149.2	CTC-550B14.6	MIMAT0000068	hsa-miR-15a-5p	ENSG00000186187	ZNRF1
ENSG00000257497.2	RP11-585P4.5	MIMAT0000068	hsa-miR-15a-5p	ENSG00000172081	MOB3A
ENSG00000276846.1	CTD-3220F14.3	MIMAT0000068	hsa-miR-15a-5p	ENSG00000134874	DZIP1
ENSG00000259877.2	RP11-46C24.7	MIMAT0000068	hsa-miR-15a-5p	ENSG00000105281	SLC1A5
ENSG00000280734.1	LINC01232	MIMAT0000068	hsa-miR-15a-5p	ENSG00000119969	HELLS
ENSG00000260464.1	RP4-561L24.3	MIMAT0000068	hsa-miR-15a-5p	ENSG00000123358	NR4A1
ENSG00000249550.5	LINC01234	MIMAT0000068	hsa-miR-15a-5p	ENSG00000011426	ANLN
ENSG00000267149.2	CTC-550B14.6	MIMAT0000068	hsa-miR-15a-5p	ENSG00000109586	GALNT7
ENSG00000275437.1	RP5-908M14.10	MIMAT0000068	hsa-miR-15a-5p	ENSG00000108306	FBXL20
ENSG00000204832.8	ST8SIA6-AS1	MIMAT0000068	hsa-miR-15a-5p	ENSG00000176208	ATAD5
ENSG00000249550.5	LINC01234	MIMAT0000068	hsa-miR-15a-5p	ENSG00000123358	NR4A1
ENSG00000276846.1	CTD-3220F14.3	MIMAT0000068	hsa-miR-15a-5p	ENSG00000198554	WDHD1
ENSG00000280734.1	LINC01232	MIMAT0000068	hsa-miR-15a-5p	ENSG00000006062	MAP3K14
ENSG00000276846.1	CTD-3220F14.3	MIMAT0000068	hsa-miR-15a-5p	ENSG00000011426	ANLN
ENSG00000267149.2	CTC-550B14.6	MIMAT0000068	hsa-miR-15a-5p	ENSG00000118513	MYB
ENSG00000276846.1	CTD-3220F14.3	MIMAT0000068	hsa-miR-15a-5p	ENSG00000176208	ATAD5
ENSG00000257497.2	RP11-585P4.5	MIMAT0000068	hsa-miR-15a-5p	ENSG00000110719	TCIRG1
ENSG00000267149.2	CTC-550B14.6	MIMAT0000068	hsa-miR-15a-5p	ENSG00000011426	ANLN
ENSG00000267414.1	RP11-456K23.1	MIMAT0000068	hsa-miR-15a-5p	ENSG00000163820	FYCO1
ENSG00000260278.1	RP11-109G23.3	MIMAT0000068	hsa-miR-15a-5p	ENSG00000158769	F11R
ENSG00000231871.4	IPO9-AS1	MIMAT0000068	hsa-miR-15a-5p	ENSG00000123358	NR4A1
ENSG00000259343.4	TMC3-AS1	MIMAT0000068	hsa-miR-15a-5p	ENSG00000075702	WDR62
ENSG00000204832.8	ST8SIA6-AS1	MIMAT0000068	hsa-miR-15a-5p	ENSG00000152601	MBNL1
ENSG00000204832.8	ST8SIA6-AS1	MIMAT0000068	hsa-miR-15a-5p	ENSG00000136040	PLXNC1
ENSG00000249550.5	LINC01234	MIMAT0000068	hsa-miR-15a-5p	ENSG00000154096	THY1
ENSG00000204832.8	ST8SIA6-AS1	MIMAT0000068	hsa-miR-15a-5p	ENSG00000143924	EML4
ENSG00000257497.2	RP11-585P4.5	MIMAT0000068	hsa-miR-15a-5p	ENSG00000146648	EGFR
ENSG00000224743.5	TEX26-AS1	MIMAT0000068	hsa-miR-15a-5p	ENSG00000119969	HELLS
ENSG00000259343.4	TMC3-AS1	MIMAT0000068	hsa-miR-15a-5p	ENSG00000105281	SLC1A5
ENSG00000257497.2	RP11-585P4.5	MIMAT0000068	hsa-miR-15a-5p	ENSG00000140451	PIF1
ENSG00000216895.7	AC009403.2	MIMAT0000068	hsa-miR-15a-5p	ENSG00000137842	TMEM62
ENSG00000259343.4	TMC3-AS1	MIMAT0000068	hsa-miR-15a-5p	ENSG00000110917	MLEC
ENSG00000260278.1	RP11-109G23.3	MIMAT0000068	hsa-miR-15a-5p	ENSG00000160199	PKNOX1
ENSG00000224743.5	TEX26-AS1	MIMAT0000068	hsa-miR-15a-5p	ENSG00000051180	RAD51
ENSG00000249550.5	LINC01234	MIMAT0000068	hsa-miR-15a-5p	ENSG00000140451	PIF1
ENSG00000259877.2	RP11-46C24.7	MIMAT0000068	hsa-miR-15a-5p	ENSG00000104783	KCNN4
ENSG00000260464.1	RP4-561L24.3	MIMAT0000068	hsa-miR-15a-5p	ENSG00000166086	JAM3
ENSG00000269275.1	CTD-2105E13.15	MIMAT0000068	hsa-miR-15a-5p	ENSG00000109586	GALNT7
ENSG00000281852.1	LINC00891	MIMAT0000068	hsa-miR-15a-5p	ENSG00000105281	SLC1A5
ENSG00000204832.8	ST8SIA6-AS1	MIMAT0000068	hsa-miR-15a-5p	ENSG00000153214	TMEM87B
ENSG00000224743.5	TEX26-AS1	MIMAT0000068	hsa-miR-15a-5p	ENSG00000140451	PIF1
ENSG00000269275.1	CTD-2105E13.15	MIMAT0000068	hsa-miR-15a-5p	ENSG00000123358	NR4A1
ENSG00000257497.2	RP11-585P4.5	MIMAT0000068	hsa-miR-15a-5p	ENSG00000123358	NR4A1
ENSG00000245598.5	DACT3-AS1	MIMAT0000068	hsa-miR-15a-5p	ENSG00000186187	ZNRF1
ENSG00000231871.4	IPO9-AS1	MIMAT0000068	hsa-miR-15a-5p	ENSG00000160199	PKNOX1
ENSG00000259877.2	RP11-46C24.7	MIMAT0000068	hsa-miR-15a-5p	ENSG00000119969	HELLS
ENSG00000269275.1	CTD-2105E13.15	MIMAT0000068	hsa-miR-15a-5p	ENSG00000105281	SLC1A5
ENSG00000245598.5	DACT3-AS1	MIMAT0000068	hsa-miR-15a-5p	ENSG00000136040	PLXNC1
ENSG00000280734.1	LINC01232	MIMAT0000068	hsa-miR-15a-5p	ENSG00000166086	JAM3
ENSG00000204832.8	ST8SIA6-AS1	MIMAT0000068	hsa-miR-15a-5p	ENSG00000186187	ZNRF1
ENSG00000242759.5	LINC00882	MIMAT0000068	hsa-miR-15a-5p	ENSG00000160199	PKNOX1
ENSG00000204832.8	ST8SIA6-AS1	MIMAT0000068	hsa-miR-15a-5p	ENSG00000140451	PIF1
ENSG00000245598.5	DACT3-AS1	MIMAT0000068	hsa-miR-15a-5p	ENSG00000006062	MAP3K14
ENSG00000204832.8	ST8SIA6-AS1	MIMAT0000068	hsa-miR-15a-5p	ENSG00000135720	DYNC1LI2
ENSG00000269275.1	CTD-2105E13.15	MIMAT0000068	hsa-miR-15a-5p	ENSG00000075702	WDR62
ENSG00000272589.1	ZSWIM8-AS1	MIMAT0000068	hsa-miR-15a-5p	ENSG00000160199	PKNOX1
ENSG00000280734.1	LINC01232	MIMAT0000068	hsa-miR-15a-5p	ENSG00000153214	TMEM87B
ENSG00000231871.4	IPO9-AS1	MIMAT0000068	hsa-miR-15a-5p	ENSG00000186187	ZNRF1
ENSG00000245598.5	DACT3-AS1	MIMAT0000068	hsa-miR-15a-5p	ENSG00000153214	TMEM87B
ENSG00000272589.1	ZSWIM8-AS1	MIMAT0000068	hsa-miR-15a-5p	ENSG00000134874	DZIP1
ENSG00000259343.4	TMC3-AS1	MIMAT0000068	hsa-miR-15a-5p	ENSG00000136040	PLXNC1
ENSG00000257497.2	RP11-585P4.5	MIMAT0000068	hsa-miR-15a-5p	ENSG00000125740	FOSB
ENSG00000204832.8	ST8SIA6-AS1	MIMAT0000068	hsa-miR-15a-5p	ENSG00000075702	WDR62
ENSG00000276846.1	CTD-3220F14.3	MIMAT0000068	hsa-miR-15a-5p	ENSG00000135720	DYNC1LI2
ENSG00000280734.1	LINC01232	MIMAT0000068	hsa-miR-15a-5p	ENSG00000105281	SLC1A5
ENSG00000280734.1	LINC01232	MIMAT0000068	hsa-miR-15a-5p	ENSG00000151503	NCAPD3
ENSG00000244968.5	LIFR-AS1	MIMAT0000068	hsa-miR-15a-5p	ENSG00000146648	EGFR
ENSG00000280734.1	LINC01232	MIMAT0000068	hsa-miR-15a-5p	ENSG00000143924	EML4
ENSG00000242759.5	LINC00882	MIMAT0000068	hsa-miR-15a-5p	ENSG00000153214	TMEM87B
ENSG00000280734.1	LINC01232	MIMAT0000068	hsa-miR-15a-5p	ENSG00000158769	F11R
ENSG00000259877.2	RP11-46C24.7	MIMAT0000068	hsa-miR-15a-5p	ENSG00000160199	PKNOX1
ENSG00000275437.1	RP5-908M14.10	MIMAT0000068	hsa-miR-15a-5p	ENSG00000158769	F11R
ENSG00000272589.1	ZSWIM8-AS1	MIMAT0000068	hsa-miR-15a-5p	ENSG00000123358	NR4A1
ENSG00000231871.4	IPO9-AS1	MIMAT0000068	hsa-miR-15a-5p	ENSG00000102181	CD99L2
ENSG00000216895.7	AC009403.2	MIMAT0000068	hsa-miR-15a-5p	ENSG00000146648	EGFR
ENSG00000257497.2	RP11-585P4.5	MIMAT0000068	hsa-miR-15a-5p	ENSG00000160199	PKNOX1
ENSG00000275437.1	RP5-908M14.10	MIMAT0000068	hsa-miR-15a-5p	ENSG00000135720	DYNC1LI2
ENSG00000267149.2	CTC-550B14.6	MIMAT0000068	hsa-miR-15a-5p	ENSG00000163820	FYCO1
ENSG00000260464.1	RP4-561L24.3	MIMAT0000068	hsa-miR-15a-5p	ENSG00000075702	WDR62
ENSG00000242759.5	LINC00882	MIMAT0000068	hsa-miR-15a-5p	ENSG00000110719	TCIRG1
ENSG00000257497.2	RP11-585P4.5	MIMAT0000068	hsa-miR-15a-5p	ENSG00000154096	THY1
ENSG00000244968.5	LIFR-AS1	MIMAT0000068	hsa-miR-15a-5p	ENSG00000153214	TMEM87B
ENSG00000259877.2	RP11-46C24.7	MIMAT0000068	hsa-miR-15a-5p	ENSG00000152601	MBNL1
ENSG00000260278.1	RP11-109G23.3	MIMAT0000068	hsa-miR-15a-5p	ENSG00000143924	EML4
ENSG00000257497.2	RP11-585P4.5	MIMAT0000068	hsa-miR-15a-5p	ENSG00000264364	DYNLL2
ENSG00000259877.2	RP11-46C24.7	MIMAT0000068	hsa-miR-15a-5p	ENSG00000134874	DZIP1
ENSG00000259877.2	RP11-46C24.7	MIMAT0000068	hsa-miR-15a-5p	ENSG00000135720	DYNC1LI2
ENSG00000231871.4	IPO9-AS1	MIMAT0000068	hsa-miR-15a-5p	ENSG00000152601	MBNL1
ENSG00000269275.1	CTD-2105E13.15	MIMAT0000068	hsa-miR-15a-5p	ENSG00000186187	ZNRF1
ENSG00000276846.1	CTD-3220F14.3	MIMAT0000068	hsa-miR-15a-5p	ENSG00000118513	MYB
ENSG00000275437.1	RP5-908M14.10	MIMAT0000068	hsa-miR-15a-5p	ENSG00000006062	MAP3K14
ENSG00000249550.5	LINC01234	MIMAT0000068	hsa-miR-15a-5p	ENSG00000110917	MLEC
ENSG00000249550.5	LINC01234	MIMAT0000068	hsa-miR-15a-5p	ENSG00000160199	PKNOX1
ENSG00000260278.1	RP11-109G23.3	MIMAT0000068	hsa-miR-15a-5p	ENSG00000166086	JAM3
ENSG00000224995.1	LINC01526	MIMAT0000068	hsa-miR-15a-5p	ENSG00000110719	TCIRG1
ENSG00000275437.1	RP5-908M14.10	MIMAT0000068	hsa-miR-15a-5p	ENSG00000125740	FOSB
ENSG00000259910.1	RP11-616M22.2	MIMAT0000068	hsa-miR-15a-5p	ENSG00000113448	PDE4D
ENSG00000280734.1	LINC01232	MIMAT0000068	hsa-miR-15a-5p	ENSG00000051180	RAD51
ENSG00000260464.1	RP4-561L24.3	MIMAT0000068	hsa-miR-15a-5p	ENSG00000186187	ZNRF1
ENSG00000260464.1	RP4-561L24.3	MIMAT0000068	hsa-miR-15a-5p	ENSG00000113448	PDE4D
ENSG00000267149.2	CTC-550B14.6	MIMAT0000068	hsa-miR-15a-5p	ENSG00000146648	EGFR
ENSG00000269386.4	RAB11B-AS1	MIMAT0000068	hsa-miR-15a-5p	ENSG00000108306	FBXL20
ENSG00000269275.1	CTD-2105E13.15	MIMAT0000068	hsa-miR-15a-5p	ENSG00000153214	TMEM87B
ENSG00000260464.1	RP4-561L24.3	MIMAT0000068	hsa-miR-15a-5p	ENSG00000116679	IVNS1ABP
ENSG00000267149.2	CTC-550B14.6	MIMAT0000068	hsa-miR-15a-5p	ENSG00000151503	NCAPD3
ENSG00000267414.1	RP11-456K23.1	MIMAT0000068	hsa-miR-15a-5p	ENSG00000153214	TMEM87B
ENSG00000281852.1	LINC00891	MIMAT0000068	hsa-miR-15a-5p	ENSG00000158769	F11R
ENSG00000204832.8	ST8SIA6-AS1	MIMAT0000068	hsa-miR-15a-5p	ENSG00000163820	FYCO1
ENSG00000204832.8	ST8SIA6-AS1	MIMAT0000068	hsa-miR-15a-5p	ENSG00000102181	CD99L2
ENSG00000224995.1	LINC01526	MIMAT0000068	hsa-miR-15a-5p	ENSG00000152601	MBNL1
ENSG00000267581.1	CTC-559E9.4	MIMAT0000068	hsa-miR-15a-5p	ENSG00000166086	JAM3
ENSG00000259877.2	RP11-46C24.7	MIMAT0000068	hsa-miR-15a-5p	ENSG00000108306	FBXL20
ENSG00000228878.6	SEPT7-AS1	MIMAT0000068	hsa-miR-15a-5p	ENSG00000134874	DZIP1
ENSG00000267149.2	CTC-550B14.6	MIMAT0000068	hsa-miR-15a-5p	ENSG00000172081	MOB3A
ENSG00000276846.1	CTD-3220F14.3	MIMAT0000068	hsa-miR-15a-5p	ENSG00000110917	MLEC
ENSG00000231871.4	IPO9-AS1	MIMAT0000068	hsa-miR-15a-5p	ENSG00000176208	ATAD5
ENSG00000267581.1	CTC-559E9.4	MIMAT0000068	hsa-miR-15a-5p	ENSG00000134874	DZIP1
ENSG00000216895.7	AC009403.2	MIMAT0000068	hsa-miR-15a-5p	ENSG00000123358	NR4A1
ENSG00000269275.1	CTD-2105E13.15	MIMAT0000068	hsa-miR-15a-5p	ENSG00000051180	RAD51
ENSG00000245598.5	DACT3-AS1	MIMAT0000068	hsa-miR-15a-5p	ENSG00000264364	DYNLL2
ENSG00000273373.1	RP5-1074L1.4	MIMAT0000068	hsa-miR-15a-5p	ENSG00000134874	DZIP1
ENSG00000216895.7	AC009403.2	MIMAT0000068	hsa-miR-15a-5p	ENSG00000110917	MLEC
ENSG00000244968.5	LIFR-AS1	MIMAT0000068	hsa-miR-15a-5p	ENSG00000163820	FYCO1
ENSG00000272301.1	RP11-111M22.4	MIMAT0000068	hsa-miR-15a-5p	ENSG00000011426	ANLN
ENSG00000245598.5	DACT3-AS1	MIMAT0000068	hsa-miR-15a-5p	ENSG00000118513	MYB
ENSG00000272589.1	ZSWIM8-AS1	MIMAT0000068	hsa-miR-15a-5p	ENSG00000011426	ANLN
ENSG00000228878.6	SEPT7-AS1	MIMAT0000068	hsa-miR-15a-5p	ENSG00000160199	PKNOX1
ENSG00000244968.5	LIFR-AS1	MIMAT0000068	hsa-miR-15a-5p	ENSG00000166086	JAM3
ENSG00000257497.2	RP11-585P4.5	MIMAT0000068	hsa-miR-15a-5p	ENSG00000051180	RAD51
ENSG00000273373.1	RP5-1074L1.4	MIMAT0000068	hsa-miR-15a-5p	ENSG00000143924	EML4
ENSG00000267149.2	CTC-550B14.6	MIMAT0000068	hsa-miR-15a-5p	ENSG00000137842	TMEM62
ENSG00000280734.1	LINC01232	MIMAT0000068	hsa-miR-15a-5p	ENSG00000152601	MBNL1
ENSG00000216895.7	AC009403.2	MIMAT0000068	hsa-miR-15a-5p	ENSG00000186187	ZNRF1
ENSG00000272589.1	ZSWIM8-AS1	MIMAT0000068	hsa-miR-15a-5p	ENSG00000110719	TCIRG1
ENSG00000244968.5	LIFR-AS1	MIMAT0000068	hsa-miR-15a-5p	ENSG00000116679	IVNS1ABP
ENSG00000273373.1	RP5-1074L1.4	MIMAT0000068	hsa-miR-15a-5p	ENSG00000186187	ZNRF1
ENSG00000260464.1	RP4-561L24.3	MIMAT0000068	hsa-miR-15a-5p	ENSG00000119969	HELLS
ENSG00000273373.1	RP5-1074L1.4	MIMAT0000068	hsa-miR-15a-5p	ENSG00000160199	PKNOX1
ENSG00000273373.1	RP5-1074L1.4	MIMAT0000068	hsa-miR-15a-5p	ENSG00000006062	MAP3K14
ENSG00000259291.2	RP11-617F23.1	MIMAT0000068	hsa-miR-15a-5p	ENSG00000154096	THY1
ENSG00000259877.2	RP11-46C24.7	MIMAT0000068	hsa-miR-15a-5p	ENSG00000109586	GALNT7
ENSG00000245598.5	DACT3-AS1	MIMAT0000068	hsa-miR-15a-5p	ENSG00000134874	DZIP1
ENSG00000244968.5	LIFR-AS1	MIMAT0000068	hsa-miR-15a-5p	ENSG00000108306	FBXL20
ENSG00000273373.1	RP5-1074L1.4	MIMAT0000068	hsa-miR-15a-5p	ENSG00000051180	RAD51
ENSG00000224743.5	TEX26-AS1	MIMAT0000068	hsa-miR-15a-5p	ENSG00000011426	ANLN
ENSG00000260464.1	RP4-561L24.3	MIMAT0000068	hsa-miR-15a-5p	ENSG00000125740	FOSB
ENSG00000272301.1	RP11-111M22.4	MIMAT0000068	hsa-miR-15a-5p	ENSG00000166086	JAM3
ENSG00000216895.7	AC009403.2	MIMAT0000068	hsa-miR-15a-5p	ENSG00000125740	FOSB
ENSG00000267581.1	CTC-559E9.4	MIMAT0000068	hsa-miR-15a-5p	ENSG00000172081	MOB3A
ENSG00000273373.1	RP5-1074L1.4	MIMAT0000068	hsa-miR-15a-5p	ENSG00000176208	ATAD5
ENSG00000249550.5	LINC01234	MIMAT0000068	hsa-miR-15a-5p	ENSG00000152601	MBNL1
ENSG00000249550.5	LINC01234	MIMAT0000068	hsa-miR-15a-5p	ENSG00000075702	WDR62
ENSG00000267149.2	CTC-550B14.6	MIMAT0000068	hsa-miR-15a-5p	ENSG00000105281	SLC1A5
ENSG00000259291.2	RP11-617F23.1	MIMAT0000068	hsa-miR-15a-5p	ENSG00000158769	F11R
ENSG00000259343.4	TMC3-AS1	MIMAT0000068	hsa-miR-15a-5p	ENSG00000125740	FOSB
ENSG00000231871.4	IPO9-AS1	MIMAT0000068	hsa-miR-15a-5p	ENSG00000134874	DZIP1
ENSG00000272589.1	ZSWIM8-AS1	MIMAT0000068	hsa-miR-15a-5p	ENSG00000172081	MOB3A
ENSG00000273373.1	RP5-1074L1.4	MIMAT0000068	hsa-miR-15a-5p	ENSG00000158769	F11R
ENSG00000257497.2	RP11-585P4.5	MIMAT0000068	hsa-miR-15a-5p	ENSG00000186187	ZNRF1
ENSG00000269275.1	CTD-2105E13.15	MIMAT0000068	hsa-miR-15a-5p	ENSG00000134874	DZIP1
ENSG00000224743.5	TEX26-AS1	MIMAT0000068	hsa-miR-15a-5p	ENSG00000123358	NR4A1
ENSG00000259343.4	TMC3-AS1	MIMAT0000068	hsa-miR-15a-5p	ENSG00000264364	DYNLL2
ENSG00000244968.5	LIFR-AS1	MIMAT0000068	hsa-miR-15a-5p	ENSG00000113448	PDE4D
ENSG00000267414.1	RP11-456K23.1	MIMAT0000068	hsa-miR-15a-5p	ENSG00000108306	FBXL20
ENSG00000269275.1	CTD-2105E13.15	MIMAT0000068	hsa-miR-15a-5p	ENSG00000166086	JAM3
ENSG00000260278.1	RP11-109G23.3	MIMAT0000068	hsa-miR-15a-5p	ENSG00000264364	DYNLL2
ENSG00000259877.2	RP11-46C24.7	MIMAT0000068	hsa-miR-15a-5p	ENSG00000123358	NR4A1
ENSG00000259877.2	RP11-46C24.7	MIMAT0000068	hsa-miR-15a-5p	ENSG00000264364	DYNLL2
ENSG00000228878.6	SEPT7-AS1	MIMAT0000068	hsa-miR-15a-5p	ENSG00000198554	WDHD1
ENSG00000267581.1	CTC-559E9.4	MIMAT0000068	hsa-miR-15a-5p	ENSG00000110719	TCIRG1
ENSG00000260464.1	RP4-561L24.3	MIMAT0000068	hsa-miR-15a-5p	ENSG00000140451	PIF1
ENSG00000224743.5	TEX26-AS1	MIMAT0000068	hsa-miR-15a-5p	ENSG00000137842	TMEM62
ENSG00000267581.1	CTC-559E9.4	MIMAT0000068	hsa-miR-15a-5p	ENSG00000011426	ANLN
ENSG00000259343.4	TMC3-AS1	MIMAT0000068	hsa-miR-15a-5p	ENSG00000166086	JAM3
ENSG00000269275.1	CTD-2105E13.15	MIMAT0000068	hsa-miR-15a-5p	ENSG00000135720	DYNC1LI2
ENSG00000272301.1	RP11-111M22.4	MIMAT0000068	hsa-miR-15a-5p	ENSG00000108306	FBXL20
ENSG00000228878.6	SEPT7-AS1	MIMAT0000068	hsa-miR-15a-5p	ENSG00000163820	FYCO1
ENSG00000259910.1	RP11-616M22.2	MIMAT0000068	hsa-miR-15a-5p	ENSG00000125740	FOSB
ENSG00000216895.7	AC009403.2	MIMAT0000068	hsa-miR-15a-5p	ENSG00000153214	TMEM87B
ENSG00000267414.1	RP11-456K23.1	MIMAT0000068	hsa-miR-15a-5p	ENSG00000011426	ANLN
ENSG00000259343.4	TMC3-AS1	MIMAT0000068	hsa-miR-15a-5p	ENSG00000160199	PKNOX1
ENSG00000205930.7	C21orf62-AS1	MIMAT0000068	hsa-miR-15a-5p	ENSG00000140451	PIF1
ENSG00000228878.6	SEPT7-AS1	MIMAT0000068	hsa-miR-15a-5p	ENSG00000146648	EGFR
ENSG00000272589.1	ZSWIM8-AS1	MIMAT0000068	hsa-miR-15a-5p	ENSG00000176208	ATAD5
ENSG00000216895.7	AC009403.2	MIMAT0000068	hsa-miR-15a-5p	ENSG00000198554	WDHD1
ENSG00000280734.1	LINC01232	MIMAT0000068	hsa-miR-15a-5p	ENSG00000109586	GALNT7
ENSG00000224743.5	TEX26-AS1	MIMAT0000068	hsa-miR-15a-5p	ENSG00000108306	FBXL20
ENSG00000205930.7	C21orf62-AS1	MIMAT0000068	hsa-miR-15a-5p	ENSG00000011426	ANLN
ENSG00000280734.1	LINC01232	MIMAT0000068	hsa-miR-15a-5p	ENSG00000137842	TMEM62
ENSG00000245598.5	DACT3-AS1	MIMAT0000068	hsa-miR-15a-5p	ENSG00000051180	RAD51
ENSG00000272301.1	RP11-111M22.4	MIMAT0000068	hsa-miR-15a-5p	ENSG00000140451	PIF1
ENSG00000245598.5	DACT3-AS1	MIMAT0000068	hsa-miR-15a-5p	ENSG00000140451	PIF1
ENSG00000216895.7	AC009403.2	MIMAT0000068	hsa-miR-15a-5p	ENSG00000011426	ANLN
ENSG00000275437.1	RP5-908M14.10	MIMAT0000068	hsa-miR-15a-5p	ENSG00000075702	WDR62
ENSG00000204832.8	ST8SIA6-AS1	MIMAT0000068	hsa-miR-15a-5p	ENSG00000146648	EGFR
ENSG00000267414.1	RP11-456K23.1	MIMAT0000068	hsa-miR-15a-5p	ENSG00000134874	DZIP1
ENSG00000259343.4	TMC3-AS1	MIMAT0000068	hsa-miR-15a-5p	ENSG00000153214	TMEM87B
ENSG00000267149.2	CTC-550B14.6	MIMAT0000068	hsa-miR-15a-5p	ENSG00000119969	HELLS
ENSG00000267414.1	RP11-456K23.1	MIMAT0000068	hsa-miR-15a-5p	ENSG00000125740	FOSB
ENSG00000205930.7	C21orf62-AS1	MIMAT0000068	hsa-miR-15a-5p	ENSG00000134874	DZIP1
ENSG00000244968.5	LIFR-AS1	MIMAT0000068	hsa-miR-15a-5p	ENSG00000075702	WDR62
ENSG00000267581.1	CTC-559E9.4	MIMAT0000068	hsa-miR-15a-5p	ENSG00000075702	WDR62
ENSG00000224995.1	LINC01526	MIMAT0000068	hsa-miR-15a-5p	ENSG00000163820	FYCO1
ENSG00000271969.1	U47924.29	MIMAT0000068	hsa-miR-15a-5p	ENSG00000108306	FBXL20
ENSG00000267414.1	RP11-456K23.1	MIMAT0000068	hsa-miR-15a-5p	ENSG00000110719	TCIRG1
ENSG00000259291.2	RP11-617F23.1	MIMAT0000068	hsa-miR-15a-5p	ENSG00000160199	PKNOX1
ENSG00000245598.5	DACT3-AS1	MIMAT0000068	hsa-miR-15a-5p	ENSG00000104783	KCNN4
ENSG00000267414.1	RP11-456K23.1	MIMAT0000068	hsa-miR-15a-5p	ENSG00000118513	MYB
ENSG00000257167.2	TMPO-AS1	MIMAT0000068	hsa-miR-15a-5p	ENSG00000118513	MYB
ENSG00000267414.1	RP11-456K23.1	MIMAT0000068	hsa-miR-15a-5p	ENSG00000051180	RAD51
ENSG00000269386.4	RAB11B-AS1	MIMAT0000068	hsa-miR-15a-5p	ENSG00000264364	DYNLL2
ENSG00000259877.2	RP11-46C24.7	MIMAT0000068	hsa-miR-15a-5p	ENSG00000158769	F11R
ENSG00000260464.1	RP4-561L24.3	MIMAT0000068	hsa-miR-15a-5p	ENSG00000135720	DYNC1LI2
ENSG00000234949.2	AC104667.3	MIMAT0000068	hsa-miR-15a-5p	ENSG00000119969	HELLS
ENSG00000242759.5	LINC00882	MIMAT0000068	hsa-miR-15a-5p	ENSG00000134874	DZIP1
ENSG00000267581.1	CTC-559E9.4	MIMAT0000068	hsa-miR-15a-5p	ENSG00000140451	PIF1
ENSG00000267581.1	CTC-559E9.4	MIMAT0000068	hsa-miR-15a-5p	ENSG00000105281	SLC1A5
ENSG00000261008.5	LINC01572	MIMAT0000068	hsa-miR-15a-5p	ENSG00000137842	TMEM62
ENSG00000205930.7	C21orf62-AS1	MIMAT0000068	hsa-miR-15a-5p	ENSG00000153214	TMEM87B
ENSG00000267414.1	RP11-456K23.1	MIMAT0000068	hsa-miR-15a-5p	ENSG00000113448	PDE4D
ENSG00000267149.2	CTC-550B14.6	MIMAT0000068	hsa-miR-15a-5p	ENSG00000051180	RAD51
ENSG00000234949.2	AC104667.3	MIMAT0000068	hsa-miR-15a-5p	ENSG00000051180	RAD51
ENSG00000204832.8	ST8SIA6-AS1	MIMAT0000068	hsa-miR-15a-5p	ENSG00000011426	ANLN
ENSG00000273373.1	RP5-1074L1.4	MIMAT0000068	hsa-miR-15a-5p	ENSG00000123358	NR4A1
ENSG00000260464.1	RP4-561L24.3	MIMAT0000068	hsa-miR-15a-5p	ENSG00000102181	CD99L2
ENSG00000245598.5	DACT3-AS1	MIMAT0000068	hsa-miR-15a-5p	ENSG00000108306	FBXL20
ENSG00000272589.1	ZSWIM8-AS1	MIMAT0000068	hsa-miR-15a-5p	ENSG00000198554	WDHD1
ENSG00000272589.1	ZSWIM8-AS1	MIMAT0000068	hsa-miR-15a-5p	ENSG00000186187	ZNRF1
ENSG00000244968.5	LIFR-AS1	MIMAT0000068	hsa-miR-15a-5p	ENSG00000151503	NCAPD3
ENSG00000261008.5	LINC01572	MIMAT0000068	hsa-miR-15a-5p	ENSG00000118513	MYB
ENSG00000267581.1	CTC-559E9.4	MIMAT0000068	hsa-miR-15a-5p	ENSG00000109586	GALNT7
ENSG00000271969.1	U47924.29	MIMAT0000068	hsa-miR-15a-5p	ENSG00000198554	WDHD1
ENSG00000267581.1	CTC-559E9.4	MIMAT0000068	hsa-miR-15a-5p	ENSG00000102181	CD99L2
ENSG00000272931.1	RP5-943J3.2	MIMAT0000068	hsa-miR-15a-5p	ENSG00000104783	KCNN4
ENSG00000204832.8	ST8SIA6-AS1	MIMAT0000068	hsa-miR-15a-5p	ENSG00000108306	FBXL20
ENSG00000234949.2	AC104667.3	MIMAT0000068	hsa-miR-15a-5p	ENSG00000264364	DYNLL2
ENSG00000228878.6	SEPT7-AS1	MIMAT0000068	hsa-miR-15a-5p	ENSG00000154096	THY1
ENSG00000245598.5	DACT3-AS1	MIMAT0000068	hsa-miR-15a-5p	ENSG00000166086	JAM3
ENSG00000242759.5	LINC00882	MIMAT0000068	hsa-miR-15a-5p	ENSG00000186187	ZNRF1
ENSG00000261008.5	LINC01572	MIMAT0000068	hsa-miR-15a-5p	ENSG00000166086	JAM3
ENSG00000226530.1	RP11-348F1.2	MIMAT0000068	hsa-miR-15a-5p	ENSG00000172081	MOB3A
ENSG00000249550.5	LINC01234	MIMAT0000068	hsa-miR-15a-5p	ENSG00000105281	SLC1A5
ENSG00000260278.1	RP11-109G23.3	MIMAT0000068	hsa-miR-15a-5p	ENSG00000125740	FOSB
ENSG00000260464.1	RP4-561L24.3	MIMAT0000068	hsa-miR-15a-5p	ENSG00000137842	TMEM62
ENSG00000245598.5	DACT3-AS1	MIMAT0000068	hsa-miR-15a-5p	ENSG00000176208	ATAD5
ENSG00000245598.5	DACT3-AS1	MIMAT0000068	hsa-miR-15a-5p	ENSG00000163820	FYCO1
ENSG00000269275.1	CTD-2105E13.15	MIMAT0000068	hsa-miR-15a-5p	ENSG00000151503	NCAPD3
ENSG00000234949.2	AC104667.3	MIMAT0000068	hsa-miR-15a-5p	ENSG00000102181	CD99L2
ENSG00000228878.6	SEPT7-AS1	MIMAT0000068	hsa-miR-15a-5p	ENSG00000011426	ANLN
ENSG00000269275.1	CTD-2105E13.15	MIMAT0000068	hsa-miR-15a-5p	ENSG00000140451	PIF1
ENSG00000242759.5	LINC00882	MIMAT0000068	hsa-miR-15a-5p	ENSG00000140451	PIF1
ENSG00000260464.1	RP4-561L24.3	MIMAT0000068	hsa-miR-15a-5p	ENSG00000105281	SLC1A5
ENSG00000275437.1	RP5-908M14.10	MIMAT0000068	hsa-miR-15a-5p	ENSG00000136040	PLXNC1
ENSG00000269275.1	CTD-2105E13.15	MIMAT0000068	hsa-miR-15a-5p	ENSG00000163820	FYCO1
ENSG00000242759.5	LINC00882	MIMAT0000068	hsa-miR-15a-5p	ENSG00000011426	ANLN
ENSG00000259877.2	RP11-46C24.7	MIMAT0000068	hsa-miR-15a-5p	ENSG00000136040	PLXNC1
ENSG00000249550.5	LINC01234	MIMAT0000068	hsa-miR-15a-5p	ENSG00000119969	HELLS
ENSG00000224743.5	TEX26-AS1	MIMAT0000068	hsa-miR-15a-5p	ENSG00000118513	MYB
ENSG00000259953.1	RP11-4O1.2	MIMAT0000068	hsa-miR-15a-5p	ENSG00000163820	FYCO1
ENSG00000259953.1	RP11-4O1.2	MIMAT0000068	hsa-miR-15a-5p	ENSG00000172081	MOB3A
ENSG00000244968.5	LIFR-AS1	MIMAT0000068	hsa-miR-15a-5p	ENSG00000125740	FOSB
ENSG00000274080.1	CTA-315H11.2	MIMAT0000068	hsa-miR-15a-5p	ENSG00000109586	GALNT7
ENSG00000275437.1	RP5-908M14.10	MIMAT0000068	hsa-miR-15a-5p	ENSG00000176208	ATAD5
ENSG00000280734.1	LINC01232	MIMAT0000068	hsa-miR-15a-5p	ENSG00000198554	WDHD1
ENSG00000261008.5	LINC01572	MIMAT0000068	hsa-miR-15a-5p	ENSG00000075702	WDR62
ENSG00000272589.1	ZSWIM8-AS1	MIMAT0000068	hsa-miR-15a-5p	ENSG00000051180	RAD51
ENSG00000280734.1	LINC01232	MIMAT0000068	hsa-miR-15a-5p	ENSG00000140451	PIF1
ENSG00000280734.1	LINC01232	MIMAT0000068	hsa-miR-15a-5p	ENSG00000135720	DYNC1LI2
ENSG00000261008.5	LINC01572	MIMAT0000068	hsa-miR-15a-5p	ENSG00000163820	FYCO1
ENSG00000260278.1	RP11-109G23.3	MIMAT0000068	hsa-miR-15a-5p	ENSG00000137842	TMEM62
ENSG00000267414.1	RP11-456K23.1	MIMAT0000068	hsa-miR-15a-5p	ENSG00000152601	MBNL1
ENSG00000259877.2	RP11-46C24.7	MIMAT0000068	hsa-miR-15a-5p	ENSG00000116679	IVNS1ABP
ENSG00000259877.2	RP11-46C24.7	MIMAT0000068	hsa-miR-15a-5p	ENSG00000140451	PIF1
ENSG00000276846.1	CTD-3220F14.3	MIMAT0000068	hsa-miR-15a-5p	ENSG00000143924	EML4
ENSG00000228878.6	SEPT7-AS1	MIMAT0000068	hsa-miR-15a-5p	ENSG00000109586	GALNT7
ENSG00000267581.1	CTC-559E9.4	MIMAT0000068	hsa-miR-15a-5p	ENSG00000137842	TMEM62
ENSG00000267581.1	CTC-559E9.4	MIMAT0000068	hsa-miR-15a-5p	ENSG00000151503	NCAPD3
ENSG00000242759.5	LINC00882	MIMAT0000068	hsa-miR-15a-5p	ENSG00000119969	HELLS
ENSG00000226530.1	RP11-348F1.2	MIMAT0000068	hsa-miR-15a-5p	ENSG00000154096	THY1
ENSG00000245598.5	DACT3-AS1	MIMAT0000068	hsa-miR-15a-5p	ENSG00000102181	CD99L2
ENSG00000244968.5	LIFR-AS1	MIMAT0000068	hsa-miR-15a-5p	ENSG00000104783	KCNN4
ENSG00000216895.7	AC009403.2	MIMAT0000068	hsa-miR-15a-5p	ENSG00000152601	MBNL1
ENSG00000216895.7	AC009403.2	MIMAT0000068	hsa-miR-15a-5p	ENSG00000116679	IVNS1ABP
ENSG00000242759.5	LINC00882	MIMAT0000068	hsa-miR-15a-5p	ENSG00000006062	MAP3K14
ENSG00000280734.1	LINC01232	MIMAT0000068	hsa-miR-15a-5p	ENSG00000125740	FOSB
ENSG00000280734.1	LINC01232	MIMAT0000068	hsa-miR-15a-5p	ENSG00000075702	WDR62
ENSG00000259877.2	RP11-46C24.7	MIMAT0000068	hsa-miR-15a-5p	ENSG00000118513	MYB
ENSG00000226530.1	RP11-348F1.2	MIMAT0000068	hsa-miR-15a-5p	ENSG00000119969	HELLS
ENSG00000228878.6	SEPT7-AS1	MIMAT0000068	hsa-miR-15a-5p	ENSG00000102181	CD99L2
ENSG00000260464.1	RP4-561L24.3	MIMAT0000068	hsa-miR-15a-5p	ENSG00000198554	WDHD1
ENSG00000269275.1	CTD-2105E13.15	MIMAT0000068	hsa-miR-15a-5p	ENSG00000113448	PDE4D
ENSG00000244968.5	LIFR-AS1	MIMAT0000068	hsa-miR-15a-5p	ENSG00000134874	DZIP1
ENSG00000254343.2	RP11-760H22.2	MIMAT0000068	hsa-miR-15a-5p	ENSG00000151503	NCAPD3
ENSG00000275437.1	RP5-908M14.10	MIMAT0000068	hsa-miR-15a-5p	ENSG00000011426	ANLN
ENSG00000244968.5	LIFR-AS1	MIMAT0000068	hsa-miR-15a-5p	ENSG00000154096	THY1
ENSG00000265206.3	RP5-1171I10.5	MIMAT0000068	hsa-miR-15a-5p	ENSG00000146648	EGFR
ENSG00000234949.2	AC104667.3	MIMAT0000068	hsa-miR-15a-5p	ENSG00000104783	KCNN4
ENSG00000259291.2	RP11-617F23.1	MIMAT0000068	hsa-miR-15a-5p	ENSG00000166086	JAM3
ENSG00000245598.5	DACT3-AS1	MIMAT0000068	hsa-miR-15a-5p	ENSG00000152601	MBNL1
ENSG00000269275.1	CTD-2105E13.15	MIMAT0000068	hsa-miR-15a-5p	ENSG00000154096	THY1
ENSG00000269275.1	CTD-2105E13.15	MIMAT0000068	hsa-miR-15a-5p	ENSG00000011426	ANLN
ENSG00000226530.1	RP11-348F1.2	MIMAT0000068	hsa-miR-15a-5p	ENSG00000166086	JAM3
ENSG00000226530.1	RP11-348F1.2	MIMAT0000068	hsa-miR-15a-5p	ENSG00000051180	RAD51
ENSG00000226530.1	RP11-348F1.2	MIMAT0000068	hsa-miR-15a-5p	ENSG00000153214	TMEM87B
ENSG00000280734.1	LINC01232	MIMAT0000068	hsa-miR-15a-5p	ENSG00000264364	DYNLL2
ENSG00000224743.5	TEX26-AS1	MIMAT0000068	hsa-miR-15a-5p	ENSG00000110719	TCIRG1
ENSG00000280734.1	LINC01232	MIMAT0000068	hsa-miR-15a-5p	ENSG00000118513	MYB
ENSG00000224743.5	TEX26-AS1	MIMAT0000068	hsa-miR-15a-5p	ENSG00000153214	TMEM87B
ENSG00000260464.1	RP4-561L24.3	MIMAT0000068	hsa-miR-15a-5p	ENSG00000152601	MBNL1
ENSG00000244968.5	LIFR-AS1	MIMAT0000068	hsa-miR-15a-5p	ENSG00000102181	CD99L2
ENSG00000259708.1	RP11-762H8.3	MIMAT0000068	hsa-miR-15a-5p	ENSG00000143924	EML4
ENSG00000272931.1	RP5-943J3.2	MIMAT0000068	hsa-miR-15a-5p	ENSG00000158769	F11R
ENSG00000272589.1	ZSWIM8-AS1	MIMAT0000068	hsa-miR-15a-5p	ENSG00000264364	DYNLL2
ENSG00000259910.1	RP11-616M22.2	MIMAT0000068	hsa-miR-15a-5p	ENSG00000110917	MLEC
ENSG00000224995.1	LINC01526	MIMAT0000068	hsa-miR-15a-5p	ENSG00000264364	DYNLL2
ENSG00000267149.2	CTC-550B14.6	MIMAT0000068	hsa-miR-15a-5p	ENSG00000006062	MAP3K14
ENSG00000254343.2	RP11-760H22.2	MIMAT0000068	hsa-miR-15a-5p	ENSG00000153214	TMEM87B
ENSG00000270919.1	RP11-379K22.3	MIMAT0000068	hsa-miR-15a-5p	ENSG00000104783	KCNN4
ENSG00000153363.11	LINC00467	MIMAT0000068	hsa-miR-15a-5p	ENSG00000151503	NCAPD3
ENSG00000243069.6	ARHGEF26-AS1	MIMAT0000068	hsa-miR-15a-5p	ENSG00000105281	SLC1A5
ENSG00000268230.4	CTD-2619J13.8	MIMAT0000068	hsa-miR-15a-5p	ENSG00000116679	IVNS1ABP
ENSG00000268230.4	CTD-2619J13.8	MIMAT0000068	hsa-miR-15a-5p	ENSG00000118513	MYB
ENSG00000261008.5	LINC01572	MIMAT0000068	hsa-miR-15a-5p	ENSG00000186187	ZNRF1
ENSG00000261008.5	LINC01572	MIMAT0000068	hsa-miR-15a-5p	ENSG00000158769	F11R
ENSG00000269386.4	RAB11B-AS1	MIMAT0000068	hsa-miR-15a-5p	ENSG00000011426	ANLN
ENSG00000272589.1	ZSWIM8-AS1	MIMAT0000068	hsa-miR-15a-5p	ENSG00000158769	F11R
ENSG00000272589.1	ZSWIM8-AS1	MIMAT0000068	hsa-miR-15a-5p	ENSG00000113448	PDE4D
ENSG00000216895.7	AC009403.2	MIMAT0000068	hsa-miR-15a-5p	ENSG00000075702	WDR62
ENSG00000259291.2	RP11-617F23.1	MIMAT0000068	hsa-miR-15a-5p	ENSG00000163820	FYCO1
ENSG00000280734.1	LINC01232	MIMAT0000068	hsa-miR-15a-5p	ENSG00000110719	TCIRG1
ENSG00000242759.5	LINC00882	MIMAT0000068	hsa-miR-15a-5p	ENSG00000102181	CD99L2
ENSG00000272301.1	RP11-111M22.4	MIMAT0000068	hsa-miR-15a-5p	ENSG00000075702	WDR62
ENSG00000273272.1	CTA-384D8.34	MIMAT0000068	hsa-miR-15a-5p	ENSG00000154096	THY1
ENSG00000280734.1	LINC01232	MIMAT0000068	hsa-miR-15a-5p	ENSG00000113448	PDE4D
ENSG00000216895.7	AC009403.2	MIMAT0000068	hsa-miR-15a-5p	ENSG00000135720	DYNC1LI2
ENSG00000244968.5	LIFR-AS1	MIMAT0000068	hsa-miR-15a-5p	ENSG00000137842	TMEM62
ENSG00000259877.2	RP11-46C24.7	MIMAT0000068	hsa-miR-15a-5p	ENSG00000151503	NCAPD3
[truncated: 7,283 more rows]

## Sheet: Table S7
Table S7. STRING interactions for 100 h.pylori infection related genes.
#node1	node2	node1_string_id	node2_string_id	neighborhood_on_chromosome	gene_fusion	phylogenetic_cooccurrence	homology	coexpression	experimentally_determined_interaction	database_annotated	automated_textmining	combined_score
ANLN	NCAPH	9606.ENSP00000265748	9606.ENSP00000240423	0	0	0	0	0.625	0	0	0.081	0.641
ANLN	CMPK2	9606.ENSP00000265748	9606.ENSP00000256722	0	0	0	0	0	0	0	0.482	0.482
ANLN	MCM4	9606.ENSP00000265748	9606.ENSP00000262105	0	0	0	0	0.6	0	0	0.049	0.603
ANLN	CENPI	9606.ENSP00000265748	9606.ENSP00000362018	0	0	0	0	0.341	0	0	0.154	0.419
ANLN	ING4	9606.ENSP00000265748	9606.ENSP00000380024	0	0	0	0	0	0	0	0.433	0.433
ANLN	WDHD1	9606.ENSP00000265748	9606.ENSP00000353793	0	0	0	0	0.574	0	0	0	0.574
ANLN	HELLS	9606.ENSP00000265748	9606.ENSP00000377601	0	0	0	0	0.53	0	0	0.172	0.594
ANLN	ATAD2	9606.ENSP00000265748	9606.ENSP00000287394	0	0	0	0	0.568	0	0	0.167	0.625
ANLN	BRCA1	9606.ENSP00000265748	9606.ENSP00000418960	0	0	0	0	0.3	0.691	0	0.096	0.787
ANLN	DEPDC1	9606.ENSP00000265748	9606.ENSP00000412292	0	0	0	0	0.79	0	0	0.09	0.801
ANLN	KIF15	9606.ENSP00000265748	9606.ENSP00000324020	0	0	0	0	0.747	0.08	0	0.357	0.837
ANLN	RRM2	9606.ENSP00000265748	9606.ENSP00000353770	0	0	0	0	0.795	0	0	0.267	0.843
ANLN	PLK1	9606.ENSP00000265748	9606.ENSP00000300093	0	0	0	0	0.66	0	0	0.616	0.864
ANLN	KIF4A	9606.ENSP00000265748	9606.ENSP00000363524	0	0	0	0	0.797	0.08	0	0.569	0.912
ARHGAP30	ARHGAP9	9606.ENSP00000356992	9606.ENSP00000377380	0	0	0	0.577	0.555	0	0	0.261	0.599
ATAD2	MCM4	9606.ENSP00000287394	9606.ENSP00000262105	0	0	0	0	0.685	0.052	0	0.048	0.691
ATAD2	DEPDC1	9606.ENSP00000287394	9606.ENSP00000412292	0	0	0	0	0.405	0	0	0	0.405
ATAD2	E2F8	9606.ENSP00000287394	9606.ENSP00000481103	0	0	0	0	0.231	0.065	0	0.267	0.426
ATAD2	WDHD1	9606.ENSP00000287394	9606.ENSP00000353793	0	0	0	0	0.461	0	0	0	0.461
ATAD2	HELLS	9606.ENSP00000287394	9606.ENSP00000377601	0	0	0	0	0.43	0.157	0	0.2	0.583
ATAD2	KIF4A	9606.ENSP00000287394	9606.ENSP00000363524	0	0	0	0	0.594	0.084	0	0.21	0.68
ATAD2	MYC	9606.ENSP00000287394	9606.ENSP00000479618	0	0	0	0	0.098	0.379	0	0.619	0.768
ATAD2	KIF15	9606.ENSP00000287394	9606.ENSP00000324020	0	0	0	0	0.664	0.084	0	0.363	0.787
ATAD2	RRM2	9606.ENSP00000287394	9606.ENSP00000353770	0	0	0	0	0.782	0	0	0.199	0.818
ATAD5	MCM4	9606.ENSP00000313171	9606.ENSP00000262105	0	0	0	0	0.699	0.068	0	0.505	0.849
ATAD5	CHTF18	9606.ENSP00000313171	9606.ENSP00000262315	0	0	0	0.541	0.423	0.412	0	0.933	0.797
ATAD5	ESCO2	9606.ENSP00000313171	9606.ENSP00000306999	0	0	0	0	0.243	0.262	0	0.381	0.624
ATAD5	EME1	9606.ENSP00000313171	9606.ENSP00000376952	0	0	0	0	0.14	0	0	0.341	0.409
ATAD5	HELLS	9606.ENSP00000313171	9606.ENSP00000377601	0	0	0	0	0.372	0.085	0	0.074	0.421
ATAD5	BRCA1	9606.ENSP00000313171	9606.ENSP00000418960	0	0	0	0	0.276	0	0	0.345	0.505
ATAD5	DNA2	9606.ENSP00000313171	9606.ENSP00000351185	0	0	0	0	0.25	0.302	0	0.469	0.697
ATAD5	RAD51	9606.ENSP00000313171	9606.ENSP00000372088	0	0	0	0	0.244	0.133	0	0.598	0.714
ATAD5	PIF1	9606.ENSP00000313171	9606.ENSP00000328174	0	0	0	0	0.17	0.133	0	0.681	0.751
ATAD5	WDHD1	9606.ENSP00000313171	9606.ENSP00000353793	0	0	0	0	0.528	0.266	0	0.778	0.916
ATP6V1D	MLEC	9606.ENSP00000216442	9606.ENSP00000228506	0	0	0	0	0	0	0.9	0	0.9
ATP6V1D	TCIRG1	9606.ENSP00000216442	9606.ENSP00000265686	0.167	0	0	0	0.064	0.896	0.9	0.604	0.996
BMPR1A	ZMYND11	9606.ENSP00000361107	9606.ENSP00000381053	0	0	0	0	0.081	0.294	0	0.492	0.642
BRCA1	MCM4	9606.ENSP00000418960	9606.ENSP00000262105	0	0	0	0	0.364	0	0	0.333	0.558
BRCA1	CHTF18	9606.ENSP00000418960	9606.ENSP00000262315	0	0	0	0	0.27	0	0	0.222	0.408
BRCA1	EGFR	9606.ENSP00000418960	9606.ENSP00000275493	0	0	0	0	0	0	0	0.7	0.7
BRCA1	PLK1	9606.ENSP00000418960	9606.ENSP00000300093	0	0	0	0	0.257	0.693	0	0.584	0.897
BRCA1	ESCO2	9606.ENSP00000418960	9606.ENSP00000306999	0	0	0	0	0.251	0	0	0.261	0.424
BRCA1	KIF15	9606.ENSP00000418960	9606.ENSP00000324020	0	0	0	0	0.64	0	0	0.132	0.674
BRCA1	DNA2	9606.ENSP00000418960	9606.ENSP00000351185	0	0	0	0	0.403	0	0.9	0.628	0.975
BRCA1	RRM2	9606.ENSP00000418960	9606.ENSP00000353770	0	0	0	0	0.409	0	0	0.35	0.6
BRCA1	WDHD1	9606.ENSP00000418960	9606.ENSP00000353793	0	0	0	0	0.411	0	0	0.279	0.557
BRCA1	STAT1	9606.ENSP00000418960	9606.ENSP00000354394	0	0	0	0	0	0.379	0	0.399	0.61
BRCA1	JUN	9606.ENSP00000418960	9606.ENSP00000360266	0	0	0	0	0	0.447	0	0.48	0.7
BRCA1	CENPI	9606.ENSP00000418960	9606.ENSP00000362018	0	0	0	0	0.272	0.693	0	0.095	0.78
BRCA1	KIF4A	9606.ENSP00000418960	9606.ENSP00000363524	0	0	0	0	0.371	0.693	0	0.239	0.84
BRCA1	RAD51	9606.ENSP00000418960	9606.ENSP00000372088	0	0	0	0	0.384	0.763	0.9	0.873	0.997
BRCA1	EME1	9606.ENSP00000418960	9606.ENSP00000376952	0	0	0	0	0.195	0.693	0.9	0.499	0.985
BRCA1	HELLS	9606.ENSP00000418960	9606.ENSP00000377601	0	0	0	0	0.367	0.052	0	0.137	0.438
BRCA1	E2F8	9606.ENSP00000418960	9606.ENSP00000481103	0	0	0	0	0.194	0	0	0.418	0.512
BRCA1	UHRF1	9606.ENSP00000418960	9606.ENSP00000479617	0	0	0	0	0.371	0	0	0.341	0.568
BRCA1	NCAPD3	9606.ENSP00000418960	9606.ENSP00000433681	0	0	0	0	0.157	0.693	0	0.165	0.765
BRCA1	MYC	9606.ENSP00000418960	9606.ENSP00000479618	0	0	0	0	0.061	0.379	0	0.683	0.799
CCL3	NFKBIA	9606.ENSP00000477908	9606.ENSP00000216797	0	0	0	0	0.152	0	0	0.386	0.457
CCL3	CXCL8	9606.ENSP00000477908	9606.ENSP00000306512	0	0	0	0	0.187	0	0	0.842	0.866
CCL3	STAT1	9606.ENSP00000477908	9606.ENSP00000354394	0	0	0	0	0.058	0	0	0.487	0.496
CCL3	RGS1	9606.ENSP00000477908	9606.ENSP00000356429	0	0	0	0	0.566	0	0	0.247	0.659
CCL3	CXCL1	9606.ENSP00000477908	9606.ENSP00000379110	0	0	0	0	0.14	0	0	0.824	0.842
CCL5	NFKBIA	9606.ENSP00000474412	9606.ENSP00000216797	0	0	0	0	0.065	0	0	0.45	0.463
CCL5	EGFR	9606.ENSP00000474412	9606.ENSP00000275493	0	0	0	0	0	0	0	0.419	0.418
CCL5	CXCL8	9606.ENSP00000474412	9606.ENSP00000306512	0	0	0	0	0.064	0.397	0.9	0.904	0.993
CCL5	STAT1	9606.ENSP00000474412	9606.ENSP00000354394	0	0	0	0	0.139	0	0	0.773	0.797
CCL5	JUN	9606.ENSP00000474412	9606.ENSP00000360266	0	0	0	0	0	0	0.8	0.51	0.897
CCL5	CXCL1	9606.ENSP00000474412	9606.ENSP00000379110	0	0	0	0	0.063	0.069	0.9	0.867	0.986
CD99L2	JAM3	9606.ENSP00000480322	9606.ENSP00000299106	0	0	0	0	0	0	0	0.443	0.443
CD99L2	F11R	9606.ENSP00000480322	9606.ENSP00000357005	0	0	0	0	0	0	0	0.461	0.461
CENPH	NCAPH	9606.ENSP00000283006	9606.ENSP00000240423	0	0	0	0	0.374	0	0	0.209	0.484
CENPH	DYNC1LI2	9606.ENSP00000283006	9606.ENSP00000258198	0	0	0	0	0	0	0.9	0	0.9
CENPH	RAD51	9606.ENSP00000283006	9606.ENSP00000372088	0	0	0	0	0.418	0	0	0.107	0.458
CENPH	DEPDC1	9606.ENSP00000283006	9606.ENSP00000412292	0	0	0	0	0.344	0	0	0.229	0.473
CENPH	RRM2	9606.ENSP00000283006	9606.ENSP00000353770	0	0	0	0	0.41	0	0	0.205	0.511
CENPH	KIF4A	9606.ENSP00000283006	9606.ENSP00000363524	0	0	0	0	0.367	0	0	0.261	0.512
CENPH	KIF15	9606.ENSP00000283006	9606.ENSP00000324020	0	0	0	0	0.51	0	0	0.345	0.666
CENPH	DYNLL2	9606.ENSP00000283006	9606.ENSP00000477310	0	0	0	0	0	0	0.9	0	0.9
CENPH	PLK1	9606.ENSP00000283006	9606.ENSP00000300093	0	0	0	0	0.401	0	0.9	0.33	0.956
CENPH	CENPI	9606.ENSP00000283006	9606.ENSP00000362018	0	0	0	0	0.287	0.566	0.9	0.918	0.997
CENPI	NCAPH	9606.ENSP00000362018	9606.ENSP00000240423	0	0	0	0	0.384	0	0	0.186	0.477
CENPI	DYNC1LI2	9606.ENSP00000362018	9606.ENSP00000258198	0	0	0	0	0	0	0.9	0	0.9
CENPI	CHTF18	9606.ENSP00000362018	9606.ENSP00000262315	0	0	0	0	0.159	0	0	0.391	0.467
CENPI	PLK1	9606.ENSP00000362018	9606.ENSP00000300093	0	0	0	0	0.413	0	0.9	0.393	0.961
CENPI	ESCO2	9606.ENSP00000362018	9606.ENSP00000306999	0	0	0	0	0.487	0	0	0	0.487
CENPI	KIF15	9606.ENSP00000362018	9606.ENSP00000324020	0	0	0	0	0.232	0	0	0.308	0.446
CENPI	HELLS	9606.ENSP00000362018	9606.ENSP00000377601	0	0	0	0	0.314	0.132	0	0.086	0.409
CENPI	UHRF1	9606.ENSP00000362018	9606.ENSP00000479617	0	0	0	0	0.485	0	0	0	0.485
CENPI	DEPDC1	9606.ENSP00000362018	9606.ENSP00000412292	0	0	0	0	0.581	0	0	0.167	0.636
CENPI	KIF4A	9606.ENSP00000362018	9606.ENSP00000363524	0	0	0	0	0.705	0	0	0.102	0.724
CENPI	DYNLL2	9606.ENSP00000362018	9606.ENSP00000477310	0	0	0	0	0	0	0.9	0	0.9
CHTF18	NCAPH	9606.ENSP00000262315	9606.ENSP00000240423	0	0	0	0	0.635	0	0	0.204	0.697
CHTF18	MCM4	9606.ENSP00000262315	9606.ENSP00000262105	0	0	0	0	0.732	0.085	0	0.663	0.91
CHTF18	PLK1	9606.ENSP00000262315	9606.ENSP00000300093	0	0	0	0	0.356	0	0	0.14	0.423
CHTF18	KIF4A	9606.ENSP00000262315	9606.ENSP00000363524	0	0	0	0	0.467	0.059	0	0.05	0.482
CHTF18	KIF15	9606.ENSP00000262315	9606.ENSP00000324020	0	0	0	0	0.362	0.059	0	0.359	0.582
CHTF18	PIF1	9606.ENSP00000262315	9606.ENSP00000328174	0	0	0	0	0.225	0.128	0	0.482	0.619
CHTF18	UHRF1	9606.ENSP00000262315	9606.ENSP00000479617	0	0	0	0	0.563	0	0	0.181	0.627
CHTF18	DNA2	9606.ENSP00000262315	9606.ENSP00000351185	0	0	0	0	0.176	0.064	0	0.585	0.652
CHTF18	RAD51	9606.ENSP00000262315	9606.ENSP00000372088	0	0	0	0	0.449	0.084	0	0.47	0.709
CHTF18	ESCO2	9606.ENSP00000262315	9606.ENSP00000306999	0	0	0	0	0.232	0.267	0	0.913	0.947
CHTF18	WDHD1	9606.ENSP00000262315	9606.ENSP00000353793	0	0	0	0	0.84	0.173	0	0.898	0.985
CMPK2	XAF1	9606.ENSP00000256722	9606.ENSP00000354822	0	0	0	0	0.159	0	0	0.465	0.531
CMPK2	STAT1	9606.ENSP00000256722	9606.ENSP00000354394	0	0	0	0	0.408	0	0	0.275	0.553
CMPK2	RRM2	9606.ENSP00000256722	9606.ENSP00000353770	0	0	0	0	0.164	0.05	0.9	0.203	0.928
CXCL1	NFKBIA	9606.ENSP00000379110	9606.ENSP00000216797	0	0	0	0	0.134	0	0	0.445	0.499
CXCL1	EGFR	9606.ENSP00000379110	9606.ENSP00000275493	0	0	0	0	0	0	0	0.645	0.645
CXCL1	CXCL8	9606.ENSP00000379110	9606.ENSP00000306512	0	0	0	0.878	0.842	0	0.9	0.918	0.985
CXCL1	STAT1	9606.ENSP00000379110	9606.ENSP00000354394	0	0	0	0	0	0	0	0.557	0.557
CXCL1	JUN	9606.ENSP00000379110	9606.ENSP00000360266	0	0	0	0	0.049	0	0.8	0.448	0.885
CXCL8	NFKBIA	9606.ENSP00000306512	9606.ENSP00000216797	0	0	0	0	0.272	0	0	0.67	0.749
CXCL8	EGFR	9606.ENSP00000306512	9606.ENSP00000275493	0	0	0	0	0	0	0	0.817	0.817
CXCL8	TJP1	9606.ENSP00000306512	9606.ENSP00000281537	0	0	0	0	0	0	0	0.534	0.534
CXCL8	THY1	9606.ENSP00000306512	9606.ENSP00000284240	0	0	0	0	0	0	0	0.456	0.456
CXCL8	MET	9606.ENSP00000306512	9606.ENSP00000317272	0	0	0	0	0	0	0	0.441	0.441
CXCL8	STAT1	9606.ENSP00000306512	9606.ENSP00000354394	0	0	0	0	0	0	0	0.661	0.661
CXCL8	MYC	9606.ENSP00000306512	9606.ENSP00000479618	0	0	0	0	0.062	0	0	0.721	0.727
CXCL8	LYN	9606.ENSP00000306512	9606.ENSP00000428924	0	0	0	0	0.076	0	0.9	0.375	0.937
CXCL8	JUN	9606.ENSP00000306512	9606.ENSP00000360266	0	0	0	0	0.095	0.294	0.8	0.799	0.971
DEPDC1	NCAPH	9606.ENSP00000412292	9606.ENSP00000240423	0	0	0	0	0.601	0	0	0.17	0.654
DEPDC1	PLK1	9606.ENSP00000412292	9606.ENSP00000300093	0	0	0	0	0.586	0	0	0.211	0.66
DEPDC1	ESCO2	9606.ENSP00000412292	9606.ENSP00000306999	0	0	0	0	0.532	0	0	0.057	0.54
DEPDC1	KIF15	9606.ENSP00000412292	9606.ENSP00000324020	0	0	0	0	0.809	0	0	0.319	0.864
DEPDC1	RRM2	9606.ENSP00000412292	9606.ENSP00000353770	0	0	0	0	0.773	0	0	0.25	0.822
DEPDC1	WDHD1	9606.ENSP00000412292	9606.ENSP00000353793	0	0	0	0	0.564	0	0	0	0.564
DEPDC1	KIF4A	9606.ENSP00000412292	9606.ENSP00000363524	0	0	0	0	0.727	0	0	0.265	0.79
DEPDC1	HELLS	9606.ENSP00000412292	9606.ENSP00000377601	0	0	0	0	0.519	0	0	0.151	0.574
DEPDC1	E2F8	9606.ENSP00000412292	9606.ENSP00000481103	0	0	0	0	0.398	0	0	0.07	0.416
DNA2	MCM4	9606.ENSP00000351185	9606.ENSP00000262105	0	0	0	0	0.258	0.06	0	0.458	0.589
DNA2	KIF15	9606.ENSP00000351185	9606.ENSP00000324020	0	0	0	0	0.397	0	0	0.095	0.431
DNA2	PIF1	9606.ENSP00000351185	9606.ENSP00000328174	0.072	0	0	0	0.2	0.55	0	0.894	0.96
DNA2	KIF4A	9606.ENSP00000351185	9606.ENSP00000363524	0	0	0	0	0.71	0	0	0.041	0.71
DNA2	EME1	9606.ENSP00000351185	9606.ENSP00000376952	0	0	0	0	0.133	0	0.9	0.627	0.964
DNA2	WDHD1	9606.ENSP00000351185	9606.ENSP00000353793	0	0	0	0	0.42	0.853	0	0.872	0.988
DNA2	RAD51	9606.ENSP00000351185	9606.ENSP00000372088	0	0	0.237	0	0.235	0.406	0.9	0.882	0.995
DYNC1LI2	PLK1	9606.ENSP00000258198	9606.ENSP00000300093	0	0	0	0	0	0	0.9	0.06	0.902
DYNC1LI2	KIF15	9606.ENSP00000258198	9606.ENSP00000324020	0	0	0	0	0.094	0	0.9	0.058	0.907
DYNC1LI2	KIF4A	9606.ENSP00000258198	9606.ENSP00000363524	0	0	0	0	0.067	0	0.9	0.172	0.916
DYNC1LI2	DYNLL2	9606.ENSP00000258198	9606.ENSP00000477310	0	0	0	0	0.06	0	0.9	0.687	0.968
DYNLL2	PLK1	9606.ENSP00000477310	9606.ENSP00000300093	0	0	0	0	0.061	0	0.9	0.095	0.907
DYNLL2	KIF15	9606.ENSP00000477310	9606.ENSP00000324020	0	0	0	0	0	0.056	0.9	0.067	0.904
DYNLL2	KIF4A	9606.ENSP00000477310	9606.ENSP00000363524	0	0	0	0	0	0.056	0.9	0.067	0.904
DZIP1	PLK1	9606.ENSP00000257312	9606.ENSP00000300093	0	0	0	0	0	0	0	0.483	0.483
DZIP1	TGDS	9606.ENSP00000257312	9606.ENSP00000261296	0	0	0	0	0	0	0	0.584	0.584
E2F8	NCAPH	9606.ENSP00000481103	9606.ENSP00000240423	0	0	0	0	0.392	0	0	0.146	0.459
E2F8	MCM4	9606.ENSP00000481103	9606.ENSP00000262105	0	0	0	0	0.305	0.085	0	0.339	0.543
E2F8	PLK1	9606.ENSP00000481103	9606.ENSP00000300093	0	0	0	0	0.233	0	0	0.34	0.472
E2F8	KIF15	9606.ENSP00000481103	9606.ENSP00000324020	0	0	0	0	0.877	0	0	0.265	0.906
E2F8	RRM2	9606.ENSP00000481103	9606.ENSP00000353770	0	0	0	0	0.904	0	0	0.339	0.934
E2F8	KIF4A	9606.ENSP00000481103	9606.ENSP00000363524	0	0	0	0	0.396	0	0	0.074	0.416
E2F8	RAD51	9606.ENSP00000481103	9606.ENSP00000372088	0	0	0	0	0.32	0.084	0	0.254	0.495
E2F8	HELLS	9606.ENSP00000481103	9606.ENSP00000377601	0	0	0	0	0.35	0.098	0	0.211	0.497
E2F8	UHRF1	9606.ENSP00000481103	9606.ENSP00000479617	0	0	0	0	0.349	0	0	0.21	0.464
E2F8	MYC	9606.ENSP00000481103	9606.ENSP00000479618	0	0	0	0	0.076	0	0	0.518	0.536
EGFR	NFKBIA	9606.ENSP00000275493	9606.ENSP00000216797	0	0	0	0	0	0.176	0	0.389	0.475
EGFR	PLCB2	9606.ENSP00000275493	9606.ENSP00000260402	0	0	0	0	0	0.092	0.6	0.108	0.648
EGFR	TCIRG1	9606.ENSP00000275493	9606.ENSP00000265686	0	0	0	0	0	0.099	0.8	0.073	0.818
EGFR	RAD51	9606.ENSP00000275493	9606.ENSP00000372088	0	0	0	0	0	0	0	0.411	0.41
EGFR	MET	9606.ENSP00000275493	9606.ENSP00000317272	0	0	0	0.58	0.229	0.418	0	0.933	0.715
EGFR	IVNS1ABP	9606.ENSP00000275493	9606.ENSP00000356468	0	0	0	0	0	0.742	0	0	0.742
EGFR	TJP1	9606.ENSP00000275493	9606.ENSP00000281537	0	0	0	0	0.251	0.379	0	0.5	0.747
EGFR	EML4	9606.ENSP00000275493	9606.ENSP00000320663	0	0	0	0	0.062	0.081	0	0.831	0.841
EGFR	MYC	9606.ENSP00000275493	9606.ENSP00000479618	0	0	0	0	0	0	0	0.871	0.872
EGFR	JUN	9606.ENSP00000275493	9606.ENSP00000360266	0	0	0	0	0.06	0.185	0	0.856	0.88
EGFR	LYN	9606.ENSP00000275493	9606.ENSP00000428924	0	0	0	0.679	0	0.431	0.9	0.735	0.954
EGFR	STAT1	9606.ENSP00000275493	9606.ENSP00000354394	0	0	0	0	0.061	0.42	0.9	0.764	0.985
EME1	PLK1	9606.ENSP00000376952	9606.ENSP00000300093	0	0	0	0	0.279	0	0	0.779	0.834
EME1	RAD51	9606.ENSP00000376952	9606.ENSP00000372088	0	0	0	0	0.254	0	0.9	0.839	0.986
EME1	UHRF1	9606.ENSP00000376952	9606.ENSP00000479617	0	0	0	0	0.224	0.393	0	0.526	0.758
EML4	MET	9606.ENSP00000320663	9606.ENSP00000317272	0	0	0	0	0.064	0.082	0	0.63	0.654
ESCO2	NCAPH	9606.ENSP00000306999	9606.ENSP00000240423	0	0	0	0	0.575	0	0	0.136	0.617
ESCO2	MCM4	9606.ENSP00000306999	9606.ENSP00000262105	0	0	0	0	0.621	0.184	0	0.159	0.717
ESCO2	PLK1	9606.ENSP00000306999	9606.ENSP00000300093	0	0	0	0	0.692	0	0	0.244	0.757
ESCO2	PHF21A	9606.ENSP00000306999	9606.ENSP00000398824	0	0	0	0	0.062	0.394	0	0.098	0.442
ESCO2	KIF4A	9606.ENSP00000306999	9606.ENSP00000363524	0	0	0	0	0.445	0.053	0	0.043	0.453
ESCO2	NCAPD3	9606.ENSP00000306999	9606.ENSP00000433681	0	0	0	0	0.48	0.116	0	0.103	0.552
ESCO2	RAD51	9606.ENSP00000306999	9606.ENSP00000372088	0	0	0	0	0.57	0	0	0.239	0.659
ESCO2	UHRF1	9606.ENSP00000306999	9606.ENSP00000479617	0	0	0	0	0.702	0	0	0	0.702
ESCO2	WDHD1	9606.ENSP00000306999	9606.ENSP00000353793	0	0	0	0	0.266	0.157	0	0.567	0.709
ESCO2	RRM2	9606.ENSP00000306999	9606.ENSP00000353770	0	0	0	0	0.733	0	0	0.082	0.744
ESCO2	HELLS	9606.ENSP00000306999	9606.ENSP00000377601	0	0	0	0	0.704	0.125	0	0.184	0.771
ESCO2	KIF15	9606.ENSP00000306999	9606.ENSP00000324020	0	0	0	0	0.783	0.053	0	0.069	0.792
F11R	TJP1	9606.ENSP00000357005	9606.ENSP00000281537	0	0	0	0	0.063	0.379	0.8	0.885	0.984
F11R	JAM3	9606.ENSP00000357005	9606.ENSP00000299106	0	0	0	0.824	0	0	0.8	0.811	0.828
F11R	JAM2	9606.ENSP00000357005	9606.ENSP00000383376	0	0	0	0.814	0.055	0.412	0.8	0.806	0.897
FBXL20	ZNRF1	9606.ENSP00000264658	9606.ENSP00000335091	0	0	0	0	0.063	0	0.9	0	0.902
FOSB	PHF21A	9606.ENSP00000245919	9606.ENSP00000398824	0	0	0	0	0	0.186	0	0.3	0.406
FOSB	MAPK10	9606.ENSP00000245919	9606.ENSP00000352157	0	0	0	0	0	0.26	0.6	0.194	0.74
FOSB	NR4A1	9606.ENSP00000245919	9606.ENSP00000440864	0	0	0	0	0.564	0	0	0.664	0.847
FOSB	MYC	9606.ENSP00000245919	9606.ENSP00000479618	0	0	0	0	0	0	0.9	0.404	0.937
FOSB	JUN	9606.ENSP00000245919	9606.ENSP00000360266	0	0	0	0	0.551	0.539	0.9	0.906	0.997
GBP4	STAT1	9606.ENSP00000359490	9606.ENSP00000354394	0	0	0	0	0.228	0	0	0.358	0.484
GPR132	PLCB2	9606.ENSP00000328818	9606.ENSP00000260402	0	0	0	0	0.116	0	0.9	0	0.907
GPR132	JUN	9606.ENSP00000328818	9606.ENSP00000360266	0	0	0	0	0	0	0	0.456	0.456
HELLS	NCAPH	9606.ENSP00000377601	9606.ENSP00000240423	0	0	0	0	0.396	0.064	0	0.172	0.491
HELLS	MCM4	9606.ENSP00000377601	9606.ENSP00000262105	0	0	0	0	0.755	0.157	0	0.071	0.792
HELLS	KIF15	9606.ENSP00000377601	9606.ENSP00000324020	0	0	0	0	0.65	0.056	0	0	0.656
HELLS	RRM2	9606.ENSP00000377601	9606.ENSP00000353770	0	0	0	0	0.622	0.05	0	0.187	0.682
HELLS	WDHD1	9606.ENSP00000377601	9606.ENSP00000353793	0	0	0	0	0.608	0.132	0	0.13	0.678
HELLS	KIF4A	9606.ENSP00000377601	9606.ENSP00000363524	0	0	0	0	0.408	0.056	0	0.12	0.466
HELLS	RAD51	9606.ENSP00000377601	9606.ENSP00000372088	0	0	0	0	0.536	0.193	0	0.439	0.772
HELLS	MYC	9606.ENSP00000377601	9606.ENSP00000479618	0	0	0	0	0.078	0.14	0	0.515	0.582
HELLS	UHRF1	9606.ENSP00000377601	9606.ENSP00000479617	0.053	0	0	0	0.664	0	0	0.445	0.808
ING4	MYC	9606.ENSP00000380024	9606.ENSP00000479618	0	0	0	0	0	0.379	0	0.544	0.704
JAM2	TJP1	9606.ENSP00000383376	9606.ENSP00000281537	0	0	0	0	0	0.328	0.8	0.529	0.931
JAM2	PKNOX1	9606.ENSP00000383376	9606.ENSP00000291547	0	0	0	0	0	0	0	0.573	0.573
JAM2	JAM3	9606.ENSP00000383376	9606.ENSP00000299106	0	0	0	0.84	0.078	0.591	0.9	0.949	0.965
JAM3	TJP1	9606.ENSP00000299106	9606.ENSP00000281537	0	0	0	0	0.062	0.328	0.8	0.566	0.938
JUN	NFKBIA	9606.ENSP00000360266	9606.ENSP00000216797	0	0	0	0	0.125	0	0.9	0.671	0.968
JUN	MET	9606.ENSP00000360266	9606.ENSP00000317272	0	0	0	0	0	0.157	0	0.454	0.52
JUN	MYB	9606.ENSP00000360266	9606.ENSP00000339992	0	0	0	0	0	0.13	0	0.616	0.652
JUN	MAPK10	9606.ENSP00000360266	9606.ENSP00000352157	0	0	0	0	0	0.788	0.9	0.919	0.998
JUN	RRM2	9606.ENSP00000360266	9606.ENSP00000353770	0	0	0	0	0	0	0	0.48	0.48
JUN	STAT1	9606.ENSP00000360266	9606.ENSP00000354394	0	0	0	0	0	0.465	0	0.798	0.888
JUN	NR4A1	9606.ENSP00000360266	9606.ENSP00000440864	0	0	0	0	0.134	0	0	0.564	0.607
JUN	LYN	9606.ENSP00000360266	9606.ENSP00000428924	0	0	0	0	0	0.079	0.9	0.447	0.944
JUN	MYC	9606.ENSP00000360266	9606.ENSP00000479618	0	0	0	0	0.063	0.379	0.9	0.878	0.992
KIF15	NCAPH	9606.ENSP00000324020	9606.ENSP00000240423	0	0	0	0	0.918	0	0	0.267	0.937
KIF15	MCM4	9606.ENSP00000324020	9606.ENSP00000262105	0	0	0	0	0.594	0	0	0.068	0.606
KIF15	PLK1	9606.ENSP00000324020	9606.ENSP00000300093	0	0	0	0	0.603	0.171	0	0.61	0.86
KIF15	UHRF1	9606.ENSP00000324020	9606.ENSP00000479617	0	0	0	0	0.508	0	0	0.151	0.564
KIF15	RAD51	9606.ENSP00000324020	9606.ENSP00000372088	0	0	0	0	0.609	0	0	0.121	0.641
KIF15	WDHD1	9606.ENSP00000324020	9606.ENSP00000353793	0	0	0	0	0.735	0.05	0	0.114	0.757
KIF15	RRM2	9606.ENSP00000324020	9606.ENSP00000353770	0	0	0	0	0.889	0	0	0.154	0.902
KIF15	KIF4A	9606.ENSP00000324020	9606.ENSP00000363524	0	0	0	0.633	0.864	0	0.9	0.741	0.989
KIF4A	NCAPH	9606.ENSP00000363524	9606.ENSP00000240423	0	0	0	0	0.878	0	0	0.68	0.959
KIF4A	MCM4	9606.ENSP00000363524	9606.ENSP00000262105	0	0	0	0	0.872	0	0	0.246	0.899
KIF4A	PLK1	9606.ENSP00000363524	9606.ENSP00000300093	0	0	0	0	0.901	0.171	0	0.615	0.965
KIF4A	RRM2	9606.ENSP00000363524	9606.ENSP00000353770	0	0	0	0	0.812	0	0	0.251	0.853
KIF4A	WDHD1	9606.ENSP00000363524	9606.ENSP00000353793	0	0	0	0	0.649	0.05	0	0.054	0.657
KIF4A	NCAPD3	9606.ENSP00000363524	9606.ENSP00000433681	0	0	0	0	0.372	0	0	0.308	0.547
KIF4A	UHRF1	9606.ENSP00000363524	9606.ENSP00000479617	0	0	0	0	0.531	0	0	0.2	0.609
KIF4A	RAD51	9606.ENSP00000363524	9606.ENSP00000372088	0	0	0	0	0.501	0	0	0.292	0.631
LYN	RASGRP1	9606.ENSP00000428924	9606.ENSP00000310244	0	0	0	0	0.061	0.123	0	0.372	0.438
LYN	PDE4D	9606.ENSP00000428924	9606.ENSP00000345502	0	0	0	0	0.05	0.32	0	0.178	0.422
LYN	STAT1	9606.ENSP00000428924	9606.ENSP00000354394	0	0	0	0	0.063	0.124	0.9	0.404	0.944
LYN	RASGRP3	9606.ENSP00000428924	9606.ENSP00000384192	0	0	0	0	0.061	0.123	0	0.392	0.456
LYN	MYC	9606.ENSP00000428924	9606.ENSP00000479618	0	0	0	0	0.05	0.061	0	0.418	0.435
MAP3K14	NFKBIA	9606.ENSP00000482657	9606.ENSP00000216797	0	0	0	0	0.061	0.339	0	0.426	0.613
MAPK10	NFKBIA	9606.ENSP00000352157	9606.ENSP00000216797	0	0	0	0	0	0.261	0	0.266	0.434
MAPK10	PTPN7	9606.ENSP00000352157	9606.ENSP00000309116	0	0	0	0	0	0	0.6	0.049	0.603
MAPK10	STAT1	9606.ENSP00000352157	9606.ENSP00000354394	0	0	0	0	0	0	0	0.484	0.484
MAPK10	MYC	9606.ENSP00000352157	9606.ENSP00000479618	0	0	0	0	0	0	0	0.512	0.512
MAPK10	WDR62	9606.ENSP00000352157	9606.ENSP00000384792	0	0	0	0	0.056	0.458	0	0.191	0.551
MBNL1	PHF21A	9606.ENSP00000282486	9606.ENSP00000398824	0	0	0	0	0.061	0	0	0.475	0.486
MCM4	NCAPH	9606.ENSP00000262105	9606.ENSP00000240423	0	0	0	0	0.893	0	0	0.256	0.917
MCM4	PIF1	9606.ENSP00000262105	9606.ENSP00000328174	0	0	0	0	0.2	0	0	0.281	0.4
MCM4	MYC	9606.ENSP00000262105	9606.ENSP00000479618	0	0	0	0	0.096	0.099	0	0.399	0.467
MCM4	NCAPD3	9606.ENSP00000262105	9606.ENSP00000433681	0	0	0	0	0.733	0	0	0.123	0.756
MCM4	UHRF1	9606.ENSP00000262105	9606.ENSP00000479617	0	0	0	0	0.74	0	0	0.197	0.783
MCM4	RAD51	9606.ENSP00000262105	9606.ENSP00000372088	0	0	0	0	0.564	0.261	0	0.561	0.846
MCM4	PLK1	9606.ENSP00000262105	9606.ENSP00000300093	0	0	0	0	0.732	0.118	0	0.463	0.862
MCM4	RRM2	9606.ENSP00000262105	9606.ENSP00000353770	0	0	0	0	0.932	0	0	0.348	0.954
MCM4	WDHD1	9606.ENSP00000262105	9606.ENSP00000353793	0	0	0	0	0.912	0.409	0	0.752	0.986
MET	PLXNC1	9606.ENSP00000317272	9606.ENSP00000258526	0	0	0	0	0.049	0.085	0	0.42	0.451
MET	PLCB2	9606.ENSP00000317272	9606.ENSP00000260402	0	0	0	0	0	0.185	0.6	0.042	0.66
MET	MYC	9606.ENSP00000317272	9606.ENSP00000479618	0	0	0	0	0.05	0.157	0	0.582	0.636
MYB	ZMYND11	9606.ENSP00000339992	9606.ENSP00000381053	0	0	0	0	0.063	0.379	0	0.129	0.449
MYB	MYC	9606.ENSP00000339992	9606.ENSP00000479618	0	0	0	0	0.076	0.313	0	0.716	0.804
MYC	NFKBIA	9606.ENSP00000479618	9606.ENSP00000216797	0	0	0	0	0.057	0	0.9	0.445	0.943
MYC	TJP1	9606.ENSP00000479618	9606.ENSP00000281537	0	0	0	0	0	0	0	0.479	0.479
MYC	THY1	9606.ENSP00000479618	9606.ENSP00000284240	0	0	0	0	0	0	0	0.448	0.448
MYC	PLK1	9606.ENSP00000479618	9606.ENSP00000300093	0	0	0	0	0.098	0.379	0	0.73	0.836
MYC	RRM2	9606.ENSP00000479618	9606.ENSP00000353770	0	0	0	0	0.111	0	0	0.417	0.459
MYC	STAT1	9606.ENSP00000479618	9606.ENSP00000354394	0	0	0	0	0	0	0	0.667	0.667
MYC	RAD51	9606.ENSP00000479618	9606.ENSP00000372088	0	0	0	0	0.076	0	0	0.526	0.543
MYC	SLC1A5	9606.ENSP00000479618	9606.ENSP00000444408	0	0	0	0	0.167	0	0	0.695	0.735
NCAPD3	NCAPH	9606.ENSP00000433681	9606.ENSP00000240423	0	0	0	0	0.426	0.176	0.9	0.894	0.994
NCAPD3	PLK1	9606.ENSP00000433681	9606.ENSP00000300093	0	0	0	0	0.683	0	0.9	0.316	0.976
NCAPD3	WDHD1	9606.ENSP00000433681	9606.ENSP00000353793	0	0	0	0	0.413	0	0	0	0.413
NCAPH	RAD51	9606.ENSP00000240423	9606.ENSP00000372088	0	0	0	0	0.616	0	0	0	0.616
NCAPH	UHRF1	9606.ENSP00000240423	9606.ENSP00000479617	0	0	0	0	0.651	0	0	0.08	0.666
NCAPH	WDHD1	9606.ENSP00000240423	9606.ENSP00000353793	0	0	0	0	0.729	0.057	0	0.058	0.738
NCAPH	RRM2	9606.ENSP00000240423	9606.ENSP00000353770	0	0	0	0	0.711	0	0	0.164	0.748
NCAPH	PLK1	9606.ENSP00000240423	9606.ENSP00000300093	0	0	0	0	0.707	0	0	0.483	0.842
NDC1	RRM2	9606.ENSP00000360483	9606.ENSP00000353770	0	0	0	0	0.521	0	0	0	0.521
NFKBIA	STAT1	9606.ENSP00000216797	9606.ENSP00000354394	0	0	0	0	0.061	0.321	0	0.456	0.623
NLRC5	STAT1	9606.ENSP00000262510	9606.ENSP00000354394	0	0	0	0	0.1	0	0	0.387	0.424
NR4A1	SETBP1	9606.ENSP00000440864	9606.ENSP00000282030	0	0	0	0	0	0	0	0.448	0.448
PDE4D	PRKAR2B	9606.ENSP00000345502	9606.ENSP00000265717	0	0	0	0	0.146	0.157	0	0.311	0.46
PIF1	PLK1	9606.ENSP00000328174	9606.ENSP00000300093	0	0	0	0	0.348	0	0	0.189	0.449
PIF1	RRM2	9606.ENSP00000328174	9606.ENSP00000353770	0	0	0	0	0.19	0	0	0.3	0.409
PIF1	WDHD1	9606.ENSP00000328174	9606.ENSP00000353793	0	0	0	0	0.209	0.262	0	0.506	0.686
PIF1	RAD51	9606.ENSP00000328174	9606.ENSP00000372088	0.042	0	0	0	0.199	0.374	0	0.83	0.907
PLK1	PRKAR2B	9606.ENSP00000300093	9606.ENSP00000265717	0	0	0	0	0	0	0.9	0.063	0.902
PLK1	WDHD1	9606.ENSP00000300093	9606.ENSP00000353793	0	0	0	0	0.368	0	0	0.151	0.441
PLK1	UHRF1	9606.ENSP00000300093	9606.ENSP00000479617	0	0	0	0	0.704	0	0	0.223	0.76
PLK1	RRM2	9606.ENSP00000300093	9606.ENSP00000353770	0	0	0	0	0.748	0.387	0	0.451	0.907
PLK1	RAD51	9606.ENSP00000300093	9606.ENSP00000372088	0	0	0	0	0.603	0.157	0	0.795	0.925
RAD51	RRM2	9606.ENSP00000372088	9606.ENSP00000353770	0	0	0	0	0.689	0.05	0	0.464	0.828
RAD51	WDHD1	9606.ENSP00000372088	9606.ENSP00000353793	0	0	0	0	0.458	0.575	0	0.59	0.897
RAD51	UHRF1	9606.ENSP00000372088	9606.ENSP00000479617	0	0	0	0	0.506	0	0	0.164	0.57
RASGRP1	RASGRP3	9606.ENSP00000310244	9606.ENSP00000384192	0	0	0	0.943	0.061	0	0.9	0.788	0.906
RRM2	WDHD1	9606.ENSP00000353770	9606.ENSP00000353793	0	0	0	0	0.738	0	0	0	0.738
RRM2	UHRF1	9606.ENSP00000353770	9606.ENSP00000479617	0	0	0	0	0.77	0	0	0.256	0.822
STAT1	XAF1	9606.ENSP00000354394	9606.ENSP00000354822	0	0	0	0	0.681	0	0	0.623	0.874
UHRF1	WDHD1	9606.ENSP00000479617	9606.ENSP00000353793	0	0	0	0	0.372	0	0	0.085	0.401

## Sheet: Table S8
	Table S8. Details for Epithelial cell signaling in Helicobacter pylori infection lncRNA regulatory pattern.
lncRNAid	lncRNAname	miRNAid	miRNAname	ENTREZID	ENSEMBL	genename
ENSG00000093100.13	XXbac-B461K10.4	MIMAT0000073	hsa-miR-19a-3p	5602	ENSG00000109339	MAPK10
ENSG00000093100.13	XXbac-B461K10.4	MIMAT0000073	hsa-miR-19a-3p	3576	ENSG00000169429	CXCL8
ENSG00000093100.13	XXbac-B461K10.4	MIMAT0000073	hsa-miR-19a-3p	9020	ENSG00000282637	MAP3K14
ENSG00000093100.13	XXbac-B461K10.4	MIMAT0000073	hsa-miR-19a-3p	4067	ENSG00000254087	LYN
ENSG00000093100.13	XXbac-B461K10.4	MIMAT0000073	hsa-miR-19a-3p	4233	ENSG00000105976	MET
ENSG00000093100.13	XXbac-B461K10.4	MIMAT0000073	hsa-miR-19a-3p	9020	ENSG00000006062	MAP3K14
ENSG00000152931.7	PART1	MIMAT0000687	hsa-miR-299-3p	9020	ENSG00000282637	MAP3K14
ENSG00000152931.7	PART1	MIMAT0000687	hsa-miR-299-3p	1956	ENSG00000146648	EGFR
ENSG00000152931.7	PART1	MIMAT0000687	hsa-miR-299-3p	9020	ENSG00000006062	MAP3K14
ENSG00000152931.7	PART1	MIMAT0000687	hsa-miR-299-3p	4792	ENSG00000100906	NFKBIA
ENSG00000153363.11	LINC00467	MIMAT0000068	hsa-miR-15a-5p	10312	ENSG00000110719	TCIRG1
ENSG00000153363.11	LINC00467	MIMAT0000068	hsa-miR-15a-5p	9020	ENSG00000006062	MAP3K14
ENSG00000153363.11	LINC00467	MIMAT0000068	hsa-miR-15a-5p	83700	ENSG00000166086	JAM3
ENSG00000153363.11	LINC00467	MIMAT0000068	hsa-miR-15a-5p	9020	ENSG00000282637	MAP3K14
ENSG00000153363.11	LINC00467	MIMAT0000068	hsa-miR-15a-5p	1956	ENSG00000146648	EGFR
ENSG00000153363.11	LINC00467	MIMAT0000068	hsa-miR-15a-5p	50848	ENSG00000158769	F11R
ENSG00000162888.4	C1orf147	MIMAT0004748	hsa-miR-423-5p	1956	ENSG00000146648	EGFR
ENSG00000173811.9	CCDC13-AS1	MIMAT0000250	hsa-miR-139-5p	4233	ENSG00000105976	MET
ENSG00000173811.9	CCDC13-AS1	MIMAT0000250	hsa-miR-139-5p	9020	ENSG00000006062	MAP3K14
ENSG00000173811.9	CCDC13-AS1	MIMAT0000250	hsa-miR-139-5p	9020	ENSG00000282637	MAP3K14
ENSG00000173811.9	CCDC13-AS1	MIMAT0000250	hsa-miR-139-5p	83700	ENSG00000166086	JAM3
ENSG00000173811.9	CCDC13-AS1	MIMAT0000250	hsa-miR-139-5p	50848	ENSG00000158769	F11R
ENSG00000173811.9	CCDC13-AS1	MIMAT0000250	hsa-miR-139-5p	3725	ENSG00000177606	JUN
ENSG00000175772.10	LINC01106	MIMAT0000242	hsa-miR-129-5p	4067	ENSG00000254087	LYN
ENSG00000175772.10	LINC01106	MIMAT0000242	hsa-miR-129-5p	3576	ENSG00000169429	CXCL8
ENSG00000175772.10	LINC01106	MIMAT0000242	hsa-miR-129-5p	1956	ENSG00000146648	EGFR
ENSG00000175772.10	LINC01106	MIMAT0000242	hsa-miR-129-5p	4233	ENSG00000105976	MET
ENSG00000175772.10	LINC01106	MIMAT0000242	hsa-miR-129-5p	4792	ENSG00000100906	NFKBIA
ENSG00000175772.10	LINC01106	MIMAT0000242	hsa-miR-129-5p	50848	ENSG00000158769	F11R
ENSG00000176912.3	TYMSOS	MIMAT0000226	hsa-miR-196a-5p	4792	ENSG00000100906	NFKBIA
ENSG00000176912.3	TYMSOS	MIMAT0000226	hsa-miR-196a-5p	7082	ENSG00000104067	TJP1
ENSG00000176912.3	TYMSOS	MIMAT0000226	hsa-miR-196a-5p	7082	ENSG00000277401	TJP1
ENSG00000176912.3	TYMSOS	MIMAT0000226	hsa-miR-196a-5p	2919	ENSG00000163739	CXCL1
ENSG00000179818.12	PCBP1-AS1	MIMAT0000433	hsa-miR-142-5p	1956	ENSG00000146648	EGFR
ENSG00000179818.12	PCBP1-AS1	MIMAT0000433	hsa-miR-142-5p	3576	ENSG00000169429	CXCL8
ENSG00000180422.3	LINC00304	MIMAT0000451	hsa-miR-150-5p	9020	ENSG00000006062	MAP3K14
ENSG00000180422.3	LINC00304	MIMAT0000451	hsa-miR-150-5p	51382	ENSG00000100554	ATP6V1D
ENSG00000180422.3	LINC00304	MIMAT0000451	hsa-miR-150-5p	4233	ENSG00000105976	MET
ENSG00000180422.3	LINC00304	MIMAT0000451	hsa-miR-150-5p	9020	ENSG00000282637	MAP3K14
ENSG00000182912.6	TSPEAR-AS2	MIMAT0000242	hsa-miR-129-5p	50848	ENSG00000158769	F11R
ENSG00000182912.6	TSPEAR-AS2	MIMAT0000242	hsa-miR-129-5p	1956	ENSG00000146648	EGFR
ENSG00000182912.6	TSPEAR-AS2	MIMAT0000242	hsa-miR-129-5p	4792	ENSG00000100906	NFKBIA
ENSG00000182912.6	TSPEAR-AS2	MIMAT0000242	hsa-miR-129-5p	3576	ENSG00000169429	CXCL8
ENSG00000182912.6	TSPEAR-AS2	MIMAT0000242	hsa-miR-129-5p	4233	ENSG00000105976	MET
ENSG00000182912.6	TSPEAR-AS2	MIMAT0000242	hsa-miR-129-5p	4067	ENSG00000254087	LYN
ENSG00000185186.7	LINC00313	MIMAT0000068	hsa-miR-15a-5p	9020	ENSG00000006062	MAP3K14
ENSG00000185186.7	LINC00313	MIMAT0000068	hsa-miR-15a-5p	10312	ENSG00000110719	TCIRG1
ENSG00000185186.7	LINC00313	MIMAT0000068	hsa-miR-15a-5p	83700	ENSG00000166086	JAM3
ENSG00000185186.7	LINC00313	MIMAT0000068	hsa-miR-15a-5p	50848	ENSG00000158769	F11R
ENSG00000185186.7	LINC00313	MIMAT0000068	hsa-miR-15a-5p	9020	ENSG00000282637	MAP3K14
ENSG00000185186.7	LINC00313	MIMAT0000068	hsa-miR-15a-5p	1956	ENSG00000146648	EGFR
ENSG00000187621.13	TCL6	MIMAT0000073	hsa-miR-19a-3p	9020	ENSG00000282637	MAP3K14
ENSG00000187621.13	TCL6	MIMAT0000073	hsa-miR-19a-3p	9020	ENSG00000006062	MAP3K14
ENSG00000187621.13	TCL6	MIMAT0000073	hsa-miR-19a-3p	5602	ENSG00000109339	MAPK10
ENSG00000187621.13	TCL6	MIMAT0000073	hsa-miR-19a-3p	4233	ENSG00000105976	MET
ENSG00000187621.13	TCL6	MIMAT0000073	hsa-miR-19a-3p	3576	ENSG00000169429	CXCL8
ENSG00000187621.13	TCL6	MIMAT0000073	hsa-miR-19a-3p	4067	ENSG00000254087	LYN
ENSG00000196167.8	COLCA1	MIMAT0000756	hsa-miR-326	9020	ENSG00000282637	MAP3K14
ENSG00000196167.8	COLCA1	MIMAT0000756	hsa-miR-326	83700	ENSG00000166086	JAM3
ENSG00000196167.8	COLCA1	MIMAT0000756	hsa-miR-326	9020	ENSG00000006062	MAP3K14
ENSG00000196167.8	COLCA1	MIMAT0000756	hsa-miR-326	50848	ENSG00000158769	F11R
ENSG00000196167.8	COLCA1	MIMAT0000756	hsa-miR-326	4233	ENSG00000105976	MET
ENSG00000196167.8	COLCA1	MIMAT0000756	hsa-miR-326	1956	ENSG00000146648	EGFR
ENSG00000196366.3	C9orf163	MIMAT0000279	hsa-miR-222-3p	4067	ENSG00000254087	LYN
ENSG00000196366.3	C9orf163	MIMAT0000279	hsa-miR-222-3p	1956	ENSG00000146648	EGFR
ENSG00000196366.3	C9orf163	MIMAT0000279	hsa-miR-222-3p	83700	ENSG00000166086	JAM3
ENSG00000197813.5	CTC-301O7.4	MIMAT0000087	hsa-miR-30a-5p	3725	ENSG00000177606	JUN
ENSG00000197813.5	CTC-301O7.4	MIMAT0000087	hsa-miR-30a-5p	1956	ENSG00000146648	EGFR
ENSG00000197813.5	CTC-301O7.4	MIMAT0000087	hsa-miR-30a-5p	83700	ENSG00000166086	JAM3
ENSG00000197813.5	CTC-301O7.4	MIMAT0000087	hsa-miR-30a-5p	4067	ENSG00000254087	LYN
ENSG00000203709.8	C1orf132	MIMAT0000073	hsa-miR-19a-3p	4067	ENSG00000254087	LYN
ENSG00000203709.8	C1orf132	MIMAT0000073	hsa-miR-19a-3p	5602	ENSG00000109339	MAPK10
ENSG00000203709.8	C1orf132	MIMAT0000073	hsa-miR-19a-3p	3576	ENSG00000169429	CXCL8
ENSG00000203709.8	C1orf132	MIMAT0000073	hsa-miR-19a-3p	9020	ENSG00000282637	MAP3K14
ENSG00000203709.8	C1orf132	MIMAT0000073	hsa-miR-19a-3p	9020	ENSG00000006062	MAP3K14
ENSG00000203709.8	C1orf132	MIMAT0000073	hsa-miR-19a-3p	4233	ENSG00000105976	MET
ENSG00000203930.9	LINC00632	MIMAT0001340	hsa-miR-423-3p	9020	ENSG00000006062	MAP3K14
ENSG00000203930.9	LINC00632	MIMAT0001340	hsa-miR-423-3p	9020	ENSG00000282637	MAP3K14
ENSG00000204832.8	ST8SIA6-AS1	MIMAT0000068	hsa-miR-15a-5p	50848	ENSG00000158769	F11R
ENSG00000204832.8	ST8SIA6-AS1	MIMAT0000068	hsa-miR-15a-5p	9020	ENSG00000006062	MAP3K14
ENSG00000204832.8	ST8SIA6-AS1	MIMAT0000068	hsa-miR-15a-5p	1956	ENSG00000146648	EGFR
ENSG00000204832.8	ST8SIA6-AS1	MIMAT0000068	hsa-miR-15a-5p	83700	ENSG00000166086	JAM3
ENSG00000204832.8	ST8SIA6-AS1	MIMAT0000068	hsa-miR-15a-5p	9020	ENSG00000282637	MAP3K14
ENSG00000204832.8	ST8SIA6-AS1	MIMAT0000068	hsa-miR-15a-5p	10312	ENSG00000110719	TCIRG1
ENSG00000204860.4	FAM201A	MIMAT0000099	hsa-miR-101-3p	4233	ENSG00000105976	MET
ENSG00000204860.4	FAM201A	MIMAT0000099	hsa-miR-101-3p	7082	ENSG00000277401	TJP1
ENSG00000204860.4	FAM201A	MIMAT0000099	hsa-miR-101-3p	3576	ENSG00000169429	CXCL8
ENSG00000204860.4	FAM201A	MIMAT0000099	hsa-miR-101-3p	51382	ENSG00000100554	ATP6V1D
ENSG00000204860.4	FAM201A	MIMAT0000099	hsa-miR-101-3p	83700	ENSG00000166086	JAM3
ENSG00000204860.4	FAM201A	MIMAT0000099	hsa-miR-101-3p	50848	ENSG00000158769	F11R
ENSG00000204860.4	FAM201A	MIMAT0000099	hsa-miR-101-3p	1956	ENSG00000146648	EGFR
ENSG00000204860.4	FAM201A	MIMAT0000099	hsa-miR-101-3p	7082	ENSG00000104067	TJP1
ENSG00000204860.4	FAM201A	MIMAT0000099	hsa-miR-101-3p	3725	ENSG00000177606	JUN
ENSG00000205664.9	RP11-706O15.1	MIMAT0000089	hsa-miR-31-5p	9020	ENSG00000006062	MAP3K14
ENSG00000205664.9	RP11-706O15.1	MIMAT0000089	hsa-miR-31-5p	4233	ENSG00000105976	MET
ENSG00000205664.9	RP11-706O15.1	MIMAT0000089	hsa-miR-31-5p	9020	ENSG00000282637	MAP3K14
ENSG00000205664.9	RP11-706O15.1	MIMAT0000089	hsa-miR-31-5p	83700	ENSG00000166086	JAM3
ENSG00000205885.6	C1RL-AS1	MIMAT0000278	hsa-miR-221-3p	1956	ENSG00000146648	EGFR
ENSG00000205885.6	C1RL-AS1	MIMAT0000278	hsa-miR-221-3p	83700	ENSG00000166086	JAM3
ENSG00000205885.6	C1RL-AS1	MIMAT0000278	hsa-miR-221-3p	4067	ENSG00000254087	LYN
ENSG00000205930.7	C21orf62-AS1	MIMAT0000068	hsa-miR-15a-5p	9020	ENSG00000282637	MAP3K14
ENSG00000205930.7	C21orf62-AS1	MIMAT0000068	hsa-miR-15a-5p	10312	ENSG00000110719	TCIRG1
ENSG00000205930.7	C21orf62-AS1	MIMAT0000068	hsa-miR-15a-5p	9020	ENSG00000006062	MAP3K14
ENSG00000205930.7	C21orf62-AS1	MIMAT0000068	hsa-miR-15a-5p	1956	ENSG00000146648	EGFR
ENSG00000205930.7	C21orf62-AS1	MIMAT0000068	hsa-miR-15a-5p	50848	ENSG00000158769	F11R
ENSG00000205930.7	C21orf62-AS1	MIMAT0000068	hsa-miR-15a-5p	83700	ENSG00000166086	JAM3
ENSG00000206195.9	DUXAP8	MIMAT0004688	hsa-miR-374a-3p	4233	ENSG00000105976	MET
ENSG00000206337.9	HCP5	MIMAT0000275	hsa-miR-218-5p	1956	ENSG00000146648	EGFR
ENSG00000206337.9	HCP5	MIMAT0000275	hsa-miR-218-5p	9020	ENSG00000006062	MAP3K14
ENSG00000206337.9	HCP5	MIMAT0000275	hsa-miR-218-5p	9020	ENSG00000282637	MAP3K14
ENSG00000206337.9	HCP5	MIMAT0000275	hsa-miR-218-5p	83700	ENSG00000166086	JAM3
ENSG00000206567.8	AC022007.5	MIMAT0000451	hsa-miR-150-5p	51382	ENSG00000100554	ATP6V1D
ENSG00000206567.8	AC022007.5	MIMAT0000451	hsa-miR-150-5p	9020	ENSG00000006062	MAP3K14
ENSG00000206567.8	AC022007.5	MIMAT0000451	hsa-miR-150-5p	9020	ENSG00000282637	MAP3K14
ENSG00000206567.8	AC022007.5	MIMAT0000451	hsa-miR-150-5p	4233	ENSG00000105976	MET
ENSG00000213468.3	FIRRE	MIMAT0002175	hsa-miR-485-5p	83700	ENSG00000166086	JAM3
ENSG00000213468.3	FIRRE	MIMAT0002175	hsa-miR-485-5p	4233	ENSG00000105976	MET
ENSG00000213468.3	FIRRE	MIMAT0002175	hsa-miR-485-5p	9020	ENSG00000282637	MAP3K14
ENSG00000213468.3	FIRRE	MIMAT0002175	hsa-miR-485-5p	9020	ENSG00000006062	MAP3K14
ENSG00000214039.7	RP11-474D1.3	MIMAT0000095	hsa-miR-96-5p	51382	ENSG00000100554	ATP6V1D
ENSG00000214039.7	RP11-474D1.3	MIMAT0000095	hsa-miR-96-5p	50848	ENSG00000158769	F11R
ENSG00000214039.7	RP11-474D1.3	MIMAT0000095	hsa-miR-96-5p	9020	ENSG00000006062	MAP3K14
ENSG00000214039.7	RP11-474D1.3	MIMAT0000095	hsa-miR-96-5p	9020	ENSG00000282637	MAP3K14
ENSG00000214039.7	RP11-474D1.3	MIMAT0000095	hsa-miR-96-5p	4233	ENSG00000105976	MET
ENSG00000214248.2	CTD-3193O13.12	MIMAT0000460	hsa-miR-194-5p	1956	ENSG00000146648	EGFR
ENSG00000214248.2	CTD-3193O13.12	MIMAT0000460	hsa-miR-194-5p	4792	ENSG00000100906	NFKBIA
ENSG00000214248.2	CTD-3193O13.12	MIMAT0000460	hsa-miR-194-5p	51382	ENSG00000100554	ATP6V1D
ENSG00000214248.2	CTD-3193O13.12	MIMAT0000460	hsa-miR-194-5p	7082	ENSG00000104067	TJP1
ENSG00000214248.2	CTD-3193O13.12	MIMAT0000460	hsa-miR-194-5p	7082	ENSG00000277401	TJP1
ENSG00000214797.3	RP11-1036E20.9	MIMAT0000253	hsa-miR-10a-5p	50848	ENSG00000158769	F11R
ENSG00000214797.3	RP11-1036E20.9	MIMAT0000253	hsa-miR-10a-5p	3576	ENSG00000169429	CXCL8
ENSG00000214797.3	RP11-1036E20.9	MIMAT0000253	hsa-miR-10a-5p	4233	ENSG00000105976	MET
ENSG00000214797.3	RP11-1036E20.9	MIMAT0000253	hsa-miR-10a-5p	83700	ENSG00000166086	JAM3
ENSG00000214999.3	AC129492.6	MIMAT0002874	hsa-miR-503-5p	83700	ENSG00000166086	JAM3
ENSG00000214999.3	AC129492.6	MIMAT0002874	hsa-miR-503-5p	50848	ENSG00000158769	F11R
ENSG00000214999.3	AC129492.6	MIMAT0002874	hsa-miR-503-5p	1956	ENSG00000146648	EGFR
ENSG00000214999.3	AC129492.6	MIMAT0002874	hsa-miR-503-5p	9020	ENSG00000006062	MAP3K14
ENSG00000214999.3	AC129492.6	MIMAT0002874	hsa-miR-503-5p	9020	ENSG00000282637	MAP3K14
ENSG00000215386.9	MIR99AHG	MIMAT0000442	hsa-miR-9-3p	1956	ENSG00000146648	EGFR
ENSG00000215417.9	MIR17HG	MIMAT0000250	hsa-miR-139-5p	9020	ENSG00000282637	MAP3K14
ENSG00000215417.9	MIR17HG	MIMAT0000250	hsa-miR-139-5p	50848	ENSG00000158769	F11R
ENSG00000215417.9	MIR17HG	MIMAT0000250	hsa-miR-139-5p	83700	ENSG00000166086	JAM3
ENSG00000215417.9	MIR17HG	MIMAT0000250	hsa-miR-139-5p	4233	ENSG00000105976	MET
ENSG00000215417.9	MIR17HG	MIMAT0000250	hsa-miR-139-5p	3725	ENSG00000177606	JUN
ENSG00000215417.9	MIR17HG	MIMAT0000250	hsa-miR-139-5p	9020	ENSG00000006062	MAP3K14
ENSG00000215481.7	BCRP3	MIMAT0000085	hsa-miR-28-5p	50848	ENSG00000158769	F11R
ENSG00000215481.7	BCRP3	MIMAT0000085	hsa-miR-28-5p	83700	ENSG00000166086	JAM3
ENSG00000216895.7	AC009403.2	MIMAT0000068	hsa-miR-15a-5p	9020	ENSG00000006062	MAP3K14
ENSG00000216895.7	AC009403.2	MIMAT0000068	hsa-miR-15a-5p	1956	ENSG00000146648	EGFR
ENSG00000216895.7	AC009403.2	MIMAT0000068	hsa-miR-15a-5p	50848	ENSG00000158769	F11R
ENSG00000216895.7	AC009403.2	MIMAT0000068	hsa-miR-15a-5p	10312	ENSG00000110719	TCIRG1
ENSG00000216895.7	AC009403.2	MIMAT0000068	hsa-miR-15a-5p	9020	ENSG00000282637	MAP3K14
ENSG00000216895.7	AC009403.2	MIMAT0000068	hsa-miR-15a-5p	83700	ENSG00000166086	JAM3
ENSG00000219410.5	RP4-761J14.8	MIMAT0000271	hsa-miR-214-3p	83700	ENSG00000166086	JAM3
ENSG00000219410.5	RP4-761J14.8	MIMAT0000271	hsa-miR-214-3p	9020	ENSG00000282637	MAP3K14
ENSG00000219410.5	RP4-761J14.8	MIMAT0000271	hsa-miR-214-3p	9020	ENSG00000006062	MAP3K14
ENSG00000219410.5	RP4-761J14.8	MIMAT0000271	hsa-miR-214-3p	50848	ENSG00000158769	F11R
ENSG00000222033.1	LINC01124	MIMAT0000076	hsa-miR-21-5p	5602	ENSG00000109339	MAPK10
ENSG00000223414.2	LINC00473	MIMAT0002813	hsa-miR-493-5p	4792	ENSG00000100906	NFKBIA
ENSG00000223414.2	LINC00473	MIMAT0002813	hsa-miR-493-5p	3725	ENSG00000177606	JUN
ENSG00000223414.2	LINC00473	MIMAT0002813	hsa-miR-493-5p	1956	ENSG00000146648	EGFR
ENSG00000223414.2	LINC00473	MIMAT0002813	hsa-miR-493-5p	3576	ENSG00000169429	CXCL8
ENSG00000223414.2	LINC00473	MIMAT0002813	hsa-miR-493-5p	7082	ENSG00000104067	TJP1
ENSG00000223414.2	LINC00473	MIMAT0002813	hsa-miR-493-5p	7082	ENSG00000277401	TJP1
ENSG00000223414.2	LINC00473	MIMAT0002813	hsa-miR-493-5p	4233	ENSG00000105976	MET
ENSG00000223478.1	RP11-545E17.3	MIMAT0000431	hsa-miR-140-5p	7082	ENSG00000277401	TJP1
ENSG00000223478.1	RP11-545E17.3	MIMAT0000431	hsa-miR-140-5p	9020	ENSG00000006062	MAP3K14
ENSG00000223478.1	RP11-545E17.3	MIMAT0000431	hsa-miR-140-5p	7082	ENSG00000104067	TJP1
ENSG00000223478.1	RP11-545E17.3	MIMAT0000431	hsa-miR-140-5p	4233	ENSG00000105976	MET
ENSG00000223478.1	RP11-545E17.3	MIMAT0000431	hsa-miR-140-5p	9020	ENSG00000282637	MAP3K14
ENSG00000223478.1	RP11-545E17.3	MIMAT0000431	hsa-miR-140-5p	50848	ENSG00000158769	F11R
ENSG00000223478.1	RP11-545E17.3	MIMAT0000431	hsa-miR-140-5p	83700	ENSG00000166086	JAM3
ENSG00000223502.1	RP11-96B5.3	MIMAT0019761	hsa-miR-4677-3p	4233	ENSG00000105976	MET
ENSG00000223502.1	RP11-96B5.3	MIMAT0019761	hsa-miR-4677-3p	3576	ENSG00000169429	CXCL8
ENSG00000223528.6	RP11-223P11.3	MIMAT0000073	hsa-miR-19a-3p	4233	ENSG00000105976	MET
ENSG00000223528.6	RP11-223P11.3	MIMAT0000073	hsa-miR-19a-3p	3576	ENSG00000169429	CXCL8
ENSG00000223528.6	RP11-223P11.3	MIMAT0000073	hsa-miR-19a-3p	9020	ENSG00000006062	MAP3K14
ENSG00000223528.6	RP11-223P11.3	MIMAT0000073	hsa-miR-19a-3p	4067	ENSG00000254087	LYN
ENSG00000223528.6	RP11-223P11.3	MIMAT0000073	hsa-miR-19a-3p	9020	ENSG00000282637	MAP3K14
ENSG00000223528.6	RP11-223P11.3	MIMAT0000073	hsa-miR-19a-3p	5602	ENSG00000109339	MAPK10
ENSG00000224152.1	AC009506.1	MIMAT0000072	hsa-miR-18a-5p	4792	ENSG00000100906	NFKBIA
ENSG00000224152.1	AC009506.1	MIMAT0000072	hsa-miR-18a-5p	50848	ENSG00000158769	F11R
ENSG00000224152.1	AC009506.1	MIMAT0000072	hsa-miR-18a-5p	83700	ENSG00000166086	JAM3
ENSG00000224743.5	TEX26-AS1	MIMAT0000068	hsa-miR-15a-5p	9020	ENSG00000006062	MAP3K14
ENSG00000224743.5	TEX26-AS1	MIMAT0000068	hsa-miR-15a-5p	50848	ENSG00000158769	F11R
ENSG00000224743.5	TEX26-AS1	MIMAT0000068	hsa-miR-15a-5p	83700	ENSG00000166086	JAM3
ENSG00000224743.5	TEX26-AS1	MIMAT0000068	hsa-miR-15a-5p	10312	ENSG00000110719	TCIRG1
ENSG00000224743.5	TEX26-AS1	MIMAT0000068	hsa-miR-15a-5p	9020	ENSG00000282637	MAP3K14
ENSG00000224743.5	TEX26-AS1	MIMAT0000068	hsa-miR-15a-5p	1956	ENSG00000146648	EGFR
ENSG00000224899.1	RP11-3B12.5	MIMAT0000242	hsa-miR-129-5p	50848	ENSG00000158769	F11R
ENSG00000224899.1	RP11-3B12.5	MIMAT0000242	hsa-miR-129-5p	1956	ENSG00000146648	EGFR
ENSG00000224899.1	RP11-3B12.5	MIMAT0000242	hsa-miR-129-5p	4233	ENSG00000105976	MET
ENSG00000224899.1	RP11-3B12.5	MIMAT0000242	hsa-miR-129-5p	4792	ENSG00000100906	NFKBIA
ENSG00000224899.1	RP11-3B12.5	MIMAT0000242	hsa-miR-129-5p	3576	ENSG00000169429	CXCL8
ENSG00000224899.1	RP11-3B12.5	MIMAT0000242	hsa-miR-129-5p	4067	ENSG00000254087	LYN
ENSG00000224903.1	AC005534.8	MIMAT0000089	hsa-miR-31-5p	4233	ENSG00000105976	MET
ENSG00000224903.1	AC005534.8	MIMAT0000089	hsa-miR-31-5p	83700	ENSG00000166086	JAM3
ENSG00000224903.1	AC005534.8	MIMAT0000089	hsa-miR-31-5p	9020	ENSG00000006062	MAP3K14
ENSG00000224903.1	AC005534.8	MIMAT0000089	hsa-miR-31-5p	9020	ENSG00000282637	MAP3K14
ENSG00000224995.1	LINC01526	MIMAT0000068	hsa-miR-15a-5p	9020	ENSG00000006062	MAP3K14
ENSG00000224995.1	LINC01526	MIMAT0000068	hsa-miR-15a-5p	10312	ENSG00000110719	TCIRG1
ENSG00000224995.1	LINC01526	MIMAT0000068	hsa-miR-15a-5p	50848	ENSG00000158769	F11R
ENSG00000224995.1	LINC01526	MIMAT0000068	hsa-miR-15a-5p	1956	ENSG00000146648	EGFR
ENSG00000224995.1	LINC01526	MIMAT0000068	hsa-miR-15a-5p	9020	ENSG00000282637	MAP3K14
ENSG00000224995.1	LINC01526	MIMAT0000068	hsa-miR-15a-5p	83700	ENSG00000166086	JAM3
ENSG00000225361.3	PPP1R26-AS1	MIMAT0000087	hsa-miR-30a-5p	4067	ENSG00000254087	LYN
ENSG00000225361.3	PPP1R26-AS1	MIMAT0000087	hsa-miR-30a-5p	3725	ENSG00000177606	JUN
ENSG00000225361.3	PPP1R26-AS1	MIMAT0000087	hsa-miR-30a-5p	83700	ENSG00000166086	JAM3
ENSG00000225361.3	PPP1R26-AS1	MIMAT0000087	hsa-miR-30a-5p	1956	ENSG00000146648	EGFR
ENSG00000225465.8	RFPL1S	MIMAT0000073	hsa-miR-19a-3p	4233	ENSG00000105976	MET
ENSG00000225465.8	RFPL1S	MIMAT0000073	hsa-miR-19a-3p	4067	ENSG00000254087	LYN
ENSG00000225465.8	RFPL1S	MIMAT0000073	hsa-miR-19a-3p	9020	ENSG00000006062	MAP3K14
ENSG00000225465.8	RFPL1S	MIMAT0000073	hsa-miR-19a-3p	3576	ENSG00000169429	CXCL8
ENSG00000225465.8	RFPL1S	MIMAT0000073	hsa-miR-19a-3p	9020	ENSG00000282637	MAP3K14
ENSG00000225465.8	RFPL1S	MIMAT0000073	hsa-miR-19a-3p	5602	ENSG00000109339	MAPK10
ENSG00000225489.5	RP11-390F4.3	MIMAT0000460	hsa-miR-194-5p	1956	ENSG00000146648	EGFR
ENSG00000225489.5	RP11-390F4.3	MIMAT0000460	hsa-miR-194-5p	4792	ENSG00000100906	NFKBIA
ENSG00000225489.5	RP11-390F4.3	MIMAT0000460	hsa-miR-194-5p	51382	ENSG00000100554	ATP6V1D
ENSG00000225489.5	RP11-390F4.3	MIMAT0000460	hsa-miR-194-5p	7082	ENSG00000277401	TJP1
ENSG00000225489.5	RP11-390F4.3	MIMAT0000460	hsa-miR-194-5p	7082	ENSG00000104067	TJP1
ENSG00000225746.7	SNHG23	MIMAT0002175	hsa-miR-485-5p	83700	ENSG00000166086	JAM3
ENSG00000225746.7	SNHG23	MIMAT0002175	hsa-miR-485-5p	9020	ENSG00000006062	MAP3K14
ENSG00000225746.7	SNHG23	MIMAT0002175	hsa-miR-485-5p	4233	ENSG00000105976	MET
ENSG00000225746.7	SNHG23	MIMAT0002175	hsa-miR-485-5p	9020	ENSG00000282637	MAP3K14
ENSG00000225783.5	MIAT	MIMAT0000437	hsa-miR-145-5p	50848	ENSG00000158769	F11R
ENSG00000225783.5	MIAT	MIMAT0000437	hsa-miR-145-5p	7082	ENSG00000104067	TJP1
ENSG00000225783.5	MIAT	MIMAT0000437	hsa-miR-145-5p	4233	ENSG00000105976	MET
ENSG00000225783.5	MIAT	MIMAT0000437	hsa-miR-145-5p	1956	ENSG00000146648	EGFR
ENSG00000225783.5	MIAT	MIMAT0000437	hsa-miR-145-5p	58494	ENSG00000154721	JAM2
ENSG00000225783.5	MIAT	MIMAT0000437	hsa-miR-145-5p	7082	ENSG00000277401	TJP1
ENSG00000225792.1	AC004540.4	MIMAT0000275	hsa-miR-218-5p	83700	ENSG00000166086	JAM3
ENSG00000225792.1	AC004540.4	MIMAT0000275	hsa-miR-218-5p	1956	ENSG00000146648	EGFR
ENSG00000225792.1	AC004540.4	MIMAT0000275	hsa-miR-218-5p	9020	ENSG00000006062	MAP3K14
ENSG00000225792.1	AC004540.4	MIMAT0000275	hsa-miR-218-5p	9020	ENSG00000282637	MAP3K14
ENSG00000225975.5	LINC01534	MIMAT0000250	hsa-miR-139-5p	9020	ENSG00000006062	MAP3K14
ENSG00000225975.5	LINC01534	MIMAT0000250	hsa-miR-139-5p	4233	ENSG00000105976	MET
ENSG00000225975.5	LINC01534	MIMAT0000250	hsa-miR-139-5p	83700	ENSG00000166086	JAM3
ENSG00000225975.5	LINC01534	MIMAT0000250	hsa-miR-139-5p	9020	ENSG00000282637	MAP3K14
ENSG00000225975.5	LINC01534	MIMAT0000250	hsa-miR-139-5p	50848	ENSG00000158769	F11R
ENSG00000225975.5	LINC01534	MIMAT0000250	hsa-miR-139-5p	3725	ENSG00000177606	JUN
ENSG00000226089.2	RP1-300G12.2	MIMAT0000091	hsa-miR-33a-5p	1956	ENSG00000146648	EGFR
ENSG00000226089.2	RP1-300G12.2	MIMAT0000091	hsa-miR-33a-5p	7082	ENSG00000104067	TJP1
ENSG00000226089.2	RP1-300G12.2	MIMAT0000091	hsa-miR-33a-5p	5602	ENSG00000109339	MAPK10
ENSG00000226089.2	RP1-300G12.2	MIMAT0000091	hsa-miR-33a-5p	7082	ENSG00000277401	TJP1
ENSG00000226089.2	RP1-300G12.2	MIMAT0000091	hsa-miR-33a-5p	4067	ENSG00000254087	LYN
ENSG00000226530.1	RP11-348F1.2	MIMAT0000068	hsa-miR-15a-5p	9020	ENSG00000006062	MAP3K14
ENSG00000226530.1	RP11-348F1.2	MIMAT0000068	hsa-miR-15a-5p	83700	ENSG00000166086	JAM3
ENSG00000226530.1	RP11-348F1.2	MIMAT0000068	hsa-miR-15a-5p	10312	ENSG00000110719	TCIRG1
ENSG00000226530.1	RP11-348F1.2	MIMAT0000068	hsa-miR-15a-5p	50848	ENSG00000158769	F11R
ENSG00000226530.1	RP11-348F1.2	MIMAT0000068	hsa-miR-15a-5p	9020	ENSG00000282637	MAP3K14
ENSG00000226530.1	RP11-348F1.2	MIMAT0000068	hsa-miR-15a-5p	1956	ENSG00000146648	EGFR
ENSG00000226686.6	LINC01535	MIMAT0017992	hsa-miR-3614-5p	1956	ENSG00000146648	EGFR
ENSG00000226686.6	LINC01535	MIMAT0017992	hsa-miR-3614-5p	3576	ENSG00000169429	CXCL8
ENSG00000226711.5	FAM66C	MIMAT0000437	hsa-miR-145-5p	7082	ENSG00000277401	TJP1
ENSG00000226711.5	FAM66C	MIMAT0000437	hsa-miR-145-5p	1956	ENSG00000146648	EGFR
ENSG00000226711.5	FAM66C	MIMAT0000437	hsa-miR-145-5p	7082	ENSG00000104067	TJP1
ENSG00000226711.5	FAM66C	MIMAT0000437	hsa-miR-145-5p	50848	ENSG00000158769	F11R
ENSG00000226711.5	FAM66C	MIMAT0000437	hsa-miR-145-5p	4233	ENSG00000105976	MET
ENSG00000226711.5	FAM66C	MIMAT0000437	hsa-miR-145-5p	58494	ENSG00000154721	JAM2
ENSG00000226738.1	CTA-384D8.31	MIMAT0000068	hsa-miR-15a-5p	10312	ENSG00000110719	TCIRG1
ENSG00000226738.1	CTA-384D8.31	MIMAT0000068	hsa-miR-15a-5p	9020	ENSG00000282637	MAP3K14
ENSG00000226738.1	CTA-384D8.31	MIMAT0000068	hsa-miR-15a-5p	1956	ENSG00000146648	EGFR
ENSG00000226738.1	CTA-384D8.31	MIMAT0000068	hsa-miR-15a-5p	50848	ENSG00000158769	F11R
ENSG00000226738.1	CTA-384D8.31	MIMAT0000068	hsa-miR-15a-5p	83700	ENSG00000166086	JAM3
ENSG00000226738.1	CTA-384D8.31	MIMAT0000068	hsa-miR-15a-5p	9020	ENSG00000006062	MAP3K14
ENSG00000226806.1	AC011893.3	MIMAT0002176	hsa-miR-485-3p	7082	ENSG00000104067	TJP1
ENSG00000226806.1	AC011893.3	MIMAT0002176	hsa-miR-485-3p	50848	ENSG00000158769	F11R
ENSG00000226806.1	AC011893.3	MIMAT0002176	hsa-miR-485-3p	2919	ENSG00000163739	CXCL1
ENSG00000226806.1	AC011893.3	MIMAT0002176	hsa-miR-485-3p	4233	ENSG00000105976	MET
ENSG00000226806.1	AC011893.3	MIMAT0002176	hsa-miR-485-3p	7082	ENSG00000277401	TJP1
ENSG00000227028.5	SLC8A1-AS1	MIMAT0000099	hsa-miR-101-3p	7082	ENSG00000104067	TJP1
ENSG00000227028.5	SLC8A1-AS1	MIMAT0000099	hsa-miR-101-3p	83700	ENSG00000166086	JAM3
ENSG00000227028.5	SLC8A1-AS1	MIMAT0000099	hsa-miR-101-3p	1956	ENSG00000146648	EGFR
ENSG00000227028.5	SLC8A1-AS1	MIMAT0000099	hsa-miR-101-3p	3576	ENSG00000169429	CXCL8
ENSG00000227028.5	SLC8A1-AS1	MIMAT0000099	hsa-miR-101-3p	51382	ENSG00000100554	ATP6V1D
ENSG00000227028.5	SLC8A1-AS1	MIMAT0000099	hsa-miR-101-3p	4233	ENSG00000105976	MET
ENSG00000227028.5	SLC8A1-AS1	MIMAT0000099	hsa-miR-101-3p	3725	ENSG00000177606	JUN
ENSG00000227028.5	SLC8A1-AS1	MIMAT0000099	hsa-miR-101-3p	7082	ENSG00000277401	TJP1
ENSG00000227028.5	SLC8A1-AS1	MIMAT0000099	hsa-miR-101-3p	50848	ENSG00000158769	F11R
ENSG00000227036.5	LINC00511	MIMAT0003165	hsa-miR-545-3p	50848	ENSG00000158769	F11R
ENSG00000227036.5	LINC00511	MIMAT0003165	hsa-miR-545-3p	1956	ENSG00000146648	EGFR
ENSG00000227036.5	LINC00511	MIMAT0003165	hsa-miR-545-3p	9020	ENSG00000282637	MAP3K14
ENSG00000227036.5	LINC00511	MIMAT0003165	hsa-miR-545-3p	83700	ENSG00000166086	JAM3
ENSG00000227036.5	LINC00511	MIMAT0003165	hsa-miR-545-3p	51382	ENSG00000100554	ATP6V1D
ENSG00000227036.5	LINC00511	MIMAT0003165	hsa-miR-545-3p	9020	ENSG00000006062	MAP3K14
ENSG00000227036.5	LINC00511	MIMAT0003165	hsa-miR-545-3p	3576	ENSG00000169429	CXCL8
ENSG00000227237.1	AL672294.1	MIMAT0000073	hsa-miR-19a-3p	9020	ENSG00000282637	MAP3K14
ENSG00000227237.1	AL672294.1	MIMAT0000073	hsa-miR-19a-3p	9020	ENSG00000006062	MAP3K14
ENSG00000227237.1	AL672294.1	MIMAT0000073	hsa-miR-19a-3p	3576	ENSG00000169429	CXCL8
ENSG00000227237.1	AL672294.1	MIMAT0000073	hsa-miR-19a-3p	4067	ENSG00000254087	LYN
ENSG00000227237.1	AL672294.1	MIMAT0000073	hsa-miR-19a-3p	4233	ENSG00000105976	MET
ENSG00000227237.1	AL672294.1	MIMAT0000073	hsa-miR-19a-3p	5602	ENSG00000109339	MAPK10
ENSG00000227467.3	LINC01537	MIMAT0000095	hsa-miR-96-5p	51382	ENSG00000100554	ATP6V1D
ENSG00000227467.3	LINC01537	MIMAT0000095	hsa-miR-96-5p	50848	ENSG00000158769	F11R
ENSG00000227467.3	LINC01537	MIMAT0000095	hsa-miR-96-5p	9020	ENSG00000006062	MAP3K14
ENSG00000227467.3	LINC01537	MIMAT0000095	hsa-miR-96-5p	4233	ENSG00000105976	MET
ENSG00000227467.3	LINC01537	MIMAT0000095	hsa-miR-96-5p	9020	ENSG00000282637	MAP3K14
ENSG00000227619.1	RP11-492E3.2	MIMAT0000089	hsa-miR-31-5p	4233	ENSG00000105976	MET
ENSG00000227619.1	RP11-492E3.2	MIMAT0000089	hsa-miR-31-5p	9020	ENSG00000282637	MAP3K14
ENSG00000227619.1	RP11-492E3.2	MIMAT0000089	hsa-miR-31-5p	83700	ENSG00000166086	JAM3
ENSG00000227619.1	RP11-492E3.2	MIMAT0000089	hsa-miR-31-5p	9020	ENSG00000006062	MAP3K14
ENSG00000227630.2	LINC01132	MIMAT0000442	hsa-miR-9-3p	1956	ENSG00000146648	EGFR
ENSG00000227695.4	DNMBP-AS1	MIMAT0000091	hsa-miR-33a-5p	4067	ENSG00000254087	LYN
ENSG00000227695.4	DNMBP-AS1	MIMAT0000091	hsa-miR-33a-5p	7082	ENSG00000104067	TJP1
ENSG00000227695.4	DNMBP-AS1	MIMAT0000091	hsa-miR-33a-5p	7082	ENSG00000277401	TJP1
ENSG00000227695.4	DNMBP-AS1	MIMAT0000091	hsa-miR-33a-5p	5602	ENSG00000109339	MAPK10
ENSG00000227695.4	DNMBP-AS1	MIMAT0000091	hsa-miR-33a-5p	1956	ENSG00000146648	EGFR
ENSG00000228010.4	AC073343.13	MIMAT0002173	hsa-miR-483-3p	50848	ENSG00000158769	F11R
ENSG00000228010.4	AC073343.13	MIMAT0002173	hsa-miR-483-3p	4792	ENSG00000100906	NFKBIA
ENSG00000228013.1	RP11-350G8.5	MIMAT0000753	hsa-miR-342-3p	50848	ENSG00000158769	F11R
ENSG00000228013.1	RP11-350G8.5	MIMAT0000753	hsa-miR-342-3p	3576	ENSG00000169429	CXCL8
ENSG00000228013.1	RP11-350G8.5	MIMAT0000753	hsa-miR-342-3p	7082	ENSG00000104067	TJP1
ENSG00000228013.1	RP11-350G8.5	MIMAT0000753	hsa-miR-342-3p	7082	ENSG00000277401	TJP1
ENSG00000228013.1	RP11-350G8.5	MIMAT0000753	hsa-miR-342-3p	1956	ENSG00000146648	EGFR
ENSG00000228293.1	RP4-686C3.7	MIMAT0002177	hsa-miR-486-5p	4233	ENSG00000105976	MET
ENSG00000228649.7	AC005682.5	MIMAT0000442	hsa-miR-9-3p	1956	ENSG00000146648	EGFR
ENSG00000228705.1	LINC00659	MIMAT0000085	hsa-miR-28-5p	50848	ENSG00000158769	F11R
ENSG00000228705.1	LINC00659	MIMAT0000085	hsa-miR-28-5p	83700	ENSG00000166086	JAM3
ENSG00000228863.7	RP11-404F10.2	MIMAT0000068	hsa-miR-15a-5p	10312	ENSG00000110719	TCIRG1
ENSG00000228863.7	RP11-404F10.2	MIMAT0000068	hsa-miR-15a-5p	83700	ENSG00000166086	JAM3
ENSG00000228863.7	RP11-404F10.2	MIMAT0000068	hsa-miR-15a-5p	50848	ENSG00000158769	F11R
ENSG00000228863.7	RP11-404F10.2	MIMAT0000068	hsa-miR-15a-5p	9020	ENSG00000282637	MAP3K14
ENSG00000228863.7	RP11-404F10.2	MIMAT0000068	hsa-miR-15a-5p	9020	ENSG00000006062	MAP3K14
ENSG00000228863.7	RP11-404F10.2	MIMAT0000068	hsa-miR-15a-5p	1956	ENSG00000146648	EGFR
ENSG00000228878.6	SEPT7-AS1	MIMAT0000068	hsa-miR-15a-5p	1956	ENSG00000146648	EGFR
ENSG00000228878.6	SEPT7-AS1	MIMAT0000068	hsa-miR-15a-5p	83700	ENSG00000166086	JAM3
ENSG00000228878.6	SEPT7-AS1	MIMAT0000068	hsa-miR-15a-5p	10312	ENSG00000110719	TCIRG1
ENSG00000228878.6	SEPT7-AS1	MIMAT0000068	hsa-miR-15a-5p	50848	ENSG00000158769	F11R
ENSG00000228878.6	SEPT7-AS1	MIMAT0000068	hsa-miR-15a-5p	9020	ENSG00000282637	MAP3K14
ENSG00000228878.6	SEPT7-AS1	MIMAT0000068	hsa-miR-15a-5p	9020	ENSG00000006062	MAP3K14
ENSG00000228889.5	UBAC2-AS1	MIMAT0000072	hsa-miR-18a-5p	50848	ENSG00000158769	F11R
ENSG00000228889.5	UBAC2-AS1	MIMAT0000072	hsa-miR-18a-5p	83700	ENSG00000166086	JAM3
ENSG00000228889.5	UBAC2-AS1	MIMAT0000072	hsa-miR-18a-5p	4792	ENSG00000100906	NFKBIA
ENSG00000229334.1	AC046143.3	MIMAT0000449	hsa-miR-146a-5p	9020	ENSG00000282637	MAP3K14
ENSG00000229334.1	AC046143.3	MIMAT0000449	hsa-miR-146a-5p	10312	ENSG00000110719	TCIRG1
ENSG00000229334.1	AC046143.3	MIMAT0000449	hsa-miR-146a-5p	83700	ENSG00000166086	JAM3
ENSG00000229334.1	AC046143.3	MIMAT0000449	hsa-miR-146a-5p	3725	ENSG00000177606	JUN
ENSG00000229334.1	AC046143.3	MIMAT0000449	hsa-miR-146a-5p	9020	ENSG00000006062	MAP3K14
ENSG00000229334.1	AC046143.3	MIMAT0000449	hsa-miR-146a-5p	1956	ENSG00000146648	EGFR
ENSG00000229334.1	AC046143.3	MIMAT0000449	hsa-miR-146a-5p	2919	ENSG00000163739	CXCL1
ENSG00000229404.4	LINC00858	MIMAT0000646	hsa-miR-155-5p	5602	ENSG00000109339	MAPK10
ENSG00000229404.4	LINC00858	MIMAT0000646	hsa-miR-155-5p	9020	ENSG00000006062	MAP3K14
ENSG00000229404.4	LINC00858	MIMAT0000646	hsa-miR-155-5p	7082	ENSG00000277401	TJP1
ENSG00000229404.4	LINC00858	MIMAT0000646	hsa-miR-155-5p	9020	ENSG00000282637	MAP3K14
ENSG00000229404.4	LINC00858	MIMAT0000646	hsa-miR-155-5p	4233	ENSG00000105976	MET
ENSG00000229404.4	LINC00858	MIMAT0000646	hsa-miR-155-5p	7082	ENSG00000104067	TJP1
ENSG00000229404.4	LINC00858	MIMAT0000646	hsa-miR-155-5p	1956	ENSG00000146648	EGFR
ENSG00000229404.4	LINC00858	MIMAT0000646	hsa-miR-155-5p	51382	ENSG00000100554	ATP6V1D
ENSG00000229404.4	LINC00858	MIMAT0000646	hsa-miR-155-5p	50848	ENSG00000158769	F11R
ENSG00000229589.1	ACVR2B-AS1	MIMAT0000435	hsa-miR-143-3p	83700	ENSG00000166086	JAM3
ENSG00000229589.1	ACVR2B-AS1	MIMAT0000435	hsa-miR-143-3p	1956	ENSG00000146648	EGFR
ENSG00000229589.1	ACVR2B-AS1	MIMAT0000435	hsa-miR-143-3p	50848	ENSG00000158769	F11R
ENSG00000229619.3	MBNL1-AS1	MIMAT0000226	hsa-miR-196a-5p	7082	ENSG00000104067	TJP1
ENSG00000229619.3	MBNL1-AS1	MIMAT0000226	hsa-miR-196a-5p	2919	ENSG00000163739	CXCL1
ENSG00000229619.3	MBNL1-AS1	MIMAT0000226	hsa-miR-196a-5p	7082	ENSG00000277401	TJP1
ENSG00000229619.3	MBNL1-AS1	MIMAT0000226	hsa-miR-196a-5p	4792	ENSG00000100906	NFKBIA
ENSG00000229953.1	RP11-284F21.7	MIMAT0000275	hsa-miR-218-5p	83700	ENSG00000166086	JAM3
ENSG00000229953.1	RP11-284F21.7	MIMAT0000275	hsa-miR-218-5p	1956	ENSG00000146648	EGFR
ENSG00000229953.1	RP11-284F21.7	MIMAT0000275	hsa-miR-218-5p	9020	ENSG00000006062	MAP3K14
ENSG00000229953.1	RP11-284F21.7	MIMAT0000275	hsa-miR-218-5p	9020	ENSG00000282637	MAP3K14
ENSG00000229956.8	ZRANB2-AS2	MIMAT0000433	hsa-miR-142-5p	3576	ENSG00000169429	CXCL8
ENSG00000229956.8	ZRANB2-AS2	MIMAT0000433	hsa-miR-142-5p	1956	ENSG00000146648	EGFR
ENSG00000230300.1	STARD13-IT1	MIMAT0002175	hsa-miR-485-5p	9020	ENSG00000282637	MAP3K14
ENSG00000230300.1	STARD13-IT1	MIMAT0002175	hsa-miR-485-5p	9020	ENSG00000006062	MAP3K14
ENSG00000230300.1	STARD13-IT1	MIMAT0002175	hsa-miR-485-5p	83700	ENSG00000166086	JAM3
ENSG00000230300.1	STARD13-IT1	MIMAT0002175	hsa-miR-485-5p	4233	ENSG00000105976	MET
ENSG00000230479.1	AP000695.6	MIMAT0022717	hsa-miR-873-3p	9020	ENSG00000282637	MAP3K14
ENSG00000230479.1	AP000695.6	MIMAT0022717	hsa-miR-873-3p	9020	ENSG00000006062	MAP3K14
ENSG00000230699.2	RP11-54O7.1	MIMAT0002175	hsa-miR-485-5p	4233	ENSG00000105976	MET
ENSG00000230699.2	RP11-54O7.1	MIMAT0002175	hsa-miR-485-5p	83700	ENSG00000166086	JAM3
ENSG00000230699.2	RP11-54O7.1	MIMAT0002175	hsa-miR-485-5p	9020	ENSG00000282637	MAP3K14
ENSG00000230699.2	RP11-54O7.1	MIMAT0002175	hsa-miR-485-5p	9020	ENSG00000006062	MAP3K14
ENSG00000231131.5	LINC01468	MIMAT0000087	hsa-miR-30a-5p	1956	ENSG00000146648	EGFR
ENSG00000231131.5	LINC01468	MIMAT0000087	hsa-miR-30a-5p	83700	ENSG00000166086	JAM3
ENSG00000231131.5	LINC01468	MIMAT0000087	hsa-miR-30a-5p	3725	ENSG00000177606	JUN
ENSG00000231131.5	LINC01468	MIMAT0000087	hsa-miR-30a-5p	4067	ENSG00000254087	LYN
ENSG00000231160.8	KLF3-AS1	MIMAT0002888	hsa-miR-532-5p	4233	ENSG00000105976	MET
ENSG00000231160.8	KLF3-AS1	MIMAT0002888	hsa-miR-532-5p	7082	ENSG00000104067	TJP1
ENSG00000231160.8	KLF3-AS1	MIMAT0002888	hsa-miR-532-5p	2919	ENSG00000163739	CXCL1
ENSG00000231160.8	KLF3-AS1	MIMAT0002888	hsa-miR-532-5p	7082	ENSG00000277401	TJP1
ENSG00000231249.1	ITPR1-AS1	MIMAT0000261	hsa-miR-183-5p	83700	ENSG00000166086	JAM3
ENSG00000231249.1	ITPR1-AS1	MIMAT0000261	hsa-miR-183-5p	4233	ENSG00000105976	MET
ENSG00000231249.1	ITPR1-AS1	MIMAT0000261	hsa-miR-183-5p	3576	ENSG00000169429	CXCL8
ENSG00000231249.1	ITPR1-AS1	MIMAT0000261	hsa-miR-183-5p	50848	ENSG00000158769	F11R
ENSG00000231249.1	ITPR1-AS1	MIMAT0000261	hsa-miR-183-5p	1956	ENSG00000146648	EGFR
ENSG00000231439.4	WASIR2	MIMAT0000232	hsa-miR-199a-3p	7082	ENSG00000104067	TJP1
ENSG00000231439.4	WASIR2	MIMAT0000232	hsa-miR-199a-3p	7082	ENSG00000277401	TJP1
ENSG00000231439.4	WASIR2	MIMAT0000232	hsa-miR-199a-3p	4233	ENSG00000105976	MET
ENSG00000231439.4	WASIR2	MIMAT0000232	hsa-miR-199a-3p	50848	ENSG00000158769	F11R
ENSG00000231711.2	LINC00899	MIMAT0000271	hsa-miR-214-3p	83700	ENSG00000166086	JAM3
ENSG00000231711.2	LINC00899	MIMAT0000271	hsa-miR-214-3p	9020	ENSG00000006062	MAP3K14
ENSG00000231711.2	LINC00899	MIMAT0000271	hsa-miR-214-3p	9020	ENSG00000282637	MAP3K14
ENSG00000231711.2	LINC00899	MIMAT0000271	hsa-miR-214-3p	50848	ENSG00000158769	F11R
ENSG00000231871.4	IPO9-AS1	MIMAT0000068	hsa-miR-15a-5p	1956	ENSG00000146648	EGFR
ENSG00000231871.4	IPO9-AS1	MIMAT0000068	hsa-miR-15a-5p	9020	ENSG00000006062	MAP3K14
ENSG00000231871.4	IPO9-AS1	MIMAT0000068	hsa-miR-15a-5p	83700	ENSG00000166086	JAM3
ENSG00000231871.4	IPO9-AS1	MIMAT0000068	hsa-miR-15a-5p	9020	ENSG00000282637	MAP3K14
ENSG00000231871.4	IPO9-AS1	MIMAT0000068	hsa-miR-15a-5p	50848	ENSG00000158769	F11R
ENSG00000231871.4	IPO9-AS1	MIMAT0000068	hsa-miR-15a-5p	10312	ENSG00000110719	TCIRG1
ENSG00000232063.1	RP11-307E17.8	MIMAT0004679	hsa-miR-296-3p	83700	ENSG00000166086	JAM3
ENSG00000232063.1	RP11-307E17.8	MIMAT0004679	hsa-miR-296-3p	51382	ENSG00000100554	ATP6V1D
ENSG00000232063.1	RP11-307E17.8	MIMAT0004679	hsa-miR-296-3p	3576	ENSG00000169429	CXCL8
ENSG00000232081.1	LARGE-IT1	MIMAT0000442	hsa-miR-9-3p	1956	ENSG00000146648	EGFR
ENSG00000232160.5	RAP2C-AS1	MIMAT0000095	hsa-miR-96-5p	9020	ENSG00000006062	MAP3K14
ENSG00000232160.5	RAP2C-AS1	MIMAT0000095	hsa-miR-96-5p	51382	ENSG00000100554	ATP6V1D
ENSG00000232160.5	RAP2C-AS1	MIMAT0000095	hsa-miR-96-5p	9020	ENSG00000282637	MAP3K14
ENSG00000232160.5	RAP2C-AS1	MIMAT0000095	hsa-miR-96-5p	50848	ENSG00000158769	F11R
ENSG00000232160.5	RAP2C-AS1	MIMAT0000095	hsa-miR-96-5p	4233	ENSG00000105976	MET
ENSG00000232229.4	LINC00865	MIMAT0000085	hsa-miR-28-5p	83700	ENSG00000166086	JAM3
ENSG00000232229.4	LINC00865	MIMAT0000085	hsa-miR-28-5p	50848	ENSG00000158769	F11R
ENSG00000232284.6	GNG12-AS1	MIMAT0004564	hsa-miR-214-5p	10312	ENSG00000110719	TCIRG1
ENSG00000232284.6	GNG12-AS1	MIMAT0004564	hsa-miR-214-5p	4233	ENSG00000105976	MET
ENSG00000232347.1	RP11-488L18.8	MIMAT0000095	hsa-miR-96-5p	9020	ENSG00000006062	MAP3K14
ENSG00000232347.1	RP11-488L18.8	MIMAT0000095	hsa-miR-96-5p	9020	ENSG00000282637	MAP3K14
ENSG00000232347.1	RP11-488L18.8	MIMAT0000095	hsa-miR-96-5p	50848	ENSG00000158769	F11R
ENSG00000232347.1	RP11-488L18.8	MIMAT0000095	hsa-miR-96-5p	51382	ENSG00000100554	ATP6V1D
ENSG00000232347.1	RP11-488L18.8	MIMAT0000095	hsa-miR-96-5p	4233	ENSG00000105976	MET
ENSG00000232445.1	RP11-132A1.4	MIMAT0000736	hsa-miR-381-3p	7082	ENSG00000104067	TJP1
ENSG00000232445.1	RP11-132A1.4	MIMAT0000736	hsa-miR-381-3p	3725	ENSG00000177606	JUN
ENSG00000232445.1	RP11-132A1.4	MIMAT0000736	hsa-miR-381-3p	4233	ENSG00000105976	MET
ENSG00000232445.1	RP11-132A1.4	MIMAT0000736	hsa-miR-381-3p	50848	ENSG00000158769	F11R
ENSG00000232445.1	RP11-132A1.4	MIMAT0000736	hsa-miR-381-3p	3576	ENSG00000169429	CXCL8
ENSG00000232445.1	RP11-132A1.4	MIMAT0000736	hsa-miR-381-3p	7082	ENSG00000277401	TJP1
ENSG00000232445.1	RP11-132A1.4	MIMAT0000736	hsa-miR-381-3p	4792	ENSG00000100906	NFKBIA
ENSG00000232555.1	AC104088.1	MIMAT0000231	hsa-miR-199a-5p	4067	ENSG00000254087	LYN
ENSG00000232555.1	AC104088.1	MIMAT0000231	hsa-miR-199a-5p	2919	ENSG00000163739	CXCL1
ENSG00000232555.1	AC104088.1	MIMAT0000231	hsa-miR-199a-5p	50848	ENSG00000158769	F11R
ENSG00000232555.1	AC104088.1	MIMAT0000231	hsa-miR-199a-5p	83700	ENSG00000166086	JAM3
ENSG00000232555.1	AC104088.1	MIMAT0000231	hsa-miR-199a-5p	51382	ENSG00000100554	ATP6V1D
ENSG00000232555.1	AC104088.1	MIMAT0000231	hsa-miR-199a-5p	58494	ENSG00000154721	JAM2
ENSG00000232874.1	RP11-135A1.2	MIMAT0004564	hsa-miR-214-5p	4233	ENSG00000105976	MET
ENSG00000232874.1	RP11-135A1.2	MIMAT0004564	hsa-miR-214-5p	10312	ENSG00000110719	TCIRG1
ENSG00000232884.6	AF127936.3	MIMAT0000765	hsa-miR-335-5p	6352	ENSG00000274233	CCL5
ENSG00000232884.6	AF127936.3	MIMAT0000765	hsa-miR-335-5p	6352	ENSG00000271503	CCL5
ENSG00000232884.6	AF127936.3	MIMAT0000765	hsa-miR-335-5p	7082	ENSG00000104067	TJP1
ENSG00000232884.6	AF127936.3	MIMAT0000765	hsa-miR-335-5p	7082	ENSG00000277401	TJP1
ENSG00000232884.6	AF127936.3	MIMAT0000765	hsa-miR-335-5p	4233	ENSG00000105976	MET
ENSG00000232884.6	AF127936.3	MIMAT0000765	hsa-miR-335-5p	50848	ENSG00000158769	F11R
ENSG00000233203.5	RP11-67L3.4	MIMAT0000253	hsa-miR-10a-5p	4233	ENSG00000105976	MET
ENSG00000233203.5	RP11-67L3.4	MIMAT0000253	hsa-miR-10a-5p	50848	ENSG00000158769	F11R
ENSG00000233203.5	RP11-67L3.4	MIMAT0000253	hsa-miR-10a-5p	3576	ENSG00000169429	CXCL8
ENSG00000233203.5	RP11-67L3.4	MIMAT0000253	hsa-miR-10a-5p	83700	ENSG00000166086	JAM3
ENSG00000233429.8	HOTAIRM1	MIMAT0000089	hsa-miR-31-5p	83700	ENSG00000166086	JAM3
ENSG00000233429.8	HOTAIRM1	MIMAT0000089	hsa-miR-31-5p	9020	ENSG00000282637	MAP3K14
ENSG00000233429.8	HOTAIRM1	MIMAT0000089	hsa-miR-31-5p	4233	ENSG00000105976	MET
ENSG00000233429.8	HOTAIRM1	MIMAT0000089	hsa-miR-31-5p	9020	ENSG00000006062	MAP3K14
ENSG00000234203.1	RP5-1050D4.2	MIMAT0000433	hsa-miR-142-5p	1956	ENSG00000146648	EGFR
ENSG00000234203.1	RP5-1050D4.2	MIMAT0000433	hsa-miR-142-5p	3576	ENSG00000169429	CXCL8
ENSG00000234449.2	RP11-706O15.3	MIMAT0000772	hsa-miR-345-5p	50848	ENSG00000158769	F11R
ENSG00000234449.2	RP11-706O15.3	MIMAT0000772	hsa-miR-345-5p	1956	ENSG00000146648	EGFR
ENSG00000234449.2	RP11-706O15.3	MIMAT0000772	hsa-miR-345-5p	9020	ENSG00000006062	MAP3K14
ENSG00000234449.2	RP11-706O15.3	MIMAT0000772	hsa-miR-345-5p	83700	ENSG00000166086	JAM3
ENSG00000234449.2	RP11-706O15.3	MIMAT0000772	hsa-miR-345-5p	9020	ENSG00000282637	MAP3K14
ENSG00000234771.3	SLC25A25-AS1	MIMAT0000073	hsa-miR-19a-3p	3576	ENSG00000169429	CXCL8
ENSG00000234771.3	SLC25A25-AS1	MIMAT0000073	hsa-miR-19a-3p	4067	ENSG00000254087	LYN
ENSG00000234771.3	SLC25A25-AS1	MIMAT0000073	hsa-miR-19a-3p	4233	ENSG00000105976	MET
ENSG00000234771.3	SLC25A25-AS1	MIMAT0000073	hsa-miR-19a-3p	9020	ENSG00000006062	MAP3K14
ENSG00000234771.3	SLC25A25-AS1	MIMAT0000073	hsa-miR-19a-3p	9020	ENSG00000282637	MAP3K14
ENSG00000234771.3	SLC25A25-AS1	MIMAT0000073	hsa-miR-19a-3p	5602	ENSG00000109339	MAPK10
ENSG00000234883.3	MIR155HG	MIMAT0000250	hsa-miR-139-5p	3725	ENSG00000177606	JUN
ENSG00000234883.3	MIR155HG	MIMAT0000250	hsa-miR-139-5p	50848	ENSG00000158769	F11R
ENSG00000234883.3	MIR155HG	MIMAT0000250	hsa-miR-139-5p	9020	ENSG00000282637	MAP3K14
ENSG00000234883.3	MIR155HG	MIMAT0000250	hsa-miR-139-5p	9020	ENSG00000006062	MAP3K14
ENSG00000234883.3	MIR155HG	MIMAT0000250	hsa-miR-139-5p	83700	ENSG00000166086	JAM3
ENSG00000234883.3	MIR155HG	MIMAT0000250	hsa-miR-139-5p	4233	ENSG00000105976	MET
ENSG00000234913.1	XXbac-B476C20.13	MIMAT0000450	hsa-miR-149-5p	9020	ENSG00000006062	MAP3K14
ENSG00000234913.1	XXbac-B476C20.13	MIMAT0000450	hsa-miR-149-5p	3576	ENSG00000169429	CXCL8
ENSG00000234913.1	XXbac-B476C20.13	MIMAT0000450	hsa-miR-149-5p	7082	ENSG00000104067	TJP1
ENSG00000234913.1	XXbac-B476C20.13	MIMAT0000450	hsa-miR-149-5p	3725	ENSG00000177606	JUN
ENSG00000234913.1	XXbac-B476C20.13	MIMAT0000450	hsa-miR-149-5p	4792	ENSG00000100906	NFKBIA
ENSG00000234913.1	XXbac-B476C20.13	MIMAT0000450	hsa-miR-149-5p	4233	ENSG00000105976	MET
ENSG00000234913.1	XXbac-B476C20.13	MIMAT0000450	hsa-miR-149-5p	9020	ENSG00000282637	MAP3K14
ENSG00000234913.1	XXbac-B476C20.13	MIMAT0000450	hsa-miR-149-5p	50848	ENSG00000158769	F11R
ENSG00000234913.1	XXbac-B476C20.13	MIMAT0000450	hsa-miR-149-5p	1956	ENSG00000146648	EGFR
ENSG00000234913.1	XXbac-B476C20.13	MIMAT0000450	hsa-miR-149-5p	7082	ENSG00000277401	TJP1
ENSG00000234949.2	AC104667.3	MIMAT0000068	hsa-miR-15a-5p	9020	ENSG00000282637	MAP3K14
ENSG00000234949.2	AC104667.3	MIMAT0000068	hsa-miR-15a-5p	1956	ENSG00000146648	EGFR
ENSG00000234949.2	AC104667.3	MIMAT0000068	hsa-miR-15a-5p	50848	ENSG00000158769	F11R
ENSG00000234949.2	AC104667.3	MIMAT0000068	hsa-miR-15a-5p	83700	ENSG00000166086	JAM3
ENSG00000234949.2	AC104667.3	MIMAT0000068	hsa-miR-15a-5p	9020	ENSG00000006062	MAP3K14
ENSG00000234949.2	AC104667.3	MIMAT0000068	hsa-miR-15a-5p	10312	ENSG00000110719	TCIRG1
ENSG00000235142.6	RP1-60O19.1	MIMAT0000099	hsa-miR-101-3p	7082	ENSG00000104067	TJP1
ENSG00000235142.6	RP1-60O19.1	MIMAT0000099	hsa-miR-101-3p	83700	ENSG00000166086	JAM3
ENSG00000235142.6	RP1-60O19.1	MIMAT0000099	hsa-miR-101-3p	1956	ENSG00000146648	EGFR
ENSG00000235142.6	RP1-60O19.1	MIMAT0000099	hsa-miR-101-3p	3576	ENSG00000169429	CXCL8
ENSG00000235142.6	RP1-60O19.1	MIMAT0000099	hsa-miR-101-3p	51382	ENSG00000100554	ATP6V1D
ENSG00000235142.6	RP1-60O19.1	MIMAT0000099	hsa-miR-101-3p	4233	ENSG00000105976	MET
ENSG00000235142.6	RP1-60O19.1	MIMAT0000099	hsa-miR-101-3p	3725	ENSG00000177606	JUN
ENSG00000235142.6	RP1-60O19.1	MIMAT0000099	hsa-miR-101-3p	7082	ENSG00000277401	TJP1
ENSG00000235142.6	RP1-60O19.1	MIMAT0000099	hsa-miR-101-3p	50848	ENSG00000158769	F11R
ENSG00000235257.7	ITGA9-AS1	MIMAT0002175	hsa-miR-485-5p	9020	ENSG00000282637	MAP3K14
ENSG00000235257.7	ITGA9-AS1	MIMAT0002175	hsa-miR-485-5p	9020	ENSG00000006062	MAP3K14
ENSG00000235257.7	ITGA9-AS1	MIMAT0002175	hsa-miR-485-5p	4233	ENSG00000105976	MET
ENSG00000235257.7	ITGA9-AS1	MIMAT0002175	hsa-miR-485-5p	83700	ENSG00000166086	JAM3
ENSG00000235366.2	LINC01055	MIMAT0000450	hsa-miR-149-5p	1956	ENSG00000146648	EGFR
ENSG00000235366.2	LINC01055	MIMAT0000450	hsa-miR-149-5p	3725	ENSG00000177606	JUN
ENSG00000235366.2	LINC01055	MIMAT0000450	hsa-miR-149-5p	4792	ENSG00000100906	NFKBIA
ENSG00000235366.2	LINC01055	MIMAT0000450	hsa-miR-149-5p	7082	ENSG00000104067	TJP1
ENSG00000235366.2	LINC01055	MIMAT0000450	hsa-miR-149-5p	7082	ENSG00000277401	TJP1
ENSG00000235366.2	LINC01055	MIMAT0000450	hsa-miR-149-5p	4233	ENSG00000105976	MET
ENSG00000235366.2	LINC01055	MIMAT0000450	hsa-miR-149-5p	50848	ENSG00000158769	F11R
ENSG00000235366.2	LINC01055	MIMAT0000450	hsa-miR-149-5p	9020	ENSG00000006062	MAP3K14
ENSG00000235366.2	LINC01055	MIMAT0000450	hsa-miR-149-5p	9020	ENSG00000282637	MAP3K14
ENSG00000235366.2	LINC01055	MIMAT0000450	hsa-miR-149-5p	3576	ENSG00000169429	CXCL8
ENSG00000235426.2	RP11-342M3.5	MIMAT0004784	hsa-miR-455-3p	7082	ENSG00000277401	TJP1
ENSG00000235426.2	RP11-342M3.5	MIMAT0004784	hsa-miR-455-3p	7082	ENSG00000104067	TJP1
ENSG00000235426.2	RP11-342M3.5	MIMAT0004784	hsa-miR-455-3p	3725	ENSG00000177606	JUN
ENSG00000235426.2	RP11-342M3.5	MIMAT0004784	hsa-miR-455-3p	1956	ENSG00000146648	EGFR
ENSG00000235437.6	LINC01278	MIMAT0000732	hsa-miR-378a-3p	9020	ENSG00000282637	MAP3K14
ENSG00000235437.6	LINC01278	MIMAT0000732	hsa-miR-378a-3p	9020	ENSG00000006062	MAP3K14
ENSG00000235532.1	LINC00402	MIMAT0000455	hsa-miR-185-5p	7082	ENSG00000277401	TJP1
ENSG00000235532.1	LINC00402	MIMAT0000455	hsa-miR-185-5p	4067	ENSG00000254087	LYN
ENSG00000235532.1	LINC00402	MIMAT0000455	hsa-miR-185-5p	3576	ENSG00000169429	CXCL8
ENSG00000235532.1	LINC00402	MIMAT0000455	hsa-miR-185-5p	7082	ENSG00000104067	TJP1
ENSG00000235532.1	LINC00402	MIMAT0000455	hsa-miR-185-5p	1956	ENSG00000146648	EGFR
ENSG00000235621.7	LINC00494	MIMAT0000232	hsa-miR-199a-3p	50848	ENSG00000158769	F11R
ENSG00000235621.7	LINC00494	MIMAT0000232	hsa-miR-199a-3p	4233	ENSG00000105976	MET
ENSG00000235621.7	LINC00494	MIMAT0000232	hsa-miR-199a-3p	7082	ENSG00000104067	TJP1
ENSG00000235621.7	LINC00494	MIMAT0000232	hsa-miR-199a-3p	7082	ENSG00000277401	TJP1
ENSG00000235726.4	AC010148.1	MIMAT0000437	hsa-miR-145-5p	58494	ENSG00000154721	JAM2
ENSG00000235726.4	AC010148.1	MIMAT0000437	hsa-miR-145-5p	7082	ENSG00000104067	TJP1
ENSG00000235726.4	AC010148.1	MIMAT0000437	hsa-miR-145-5p	1956	ENSG00000146648	EGFR
ENSG00000235726.4	AC010148.1	MIMAT0000437	hsa-miR-145-5p	4233	ENSG00000105976	MET
ENSG00000235726.4	AC010148.1	MIMAT0000437	hsa-miR-145-5p	50848	ENSG00000158769	F11R
ENSG00000235726.4	AC010148.1	MIMAT0000437	hsa-miR-145-5p	7082	ENSG00000277401	TJP1
ENSG00000236283.2	AC013463.2	MIMAT0000250	hsa-miR-139-5p	3725	ENSG00000177606	JUN
ENSG00000236283.2	AC013463.2	MIMAT0000250	hsa-miR-139-5p	50848	ENSG00000158769	F11R
ENSG00000236283.2	AC013463.2	MIMAT0000250	hsa-miR-139-5p	9020	ENSG00000282637	MAP3K14
ENSG00000236283.2	AC013463.2	MIMAT0000250	hsa-miR-139-5p	83700	ENSG00000166086	JAM3
ENSG00000236283.2	AC013463.2	MIMAT0000250	hsa-miR-139-5p	9020	ENSG00000006062	MAP3K14
ENSG00000236283.2	AC013463.2	MIMAT0000250	hsa-miR-139-5p	4233	ENSG00000105976	MET
ENSG00000236404.7	VLDLR-AS1	MIMAT0000095	hsa-miR-96-5p	50848	ENSG00000158769	F11R
ENSG00000236404.7	VLDLR-AS1	MIMAT0000095	hsa-miR-96-5p	51382	ENSG00000100554	ATP6V1D
ENSG00000236404.7	VLDLR-AS1	MIMAT0000095	hsa-miR-96-5p	9020	ENSG00000006062	MAP3K14
ENSG00000236404.7	VLDLR-AS1	MIMAT0000095	hsa-miR-96-5p	9020	ENSG00000282637	MAP3K14
ENSG00000236404.7	VLDLR-AS1	MIMAT0000095	hsa-miR-96-5p	4233	ENSG00000105976	MET
ENSG00000236499.2	LINC00896	MIMAT0000068	hsa-miR-15a-5p	50848	ENSG00000158769	F11R
ENSG00000236499.2	LINC00896	MIMAT0000068	hsa-miR-15a-5p	10312	ENSG00000110719	TCIRG1
ENSG00000236499.2	LINC00896	MIMAT0000068	hsa-miR-15a-5p	9020	ENSG00000006062	MAP3K14
ENSG00000236499.2	LINC00896	MIMAT0000068	hsa-miR-15a-5p	9020	ENSG00000282637	MAP3K14
ENSG00000236499.2	LINC00896	MIMAT0000068	hsa-miR-15a-5p	83700	ENSG00000166086	JAM3
ENSG00000236499.2	LINC00896	MIMAT0000068	hsa-miR-15a-5p	1956	ENSG00000146648	EGFR
ENSG00000236559.1	RP11-243J16.7	MIMAT0000085	hsa-miR-28-5p	83700	ENSG00000166086	JAM3
ENSG00000236559.1	RP11-243J16.7	MIMAT0000085	hsa-miR-28-5p	50848	ENSG00000158769	F11R
ENSG00000236790.4	LINC00299	MIMAT0000451	hsa-miR-150-5p	9020	ENSG00000282637	MAP3K14
ENSG00000236790.4	LINC00299	MIMAT0000451	hsa-miR-150-5p	4233	ENSG00000105976	MET
ENSG00000236790.4	LINC00299	MIMAT0000451	hsa-miR-150-5p	51382	ENSG00000100554	ATP6V1D
ENSG00000236790.4	LINC00299	MIMAT0000451	hsa-miR-150-5p	9020	ENSG00000006062	MAP3K14
ENSG00000236901.4	MIR600HG	MIMAT0000752	hsa-miR-328-3p	50848	ENSG00000158769	F11R
ENSG00000236901.4	MIR600HG	MIMAT0000752	hsa-miR-328-3p	3576	ENSG00000169429	CXCL8
ENSG00000236953.1	ZDHHC20-IT1	MIMAT0000095	hsa-miR-96-5p	51382	ENSG00000100554	ATP6V1D
ENSG00000236953.1	ZDHHC20-IT1	MIMAT0000095	hsa-miR-96-5p	50848	ENSG00000158769	F11R
ENSG00000236953.1	ZDHHC20-IT1	MIMAT0000095	hsa-miR-96-5p	9020	ENSG00000006062	MAP3K14
ENSG00000236953.1	ZDHHC20-IT1	MIMAT0000095	hsa-miR-96-5p	4233	ENSG00000105976	MET
ENSG00000236953.1	ZDHHC20-IT1	MIMAT0000095	hsa-miR-96-5p	9020	ENSG00000282637	MAP3K14
ENSG00000237200.1	ZBTB40-IT1	MIMAT0000076	hsa-miR-21-5p	5602	ENSG00000109339	MAPK10
ENSG00000237361.2	TUSC8	MIMAT0000459	hsa-miR-193a-3p	7082	ENSG00000104067	TJP1
ENSG00000237361.2	TUSC8	MIMAT0000459	hsa-miR-193a-3p	7082	ENSG00000277401	TJP1
ENSG00000237361.2	TUSC8	MIMAT0000459	hsa-miR-193a-3p	5602	ENSG00000109339	MAPK10
ENSG00000237361.2	TUSC8	MIMAT0000459	hsa-miR-193a-3p	4233	ENSG00000105976	MET
ENSG00000237361.2	TUSC8	MIMAT0000459	hsa-miR-193a-3p	83700	ENSG00000166086	JAM3
ENSG00000237361.2	TUSC8	MIMAT0000459	hsa-miR-193a-3p	1956	ENSG00000146648	EGFR
ENSG00000237361.2	TUSC8	MIMAT0000459	hsa-miR-193a-3p	3576	ENSG00000169429	CXCL8
ENSG00000237422.1	RP11-305L7.3	MIMAT0004748	hsa-miR-423-5p	1956	ENSG00000146648	EGFR
ENSG00000237424.1	FOXD2-AS1	MIMAT0000727	hsa-miR-374a-5p	2919	ENSG00000163739	CXCL1
ENSG00000237424.1	FOXD2-AS1	MIMAT0000727	hsa-miR-374a-5p	4233	ENSG00000105976	MET
ENSG00000237424.1	FOXD2-AS1	MIMAT0000727	hsa-miR-374a-5p	7082	ENSG00000277401	TJP1
ENSG00000237424.1	FOXD2-AS1	MIMAT0000727	hsa-miR-374a-5p	7082	ENSG00000104067	TJP1
ENSG00000237491.7	RP11-206L10.9	MIMAT0000752	hsa-miR-328-3p	50848	ENSG00000158769	F11R
ENSG00000237491.7	RP11-206L10.9	MIMAT0000752	hsa-miR-328-3p	3576	ENSG00000169429	CXCL8
ENSG00000237513.1	RP11-325F22.2	MIMAT0000427	hsa-miR-133a-3p	3725	ENSG00000177606	JUN
ENSG00000237513.1	RP11-325F22.2	MIMAT0000427	hsa-miR-133a-3p	1956	ENSG00000146648	EGFR
ENSG00000237513.1	RP11-325F22.2	MIMAT0000427	hsa-miR-133a-3p	4233	ENSG00000105976	MET
ENSG00000237513.1	RP11-325F22.2	MIMAT0000427	hsa-miR-133a-3p	9020	ENSG00000006062	MAP3K14
ENSG00000237513.1	RP11-325F22.2	MIMAT0000427	hsa-miR-133a-3p	9020	ENSG00000282637	MAP3K14
ENSG00000237686.5	RP5-1120P11.1	MIMAT0004679	hsa-miR-296-3p	3576	ENSG00000169429	CXCL8
ENSG00000237686.5	RP5-1120P11.1	MIMAT0004679	hsa-miR-296-3p	51382	ENSG00000100554	ATP6V1D
ENSG00000237686.5	RP5-1120P11.1	MIMAT0004679	hsa-miR-296-3p	83700	ENSG00000166086	JAM3
ENSG00000237975.5	FLG-AS1	MIMAT0000231	hsa-miR-199a-5p	50848	ENSG00000158769	F11R
ENSG00000237975.5	FLG-AS1	MIMAT0000231	hsa-miR-199a-5p	4067	ENSG00000254087	LYN
ENSG00000237975.5	FLG-AS1	MIMAT0000231	hsa-miR-199a-5p	83700	ENSG00000166086	JAM3
ENSG00000237975.5	FLG-AS1	MIMAT0000231	hsa-miR-199a-5p	51382	ENSG00000100554	ATP6V1D
ENSG00000237975.5	FLG-AS1	MIMAT0000231	hsa-miR-199a-5p	58494	ENSG00000154721	JAM2
ENSG00000237975.5	FLG-AS1	MIMAT0000231	hsa-miR-199a-5p	2919	ENSG00000163739	CXCL1
ENSG00000237978.4	KCNMB2-AS1	MIMAT0000099	hsa-miR-101-3p	3725	ENSG00000177606	JUN
ENSG00000237978.4	KCNMB2-AS1	MIMAT0000099	hsa-miR-101-3p	50848	ENSG00000158769	F11R
ENSG00000237978.4	KCNMB2-AS1	MIMAT0000099	hsa-miR-101-3p	4233	ENSG00000105976	MET
ENSG00000237978.4	KCNMB2-AS1	MIMAT0000099	hsa-miR-101-3p	7082	ENSG00000277401	TJP1
ENSG00000237978.4	KCNMB2-AS1	MIMAT0000099	hsa-miR-101-3p	83700	ENSG00000166086	JAM3
ENSG00000237978.4	KCNMB2-AS1	MIMAT0000099	hsa-miR-101-3p	7082	ENSG00000104067	TJP1
ENSG00000237978.4	KCNMB2-AS1	MIMAT0000099	hsa-miR-101-3p	3576	ENSG00000169429	CXCL8
ENSG00000237978.4	KCNMB2-AS1	MIMAT0000099	hsa-miR-101-3p	1956	ENSG00000146648	EGFR
ENSG00000237978.4	KCNMB2-AS1	MIMAT0000099	hsa-miR-101-3p	51382	ENSG00000100554	ATP6V1D
ENSG00000238045.8	AC009133.12	MIMAT0003393	hsa-miR-425-5p	83700	ENSG00000166086	JAM3
ENSG00000238045.8	AC009133.12	MIMAT0003393	hsa-miR-425-5p	3576	ENSG00000169429	CXCL8
ENSG00000238045.8	AC009133.12	MIMAT0003393	hsa-miR-425-5p	4233	ENSG00000105976	MET
ENSG00000238045.8	AC009133.12	MIMAT0003393	hsa-miR-425-5p	50848	ENSG00000158769	F11R
ENSG00000238045.8	AC009133.12	MIMAT0003393	hsa-miR-425-5p	51382	ENSG00000100554	ATP6V1D
ENSG00000238045.8	AC009133.12	MIMAT0003393	hsa-miR-425-5p	1956	ENSG00000146648	EGFR
ENSG00000238287.1	RP11-656D10.3	MIMAT0000455	hsa-miR-185-5p	7082	ENSG00000277401	TJP1
ENSG00000238287.1	RP11-656D10.3	MIMAT0000455	hsa-miR-185-5p	1956	ENSG00000146648	EGFR
ENSG00000238287.1	RP11-656D10.3	MIMAT0000455	hsa-miR-185-5p	7082	ENSG00000104067	TJP1
ENSG00000238287.1	RP11-656D10.3	MIMAT0000455	hsa-miR-185-5p	4067	ENSG00000254087	LYN
ENSG00000238287.1	RP11-656D10.3	MIMAT0000455	hsa-miR-185-5p	3576	ENSG00000169429	CXCL8
ENSG00000239213.4	NCK1-AS1	MIMAT0000253	hsa-miR-10a-5p	50848	ENSG00000158769	F11R
ENSG00000239213.4	NCK1-AS1	MIMAT0000253	hsa-miR-10a-5p	3576	ENSG00000169429	CXCL8
ENSG00000239213.4	NCK1-AS1	MIMAT0000253	hsa-miR-10a-5p	83700	ENSG00000166086	JAM3
ENSG00000239213.4	NCK1-AS1	MIMAT0000253	hsa-miR-10a-5p	4233	ENSG00000105976	MET
ENSG00000239322.1	ATP6V1B1-AS1	MIMAT0000451	hsa-miR-150-5p	51382	ENSG00000100554	ATP6V1D
ENSG00000239322.1	ATP6V1B1-AS1	MIMAT0000451	hsa-miR-150-5p	9020	ENSG00000006062	MAP3K14
ENSG00000239322.1	ATP6V1B1-AS1	MIMAT0000451	hsa-miR-150-5p	4233	ENSG00000105976	MET
ENSG00000239322.1	ATP6V1B1-AS1	MIMAT0000451	hsa-miR-150-5p	9020	ENSG00000282637	MAP3K14
ENSG00000239335.4	LLPH-AS1	MIMAT0000085	hsa-miR-28-5p	83700	ENSG00000166086	JAM3
ENSG00000239335.4	LLPH-AS1	MIMAT0000085	hsa-miR-28-5p	50848	ENSG00000158769	F11R
ENSG00000239445.4	ST3GAL6-AS1	MIMAT0000753	hsa-miR-342-3p	7082	ENSG00000277401	TJP1
ENSG00000239445.4	ST3GAL6-AS1	MIMAT0000753	hsa-miR-342-3p	7082	ENSG00000104067	TJP1
ENSG00000239445.4	ST3GAL6-AS1	MIMAT0000753	hsa-miR-342-3p	50848	ENSG00000158769	F11R
ENSG00000239445.4	ST3GAL6-AS1	MIMAT0000753	hsa-miR-342-3p	3576	ENSG00000169429	CXCL8
ENSG00000239445.4	ST3GAL6-AS1	MIMAT0000753	hsa-miR-342-3p	1956	ENSG00000146648	EGFR
ENSG00000240758.2	RP11-155G14.6	MIMAT0000441	hsa-miR-9-5p	9020	ENSG00000282637	MAP3K14
ENSG00000240758.2	RP11-155G14.6	MIMAT0000441	hsa-miR-9-5p	7082	ENSG00000104067	TJP1
ENSG00000240758.2	RP11-155G14.6	MIMAT0000441	hsa-miR-9-5p	7082	ENSG00000277401	TJP1
ENSG00000240758.2	RP11-155G14.6	MIMAT0000441	hsa-miR-9-5p	50848	ENSG00000158769	F11R
ENSG00000240758.2	RP11-155G14.6	MIMAT0000441	hsa-miR-9-5p	83700	ENSG00000166086	JAM3
ENSG00000240758.2	RP11-155G14.6	MIMAT0000441	hsa-miR-9-5p	3725	ENSG00000177606	JUN
ENSG00000240758.2	RP11-155G14.6	MIMAT0000441	hsa-miR-9-5p	4233	ENSG00000105976	MET
ENSG00000240758.2	RP11-155G14.6	MIMAT0000441	hsa-miR-9-5p	9020	ENSG00000006062	MAP3K14
ENSG00000241158.4	ADAMTS9-AS1	MIMAT0000756	hsa-miR-326	83700	ENSG00000166086	JAM3
ENSG00000241158.4	ADAMTS9-AS1	MIMAT0000756	hsa-miR-326	9020	ENSG00000006062	MAP3K14
ENSG00000241158.4	ADAMTS9-AS1	MIMAT0000756	hsa-miR-326	1956	ENSG00000146648	EGFR
ENSG00000241158.4	ADAMTS9-AS1	MIMAT0000756	hsa-miR-326	50848	ENSG00000158769	F11R
ENSG00000241158.4	ADAMTS9-AS1	MIMAT0000756	hsa-miR-326	4233	ENSG00000105976	MET
ENSG00000241158.4	ADAMTS9-AS1	MIMAT0000756	hsa-miR-326	9020	ENSG00000282637	MAP3K14
ENSG00000241280.1	RP11-221J22.2	MIMAT0002175	hsa-miR-485-5p	4233	ENSG00000105976	MET
ENSG00000241280.1	RP11-221J22.2	MIMAT0002175	hsa-miR-485-5p	9020	ENSG00000006062	MAP3K14
ENSG00000241280.1	RP11-221J22.2	MIMAT0002175	hsa-miR-485-5p	83700	ENSG00000166086	JAM3
ENSG00000241280.1	RP11-221J22.2	MIMAT0002175	hsa-miR-485-5p	9020	ENSG00000282637	MAP3K14
ENSG00000241684.4	ADAMTS9-AS2	MIMAT0002807	hsa-miR-491-5p	9020	ENSG00000006062	MAP3K14
ENSG00000241684.4	ADAMTS9-AS2	MIMAT0002807	hsa-miR-491-5p	9020	ENSG00000282637	MAP3K14
ENSG00000241684.4	ADAMTS9-AS2	MIMAT0002807	hsa-miR-491-5p	4233	ENSG00000105976	MET
ENSG00000241684.4	ADAMTS9-AS2	MIMAT0002807	hsa-miR-491-5p	50848	ENSG00000158769	F11R
ENSG00000241684.4	ADAMTS9-AS2	MIMAT0002807	hsa-miR-491-5p	1956	ENSG00000146648	EGFR
ENSG00000241886.1	RP11-242C19.2	MIMAT0000085	hsa-miR-28-5p	50848	ENSG00000158769	F11R
ENSG00000241886.1	RP11-242C19.2	MIMAT0000085	hsa-miR-28-5p	83700	ENSG00000166086	JAM3
ENSG00000241985.1	WWTR1-IT1	MIMAT0003294	hsa-miR-625-5p	1956	ENSG00000146648	EGFR
ENSG00000241985.1	WWTR1-IT1	MIMAT0003294	hsa-miR-625-5p	3725	ENSG00000177606	JUN
ENSG00000242282.5	AC108488.4	MIMAT0000099	hsa-miR-101-3p	4233	ENSG00000105976	MET
ENSG00000242282.5	AC108488.4	MIMAT0000099	hsa-miR-101-3p	83700	ENSG00000166086	JAM3
ENSG00000242282.5	AC108488.4	MIMAT0000099	hsa-miR-101-3p	51382	ENSG00000100554	ATP6V1D
ENSG00000242282.5	AC108488.4	MIMAT0000099	hsa-miR-101-3p	50848	ENSG00000158769	F11R
ENSG00000242282.5	AC108488.4	MIMAT0000099	hsa-miR-101-3p	7082	ENSG00000104067	TJP1
ENSG00000242282.5	AC108488.4	MIMAT0000099	hsa-miR-101-3p	1956	ENSG00000146648	EGFR
ENSG00000242282.5	AC108488.4	MIMAT0000099	hsa-miR-101-3p	3725	ENSG00000177606	JUN
ENSG00000242282.5	AC108488.4	MIMAT0000099	hsa-miR-101-3p	7082	ENSG00000277401	TJP1
ENSG00000242282.5	AC108488.4	MIMAT0000099	hsa-miR-101-3p	3576	ENSG00000169429	CXCL8
ENSG00000242759.5	LINC00882	MIMAT0000068	hsa-miR-15a-5p	10312	ENSG00000110719	TCIRG1
ENSG00000242759.5	LINC00882	MIMAT0000068	hsa-miR-15a-5p	50848	ENSG00000158769	F11R
ENSG00000242759.5	LINC00882	MIMAT0000068	hsa-miR-15a-5p	83700	ENSG00000166086	JAM3
ENSG00000242759.5	LINC00882	MIMAT0000068	hsa-miR-15a-5p	9020	ENSG00000006062	MAP3K14
ENSG00000242759.5	LINC00882	MIMAT0000068	hsa-miR-15a-5p	9020	ENSG00000282637	MAP3K14
ENSG00000242759.5	LINC00882	MIMAT0000068	hsa-miR-15a-5p	1956	ENSG00000146648	EGFR
ENSG00000243069.6	ARHGEF26-AS1	MIMAT0000068	hsa-miR-15a-5p	10312	ENSG00000110719	TCIRG1
ENSG00000243069.6	ARHGEF26-AS1	MIMAT0000068	hsa-miR-15a-5p	50848	ENSG00000158769	F11R
ENSG00000243069.6	ARHGEF26-AS1	MIMAT0000068	hsa-miR-15a-5p	1956	ENSG00000146648	EGFR
ENSG00000243069.6	ARHGEF26-AS1	MIMAT0000068	hsa-miR-15a-5p	9020	ENSG00000282637	MAP3K14
ENSG00000243069.6	ARHGEF26-AS1	MIMAT0000068	hsa-miR-15a-5p	83700	ENSG00000166086	JAM3
ENSG00000243069.6	ARHGEF26-AS1	MIMAT0000068	hsa-miR-15a-5p	9020	ENSG00000006062	MAP3K14
ENSG00000243766.6	HOTTIP	MIMAT0000442	hsa-miR-9-3p	1956	ENSG00000146648	EGFR
ENSG00000244184.1	RP11-314A20.2	MIMAT0000259	hsa-miR-182-5p	9020	ENSG00000006062	MAP3K14
ENSG00000244184.1	RP11-314A20.2	MIMAT0000259	hsa-miR-182-5p	51382	ENSG00000100554	ATP6V1D
ENSG00000244184.1	RP11-314A20.2	MIMAT0000259	hsa-miR-182-5p	9020	ENSG00000282637	MAP3K14
ENSG00000244184.1	RP11-314A20.2	MIMAT0000259	hsa-miR-182-5p	50848	ENSG00000158769	F11R
ENSG00000244184.1	RP11-314A20.2	MIMAT0000259	hsa-miR-182-5p	4233	ENSG00000105976	MET
ENSG00000244468.1	RP11-206M11.7	MIMAT0004953	hsa-miR-873-5p	50848	ENSG00000158769	F11R
ENSG00000244468.1	RP11-206M11.7	MIMAT0004953	hsa-miR-873-5p	2919	ENSG00000163739	CXCL1
ENSG00000244468.1	RP11-206M11.7	MIMAT0004953	hsa-miR-873-5p	10312	ENSG00000110719	TCIRG1
ENSG00000244468.1	RP11-206M11.7	MIMAT0004953	hsa-miR-873-5p	51382	ENSG00000100554	ATP6V1D
ENSG00000244468.1	RP11-206M11.7	MIMAT0004953	hsa-miR-873-5p	1956	ENSG00000146648	EGFR
ENSG00000244468.1	RP11-206M11.7	MIMAT0004953	hsa-miR-873-5p	83700	ENSG00000166086	JAM3
ENSG00000244468.1	RP11-206M11.7	MIMAT0004953	hsa-miR-873-5p	3576	ENSG00000169429	CXCL8
ENSG00000244953.1	RP11-613D13.8	MIMAT0000072	hsa-miR-18a-5p	4792	ENSG00000100906	NFKBIA
ENSG00000244953.1	RP11-613D13.8	MIMAT0000072	hsa-miR-18a-5p	50848	ENSG00000158769	F11R
ENSG00000244953.1	RP11-613D13.8	MIMAT0000072	hsa-miR-18a-5p	83700	ENSG00000166086	JAM3
ENSG00000244968.5	LIFR-AS1	MIMAT0000068	hsa-miR-15a-5p	9020	ENSG00000282637	MAP3K14
ENSG00000244968.5	LIFR-AS1	MIMAT0000068	hsa-miR-15a-5p	9020	ENSG00000006062	MAP3K14
ENSG00000244968.5	LIFR-AS1	MIMAT0000068	hsa-miR-15a-5p	50848	ENSG00000158769	F11R
ENSG00000244968.5	LIFR-AS1	MIMAT0000068	hsa-miR-15a-5p	1956	ENSG00000146648	EGFR
ENSG00000244968.5	LIFR-AS1	MIMAT0000068	hsa-miR-15a-5p	10312	ENSG00000110719	TCIRG1
ENSG00000244968.5	LIFR-AS1	MIMAT0000068	hsa-miR-15a-5p	83700	ENSG00000166086	JAM3
ENSG00000245598.5	DACT3-AS1	MIMAT0000068	hsa-miR-15a-5p	83700	ENSG00000166086	JAM3
ENSG00000245598.5	DACT3-AS1	MIMAT0000068	hsa-miR-15a-5p	9020	ENSG00000282637	MAP3K14
ENSG00000245598.5	DACT3-AS1	MIMAT0000068	hsa-miR-15a-5p	9020	ENSG00000006062	MAP3K14
ENSG00000245598.5	DACT3-AS1	MIMAT0000068	hsa-miR-15a-5p	50848	ENSG00000158769	F11R
ENSG00000245598.5	DACT3-AS1	MIMAT0000068	hsa-miR-15a-5p	10312	ENSG00000110719	TCIRG1
ENSG00000245598.5	DACT3-AS1	MIMAT0000068	hsa-miR-15a-5p	1956	ENSG00000146648	EGFR
ENSG00000247572.6	CKMT2-AS1	MIMAT0000736	hsa-miR-381-3p	50848	ENSG00000158769	F11R
ENSG00000247572.6	CKMT2-AS1	MIMAT0000736	hsa-miR-381-3p	4792	ENSG00000100906	NFKBIA
ENSG00000247572.6	CKMT2-AS1	MIMAT0000736	hsa-miR-381-3p	7082	ENSG00000104067	TJP1
ENSG00000247572.6	CKMT2-AS1	MIMAT0000736	hsa-miR-381-3p	7082	ENSG00000277401	TJP1
ENSG00000247572.6	CKMT2-AS1	MIMAT0000736	hsa-miR-381-3p	3725	ENSG00000177606	JUN
ENSG00000247572.6	CKMT2-AS1	MIMAT0000736	hsa-miR-381-3p	3576	ENSG00000169429	CXCL8
ENSG00000247572.6	CKMT2-AS1	MIMAT0000736	hsa-miR-381-3p	4233	ENSG00000105976	MET
ENSG00000247624.5	CPEB2-AS1	MIMAT0000243	hsa-miR-148a-3p	4233	ENSG00000105976	MET
ENSG00000247624.5	CPEB2-AS1	MIMAT0000243	hsa-miR-148a-3p	9020	ENSG00000282637	MAP3K14
ENSG00000247624.5	CPEB2-AS1	MIMAT0000243	hsa-miR-148a-3p	83700	ENSG00000166086	JAM3
ENSG00000247624.5	CPEB2-AS1	MIMAT0000243	hsa-miR-148a-3p	9020	ENSG00000006062	MAP3K14
ENSG00000247624.5	CPEB2-AS1	MIMAT0000243	hsa-miR-148a-3p	1956	ENSG00000146648	EGFR
ENSG00000247809.6	NR2F2-AS1	MIMAT0000073	hsa-miR-19a-3p	4067	ENSG00000254087	LYN
ENSG00000247809.6	NR2F2-AS1	MIMAT0000073	hsa-miR-19a-3p	4233	ENSG00000105976	MET
ENSG00000247809.6	NR2F2-AS1	MIMAT0000073	hsa-miR-19a-3p	9020	ENSG00000282637	MAP3K14
ENSG00000247809.6	NR2F2-AS1	MIMAT0000073	hsa-miR-19a-3p	9020	ENSG00000006062	MAP3K14
ENSG00000247809.6	NR2F2-AS1	MIMAT0000073	hsa-miR-19a-3p	5602	ENSG00000109339	MAPK10
ENSG00000247809.6	NR2F2-AS1	MIMAT0000073	hsa-miR-19a-3p	3576	ENSG00000169429	CXCL8
ENSG00000248240.1	RP11-159F24.5	MIMAT0000231	hsa-miR-199a-5p	50848	ENSG00000158769	F11R
ENSG00000248240.1	RP11-159F24.5	MIMAT0000231	hsa-miR-199a-5p	58494	ENSG00000154721	JAM2
ENSG00000248240.1	RP11-159F24.5	MIMAT0000231	hsa-miR-199a-5p	2919	ENSG00000163739	CXCL1
ENSG00000248240.1	RP11-159F24.5	MIMAT0000231	hsa-miR-199a-5p	4067	ENSG00000254087	LYN
ENSG00000248240.1	RP11-159F24.5	MIMAT0000231	hsa-miR-199a-5p	51382	ENSG00000100554	ATP6V1D
ENSG00000248240.1	RP11-159F24.5	MIMAT0000231	hsa-miR-199a-5p	83700	ENSG00000166086	JAM3
ENSG00000248668.2	OXCT1-AS1	MIMAT0000427	hsa-miR-133a-3p	3725	ENSG00000177606	JUN
ENSG00000248668.2	OXCT1-AS1	MIMAT0000427	hsa-miR-133a-3p	4233	ENSG00000105976	MET
ENSG00000248668.2	OXCT1-AS1	MIMAT0000427	hsa-miR-133a-3p	9020	ENSG00000006062	MAP3K14
ENSG00000248668.2	OXCT1-AS1	MIMAT0000427	hsa-miR-133a-3p	9020	ENSG00000282637	MAP3K14
ENSG00000248668.2	OXCT1-AS1	MIMAT0000427	hsa-miR-133a-3p	1956	ENSG00000146648	EGFR
ENSG00000248773.1	RP11-231L11.3	MIMAT0000459	hsa-miR-193a-3p	7082	ENSG00000104067	TJP1
ENSG00000248773.1	RP11-231L11.3	MIMAT0000459	hsa-miR-193a-3p	5602	ENSG00000109339	MAPK10
ENSG00000248773.1	RP11-231L11.3	MIMAT0000459	hsa-miR-193a-3p	83700	ENSG00000166086	JAM3
ENSG00000248773.1	RP11-231L11.3	MIMAT0000459	hsa-miR-193a-3p	1956	ENSG00000146648	EGFR
ENSG00000248773.1	RP11-231L11.3	MIMAT0000459	hsa-miR-193a-3p	4233	ENSG00000105976	MET
ENSG00000248773.1	RP11-231L11.3	MIMAT0000459	hsa-miR-193a-3p	3576	ENSG00000169429	CXCL8
ENSG00000248773.1	RP11-231L11.3	MIMAT0000459	hsa-miR-193a-3p	7082	ENSG00000277401	TJP1
ENSG00000248844.5	RP11-626H12.3	MIMAT0000073	hsa-miR-19a-3p	4233	ENSG00000105976	MET
ENSG00000248844.5	RP11-626H12.3	MIMAT0000073	hsa-miR-19a-3p	9020	ENSG00000006062	MAP3K14
ENSG00000248844.5	RP11-626H12.3	MIMAT0000073	hsa-miR-19a-3p	5602	ENSG00000109339	MAPK10
ENSG00000248844.5	RP11-626H12.3	MIMAT0000073	hsa-miR-19a-3p	9020	ENSG00000282637	MAP3K14
ENSG00000248844.5	RP11-626H12.3	MIMAT0000073	hsa-miR-19a-3p	4067	ENSG00000254087	LYN
ENSG00000248844.5	RP11-626H12.3	MIMAT0000073	hsa-miR-19a-3p	3576	ENSG00000169429	CXCL8
ENSG00000248994.1	RP11-259O2.1	MIMAT0000752	hsa-miR-328-3p	50848	ENSG00000158769	F11R
ENSG00000248994.1	RP11-259O2.1	MIMAT0000752	hsa-miR-328-3p	3576	ENSG00000169429	CXCL8
ENSG00000249001.4	RP11-742B18.1	MIMAT0004784	hsa-miR-455-3p	3725	ENSG00000177606	JUN
ENSG00000249001.4	RP11-742B18.1	MIMAT0004784	hsa-miR-455-3p	7082	ENSG00000277401	TJP1
ENSG00000249001.4	RP11-742B18.1	MIMAT0004784	hsa-miR-455-3p	7082	ENSG00000104067	TJP1
ENSG00000249001.4	RP11-742B18.1	MIMAT0004784	hsa-miR-455-3p	1956	ENSG00000146648	EGFR
ENSG00000249096.5	RP11-290F5.1	MIMAT0000243	hsa-miR-148a-3p	83700	ENSG00000166086	JAM3
ENSG00000249096.5	RP11-290F5.1	MIMAT0000243	hsa-miR-148a-3p	4233	ENSG00000105976	MET
ENSG00000249096.5	RP11-290F5.1	MIMAT0000243	hsa-miR-148a-3p	9020	ENSG00000006062	MAP3K14
ENSG00000249096.5	RP11-290F5.1	MIMAT0000243	hsa-miR-148a-3p	9020	ENSG00000282637	MAP3K14
ENSG00000249096.5	RP11-290F5.1	MIMAT0000243	hsa-miR-148a-3p	1956	ENSG00000146648	EGFR
ENSG00000249395.2	CASC9	MIMAT0022714	hsa-miR-766-5p	50848	ENSG00000158769	F11R
ENSG00000249395.2	CASC9	MIMAT0022714	hsa-miR-766-5p	3725	ENSG00000177606	JUN
ENSG00000249395.2	CASC9	MIMAT0022714	hsa-miR-766-5p	9020	ENSG00000006062	MAP3K14
ENSG00000249395.2	CASC9	MIMAT0022714	hsa-miR-766-5p	1956	ENSG00000146648	EGFR
ENSG00000249395.2	CASC9	MIMAT0022714	hsa-miR-766-5p	7082	ENSG00000277401	TJP1
ENSG00000249395.2	CASC9	MIMAT0022714	hsa-miR-766-5p	7082	ENSG00000104067	TJP1
ENSG00000249395.2	CASC9	MIMAT0022714	hsa-miR-766-5p	9020	ENSG00000282637	MAP3K14
ENSG00000249413.2	RP11-25H12.1	MIMAT0000085	hsa-miR-28-5p	50848	ENSG00000158769	F11R
ENSG00000249413.2	RP11-25H12.1	MIMAT0000085	hsa-miR-28-5p	83700	ENSG00000166086	JAM3
ENSG00000249550.5	LINC01234	MIMAT0000068	hsa-miR-15a-5p	50848	ENSG00000158769	F11R
ENSG00000249550.5	LINC01234	MIMAT0000068	hsa-miR-15a-5p	1956	ENSG00000146648	EGFR
ENSG00000249550.5	LINC01234	MIMAT0000068	hsa-miR-15a-5p	10312	ENSG00000110719	TCIRG1
ENSG00000249550.5	LINC01234	MIMAT0000068	hsa-miR-15a-5p	83700	ENSG00000166086	JAM3
ENSG00000249550.5	LINC01234	MIMAT0000068	hsa-miR-15a-5p	9020	ENSG00000282637	MAP3K14
ENSG00000249550.5	LINC01234	MIMAT0000068	hsa-miR-15a-5p	9020	ENSG00000006062	MAP3K14
ENSG00000249684.4	RP11-423H2.3	MIMAT0000243	hsa-miR-148a-3p	9020	ENSG00000006062	MAP3K14
ENSG00000249684.4	RP11-423H2.3	MIMAT0000243	hsa-miR-148a-3p	1956	ENSG00000146648	EGFR
ENSG00000249684.4	RP11-423H2.3	MIMAT0000243	hsa-miR-148a-3p	83700	ENSG00000166086	JAM3
ENSG00000249684.4	RP11-423H2.3	MIMAT0000243	hsa-miR-148a-3p	9020	ENSG00000282637	MAP3K14
ENSG00000249684.4	RP11-423H2.3	MIMAT0000243	hsa-miR-148a-3p	4233	ENSG00000105976	MET
ENSG00000249746.1	RP11-254I22.3	MIMAT0000068	hsa-miR-15a-5p	9020	ENSG00000006062	MAP3K14
ENSG00000249746.1	RP11-254I22.3	MIMAT0000068	hsa-miR-15a-5p	10312	ENSG00000110719	TCIRG1
ENSG00000249746.1	RP11-254I22.3	MIMAT0000068	hsa-miR-15a-5p	50848	ENSG00000158769	F11R
ENSG00000249746.1	RP11-254I22.3	MIMAT0000068	hsa-miR-15a-5p	83700	ENSG00000166086	JAM3
ENSG00000249746.1	RP11-254I22.3	MIMAT0000068	hsa-miR-15a-5p	1956	ENSG00000146648	EGFR
ENSG00000249746.1	RP11-254I22.3	MIMAT0000068	hsa-miR-15a-5p	9020	ENSG00000282637	MAP3K14
ENSG00000250241.4	RP11-9G1.3	MIMAT0000231	hsa-miR-199a-5p	83700	ENSG00000166086	JAM3
ENSG00000250241.4	RP11-9G1.3	MIMAT0000231	hsa-miR-199a-5p	2919	ENSG00000163739	CXCL1
ENSG00000250241.4	RP11-9G1.3	MIMAT0000231	hsa-miR-199a-5p	51382	ENSG00000100554	ATP6V1D
ENSG00000250241.4	RP11-9G1.3	MIMAT0000231	hsa-miR-199a-5p	4067	ENSG00000254087	LYN
ENSG00000250241.4	RP11-9G1.3	MIMAT0000231	hsa-miR-199a-5p	50848	ENSG00000158769	F11R
ENSG00000250241.4	RP11-9G1.3	MIMAT0000231	hsa-miR-199a-5p	58494	ENSG00000154721	JAM2
ENSG00000250320.4	CTD-2269F5.1	MIMAT0003244	hsa-miR-579-3p	1956	ENSG00000146648	EGFR
ENSG00000250320.4	CTD-2269F5.1	MIMAT0003244	hsa-miR-579-3p	3576	ENSG00000169429	CXCL8
ENSG00000250320.4	CTD-2269F5.1	MIMAT0003244	hsa-miR-579-3p	50848	ENSG00000158769	F11R
ENSG00000250320.4	CTD-2269F5.1	MIMAT0003244	hsa-miR-579-3p	51382	ENSG00000100554	ATP6V1D
ENSG00000250320.4	CTD-2269F5.1	MIMAT0003244	hsa-miR-579-3p	4233	ENSG00000105976	MET
ENSG00000250320.4	CTD-2269F5.1	MIMAT0003244	hsa-miR-579-3p	2919	ENSG00000163739	CXCL1
ENSG00000250337.4	LINC01021	MIMAT0002874	hsa-miR-503-5p	9020	ENSG00000282637	MAP3K14
ENSG00000250337.4	LINC01021	MIMAT0002874	hsa-miR-503-5p	50848	ENSG00000158769	F11R
ENSG00000250337.4	LINC01021	MIMAT0002874	hsa-miR-503-5p	83700	ENSG00000166086	JAM3
ENSG00000250337.4	LINC01021	MIMAT0002874	hsa-miR-503-5p	9020	ENSG00000006062	MAP3K14
ENSG00000250337.4	LINC01021	MIMAT0002874	hsa-miR-503-5p	1956	ENSG00000146648	EGFR
ENSG00000250790.4	RP11-46H11.3	MIMAT0000072	hsa-miR-18a-5p	50848	ENSG00000158769	F11R
ENSG00000250790.4	RP11-46H11.3	MIMAT0000072	hsa-miR-18a-5p	4792	ENSG00000100906	NFKBIA
ENSG00000250790.4	RP11-46H11.3	MIMAT0000072	hsa-miR-18a-5p	83700	ENSG00000166086	JAM3
ENSG00000250874.1	CTC-480C2.1	MIMAT0003393	hsa-miR-425-5p	51382	ENSG00000100554	ATP6V1D
ENSG00000250874.1	CTC-480C2.1	MIMAT0003393	hsa-miR-425-5p	4233	ENSG00000105976	MET
ENSG00000250874.1	CTC-480C2.1	MIMAT0003393	hsa-miR-425-5p	3576	ENSG00000169429	CXCL8
ENSG00000250874.1	CTC-480C2.1	MIMAT0003393	hsa-miR-425-5p	50848	ENSG00000158769	F11R
ENSG00000250874.1	CTC-480C2.1	MIMAT0003393	hsa-miR-425-5p	83700	ENSG00000166086	JAM3
ENSG00000250874.1	CTC-480C2.1	MIMAT0003393	hsa-miR-425-5p	1956	ENSG00000146648	EGFR
ENSG00000250917.1	RP4-785G19.5	MIMAT0000073	hsa-miR-19a-3p	9020	ENSG00000006062	MAP3K14
ENSG00000250917.1	RP4-785G19.5	MIMAT0000073	hsa-miR-19a-3p	4233	ENSG00000105976	MET
ENSG00000250917.1	RP4-785G19.5	MIMAT0000073	hsa-miR-19a-3p	5602	ENSG00000109339	MAPK10
ENSG00000250917.1	RP4-785G19.5	MIMAT0000073	hsa-miR-19a-3p	3576	ENSG00000169429	CXCL8
ENSG00000250917.1	RP4-785G19.5	MIMAT0000073	hsa-miR-19a-3p	4067	ENSG00000254087	LYN
ENSG00000250917.1	RP4-785G19.5	MIMAT0000073	hsa-miR-19a-3p	9020	ENSG00000282637	MAP3K14
ENSG00000251442.4	LINC01094	MIMAT0002175	hsa-miR-485-5p	83700	ENSG00000166086	JAM3
ENSG00000251442.4	LINC01094	MIMAT0002175	hsa-miR-485-5p	9020	ENSG00000282637	MAP3K14
ENSG00000251442.4	LINC01094	MIMAT0002175	hsa-miR-485-5p	4233	ENSG00000105976	MET
ENSG00000251442.4	LINC01094	MIMAT0002175	hsa-miR-485-5p	9020	ENSG00000006062	MAP3K14
ENSG00000253174.2	RP11-360L9.7	MIMAT0000243	hsa-miR-148a-3p	83700	ENSG00000166086	JAM3
ENSG00000253174.2	RP11-360L9.7	MIMAT0000243	hsa-miR-148a-3p	4233	ENSG00000105976	MET
ENSG00000253174.2	RP11-360L9.7	MIMAT0000243	hsa-miR-148a-3p	9020	ENSG00000282637	MAP3K14
ENSG00000253174.2	RP11-360L9.7	MIMAT0000243	hsa-miR-148a-3p	9020	ENSG00000006062	MAP3K14
ENSG00000253174.2	RP11-360L9.7	MIMAT0000243	hsa-miR-148a-3p	1956	ENSG00000146648	EGFR
ENSG00000253187.2	HOXA10-AS	MIMAT0000259	hsa-miR-182-5p	9020	ENSG00000006062	MAP3K14
ENSG00000253187.2	HOXA10-AS	MIMAT0000259	hsa-miR-182-5p	50848	ENSG00000158769	F11R
ENSG00000253187.2	HOXA10-AS	MIMAT0000259	hsa-miR-182-5p	51382	ENSG00000100554	ATP6V1D
ENSG00000253187.2	HOXA10-AS	MIMAT0000259	hsa-miR-182-5p	9020	ENSG00000282637	MAP3K14
ENSG00000253187.2	HOXA10-AS	MIMAT0000259	hsa-miR-182-5p	4233	ENSG00000105976	MET
ENSG00000253438.2	PCAT1	MIMAT0000087	hsa-miR-30a-5p	4067	ENSG00000254087	LYN
ENSG00000253438.2	PCAT1	MIMAT0000087	hsa-miR-30a-5p	3725	ENSG00000177606	JUN
ENSG00000253438.2	PCAT1	MIMAT0000087	hsa-miR-30a-5p	83700	ENSG00000166086	JAM3
ENSG00000253438.2	PCAT1	MIMAT0000087	hsa-miR-30a-5p	1956	ENSG00000146648	EGFR
ENSG00000253552.6	HOXA-AS2	MIMAT0000087	hsa-miR-30a-5p	1956	ENSG00000146648	EGFR
ENSG00000253552.6	HOXA-AS2	MIMAT0000087	hsa-miR-30a-5p	4067	ENSG00000254087	LYN
ENSG00000253552.6	HOXA-AS2	MIMAT0000087	hsa-miR-30a-5p	83700	ENSG00000166086	JAM3
ENSG00000253552.6	HOXA-AS2	MIMAT0000087	hsa-miR-30a-5p	3725	ENSG00000177606	JUN
ENSG00000253586.1	RP11-723D22.2	MIMAT0000072	hsa-miR-18a-5p	4792	ENSG00000100906	NFKBIA
ENSG00000253586.1	RP11-723D22.2	MIMAT0000072	hsa-miR-18a-5p	50848	ENSG00000158769	F11R
ENSG00000253586.1	RP11-723D22.2	MIMAT0000072	hsa-miR-18a-5p	83700	ENSG00000166086	JAM3
ENSG00000253973.2	RP11-467K18.2	MIMAT0000068	hsa-miR-15a-5p	9020	ENSG00000282637	MAP3K14
ENSG00000253973.2	RP11-467K18.2	MIMAT0000068	hsa-miR-15a-5p	50848	ENSG00000158769	F11R
ENSG00000253973.2	RP11-467K18.2	MIMAT0000068	hsa-miR-15a-5p	9020	ENSG00000006062	MAP3K14
ENSG00000253973.2	RP11-467K18.2	MIMAT0000068	hsa-miR-15a-5p	1956	ENSG00000146648	EGFR
ENSG00000253973.2	RP11-467K18.2	MIMAT0000068	hsa-miR-15a-5p	83700	ENSG00000166086	JAM3
ENSG00000253973.2	RP11-467K18.2	MIMAT0000068	hsa-miR-15a-5p	10312	ENSG00000110719	TCIRG1
ENSG00000254027.1	RP11-363E6.3	MIMAT0000431	hsa-miR-140-5p	7082	ENSG00000104067	TJP1
ENSG00000254027.1	RP11-363E6.3	MIMAT0000431	hsa-miR-140-5p	9020	ENSG00000006062	MAP3K14
ENSG00000254027.1	RP11-363E6.3	MIMAT0000431	hsa-miR-140-5p	4233	ENSG00000105976	MET
ENSG00000254027.1	RP11-363E6.3	MIMAT0000431	hsa-miR-140-5p	7082	ENSG00000277401	TJP1
ENSG00000254027.1	RP11-363E6.3	MIMAT0000431	hsa-miR-140-5p	9020	ENSG00000282637	MAP3K14
ENSG00000254027.1	RP11-363E6.3	MIMAT0000431	hsa-miR-140-5p	50848	ENSG00000158769	F11R
ENSG00000254027.1	RP11-363E6.3	MIMAT0000431	hsa-miR-140-5p	83700	ENSG00000166086	JAM3
ENSG00000254034.1	RP11-662B19.2	MIMAT0000085	hsa-miR-28-5p	83700	ENSG00000166086	JAM3
ENSG00000254034.1	RP11-662B19.2	MIMAT0000085	hsa-miR-28-5p	50848	ENSG00000158769	F11R
ENSG00000254094.1	AC078852.1	MIMAT0000434	hsa-miR-142-3p	7082	ENSG00000277401	TJP1
ENSG00000254094.1	AC078852.1	MIMAT0000434	hsa-miR-142-3p	7082	ENSG00000104067	TJP1
ENSG00000254094.1	AC078852.1	MIMAT0000434	hsa-miR-142-3p	83700	ENSG00000166086	JAM3
ENSG00000254141.1	RP11-642D21.1	MIMAT0000271	hsa-miR-214-3p	9020	ENSG00000282637	MAP3K14
ENSG00000254141.1	RP11-642D21.1	MIMAT0000271	hsa-miR-214-3p	9020	ENSG00000006062	MAP3K14
ENSG00000254141.1	RP11-642D21.1	MIMAT0000271	hsa-miR-214-3p	50848	ENSG00000158769	F11R
ENSG00000254141.1	RP11-642D21.1	MIMAT0000271	hsa-miR-214-3p	83700	ENSG00000166086	JAM3
ENSG00000254154.7	RP4-798P15.3	MIMAT0000068	hsa-miR-15a-5p	1956	ENSG00000146648	EGFR
ENSG00000254154.7	RP4-798P15.3	MIMAT0000068	hsa-miR-15a-5p	9020	ENSG00000006062	MAP3K14
ENSG00000254154.7	RP4-798P15.3	MIMAT0000068	hsa-miR-15a-5p	50848	ENSG00000158769	F11R
ENSG00000254154.7	RP4-798P15.3	MIMAT0000068	hsa-miR-15a-5p	10312	ENSG00000110719	TCIRG1
ENSG00000254154.7	RP4-798P15.3	MIMAT0000068	hsa-miR-15a-5p	9020	ENSG00000282637	MAP3K14
ENSG00000254154.7	RP4-798P15.3	MIMAT0000068	hsa-miR-15a-5p	83700	ENSG00000166086	JAM3
ENSG00000254343.2	RP11-760H22.2	MIMAT0000068	hsa-miR-15a-5p	9020	ENSG00000006062	MAP3K14
ENSG00000254343.2	RP11-760H22.2	MIMAT0000068	hsa-miR-15a-5p	50848	ENSG00000158769	F11R
ENSG00000254343.2	RP11-760H22.2	MIMAT0000068	hsa-miR-15a-5p	9020	ENSG00000282637	MAP3K14
ENSG00000254343.2	RP11-760H22.2	MIMAT0000068	hsa-miR-15a-5p	83700	ENSG00000166086	JAM3
ENSG00000254343.2	RP11-760H22.2	MIMAT0000068	hsa-miR-15a-5p	1956	ENSG00000146648	EGFR
ENSG00000254343.2	RP11-760H22.2	MIMAT0000068	hsa-miR-15a-5p	10312	ENSG00000110719	TCIRG1
ENSG00000254539.1	RP4-791M13.3	MIMAT0000752	hsa-miR-328-3p	50848	ENSG00000158769	F11R
ENSG00000254539.1	RP4-791M13.3	MIMAT0000752	hsa-miR-328-3p	3576	ENSG00000169429	CXCL8
ENSG00000254561.3	RP11-196E1.3	MIMAT0000076	hsa-miR-21-5p	5602	ENSG00000109339	MAPK10
ENSG00000254756.1	RP11-867G23.12	MIMAT0000278	hsa-miR-221-3p	1956	ENSG00000146648	EGFR
ENSG00000254756.1	RP11-867G23.12	MIMAT0000278	hsa-miR-221-3p	83700	ENSG00000166086	JAM3
ENSG00000254756.1	RP11-867G23.12	MIMAT0000278	hsa-miR-221-3p	4067	ENSG00000254087	LYN
ENSG00000254815.4	RP11-496I9.1	MIMAT0000085	hsa-miR-28-5p	50848	ENSG00000158769	F11R
ENSG00000254815.4	RP11-496I9.1	MIMAT0000085	hsa-miR-28-5p	83700	ENSG00000166086	JAM3
ENSG00000255384.1	RP11-770J1.4	MIMAT0003161	hsa-miR-493-3p	83700	ENSG00000166086	JAM3
ENSG00000255384.1	RP11-770J1.4	MIMAT0003161	hsa-miR-493-3p	1956	ENSG00000146648	EGFR
ENSG00000255394.4	C8orf49	MIMAT0000232	hsa-miR-199a-3p	50848	ENSG00000158769	F11R
ENSG00000255394.4	C8orf49	MIMAT0000232	hsa-miR-199a-3p	4233	ENSG00000105976	MET
ENSG00000255394.4	C8orf49	MIMAT0000232	hsa-miR-199a-3p	7082	ENSG00000277401	TJP1
ENSG00000255394.4	C8orf49	MIMAT0000232	hsa-miR-199a-3p	7082	ENSG00000104067	TJP1
ENSG00000255441.1	CTD-2616J11.2	MIMAT0000752	hsa-miR-328-3p	3576	ENSG00000169429	CXCL8
ENSG00000255441.1	CTD-2616J11.2	MIMAT0000752	hsa-miR-328-3p	50848	ENSG00000158769	F11R
ENSG00000255468.5	RP11-867G23.8	MIMAT0000271	hsa-miR-214-3p	83700	ENSG00000166086	JAM3
ENSG00000255468.5	RP11-867G23.8	MIMAT0000271	hsa-miR-214-3p	50848	ENSG00000158769	F11R
ENSG00000255468.5	RP11-867G23.8	MIMAT0000271	hsa-miR-214-3p	9020	ENSG00000282637	MAP3K14
ENSG00000255468.5	RP11-867G23.8	MIMAT0000271	hsa-miR-214-3p	9020	ENSG00000006062	MAP3K14
ENSG00000255559.1	ZNF252P-AS1	MIMAT0000710	hsa-miR-365a-3p	7082	ENSG00000277401	TJP1
ENSG00000255559.1	ZNF252P-AS1	MIMAT0000710	hsa-miR-365a-3p	7082	ENSG00000104067	TJP1
ENSG00000255727.1	LINC01489	MIMAT0000099	hsa-miR-101-3p	7082	ENSG00000104067	TJP1
ENSG00000255727.1	LINC01489	MIMAT0000099	hsa-miR-101-3p	50848	ENSG00000158769	F11R
ENSG00000255727.1	LINC01489	MIMAT0000099	hsa-miR-101-3p	1956	ENSG00000146648	EGFR
ENSG00000255727.1	LINC01489	MIMAT0000099	hsa-miR-101-3p	4233	ENSG00000105976	MET
ENSG00000255727.1	LINC01489	MIMAT0000099	hsa-miR-101-3p	3725	ENSG00000177606	JUN
ENSG00000255727.1	LINC01489	MIMAT0000099	hsa-miR-101-3p	7082	ENSG00000277401	TJP1
ENSG00000255727.1	LINC01489	MIMAT0000099	hsa-miR-101-3p	3576	ENSG00000169429	CXCL8
ENSG00000255727.1	LINC01489	MIMAT0000099	hsa-miR-101-3p	83700	ENSG00000166086	JAM3
ENSG00000255727.1	LINC01489	MIMAT0000099	hsa-miR-101-3p	51382	ENSG00000100554	ATP6V1D
ENSG00000256341.1	RP11-21A7A.3	MIMAT0000073	hsa-miR-19a-3p	4233	ENSG00000105976	MET
ENSG00000256341.1	RP11-21A7A.3	MIMAT0000073	hsa-miR-19a-3p	4067	ENSG00000254087	LYN
ENSG00000256341.1	RP11-21A7A.3	MIMAT0000073	hsa-miR-19a-3p	9020	ENSG00000282637	MAP3K14
ENSG00000256341.1	RP11-21A7A.3	MIMAT0000073	hsa-miR-19a-3p	3576	ENSG00000169429	CXCL8
ENSG00000256341.1	RP11-21A7A.3	MIMAT0000073	hsa-miR-19a-3p	5602	ENSG00000109339	MAPK10
ENSG00000256341.1	RP11-21A7A.3	MIMAT0000073	hsa-miR-19a-3p	9020	ENSG00000006062	MAP3K14
ENSG00000257167.2	TMPO-AS1	MIMAT0000068	hsa-miR-15a-5p	83700	ENSG00000166086	JAM3
ENSG00000257167.2	TMPO-AS1	MIMAT0000068	hsa-miR-15a-5p	50848	ENSG00000158769	F11R
ENSG00000257167.2	TMPO-AS1	MIMAT0000068	hsa-miR-15a-5p	1956	ENSG00000146648	EGFR
ENSG00000257167.2	TMPO-AS1	MIMAT0000068	hsa-miR-15a-5p	9020	ENSG00000282637	MAP3K14
ENSG00000257167.2	TMPO-AS1	MIMAT0000068	hsa-miR-15a-5p	10312	ENSG00000110719	TCIRG1
ENSG00000257167.2	TMPO-AS1	MIMAT0000068	hsa-miR-15a-5p	9020	ENSG00000006062	MAP3K14
ENSG00000257497.2	RP11-585P4.5	MIMAT0000068	hsa-miR-15a-5p	9020	ENSG00000282637	MAP3K14
ENSG00000257497.2	RP11-585P4.5	MIMAT0000068	hsa-miR-15a-5p	50848	ENSG00000158769	F11R
ENSG00000257497.2	RP11-585P4.5	MIMAT0000068	hsa-miR-15a-5p	10312	ENSG00000110719	TCIRG1
ENSG00000257497.2	RP11-585P4.5	MIMAT0000068	hsa-miR-15a-5p	83700	ENSG00000166086	JAM3
ENSG00000257497.2	RP11-585P4.5	MIMAT0000068	hsa-miR-15a-5p	1956	ENSG00000146648	EGFR
ENSG00000257497.2	RP11-585P4.5	MIMAT0000068	hsa-miR-15a-5p	9020	ENSG00000006062	MAP3K14
ENSG00000258057.4	BCDIN3D-AS1	MIMAT0000085	hsa-miR-28-5p	50848	ENSG00000158769	F11R
ENSG00000258057.4	BCDIN3D-AS1	MIMAT0000085	hsa-miR-28-5p	83700	ENSG00000166086	JAM3
ENSG00000258760.1	CTD-2509G16.5	MIMAT0002890	hsa-miR-299-5p	5602	ENSG00000109339	MAPK10
ENSG00000258760.1	CTD-2509G16.5	MIMAT0002890	hsa-miR-299-5p	4792	ENSG00000100906	NFKBIA
ENSG00000258884.1	CTD-3035D6.2	MIMAT0000455	hsa-miR-185-5p	3576	ENSG00000169429	CXCL8
ENSG00000258884.1	CTD-3035D6.2	MIMAT0000455	hsa-miR-185-5p	7082	ENSG00000277401	TJP1
ENSG00000258884.1	CTD-3035D6.2	MIMAT0000455	hsa-miR-185-5p	4067	ENSG00000254087	LYN
ENSG00000258884.1	CTD-3035D6.2	MIMAT0000455	hsa-miR-185-5p	1956	ENSG00000146648	EGFR
ENSG00000258884.1	CTD-3035D6.2	MIMAT0000455	hsa-miR-185-5p	7082	ENSG00000104067	TJP1
ENSG00000259291.2	RP11-617F23.1	MIMAT0000068	hsa-miR-15a-5p	50848	ENSG00000158769	F11R
ENSG00000259291.2	RP11-617F23.1	MIMAT0000068	hsa-miR-15a-5p	10312	ENSG00000110719	TCIRG1
ENSG00000259291.2	RP11-617F23.1	MIMAT0000068	hsa-miR-15a-5p	83700	ENSG00000166086	JAM3
ENSG00000259291.2	RP11-617F23.1	MIMAT0000068	hsa-miR-15a-5p	9020	ENSG00000006062	MAP3K14
ENSG00000259291.2	RP11-617F23.1	MIMAT0000068	hsa-miR-15a-5p	1956	ENSG00000146648	EGFR
ENSG00000259291.2	RP11-617F23.1	MIMAT0000068	hsa-miR-15a-5p	9020	ENSG00000282637	MAP3K14
ENSG00000259343.4	TMC3-AS1	MIMAT0000068	hsa-miR-15a-5p	9020	ENSG00000006062	MAP3K14
ENSG00000259343.4	TMC3-AS1	MIMAT0000068	hsa-miR-15a-5p	50848	ENSG00000158769	F11R
ENSG00000259343.4	TMC3-AS1	MIMAT0000068	hsa-miR-15a-5p	83700	ENSG00000166086	JAM3
ENSG00000259343.4	TMC3-AS1	MIMAT0000068	hsa-miR-15a-5p	10312	ENSG00000110719	TCIRG1
ENSG00000259343.4	TMC3-AS1	MIMAT0000068	hsa-miR-15a-5p	1956	ENSG00000146648	EGFR
ENSG00000259343.4	TMC3-AS1	MIMAT0000068	hsa-miR-15a-5p	9020	ENSG00000282637	MAP3K14
ENSG00000259407.1	RP11-158M2.3	MIMAT0003312	hsa-miR-642a-5p	83700	ENSG00000166086	JAM3
ENSG00000259407.1	RP11-158M2.3	MIMAT0003312	hsa-miR-642a-5p	50848	ENSG00000158769	F11R
ENSG00000259407.1	RP11-158M2.3	MIMAT0003312	hsa-miR-642a-5p	3725	ENSG00000177606	JUN
ENSG00000259663.2	CTD-2314G24.2	MIMAT0003244	hsa-miR-579-3p	4233	ENSG00000105976	MET
ENSG00000259663.2	CTD-2314G24.2	MIMAT0003244	hsa-miR-579-3p	2919	ENSG00000163739	CXCL1
ENSG00000259663.2	CTD-2314G24.2	MIMAT0003244	hsa-miR-579-3p	51382	ENSG00000100554	ATP6V1D
ENSG00000259663.2	CTD-2314G24.2	MIMAT0003244	hsa-miR-579-3p	3576	ENSG00000169429	CXCL8
ENSG00000259663.2	CTD-2314G24.2	MIMAT0003244	hsa-miR-579-3p	1956	ENSG00000146648	EGFR
ENSG00000259663.2	CTD-2314G24.2	MIMAT0003244	hsa-miR-579-3p	50848	ENSG00000158769	F11R
ENSG00000259708.1	RP11-762H8.3	MIMAT0000068	hsa-miR-15a-5p	50848	ENSG00000158769	F11R
ENSG00000259708.1	RP11-762H8.3	MIMAT0000068	hsa-miR-15a-5p	10312	ENSG00000110719	TCIRG1
ENSG00000259708.1	RP11-762H8.3	MIMAT0000068	hsa-miR-15a-5p	9020	ENSG00000282637	MAP3K14
ENSG00000259708.1	RP11-762H8.3	MIMAT0000068	hsa-miR-15a-5p	9020	ENSG00000006062	MAP3K14
ENSG00000259708.1	RP11-762H8.3	MIMAT0000068	hsa-miR-15a-5p	1956	ENSG00000146648	EGFR
ENSG00000259708.1	RP11-762H8.3	MIMAT0000068	hsa-miR-15a-5p	83700	ENSG00000166086	JAM3
ENSG00000259744.1	RP11-138H8.6	MIMAT0000068	hsa-miR-15a-5p	9020	ENSG00000282637	MAP3K14
ENSG00000259744.1	RP11-138H8.6	MIMAT0000068	hsa-miR-15a-5p	50848	ENSG00000158769	F11R
ENSG00000259744.1	RP11-138H8.6	MIMAT0000068	hsa-miR-15a-5p	9020	ENSG00000006062	MAP3K14
ENSG00000259744.1	RP11-138H8.6	MIMAT0000068	hsa-miR-15a-5p	83700	ENSG00000166086	JAM3
ENSG00000259744.1	RP11-138H8.6	MIMAT0000068	hsa-miR-15a-5p	1956	ENSG00000146648	EGFR
ENSG00000259744.1	RP11-138H8.6	MIMAT0000068	hsa-miR-15a-5p	10312	ENSG00000110719	TCIRG1
ENSG00000259834.1	RP11-284N8.3	MIMAT0002874	hsa-miR-503-5p	9020	ENSG00000282637	MAP3K14
ENSG00000259834.1	RP11-284N8.3	MIMAT0002874	hsa-miR-503-5p	1956	ENSG00000146648	EGFR
ENSG00000259834.1	RP11-284N8.3	MIMAT0002874	hsa-miR-503-5p	9020	ENSG00000006062	MAP3K14
ENSG00000259834.1	RP11-284N8.3	MIMAT0002874	hsa-miR-503-5p	50848	ENSG00000158769	F11R
ENSG00000259834.1	RP11-284N8.3	MIMAT0002874	hsa-miR-503-5p	83700	ENSG00000166086	JAM3
ENSG00000259877.2	RP11-46C24.7	MIMAT0000068	hsa-miR-15a-5p	50848	ENSG00000158769	F11R
ENSG00000259877.2	RP11-46C24.7	MIMAT0000068	hsa-miR-15a-5p	9020	ENSG00000282637	MAP3K14
ENSG00000259877.2	RP11-46C24.7	MIMAT0000068	hsa-miR-15a-5p	9020	ENSG00000006062	MAP3K14
ENSG00000259877.2	RP11-46C24.7	MIMAT0000068	hsa-miR-15a-5p	83700	ENSG00000166086	JAM3
ENSG00000259877.2	RP11-46C24.7	MIMAT0000068	hsa-miR-15a-5p	10312	ENSG00000110719	TCIRG1
ENSG00000259877.2	RP11-46C24.7	MIMAT0000068	hsa-miR-15a-5p	1956	ENSG00000146648	EGFR
ENSG00000259910.1	RP11-616M22.2	MIMAT0000068	hsa-miR-15a-5p	9020	ENSG00000282637	MAP3K14
ENSG00000259910.1	RP11-616M22.2	MIMAT0000068	hsa-miR-15a-5p	50848	ENSG00000158769	F11R
ENSG00000259910.1	RP11-616M22.2	MIMAT0000068	hsa-miR-15a-5p	10312	ENSG00000110719	TCIRG1
ENSG00000259910.1	RP11-616M22.2	MIMAT0000068	hsa-miR-15a-5p	9020	ENSG00000006062	MAP3K14
ENSG00000259910.1	RP11-616M22.2	MIMAT0000068	hsa-miR-15a-5p	83700	ENSG00000166086	JAM3
ENSG00000259910.1	RP11-616M22.2	MIMAT0000068	hsa-miR-15a-5p	1956	ENSG00000146648	EGFR
ENSG00000259926.1	RP11-44F14.5	MIMAT0000091	hsa-miR-33a-5p	7082	ENSG00000277401	TJP1
ENSG00000259926.1	RP11-44F14.5	MIMAT0000091	hsa-miR-33a-5p	4067	ENSG00000254087	LYN
ENSG00000259926.1	RP11-44F14.5	MIMAT0000091	hsa-miR-33a-5p	7082	ENSG00000104067	TJP1
ENSG00000259926.1	RP11-44F14.5	MIMAT0000091	hsa-miR-33a-5p	1956	ENSG00000146648	EGFR
ENSG00000259926.1	RP11-44F14.5	MIMAT0000091	hsa-miR-33a-5p	5602	ENSG00000109339	MAPK10
ENSG00000259953.1	RP11-4O1.2	MIMAT0000068	hsa-miR-15a-5p	1956	ENSG00000146648	EGFR
ENSG00000259953.1	RP11-4O1.2	MIMAT0000068	hsa-miR-15a-5p	50848	ENSG00000158769	F11R
ENSG00000259953.1	RP11-4O1.2	MIMAT0000068	hsa-miR-15a-5p	10312	ENSG00000110719	TCIRG1
ENSG00000259953.1	RP11-4O1.2	MIMAT0000068	hsa-miR-15a-5p	9020	ENSG00000006062	MAP3K14
ENSG00000259953.1	RP11-4O1.2	MIMAT0000068	hsa-miR-15a-5p	83700	ENSG00000166086	JAM3
ENSG00000259953.1	RP11-4O1.2	MIMAT0000068	hsa-miR-15a-5p	9020	ENSG00000282637	MAP3K14
ENSG00000259974.2	LINC00261	MIMAT0000232	hsa-miR-199a-3p	7082	ENSG00000104067	TJP1
ENSG00000259974.2	LINC00261	MIMAT0000232	hsa-miR-199a-3p	7082	ENSG00000277401	TJP1
ENSG00000259974.2	LINC00261	MIMAT0000232	hsa-miR-199a-3p	4233	ENSG00000105976	MET
ENSG00000259974.2	LINC00261	MIMAT0000232	hsa-miR-199a-3p	50848	ENSG00000158769	F11R
ENSG00000260136.4	CTD-2270L9.4	MIMAT0000687	hsa-miR-299-3p	1956	ENSG00000146648	EGFR
ENSG00000260136.4	CTD-2270L9.4	MIMAT0000687	hsa-miR-299-3p	4792	ENSG00000100906	NFKBIA
ENSG00000260136.4	CTD-2270L9.4	MIMAT0000687	hsa-miR-299-3p	9020	ENSG00000006062	MAP3K14
ENSG00000260136.4	CTD-2270L9.4	MIMAT0000687	hsa-miR-299-3p	9020	ENSG00000282637	MAP3K14
ENSG00000260278.1	RP11-109G23.3	MIMAT0000068	hsa-miR-15a-5p	83700	ENSG00000166086	JAM3
ENSG00000260278.1	RP11-109G23.3	MIMAT0000068	hsa-miR-15a-5p	10312	ENSG00000110719	TCIRG1
ENSG00000260278.1	RP11-109G23.3	MIMAT0000068	hsa-miR-15a-5p	9020	ENSG00000282637	MAP3K14
ENSG00000260278.1	RP11-109G23.3	MIMAT0000068	hsa-miR-15a-5p	1956	ENSG00000146648	EGFR
ENSG00000260278.1	RP11-109G23.3	MIMAT0000068	hsa-miR-15a-5p	50848	ENSG00000158769	F11R
ENSG00000260278.1	RP11-109G23.3	MIMAT0000068	hsa-miR-15a-5p	9020	ENSG00000006062	MAP3K14
ENSG00000260400.1	RP11-119F7.5	MIMAT0000431	hsa-miR-140-5p	7082	ENSG00000104067	TJP1
ENSG00000260400.1	RP11-119F7.5	MIMAT0000431	hsa-miR-140-5p	83700	ENSG00000166086	JAM3
ENSG00000260400.1	RP11-119F7.5	MIMAT0000431	hsa-miR-140-5p	4233	ENSG00000105976	MET
ENSG00000260400.1	RP11-119F7.5	MIMAT0000431	hsa-miR-140-5p	7082	ENSG00000277401	TJP1
ENSG00000260400.1	RP11-119F7.5	MIMAT0000431	hsa-miR-140-5p	9020	ENSG00000282637	MAP3K14
ENSG00000260400.1	RP11-119F7.5	MIMAT0000431	hsa-miR-140-5p	9020	ENSG00000006062	MAP3K14
ENSG00000260400.1	RP11-119F7.5	MIMAT0000431	hsa-miR-140-5p	50848	ENSG00000158769	F11R
ENSG00000260464.1	RP4-561L24.3	MIMAT0000068	hsa-miR-15a-5p	9020	ENSG00000006062	MAP3K14
ENSG00000260464.1	RP4-561L24.3	MIMAT0000068	hsa-miR-15a-5p	1956	ENSG00000146648	EGFR
ENSG00000260464.1	RP4-561L24.3	MIMAT0000068	hsa-miR-15a-5p	9020	ENSG00000282637	MAP3K14
ENSG00000260464.1	RP4-561L24.3	MIMAT0000068	hsa-miR-15a-5p	50848	ENSG00000158769	F11R
ENSG00000260464.1	RP4-561L24.3	MIMAT0000068	hsa-miR-15a-5p	83700	ENSG00000166086	JAM3
ENSG00000260464.1	RP4-561L24.3	MIMAT0000068	hsa-miR-15a-5p	10312	ENSG00000110719	TCIRG1
ENSG00000260470.1	RP11-834C11.11	MIMAT0002888	hsa-miR-532-5p	2919	ENSG00000163739	CXCL1
ENSG00000260470.1	RP11-834C11.11	MIMAT0002888	hsa-miR-532-5p	4233	ENSG00000105976	MET
ENSG00000260470.1	RP11-834C11.11	MIMAT0002888	hsa-miR-532-5p	7082	ENSG00000277401	TJP1
ENSG00000260470.1	RP11-834C11.11	MIMAT0002888	hsa-miR-532-5p	7082	ENSG00000104067	TJP1
ENSG00000260583.1	AP000223.42	MIMAT0000232	hsa-miR-199a-3p	50848	ENSG00000158769	F11R
ENSG00000260583.1	AP000223.42	MIMAT0000232	hsa-miR-199a-3p	4233	ENSG00000105976	MET
ENSG00000260583.1	AP000223.42	MIMAT0000232	hsa-miR-199a-3p	7082	ENSG00000277401	TJP1
ENSG00000260583.1	AP000223.42	MIMAT0000232	hsa-miR-199a-3p	7082	ENSG00000104067	TJP1
ENSG00000260625.2	RP11-452L6.7	MIMAT0000068	hsa-miR-15a-5p	9020	ENSG00000282637	MAP3K14
ENSG00000260625.2	RP11-452L6.7	MIMAT0000068	hsa-miR-15a-5p	83700	ENSG00000166086	JAM3
ENSG00000260625.2	RP11-452L6.7	MIMAT0000068	hsa-miR-15a-5p	1956	ENSG00000146648	EGFR
ENSG00000260625.2	RP11-452L6.7	MIMAT0000068	hsa-miR-15a-5p	9020	ENSG00000006062	MAP3K14
ENSG00000260625.2	RP11-452L6.7	MIMAT0000068	hsa-miR-15a-5p	10312	ENSG00000110719	TCIRG1
ENSG00000260625.2	RP11-452L6.7	MIMAT0000068	hsa-miR-15a-5p	50848	ENSG00000158769	F11R
ENSG00000260708.1	CTA-29F11.1	MIMAT0000089	hsa-miR-31-5p	83700	ENSG00000166086	JAM3
ENSG00000260708.1	CTA-29F11.1	MIMAT0000089	hsa-miR-31-5p	9020	ENSG00000282637	MAP3K14
ENSG00000260708.1	CTA-29F11.1	MIMAT0000089	hsa-miR-31-5p	9020	ENSG00000006062	MAP3K14
ENSG00000260708.1	CTA-29F11.1	MIMAT0000089	hsa-miR-31-5p	4233	ENSG00000105976	MET
ENSG00000260711.2	RP11-747H7.3	MIMAT0000242	hsa-miR-129-5p	4067	ENSG00000254087	LYN
ENSG00000260711.2	RP11-747H7.3	MIMAT0000242	hsa-miR-129-5p	50848	ENSG00000158769	F11R
ENSG00000260711.2	RP11-747H7.3	MIMAT0000242	hsa-miR-129-5p	4792	ENSG00000100906	NFKBIA
ENSG00000260711.2	RP11-747H7.3	MIMAT0000242	hsa-miR-129-5p	4233	ENSG00000105976	MET
ENSG00000260711.2	RP11-747H7.3	MIMAT0000242	hsa-miR-129-5p	1956	ENSG00000146648	EGFR
ENSG00000260711.2	RP11-747H7.3	MIMAT0000242	hsa-miR-129-5p	3576	ENSG00000169429	CXCL8
ENSG00000260757.1	RP11-120K18.2	MIMAT0000085	hsa-miR-28-5p	50848	ENSG00000158769	F11R
ENSG00000260757.1	RP11-120K18.2	MIMAT0000085	hsa-miR-28-5p	83700	ENSG00000166086	JAM3
ENSG00000260807.5	RP11-161M6.2	MIMAT0000073	hsa-miR-19a-3p	4067	ENSG00000254087	LYN
ENSG00000260807.5	RP11-161M6.2	MIMAT0000073	hsa-miR-19a-3p	4233	ENSG00000105976	MET
ENSG00000260807.5	RP11-161M6.2	MIMAT0000073	hsa-miR-19a-3p	9020	ENSG00000282637	MAP3K14
ENSG00000260807.5	RP11-161M6.2	MIMAT0000073	hsa-miR-19a-3p	5602	ENSG00000109339	MAPK10
ENSG00000260807.5	RP11-161M6.2	MIMAT0000073	hsa-miR-19a-3p	9020	ENSG00000006062	MAP3K14
ENSG00000260807.5	RP11-161M6.2	MIMAT0000073	hsa-miR-19a-3p	3576	ENSG00000169429	CXCL8
ENSG00000260855.1	RP11-439E19.10	MIMAT0000271	hsa-miR-214-3p	50848	ENSG00000158769	F11R
ENSG00000260855.1	RP11-439E19.10	MIMAT0000271	hsa-miR-214-3p	9020	ENSG00000006062	MAP3K14
ENSG00000260855.1	RP11-439E19.10	MIMAT0000271	hsa-miR-214-3p	83700	ENSG00000166086	JAM3
ENSG00000260855.1	RP11-439E19.10	MIMAT0000271	hsa-miR-214-3p	9020	ENSG00000282637	MAP3K14
ENSG00000260917.1	RP11-57H14.4	MIMAT0003161	hsa-miR-493-3p	83700	ENSG00000166086	JAM3
ENSG00000260917.1	RP11-57H14.4	MIMAT0003161	hsa-miR-493-3p	1956	ENSG00000146648	EGFR
ENSG00000260997.1	RP4-647J21.1	MIMAT0002175	hsa-miR-485-5p	83700	ENSG00000166086	JAM3
ENSG00000260997.1	RP4-647J21.1	MIMAT0002175	hsa-miR-485-5p	4233	ENSG00000105976	MET
ENSG00000260997.1	RP4-647J21.1	MIMAT0002175	hsa-miR-485-5p	9020	ENSG00000282637	MAP3K14
ENSG00000260997.1	RP4-647J21.1	MIMAT0002175	hsa-miR-485-5p	9020	ENSG00000006062	MAP3K14
ENSG00000261008.5	LINC01572	MIMAT0000068	hsa-miR-15a-5p	9020	ENSG00000282637	MAP3K14
ENSG00000261008.5	LINC01572	MIMAT0000068	hsa-miR-15a-5p	10312	ENSG00000110719	TCIRG1
ENSG00000261008.5	LINC01572	MIMAT0000068	hsa-miR-15a-5p	9020	ENSG00000006062	MAP3K14
ENSG00000261008.5	LINC01572	MIMAT0000068	hsa-miR-15a-5p	83700	ENSG00000166086	JAM3
ENSG00000261008.5	LINC01572	MIMAT0000068	hsa-miR-15a-5p	1956	ENSG00000146648	EGFR
ENSG00000261008.5	LINC01572	MIMAT0000068	hsa-miR-15a-5p	50848	ENSG00000158769	F11R
ENSG00000261064.1	RP11-1000B6.3	MIMAT0000451	hsa-miR-150-5p	9020	ENSG00000006062	MAP3K14
ENSG00000261064.1	RP11-1000B6.3	MIMAT0000451	hsa-miR-150-5p	51382	ENSG00000100554	ATP6V1D
ENSG00000261064.1	RP11-1000B6.3	MIMAT0000451	hsa-miR-150-5p	9020	ENSG00000282637	MAP3K14
ENSG00000261064.1	RP11-1000B6.3	MIMAT0000451	hsa-miR-150-5p	4233	ENSG00000105976	MET
ENSG00000261069.3	RP11-701H24.4	MIMAT0000095	hsa-miR-96-5p	9020	ENSG00000282637	MAP3K14
ENSG00000261069.3	RP11-701H24.4	MIMAT0000095	hsa-miR-96-5p	9020	ENSG00000006062	MAP3K14
ENSG00000261069.3	RP11-701H24.4	MIMAT0000095	hsa-miR-96-5p	4233	ENSG00000105976	MET
ENSG00000261069.3	RP11-701H24.4	MIMAT0000095	hsa-miR-96-5p	50848	ENSG00000158769	F11R
ENSG00000261069.3	RP11-701H24.4	MIMAT0000095	hsa-miR-96-5p	51382	ENSG00000100554	ATP6V1D
ENSG00000261098.1	RP11-819C21.1	MIMAT0003294	hsa-miR-625-5p	3725	ENSG00000177606	JUN
ENSG00000261098.1	RP11-819C21.1	MIMAT0003294	hsa-miR-625-5p	1956	ENSG00000146648	EGFR
ENSG00000261396.1	CTD-2012K14.2	MIMAT0000095	hsa-miR-96-5p	4233	ENSG00000105976	MET
ENSG00000261396.1	CTD-2012K14.2	MIMAT0000095	hsa-miR-96-5p	50848	ENSG00000158769	F11R
ENSG00000261396.1	CTD-2012K14.2	MIMAT0000095	hsa-miR-96-5p	51382	ENSG00000100554	ATP6V1D
ENSG00000261396.1	CTD-2012K14.2	MIMAT0000095	hsa-miR-96-5p	9020	ENSG00000006062	MAP3K14
ENSG00000261396.1	CTD-2012K14.2	MIMAT0000095	hsa-miR-96-5p	9020	ENSG00000282637	MAP3K14
ENSG00000261534.1	RP11-244O19.1	MIMAT0000433	hsa-miR-142-5p	3576	ENSG00000169429	CXCL8
ENSG00000261534.1	RP11-244O19.1	MIMAT0000433	hsa-miR-142-5p	1956	ENSG00000146648	EGFR
ENSG00000261616.1	RP11-6O2.3	MIMAT0000085	hsa-miR-28-5p	83700	ENSG00000166086	JAM3
ENSG00000261616.1	RP11-6O2.3	MIMAT0000085	hsa-miR-28-5p	50848	ENSG00000158769	F11R
ENSG00000261618.1	RP11-79H23.3	MIMAT0000753	hsa-miR-342-3p	7082	ENSG00000104067	TJP1
ENSG00000261618.1	RP11-79H23.3	MIMAT0000753	hsa-miR-342-3p	3576	ENSG00000169429	CXCL8
ENSG00000261618.1	RP11-79H23.3	MIMAT0000753	hsa-miR-342-3p	7082	ENSG00000277401	TJP1
ENSG00000261618.1	RP11-79H23.3	MIMAT0000753	hsa-miR-342-3p	1956	ENSG00000146648	EGFR
ENSG00000261618.1	RP11-79H23.3	MIMAT0000753	hsa-miR-342-3p	50848	ENSG00000158769	F11R
ENSG00000262251.1	RP11-199F11.2	MIMAT0000727	hsa-miR-374a-5p	7082	ENSG00000277401	TJP1
ENSG00000262251.1	RP11-199F11.2	MIMAT0000727	hsa-miR-374a-5p	7082	ENSG00000104067	TJP1
ENSG00000262251.1	RP11-199F11.2	MIMAT0000727	hsa-miR-374a-5p	4233	ENSG00000105976	MET
ENSG00000262251.1	RP11-199F11.2	MIMAT0000727	hsa-miR-374a-5p	2919	ENSG00000163739	CXCL1
ENSG00000262468.4	LINC01569	MIMAT0000089	hsa-miR-31-5p	9020	ENSG00000006062	MAP3K14
ENSG00000262468.4	LINC01569	MIMAT0000089	hsa-miR-31-5p	9020	ENSG00000282637	MAP3K14
ENSG00000262468.4	LINC01569	MIMAT0000089	hsa-miR-31-5p	83700	ENSG00000166086	JAM3
ENSG00000262468.4	LINC01569	MIMAT0000089	hsa-miR-31-5p	4233	ENSG00000105976	MET
ENSG00000262580.4	RP11-334C17.5	MIMAT0000442	hsa-miR-9-3p	1956	ENSG00000146648	EGFR
ENSG00000262879.4	RP11-156P1.3	MIMAT0004793	hsa-miR-556-3p	7082	ENSG00000277401	TJP1
ENSG00000262879.4	RP11-156P1.3	MIMAT0004793	hsa-miR-556-3p	3725	ENSG00000177606	JUN
ENSG00000262879.4	RP11-156P1.3	MIMAT0004793	hsa-miR-556-3p	5602	ENSG00000109339	MAPK10
ENSG00000262879.4	RP11-156P1.3	MIMAT0004793	hsa-miR-556-3p	4233	ENSG00000105976	MET
ENSG00000262879.4	RP11-156P1.3	MIMAT0004793	hsa-miR-556-3p	7082	ENSG00000104067	TJP1
ENSG00000263080.1	RP11-485G7.5	MIMAT0000072	hsa-miR-18a-5p	50848	ENSG00000158769	F11R
ENSG00000263080.1	RP11-485G7.5	MIMAT0000072	hsa-miR-18a-5p	4792	ENSG00000100906	NFKBIA
ENSG00000263080.1	RP11-485G7.5	MIMAT0000072	hsa-miR-18a-5p	83700	ENSG00000166086	JAM3
ENSG00000263235.1	RP11-461A8.4	MIMAT0000455	hsa-miR-185-5p	4067	ENSG00000254087	LYN
ENSG00000263235.1	RP11-461A8.4	MIMAT0000455	hsa-miR-185-5p	3576	ENSG00000169429	CXCL8
ENSG00000263235.1	RP11-461A8.4	MIMAT0000455	hsa-miR-185-5p	1956	ENSG00000146648	EGFR
ENSG00000263235.1	RP11-461A8.4	MIMAT0000455	hsa-miR-185-5p	7082	ENSG00000104067	TJP1
ENSG00000263235.1	RP11-461A8.4	MIMAT0000455	hsa-miR-185-5p	7082	ENSG00000277401	TJP1
ENSG00000263477.1	RP11-338L22.2	MIMAT0000068	hsa-miR-15a-5p	83700	ENSG00000166086	JAM3
ENSG00000263477.1	RP11-338L22.2	MIMAT0000068	hsa-miR-15a-5p	9020	ENSG00000282637	MAP3K14
ENSG00000263477.1	RP11-338L22.2	MIMAT0000068	hsa-miR-15a-5p	50848	ENSG00000158769	F11R
ENSG00000263477.1	RP11-338L22.2	MIMAT0000068	hsa-miR-15a-5p	1956	ENSG00000146648	EGFR
ENSG00000263477.1	RP11-338L22.2	MIMAT0000068	hsa-miR-15a-5p	10312	ENSG00000110719	TCIRG1
ENSG00000263477.1	RP11-338L22.2	MIMAT0000068	hsa-miR-15a-5p	9020	ENSG00000006062	MAP3K14
ENSG00000263590.2	RP11-403I13.7	MIMAT0000072	hsa-miR-18a-5p	50848	ENSG00000158769	F11R
ENSG00000263590.2	RP11-403I13.7	MIMAT0000072	hsa-miR-18a-5p	83700	ENSG00000166086	JAM3
ENSG00000263590.2	RP11-403I13.7	MIMAT0000072	hsa-miR-18a-5p	4792	ENSG00000100906	NFKBIA
ENSG00000263786.1	RP11-649A18.4	MIMAT0000271	hsa-miR-214-3p	9020	ENSG00000282637	MAP3K14
ENSG00000263786.1	RP11-649A18.4	MIMAT0000271	hsa-miR-214-3p	50848	ENSG00000158769	F11R
ENSG00000263786.1	RP11-649A18.4	MIMAT0000271	hsa-miR-214-3p	83700	ENSG00000166086	JAM3
ENSG00000263786.1	RP11-649A18.4	MIMAT0000271	hsa-miR-214-3p	9020	ENSG00000006062	MAP3K14
ENSG00000264672.4	SEPT4-AS1	MIMAT0000091	hsa-miR-33a-5p	7082	ENSG00000104067	TJP1
ENSG00000264672.4	SEPT4-AS1	MIMAT0000091	hsa-miR-33a-5p	4067	ENSG00000254087	LYN
ENSG00000264672.4	SEPT4-AS1	MIMAT0000091	hsa-miR-33a-5p	1956	ENSG00000146648	EGFR
ENSG00000264672.4	SEPT4-AS1	MIMAT0000091	hsa-miR-33a-5p	5602	ENSG00000109339	MAPK10
ENSG00000264672.4	SEPT4-AS1	MIMAT0000091	hsa-miR-33a-5p	7082	ENSG00000277401	TJP1
ENSG00000264859.4	DSG2-AS1	MIMAT0000440	hsa-miR-191-5p	7082	ENSG00000104067	TJP1
ENSG00000264859.4	DSG2-AS1	MIMAT0000440	hsa-miR-191-5p	58494	ENSG00000154721	JAM2
ENSG00000264859.4	DSG2-AS1	MIMAT0000440	hsa-miR-191-5p	7082	ENSG00000277401	TJP1
ENSG00000265206.3	RP5-1171I10.5	MIMAT0000068	hsa-miR-15a-5p	83700	ENSG00000166086	JAM3
ENSG00000265206.3	RP5-1171I10.5	MIMAT0000068	hsa-miR-15a-5p	9020	ENSG00000282637	MAP3K14
ENSG00000265206.3	RP5-1171I10.5	MIMAT0000068	hsa-miR-15a-5p	1956	ENSG00000146648	EGFR
ENSG00000265206.3	RP5-1171I10.5	MIMAT0000068	hsa-miR-15a-5p	50848	ENSG00000158769	F11R
ENSG00000265206.3	RP5-1171I10.5	MIMAT0000068	hsa-miR-15a-5p	10312	ENSG00000110719	TCIRG1
ENSG00000265206.3	RP5-1171I10.5	MIMAT0000068	hsa-miR-15a-5p	9020	ENSG00000006062	MAP3K14
ENSG00000265489.1	RP11-1090M7.1	MIMAT0000753	hsa-miR-342-3p	1956	ENSG00000146648	EGFR
ENSG00000265489.1	RP11-1090M7.1	MIMAT0000753	hsa-miR-342-3p	7082	ENSG00000277401	TJP1
ENSG00000265489.1	RP11-1090M7.1	MIMAT0000753	hsa-miR-342-3p	50848	ENSG00000158769	F11R
ENSG00000265489.1	RP11-1090M7.1	MIMAT0000753	hsa-miR-342-3p	3576	ENSG00000169429	CXCL8
ENSG00000265489.1	RP11-1090M7.1	MIMAT0000753	hsa-miR-342-3p	7082	ENSG00000104067	TJP1
ENSG00000266088.4	RP5-1028K7.2	MIMAT0000068	hsa-miR-15a-5p	1956	ENSG00000146648	EGFR
ENSG00000266088.4	RP5-1028K7.2	MIMAT0000068	hsa-miR-15a-5p	83700	ENSG00000166086	JAM3
ENSG00000266088.4	RP5-1028K7.2	MIMAT0000068	hsa-miR-15a-5p	9020	ENSG00000006062	MAP3K14
ENSG00000266088.4	RP5-1028K7.2	MIMAT0000068	hsa-miR-15a-5p	9020	ENSG00000282637	MAP3K14
ENSG00000266088.4	RP5-1028K7.2	MIMAT0000068	hsa-miR-15a-5p	10312	ENSG00000110719	TCIRG1
ENSG00000266088.4	RP5-1028K7.2	MIMAT0000068	hsa-miR-15a-5p	50848	ENSG00000158769	F11R
ENSG00000266651.1	RP11-138I1.3	MIMAT0000085	hsa-miR-28-5p	83700	ENSG00000166086	JAM3
ENSG00000266651.1	RP11-138I1.3	MIMAT0000085	hsa-miR-28-5p	50848	ENSG00000158769	F11R
ENSG00000266869.1	RP6-114E22.1	MIMAT0000232	hsa-miR-199a-3p	7082	ENSG00000277401	TJP1
ENSG00000266869.1	RP6-114E22.1	MIMAT0000232	hsa-miR-199a-3p	4233	ENSG00000105976	MET
ENSG00000266869.1	RP6-114E22.1	MIMAT0000232	hsa-miR-199a-3p	50848	ENSG00000158769	F11R
ENSG00000266869.1	RP6-114E22.1	MIMAT0000232	hsa-miR-199a-3p	7082	ENSG00000104067	TJP1
ENSG00000266983.1	CTC-232P5.1	MIMAT0022724	hsa-miR-1277-5p	3725	ENSG00000177606	JUN
ENSG00000266983.1	CTC-232P5.1	MIMAT0022724	hsa-miR-1277-5p	5602	ENSG00000109339	MAPK10
ENSG00000266983.1	CTC-232P5.1	MIMAT0022724	hsa-miR-1277-5p	1956	ENSG00000146648	EGFR
ENSG00000266983.1	CTC-232P5.1	MIMAT0022724	hsa-miR-1277-5p	4792	ENSG00000100906	NFKBIA
ENSG00000267034.1	RP11-384O8.1	MIMAT0000259	hsa-miR-182-5p	51382	ENSG00000100554	ATP6V1D
ENSG00000267034.1	RP11-384O8.1	MIMAT0000259	hsa-miR-182-5p	50848	ENSG00000158769	F11R
ENSG00000267034.1	RP11-384O8.1	MIMAT0000259	hsa-miR-182-5p	4233	ENSG00000105976	MET
ENSG00000267034.1	RP11-384O8.1	MIMAT0000259	hsa-miR-182-5p	9020	ENSG00000006062	MAP3K14
ENSG00000267034.1	RP11-384O8.1	MIMAT0000259	hsa-miR-182-5p	9020	ENSG00000282637	MAP3K14
ENSG00000267048.1	RP11-566K11.7	MIMAT0004985	hsa-miR-942-5p	9020	ENSG00000006062	MAP3K14
ENSG00000267048.1	RP11-566K11.7	MIMAT0004985	hsa-miR-942-5p	9020	ENSG00000282637	MAP3K14
ENSG00000267048.1	RP11-566K11.7	MIMAT0004985	hsa-miR-942-5p	4792	ENSG00000100906	NFKBIA
ENSG00000267048.1	RP11-566K11.7	MIMAT0004985	hsa-miR-942-5p	2919	ENSG00000163739	CXCL1
ENSG00000267048.1	RP11-566K11.7	MIMAT0004985	hsa-miR-942-5p	51382	ENSG00000100554	ATP6V1D
ENSG00000267048.1	RP11-566K11.7	MIMAT0004985	hsa-miR-942-5p	4067	ENSG00000254087	LYN
ENSG00000267048.1	RP11-566K11.7	MIMAT0004985	hsa-miR-942-5p	83700	ENSG00000166086	JAM3
ENSG00000267048.1	RP11-566K11.7	MIMAT0004985	hsa-miR-942-5p	1956	ENSG00000146648	EGFR
ENSG00000267048.1	RP11-566K11.7	MIMAT0004985	hsa-miR-942-5p	3725	ENSG00000177606	JUN
ENSG00000267048.1	RP11-566K11.7	MIMAT0004985	hsa-miR-942-5p	50848	ENSG00000158769	F11R
ENSG00000267058.1	RP11-15A1.3	MIMAT0000275	hsa-miR-218-5p	83700	ENSG00000166086	JAM3
ENSG00000267058.1	RP11-15A1.3	MIMAT0000275	hsa-miR-218-5p	9020	ENSG00000282637	MAP3K14
ENSG00000267058.1	RP11-15A1.3	MIMAT0000275	hsa-miR-218-5p	9020	ENSG00000006062	MAP3K14
ENSG00000267058.1	RP11-15A1.3	MIMAT0000275	hsa-miR-218-5p	1956	ENSG00000146648	EGFR
ENSG00000267130.1	CTD-2540B15.9	MIMAT0000318	hsa-miR-200b-3p	7082	ENSG00000104067	TJP1
ENSG00000267130.1	CTD-2540B15.9	MIMAT0000318	hsa-miR-200b-3p	1956	ENSG00000146648	EGFR
ENSG00000267130.1	CTD-2540B15.9	MIMAT0000318	hsa-miR-200b-3p	4067	ENSG00000254087	LYN
ENSG00000267130.1	CTD-2540B15.9	MIMAT0000318	hsa-miR-200b-3p	83700	ENSG00000166086	JAM3
ENSG00000267130.1	CTD-2540B15.9	MIMAT0000318	hsa-miR-200b-3p	3576	ENSG00000169429	CXCL8
ENSG00000267130.1	CTD-2540B15.9	MIMAT0000318	hsa-miR-200b-3p	7082	ENSG00000277401	TJP1
ENSG00000267130.1	CTD-2540B15.9	MIMAT0000318	hsa-miR-200b-3p	3725	ENSG00000177606	JUN
ENSG00000267130.1	CTD-2540B15.9	MIMAT0000318	hsa-miR-200b-3p	4233	ENSG00000105976	MET
ENSG00000267149.2	CTC-550B14.6	MIMAT0000068	hsa-miR-15a-5p	1956	ENSG00000146648	EGFR
ENSG00000267149.2	CTC-550B14.6	MIMAT0000068	hsa-miR-15a-5p	9020	ENSG00000006062	MAP3K14
ENSG00000267149.2	CTC-550B14.6	MIMAT0000068	hsa-miR-15a-5p	50848	ENSG00000158769	F11R
ENSG00000267149.2	CTC-550B14.6	MIMAT0000068	hsa-miR-15a-5p	83700	ENSG00000166086	JAM3
ENSG00000267149.2	CTC-550B14.6	MIMAT0000068	hsa-miR-15a-5p	10312	ENSG00000110719	TCIRG1
ENSG00000267149.2	CTC-550B14.6	MIMAT0000068	hsa-miR-15a-5p	9020	ENSG00000282637	MAP3K14
ENSG00000267254.4	ZNF790-AS1	MIMAT0000271	hsa-miR-214-3p	9020	ENSG00000006062	MAP3K14
ENSG00000267254.4	ZNF790-AS1	MIMAT0000271	hsa-miR-214-3p	83700	ENSG00000166086	JAM3
ENSG00000267254.4	ZNF790-AS1	MIMAT0000271	hsa-miR-214-3p	50848	ENSG00000158769	F11R
ENSG00000267254.4	ZNF790-AS1	MIMAT0000271	hsa-miR-214-3p	9020	ENSG00000282637	MAP3K14
ENSG00000267327.1	CTD-2008L17.1	MIMAT0003312	hsa-miR-642a-5p	50848	ENSG00000158769	F11R
ENSG00000267327.1	CTD-2008L17.1	MIMAT0003312	hsa-miR-642a-5p	83700	ENSG00000166086	JAM3
ENSG00000267327.1	CTD-2008L17.1	MIMAT0003312	hsa-miR-642a-5p	3725	ENSG00000177606	JUN
ENSG00000267383.5	CTC-260E6.6	MIMAT0000449	hsa-miR-146a-5p	2919	ENSG00000163739	CXCL1
ENSG00000267383.5	CTC-260E6.6	MIMAT0000449	hsa-miR-146a-5p	9020	ENSG00000282637	MAP3K14
ENSG00000267383.5	CTC-260E6.6	MIMAT0000449	hsa-miR-146a-5p	3725	ENSG00000177606	JUN
ENSG00000267383.5	CTC-260E6.6	MIMAT0000449	hsa-miR-146a-5p	83700	ENSG00000166086	JAM3
ENSG00000267383.5	CTC-260E6.6	MIMAT0000449	hsa-miR-146a-5p	9020	ENSG00000006062	MAP3K14
ENSG00000267383.5	CTC-260E6.6	MIMAT0000449	hsa-miR-146a-5p	1956	ENSG00000146648	EGFR
ENSG00000267383.5	CTC-260E6.6	MIMAT0000449	hsa-miR-146a-5p	10312	ENSG00000110719	TCIRG1
ENSG00000267414.1	RP11-456K23.1	MIMAT0000068	hsa-miR-15a-5p	9020	ENSG00000282637	MAP3K14
ENSG00000267414.1	RP11-456K23.1	MIMAT0000068	hsa-miR-15a-5p	83700	ENSG00000166086	JAM3
ENSG00000267414.1	RP11-456K23.1	MIMAT0000068	hsa-miR-15a-5p	1956	ENSG00000146648	EGFR
ENSG00000267414.1	RP11-456K23.1	MIMAT0000068	hsa-miR-15a-5p	50848	ENSG00000158769	F11R
ENSG00000267414.1	RP11-456K23.1	MIMAT0000068	hsa-miR-15a-5p	9020	ENSG00000006062	MAP3K14
ENSG00000267414.1	RP11-456K23.1	MIMAT0000068	hsa-miR-15a-5p	10312	ENSG00000110719	TCIRG1
ENSG00000267532.3	MIR497HG	MIMAT0000087	hsa-miR-30a-5p	1956	ENSG00000146648	EGFR
ENSG00000267532.3	MIR497HG	MIMAT0000087	hsa-miR-30a-5p	83700	ENSG00000166086	JAM3
ENSG00000267532.3	MIR497HG	MIMAT0000087	hsa-miR-30a-5p	3725	ENSG00000177606	JUN
ENSG00000267532.3	MIR497HG	MIMAT0000087	hsa-miR-30a-5p	4067	ENSG00000254087	LYN
ENSG00000267581.1	CTC-559E9.4	MIMAT0000068	hsa-miR-15a-5p	1956	ENSG00000146648	EGFR
ENSG00000267581.1	CTC-559E9.4	MIMAT0000068	hsa-miR-15a-5p	9020	ENSG00000282637	MAP3K14
ENSG00000267581.1	CTC-559E9.4	MIMAT0000068	hsa-miR-15a-5p	50848	ENSG00000158769	F11R
ENSG00000267581.1	CTC-559E9.4	MIMAT0000068	hsa-miR-15a-5p	83700	ENSG00000166086	JAM3
ENSG00000267581.1	CTC-559E9.4	MIMAT0000068	hsa-miR-15a-5p	10312	ENSG00000110719	TCIRG1
ENSG00000267581.1	CTC-559E9.4	MIMAT0000068	hsa-miR-15a-5p	9020	ENSG00000006062	MAP3K14
ENSG00000267751.4	AC009005.2	MIMAT0002175	hsa-miR-485-5p	4233	ENSG00000105976	MET
ENSG00000267751.4	AC009005.2	MIMAT0002175	hsa-miR-485-5p	9020	ENSG00000282637	MAP3K14
ENSG00000267751.4	AC009005.2	MIMAT0002175	hsa-miR-485-5p	9020	ENSG00000006062	MAP3K14
ENSG00000267751.4	AC009005.2	MIMAT0002175	hsa-miR-485-5p	83700	ENSG00000166086	JAM3
ENSG00000268027.4	AC006129.2	MIMAT0000072	hsa-miR-18a-5p	4792	ENSG00000100906	NFKBIA
ENSG00000268027.4	AC006129.2	MIMAT0000072	hsa-miR-18a-5p	50848	ENSG00000158769	F11R
ENSG00000268027.4	AC006129.2	MIMAT0000072	hsa-miR-18a-5p	83700	ENSG00000166086	JAM3
ENSG00000268230.4	CTD-2619J13.8	MIMAT0000068	hsa-miR-15a-5p	83700	ENSG00000166086	JAM3
ENSG00000268230.4	CTD-2619J13.8	MIMAT0000068	hsa-miR-15a-5p	9020	ENSG00000006062	MAP3K14
ENSG00000268230.4	CTD-2619J13.8	MIMAT0000068	hsa-miR-15a-5p	50848	ENSG00000158769	F11R
ENSG00000268230.4	CTD-2619J13.8	MIMAT0000068	hsa-miR-15a-5p	1956	ENSG00000146648	EGFR
ENSG00000268230.4	CTD-2619J13.8	MIMAT0000068	hsa-miR-15a-5p	9020	ENSG00000282637	MAP3K14
ENSG00000268388.4	FENDRR	MIMAT0000095	hsa-miR-96-5p	4233	ENSG00000105976	MET
ENSG00000268388.4	FENDRR	MIMAT0000095	hsa-miR-96-5p	50848	ENSG00000158769	F11R
ENSG00000268388.4	FENDRR	MIMAT0000095	hsa-miR-96-5p	9020	ENSG00000282637	MAP3K14
ENSG00000268388.4	FENDRR	MIMAT0000095	hsa-miR-96-5p	51382	ENSG00000100554	ATP6V1D
ENSG00000268388.4	FENDRR	MIMAT0000095	hsa-miR-96-5p	9020	ENSG00000006062	MAP3K14
ENSG00000268568.1	AC007228.9	MIMAT0004774	hsa-miR-501-3p	7082	ENSG00000104067	TJP1
ENSG00000268568.1	AC007228.9	MIMAT0004774	hsa-miR-501-3p	4233	ENSG00000105976	MET
ENSG00000268568.1	AC007228.9	MIMAT0004774	hsa-miR-501-3p	1956	ENSG00000146648	EGFR
ENSG00000268568.1	AC007228.9	MIMAT0004774	hsa-miR-501-3p	50848	ENSG00000158769	F11R
ENSG00000268568.1	AC007228.9	MIMAT0004774	hsa-miR-501-3p	7082	ENSG00000277401	TJP1
ENSG00000269275.1	CTD-2105E13.15	MIMAT0000068	hsa-miR-15a-5p	10312	ENSG00000110719	TCIRG1
ENSG00000269275.1	CTD-2105E13.15	MIMAT0000068	hsa-miR-15a-5p	9020	ENSG00000282637	MAP3K14
ENSG00000269275.1	CTD-2105E13.15	MIMAT0000068	hsa-miR-15a-5p	83700	ENSG00000166086	JAM3
ENSG00000269275.1	CTD-2105E13.15	MIMAT0000068	hsa-miR-15a-5p	50848	ENSG00000158769	F11R
ENSG00000269275.1	CTD-2105E13.15	MIMAT0000068	hsa-miR-15a-5p	9020	ENSG00000006062	MAP3K14
ENSG00000269275.1	CTD-2105E13.15	MIMAT0000068	hsa-miR-15a-5p	1956	ENSG00000146648	EGFR
ENSG00000269386.4	RAB11B-AS1	MIMAT0000068	hsa-miR-15a-5p	83700	ENSG00000166086	JAM3
ENSG00000269386.4	RAB11B-AS1	MIMAT0000068	hsa-miR-15a-5p	1956	ENSG00000146648	EGFR
ENSG00000269386.4	RAB11B-AS1	MIMAT0000068	hsa-miR-15a-5p	9020	ENSG00000282637	MAP3K14
ENSG00000269386.4	RAB11B-AS1	MIMAT0000068	hsa-miR-15a-5p	10312	ENSG00000110719	TCIRG1
ENSG00000269386.4	RAB11B-AS1	MIMAT0000068	hsa-miR-15a-5p	9020	ENSG00000006062	MAP3K14
ENSG00000269386.4	RAB11B-AS1	MIMAT0000068	hsa-miR-15a-5p	50848	ENSG00000158769	F11R
ENSG00000269559.2	RP11-629B11.5	MIMAT0000278	hsa-miR-221-3p	83700	ENSG00000166086	JAM3
ENSG00000269559.2	RP11-629B11.5	MIMAT0000278	hsa-miR-221-3p	4067	ENSG00000254087	LYN
ENSG00000269559.2	RP11-629B11.5	MIMAT0000278	hsa-miR-221-3p	1956	ENSG00000146648	EGFR
ENSG00000269821.1	KCNQ1OT1	MIMAT0000068	hsa-miR-15a-5p	50848	ENSG00000158769	F11R
ENSG00000269821.1	KCNQ1OT1	MIMAT0000068	hsa-miR-15a-5p	9020	ENSG00000006062	MAP3K14
ENSG00000269821.1	KCNQ1OT1	MIMAT0000068	hsa-miR-15a-5p	1956	ENSG00000146648	EGFR
ENSG00000269821.1	KCNQ1OT1	MIMAT0000068	hsa-miR-15a-5p	10312	ENSG00000110719	TCIRG1
ENSG00000269821.1	KCNQ1OT1	MIMAT0000068	hsa-miR-15a-5p	9020	ENSG00000282637	MAP3K14
ENSG00000269821.1	KCNQ1OT1	MIMAT0000068	hsa-miR-15a-5p	83700	ENSG00000166086	JAM3
ENSG00000269937.1	RP11-20I23.8	MIMAT0000433	hsa-miR-142-5p	1956	ENSG00000146648	EGFR
ENSG00000269937.1	RP11-20I23.8	MIMAT0000433	hsa-miR-142-5p	3576	ENSG00000169429	CXCL8
ENSG00000269959.1	SPACA6P-AS	MIMAT0000089	hsa-miR-31-5p	83700	ENSG00000166086	JAM3
ENSG00000269959.1	SPACA6P-AS	MIMAT0000089	hsa-miR-31-5p	9020	ENSG00000006062	MAP3K14
ENSG00000269959.1	SPACA6P-AS	MIMAT0000089	hsa-miR-31-5p	9020	ENSG00000282637	MAP3K14
ENSG00000269959.1	SPACA6P-AS	MIMAT0000089	hsa-miR-31-5p	4233	ENSG00000105976	MET
ENSG00000270019.1	RP11-141B14.1	MIMAT0000432	hsa-miR-141-3p	1956	ENSG00000146648	EGFR
ENSG00000270019.1	RP11-141B14.1	MIMAT0000432	hsa-miR-141-3p	3725	ENSG00000177606	JUN
ENSG00000270019.1	RP11-141B14.1	MIMAT0000432	hsa-miR-141-3p	4792	ENSG00000100906	NFKBIA
ENSG00000270019.1	RP11-141B14.1	MIMAT0000432	hsa-miR-141-3p	4233	ENSG00000105976	MET
ENSG00000270019.1	RP11-141B14.1	MIMAT0000432	hsa-miR-141-3p	83700	ENSG00000166086	JAM3
ENSG00000270019.1	RP11-141B14.1	MIMAT0000432	hsa-miR-141-3p	7082	ENSG00000104067	TJP1
ENSG00000270019.1	RP11-141B14.1	MIMAT0000432	hsa-miR-141-3p	2919	ENSG00000163739	CXCL1
ENSG00000270019.1	RP11-141B14.1	MIMAT0000432	hsa-miR-141-3p	7082	ENSG00000277401	TJP1
ENSG00000270021.1	CTC-203F4.2	MIMAT0002807	hsa-miR-491-5p	50848	ENSG00000158769	F11R
ENSG00000270021.1	CTC-203F4.2	MIMAT0002807	hsa-miR-491-5p	1956	ENSG00000146648	EGFR
ENSG00000270021.1	CTC-203F4.2	MIMAT0002807	hsa-miR-491-5p	4233	ENSG00000105976	MET
ENSG00000270021.1	CTC-203F4.2	MIMAT0002807	hsa-miR-491-5p	9020	ENSG00000282637	MAP3K14
ENSG00000270021.1	CTC-203F4.2	MIMAT0002807	hsa-miR-491-5p	9020	ENSG00000006062	MAP3K14
ENSG00000270028.1	RP11-380L11.4	MIMAT0000068	hsa-miR-15a-5p	9020	ENSG00000006062	MAP3K14
ENSG00000270028.1	RP11-380L11.4	MIMAT0000068	hsa-miR-15a-5p	83700	ENSG00000166086	JAM3
ENSG00000270028.1	RP11-380L11.4	MIMAT0000068	hsa-miR-15a-5p	1956	ENSG00000146648	EGFR
ENSG00000270028.1	RP11-380L11.4	MIMAT0000068	hsa-miR-15a-5p	50848	ENSG00000158769	F11R
ENSG00000270028.1	RP11-380L11.4	MIMAT0000068	hsa-miR-15a-5p	10312	ENSG00000110719	TCIRG1
ENSG00000270028.1	RP11-380L11.4	MIMAT0000068	hsa-miR-15a-5p	9020	ENSG00000282637	MAP3K14
ENSG00000270066.3	SCARNA2	MIMAT0000068	hsa-miR-15a-5p	10312	ENSG00000110719	TCIRG1
ENSG00000270066.3	SCARNA2	MIMAT0000068	hsa-miR-15a-5p	50848	ENSG00000158769	F11R
ENSG00000270066.3	SCARNA2	MIMAT0000068	hsa-miR-15a-5p	9020	ENSG00000006062	MAP3K14
ENSG00000270066.3	SCARNA2	MIMAT0000068	hsa-miR-15a-5p	83700	ENSG00000166086	JAM3
ENSG00000270066.3	SCARNA2	MIMAT0000068	hsa-miR-15a-5p	9020	ENSG00000282637	MAP3K14
ENSG00000270066.3	SCARNA2	MIMAT0000068	hsa-miR-15a-5p	1956	ENSG00000146648	EGFR
ENSG00000270372.1	RP11-109M17.2	MIMAT0000753	hsa-miR-342-3p	7082	ENSG00000277401	TJP1
ENSG00000270372.1	RP11-109M17.2	MIMAT0000753	hsa-miR-342-3p	50848	ENSG00000158769	F11R
ENSG00000270372.1	RP11-109M17.2	MIMAT0000753	hsa-miR-342-3p	7082	ENSG00000104067	TJP1
ENSG00000270372.1	RP11-109M17.2	MIMAT0000753	hsa-miR-342-3p	1956	ENSG00000146648	EGFR
ENSG00000270372.1	RP11-109M17.2	MIMAT0000753	hsa-miR-342-3p	3576	ENSG00000169429	CXCL8
ENSG00000270605.1	RP5-1092A3.4	MIMAT0000275	hsa-miR-218-5p	9020	ENSG00000282637	MAP3K14
ENSG00000270605.1	RP5-1092A3.4	MIMAT0000275	hsa-miR-218-5p	1956	ENSG00000146648	EGFR
ENSG00000270605.1	RP5-1092A3.4	MIMAT0000275	hsa-miR-218-5p	83700	ENSG00000166086	JAM3
ENSG00000270605.1	RP5-1092A3.4	MIMAT0000275	hsa-miR-218-5p	9020	ENSG00000006062	MAP3K14
ENSG00000270607.1	RP11-359E10.1	MIMAT0000275	hsa-miR-218-5p	83700	ENSG00000166086	JAM3
ENSG00000270607.1	RP11-359E10.1	MIMAT0000275	hsa-miR-218-5p	1956	ENSG00000146648	EGFR
ENSG00000270607.1	RP11-359E10.1	MIMAT0000275	hsa-miR-218-5p	9020	ENSG00000006062	MAP3K14
ENSG00000270607.1	RP11-359E10.1	MIMAT0000275	hsa-miR-218-5p	9020	ENSG00000282637	MAP3K14
ENSG00000270742.1	RP4-802A10.1	MIMAT0000455	hsa-miR-185-5p	7082	ENSG00000277401	TJP1
ENSG00000270742.1	RP4-802A10.1	MIMAT0000455	hsa-miR-185-5p	7082	ENSG00000104067	TJP1
ENSG00000270742.1	RP4-802A10.1	MIMAT0000455	hsa-miR-185-5p	4067	ENSG00000254087	LYN
ENSG00000270742.1	RP4-802A10.1	MIMAT0000455	hsa-miR-185-5p	1956	ENSG00000146648	EGFR
ENSG00000270742.1	RP4-802A10.1	MIMAT0000455	hsa-miR-185-5p	3576	ENSG00000169429	CXCL8
ENSG00000270919.1	RP11-379K22.3	MIMAT0000068	hsa-miR-15a-5p	9020	ENSG00000006062	MAP3K14
ENSG00000270919.1	RP11-379K22.3	MIMAT0000068	hsa-miR-15a-5p	83700	ENSG00000166086	JAM3
ENSG00000270919.1	RP11-379K22.3	MIMAT0000068	hsa-miR-15a-5p	1956	ENSG00000146648	EGFR
ENSG00000270919.1	RP11-379K22.3	MIMAT0000068	hsa-miR-15a-5p	10312	ENSG00000110719	TCIRG1
ENSG00000270919.1	RP11-379K22.3	MIMAT0000068	hsa-miR-15a-5p	9020	ENSG00000282637	MAP3K14
ENSG00000270919.1	RP11-379K22.3	MIMAT0000068	hsa-miR-15a-5p	50848	ENSG00000158769	F11R
ENSG00000270933.1	CTD-2227E11.1	MIMAT0000068	hsa-miR-15a-5p	10312	ENSG00000110719	TCIRG1
ENSG00000270933.1	CTD-2227E11.1	MIMAT0000068	hsa-miR-15a-5p	9020	ENSG00000006062	MAP3K14
ENSG00000270933.1	CTD-2227E11.1	MIMAT0000068	hsa-miR-15a-5p	83700	ENSG00000166086	JAM3
ENSG00000270933.1	CTD-2227E11.1	MIMAT0000068	hsa-miR-15a-5p	50848	ENSG00000158769	F11R
ENSG00000270933.1	CTD-2227E11.1	MIMAT0000068	hsa-miR-15a-5p	9020	ENSG00000282637	MAP3K14
ENSG00000270933.1	CTD-2227E11.1	MIMAT0000068	hsa-miR-15a-5p	1956	ENSG00000146648	EGFR
ENSG00000270977.1	AC015849.16	MIMAT0004780	hsa-miR-532-3p	4233	ENSG00000105976	MET
ENSG00000270977.1	AC015849.16	MIMAT0004780	hsa-miR-532-3p	9020	ENSG00000006062	MAP3K14
ENSG00000270977.1	AC015849.16	MIMAT0004780	hsa-miR-532-3p	9020	ENSG00000282637	MAP3K14
ENSG00000270977.1	AC015849.16	MIMAT0004780	hsa-miR-532-3p	51382	ENSG00000100554	ATP6V1D
ENSG00000271367.1	RP3-483K16.4	MIMAT0004953	hsa-miR-873-5p	3576	ENSG00000169429	CXCL8
ENSG00000271367.1	RP3-483K16.4	MIMAT0004953	hsa-miR-873-5p	50848	ENSG00000158769	F11R
ENSG00000271367.1	RP3-483K16.4	MIMAT0004953	hsa-miR-873-5p	83700	ENSG00000166086	JAM3
ENSG00000271367.1	RP3-483K16.4	MIMAT0004953	hsa-miR-873-5p	2919	ENSG00000163739	CXCL1
ENSG00000271367.1	RP3-483K16.4	MIMAT0004953	hsa-miR-873-5p	51382	ENSG00000100554	ATP6V1D
ENSG00000271367.1	RP3-483K16.4	MIMAT0004953	hsa-miR-873-5p	10312	ENSG00000110719	TCIRG1
ENSG00000271367.1	RP3-483K16.4	MIMAT0004953	hsa-miR-873-5p	1956	ENSG00000146648	EGFR
ENSG00000271590.1	RP11-181E10.3	MIMAT0000738	hsa-miR-383-5p	4233	ENSG00000105976	MET
ENSG00000271880.1	AGAP11	MIMAT0000087	hsa-miR-30a-5p	4067	ENSG00000254087	LYN
ENSG00000271880.1	AGAP11	MIMAT0000087	hsa-miR-30a-5p	1956	ENSG00000146648	EGFR
ENSG00000271880.1	AGAP11	MIMAT0000087	hsa-miR-30a-5p	3725	ENSG00000177606	JUN
ENSG00000271880.1	AGAP11	MIMAT0000087	hsa-miR-30a-5p	83700	ENSG00000166086	JAM3
ENSG00000271926.1	CTD-2376I4.1	MIMAT0000231	hsa-miR-199a-5p	2919	ENSG00000163739	CXCL1
ENSG00000271926.1	CTD-2376I4.1	MIMAT0000231	hsa-miR-199a-5p	58494	ENSG00000154721	JAM2
ENSG00000271926.1	CTD-2376I4.1	MIMAT0000231	hsa-miR-199a-5p	4067	ENSG00000254087	LYN
ENSG00000271926.1	CTD-2376I4.1	MIMAT0000231	hsa-miR-199a-5p	51382	ENSG00000100554	ATP6V1D
ENSG00000271926.1	CTD-2376I4.1	MIMAT0000231	hsa-miR-199a-5p	83700	ENSG00000166086	JAM3
ENSG00000271926.1	CTD-2376I4.1	MIMAT0000231	hsa-miR-199a-5p	50848	ENSG00000158769	F11R
ENSG00000271969.1	U47924.29	MIMAT0000068	hsa-miR-15a-5p	9020	ENSG00000006062	MAP3K14
ENSG00000271969.1	U47924.29	MIMAT0000068	hsa-miR-15a-5p	1956	ENSG00000146648	EGFR
ENSG00000271969.1	U47924.29	MIMAT0000068	hsa-miR-15a-5p	83700	ENSG00000166086	JAM3
ENSG00000271969.1	U47924.29	MIMAT0000068	hsa-miR-15a-5p	10312	ENSG00000110719	TCIRG1
ENSG00000271969.1	U47924.29	MIMAT0000068	hsa-miR-15a-5p	50848	ENSG00000158769	F11R
ENSG00000271969.1	U47924.29	MIMAT0000068	hsa-miR-15a-5p	9020	ENSG00000282637	MAP3K14
ENSG00000272068.1	RP11-284F21.9	MIMAT0003215	hsa-miR-552-3p	4792	ENSG00000100906	NFKBIA
ENSG00000272106.1	RP11-345P4.9	MIMAT0000460	hsa-miR-194-5p	7082	ENSG00000104067	TJP1
ENSG00000272106.1	RP11-345P4.9	MIMAT0000460	hsa-miR-194-5p	51382	ENSG00000100554	ATP6V1D
ENSG00000272106.1	RP11-345P4.9	MIMAT0000460	hsa-miR-194-5p	7082	ENSG00000277401	TJP1
ENSG00000272106.1	RP11-345P4.9	MIMAT0000460	hsa-miR-194-5p	1956	ENSG00000146648	EGFR
ENSG00000272106.1	RP11-345P4.9	MIMAT0000460	hsa-miR-194-5p	4792	ENSG00000100906	NFKBIA
ENSG00000272108.1	AC005754.8	MIMAT0000085	hsa-miR-28-5p	50848	ENSG00000158769	F11R
ENSG00000272108.1	AC005754.8	MIMAT0000085	hsa-miR-28-5p	83700	ENSG00000166086	JAM3
ENSG00000272159.1	RP11-350N15.6	MIMAT0003244	hsa-miR-579-3p	1956	ENSG00000146648	EGFR
ENSG00000272159.1	RP11-350N15.6	MIMAT0003244	hsa-miR-579-3p	50848	ENSG00000158769	F11R
ENSG00000272159.1	RP11-350N15.6	MIMAT0003244	hsa-miR-579-3p	2919	ENSG00000163739	CXCL1
ENSG00000272159.1	RP11-350N15.6	MIMAT0003244	hsa-miR-579-3p	3576	ENSG00000169429	CXCL8
ENSG00000272159.1	RP11-350N15.6	MIMAT0003244	hsa-miR-579-3p	51382	ENSG00000100554	ATP6V1D
ENSG00000272159.1	RP11-350N15.6	MIMAT0003244	hsa-miR-579-3p	4233	ENSG00000105976	MET
ENSG00000272189.1	RP3-325F22.5	MIMAT0000732	hsa-miR-378a-3p	9020	ENSG00000006062	MAP3K14
ENSG00000272189.1	RP3-325F22.5	MIMAT0000732	hsa-miR-378a-3p	9020	ENSG00000282637	MAP3K14
ENSG00000272205.1	RP11-277B15.3	MIMAT0000242	hsa-miR-129-5p	3576	ENSG00000169429	CXCL8
ENSG00000272205.1	RP11-277B15.3	MIMAT0000242	hsa-miR-129-5p	4792	ENSG00000100906	NFKBIA
ENSG00000272205.1	RP11-277B15.3	MIMAT0000242	hsa-miR-129-5p	4233	ENSG00000105976	MET
ENSG00000272205.1	RP11-277B15.3	MIMAT0000242	hsa-miR-129-5p	4067	ENSG00000254087	LYN
ENSG00000272205.1	RP11-277B15.3	MIMAT0000242	hsa-miR-129-5p	1956	ENSG00000146648	EGFR
ENSG00000272205.1	RP11-277B15.3	MIMAT0000242	hsa-miR-129-5p	50848	ENSG00000158769	F11R
ENSG00000272264.1	RP11-92K15.3	MIMAT0000250	hsa-miR-139-5p	9020	ENSG00000006062	MAP3K14
ENSG00000272264.1	RP11-92K15.3	MIMAT0000250	hsa-miR-139-5p	4233	ENSG00000105976	MET
ENSG00000272264.1	RP11-92K15.3	MIMAT0000250	hsa-miR-139-5p	50848	ENSG00000158769	F11R
ENSG00000272264.1	RP11-92K15.3	MIMAT0000250	hsa-miR-139-5p	83700	ENSG00000166086	JAM3
ENSG00000272264.1	RP11-92K15.3	MIMAT0000250	hsa-miR-139-5p	9020	ENSG00000282637	MAP3K14
[truncated: 358 more rows]

## Sheet: Table S9
Table S9. STRING interactions for the genes involved in Epithelial cell signaling in Helicobacter pylori infection lncRNA regulatory pattern.
[truncated: 35 more rows]

[truncated: 1 more sheets: Table S10]
